# Supplementary material for: Integrated proteomics and phosphoproteomics study reveals the potential tumour suppressive function of PCK2 in hepatocellular carcinoma
Source: Royal Society of Chemistry journal article supplement (doi:10.1039/d5ay00090d), 2025-01-01
Supplement: d5ay00090d2.xlsx [file d5ay00090d2.xlsx]

## Sheet: Header Explanation
Overview of the supplemental tables
S1	Clinical and virologgical characteristics of the 6 patients,Clinical_information.
S2	6472 differential identified proteins between HCC tumour and non-tumour tissues
S3	6121 differential quantified proteins between HCC tumour and non-tumour tissues
S4	Detailed information of unique proteins identified in HCC tumour tissues
S5	Detailed information of unique proteins identified in adjacent non-tumour tissues
S6	Up and down regulated proteins obtained by volcano analysis
S7	GO analysis results of up-regulated proteins
S8	GO analysis results of down-regulated proteins
S9	KEGG pathways of up-regulated proteins
S10	KEGG pathways of down-regulated proteins
S11	Identified and quantified phosphopeptides, phosphosites and corresponding phosphoproteins in HCC tumour and adjacent non-tumour tissues
S12	Up and down regulated phosphopeptides obtained by volcano analysis
S13	Detailed information of differential phosphopeptides after correction with the abundance of corresponding proteins
S14	Detailed information of differential phosphopeptides without the abundance of corresponding proteins
S15	GO analysis results of up-regulated phosphoproteins in HCC tumour tissues compared with non- tumour tissues
S16	GO analysis results of down-regulated phosphoproteins in HCC tumour tissues compared with non- tumour tissues
S17	KEGG pathways analysis results of up-regulated phosphoproteins
S18	KEGG pathways analysis results of down-regulated phosphoproteins

## Sheet: S1
Clinical_information
ID	Underlying liver disease	Patient ID	Gender (1:Male;2:Female)	Age(year)	Tumour Grade	Tumour MVI Grade：	Tumour size(cm)	Tumour size(cm3)
1	HepB, liver cirrhosis	NE202209080009P00501	2	59	G2	MV0	5X4X3	60
2	HepB, liver cirrhosis	NE20192904D19PK02	2	57	G3	MV2	6.5×3.0×2.5	48.75
3	HepB, liver cirrhosis	NE0D20220317319000P0052	1	51	G2-G3	MV2	7.5×5.0×4.5	1445
4	HepB, liver cirrhosis	NE20192430D19PK02	1	54	G3	MV0	5X4X4	120
5	HepB, liver cirrhosis	NED20200729030600P02	1	47	G3	MV2	6.5×6.0×5.0	195
6	HepB, liver cirrhosis	NED202209080006000P00496	1	55	G2-G3	MV1	7X4.5X4	126

## Sheet: S2
Table S2 6472 differential identified proteins between HCC tumour and non-tumour tissues
Accession	Description	Exp. q-value: Combined	Sum PEP Score	Coverage [%]	# Peptides	# PSMs	# Unique Peptides	# AAs	MW [kDa]	calc. pI	Score Sequest HT: Sequest HT	# Peptides (by Search Engine): Sequest HT	Gene Symbol	Gene ID	# Razor Peptides	Abundance Ratio: (Sample) / (Control)	Abundance Ratio Adj. P-Value: (Sample) / (Control)	Abundance Ratio Variability [%]: (Sample) / (Control)	Abundances (Grouped): Control	Abundances (Grouped): Sample	Abundances (Grouped) CV [%]: Control	Abundances (Grouped) CV [%]: Sample	# Protein Groups	Modifications
P31327	Carbamoyl-phosphate synthase [ammonia], mitochondrial OS=Homo sapiens OX=9606 GN=CPS1 PE=1 SV=2	0	2264.74	77	128	20254	126	1500	164.8	6.74	49199.6	128	CPS1	B7Z818; hsa:1373; J3KQL0; O43774; P31327; Q53TL5; Q59HF8; Q7Z5I5	2	0.276	0.0239366	117.52	193.1	6.9	40.91	137.9	1
Q09666	Neuroblast differentiation-associated protein AHNAK OS=Homo sapiens OX=9606 GN=AHNAK PE=1 SV=2	0	2242.39	70	276	13620	276	5890	628.7	6.15	27249.2	276	AHNAK	A1A586; hsa:79026; Q09666	0	1.256	0.998585	82.36	85.6	114.4	27	50.96	1
P02768	Albumin OS=Homo sapiens OX=9606 GN=ALB PE=1 SV=2	0	1962.5	92	90	22498	90	609	69.3	6.28	61814.4	90	ALB	E7ESS9; hsa:213; O95574; P02768; P04277; Q13140; Q645G4; Q68DN5; Q6UXK4; Q86YG0; Q8IUK7; Q9P157; Q9P1I7; Q9UHS3; Q9UJZ0	0	1.221	0.998585	104.78	107.9	92.1	52.35	105.37	1
P02751	Fibronectin OS=Homo sapiens OX=9606 GN=FN1 PE=1 SV=5	0	1723.28	56	105	7843	105	2477	272.2	5.5	18782	105	FN1	B7ZLF0; E9PE77; E9PG29; hsa:2335; O95609; O95610; P02751; Q14312; Q14325; Q14326; Q17RV7; Q53S27; Q564H7; Q585T2; Q59EH1; Q60FE4; Q68DP8; Q68DP9; Q68DT4; Q6LDP6; Q6MZS0; Q6MZU5; Q6N025; Q6N0A6; Q7Z391; Q86T27; Q8IVI8; Q96KP7; Q96KP8; Q96KP9; Q9H1B8; Q9HAP3; Q9UMK2	0	4.194	0.123613	114.18	34.1	165.9	97.64	75.36	1
P49327	Fatty acid synthase OS=Homo sapiens OX=9606 GN=FASN PE=1 SV=3	0	1643.42	67	124	8709	124	2511	273.3	6.44	23360	124	FASN	hsa:2194; P49327; Q13479; Q16702; Q4LE83; Q6P4U5; Q6SS02; Q969R1; Q96C68; Q96IT0	0	1.825	0.940848	95.23	76.9	123.1	33.16	79.71	1
P35579	Myosin-9 OS=Homo sapiens OX=9606 GN=MYH9 PE=1 SV=4	0	1529.53	61	136	10826	116	1960	226.4	5.6	29976.8	136	MYH9	A8K6E4; hsa:4627; O60805; P35579; Q60FE2; Q86T83	25	1.086	0.98901	60.31	99.4	100.6	31.39	33.84	1	Met-loss+Acetyl [N-Term]
Q13813	Spectrin alpha chain, non-erythrocytic 1 OS=Homo sapiens OX=9606 GN=SPTAN1 PE=1 SV=3	0	1349.77	60	135	7526	135	2472	284.4	5.35	19528	135	SPTAN1	hsa:6709; Q13186; Q13813; Q15324; Q16606; Q59EF1; Q5VXV5; Q5VXV6; Q7Z6M5; Q9P0V0	0	1.132	0.992504	61.37	93.1	106.9	14.36	39.6	1
Q01082	Spectrin beta chain, non-erythrocytic 1 OS=Homo sapiens OX=9606 GN=SPTBN1 PE=1 SV=2	0	1289.24	60	127	6338	117	2364	274.4	5.57	16196.1	127	SPTBN1	B2RP63; hsa:6711; O60837; Q01082; Q16057; Q53R99; Q59ER3; Q8IX99	10	1.172	0.993844	65.26	92.2	107.8	16.55	42.93	1
O75369	Filamin-B OS=Homo sapiens OX=9606 GN=FLNB PE=1 SV=2	0	1222.1	60	121	7592	112	2602	278	5.73	18258	121	FLNB	B2ZZ83; B2ZZ84; B2ZZ85; C9JKE6; C9JMC4; hsa:2317; O75369; Q13706; Q59EC2; Q60FE7; Q6MZJ1; Q8WXS9; Q8WXT0; Q8WXT1; Q8WXT2; Q8WXT3; Q9NRB5; Q9NT26; Q9UEV9	11	1.319	0.99383	56.88	92.4	107.6	10.24	36.39	1	Met-loss [N-Term]
P04114	Apolipoprotein B-100 OS=Homo sapiens OX=9606 GN=APOB PE=1 SV=2	0	1172.35	36	124	4297	124	4563	515.3	7.05	8643.73	124	APOB	hsa:338; O00502; P04114; P78479; P78480; P78481; Q13779; Q13785; Q13786; Q13787; Q13788; Q4ZG63; Q53QC8; Q7Z600; Q9UMN0	0	1.21	0.998585	92.46	99.8	100.2	14.68	76.11	1
Q15149	Plectin OS=Homo sapiens OX=9606 GN=PLEC PE=1 SV=3	0	1163.94	42	176	7552	171	4684	531.5	5.96	16006.6	176	PLEC	hsa:5339; Q15148; Q15149; Q16640; Q6S376; Q6S377; Q6S378; Q6S379; Q6S380; Q6S381; Q6S382; Q6S383	5	1.086	0.98901	65.93	94.3	105.7	29.51	37.98	1
P12111	Collagen alpha-3(VI) chain OS=Homo sapiens OX=9606 GN=COL6A3 PE=1 SV=5	0	1111.82	46	119	5868	119	3177	343.5	6.68	14226.4	119	COL6A3	A8MT30; B4E3U5; B7ZMJ7; E9PFQ6; E9PGQ9; hsa:1293; P12111; Q16501; Q53QF4; Q53QF6	0	0.719	0.871749	83.36	119	81	42.59	52.78	1
P69905	Hemoglobin subunit alpha OS=Homo sapiens OX=9606 GN=HBA2 PE=1 SV=2	0	1105.8	100	23	17535	23	142	15.2	8.68	48951.9	23	HBA1; HBA2	hsa:3039; hsa:3040; P01922; P69905; Q1HDT5; Q3MIF5; Q53F97; Q96KF1; Q9NYR7; Q9UCM0	0	0.664	0.787714	94.64	112.4	87.6	26.34	62.07	1	Met-loss [N-Term]; Met-loss+Acetyl [N-Term]
P98160	Basement membrane-specific heparan sulfate proteoglycan core protein OS=Homo sapiens OX=9606 GN=HSPG2 PE=1 SV=4	0	1078.79	42	104	3923	104	4391	468.5	6.51	8234.51	104	HSPG2	hsa:3339; P98160; Q16287; Q5SZI3; Q9H3V5	0	1.179	0.995883	86.68	88	112	36.25	57.79	1
Q00610	Clathrin heavy chain 1 OS=Homo sapiens OX=9606 GN=CLTC PE=1 SV=5	0	1038.25	64	90	5640	90	1675	191.5	5.69	13595.2	90	CLTC	D3DU00; hsa:1213; Q00610; Q6N0A0; Q86TF2	0	1.681	0.959595	49.45	72.5	127.5	24.54	19.78	1	Met-loss+Acetyl [N-Term]
P02787	Serotransferrin OS=Homo sapiens OX=9606 GN=TF PE=1 SV=3	0	1015.59	84	69	6636	69	698	77	7.12	16868.2	69			0	1.1	0.9904	78.86	102.6	97.4	27.63	69.29	1
P04406	Glyceraldehyde-3-phosphate dehydrogenase OS=Homo sapiens OX=9606 GN=GAPDH PE=1 SV=3	0	984.709	94	39	10074	39	335	36	8.46	23413.7	39	GAPDH	E7EUT4; hsa:2597; P00354; P04406; Q53X65	0	1.765	0.946005	76.02	84.6	115.4	13.13	49.98	1	Met-loss [N-Term]
Q9Y490	Talin-1 OS=Homo sapiens OX=9606 GN=TLN1 PE=1 SV=3	0	972.647	54	95	5803	82	2541	269.6	6.07	14435.2	95	TLN1	A6NMY0; hsa:7094; Q86YD0; Q9NZQ2; Q9UHH8; Q9UPX3; Q9Y490	12	0.918	0.961492	61.8	92.4	107.6	19.72	14.53	1
P21333	Filamin-A OS=Homo sapiens OX=9606 GN=FLNA PE=1 SV=4	0	969.937	53	105	4935	97	2647	280.6	6.06	11739.8	105	FLNA	E9KL45; hsa:2316; P21333; Q5HY53; Q5HY55; Q8NF52	2	0.448	0.302571	75.93	138.4	61.6	33.1	38.31	1
P01024	Complement C3 OS=Homo sapiens OX=9606 GN=C3 PE=1 SV=2	0	953.514	70	97	6346	97	1663	187	6.4	15147.2	97	C3	A7E236; hsa:718; P01024	0	1.209	0.998449	74.71	96.8	103.2	23.07	65.2	1
Q14204	Cytoplasmic dynein 1 heavy chain 1 OS=Homo sapiens OX=9606 GN=DYNC1H1 PE=1 SV=5	0	947.485	38	130	4210	130	4646	532.1	6.4	7874.5	130	DYNC1H1	B0I1R0; hsa:1778; Q14204; Q6DKQ7; Q8WU28; Q92814; Q9Y4G5	0	1.415	0.98901	49.08	75.8	124.2	27.76	15.67	1
P68871	Hemoglobin subunit beta OS=Homo sapiens OX=9606 GN=HBB PE=1 SV=2	0	932.477	100	30	25035	22	147	16	7.28	56081.3	30	HBB	A4GX73; B2ZUE0; hsa:3043; P02023; P68871; Q13852; Q14481; Q14510; Q45KT0; Q549N7; Q6FI08; Q6R7N2; Q8IZI1; Q9BX96; Q9UCD6; Q9UCP8; Q9UCP9	14	0.836	0.940105	84.86	108	92	22.07	62.74	1	Met-loss [N-Term]; Met-loss+Acetyl [N-Term]
P05062	Fructose-bisphosphate aldolase B OS=Homo sapiens OX=9606 GN=ALDOB PE=1 SV=2	0	861.134	85	33	7244	33	364	39.4	7.87	22278.8	33	ALDOB	hsa:229; P05062; Q13741; Q13742; Q5T7D6	0	0.314	0.0545981	112.13	171.2	28.8	50.12	103.81	1	Met-loss+Acetyl [N-Term]
Q06278	Aldehyde oxidase OS=Homo sapiens OX=9606 GN=AOX1 PE=1 SV=2	0	822.002	70	71	4120	71	1338	147.8	7.17	9319.55	71	AOX1	hsa:316; O14765; Q06278; Q53RR8; Q53TV3; Q9BYF0; Q9UPG6	0	0.928	0.964063	110.2	146.3	53.7	34.65	100.12	1
P01023	Alpha-2-macroglobulin OS=Homo sapiens OX=9606 GN=A2M PE=1 SV=3	0	814.658	54	65	4324	57	1474	163.2	6.46	9551.68	65	A2M	hsa:2; P01023; Q13677; Q59F47; Q5QTS0; Q68DN2; Q6PIY3; Q6PN97	12	1.008	0.977009	73.86	99.2	100.8	30.53	67.34	1
Q13576	Ras GTPase-activating-like protein IQGAP2 OS=Homo sapiens OX=9606 GN=IQGAP2 PE=1 SV=4	0	806.043	57	77	3488	76	1575	180.5	5.64	8043.4	77	IQGAP2	A8K4V1; B7Z8A4; hsa:10788; J3KR91; Q13576	1	0.936	0.966611	101.66	122.5	77.5	16.03	77.79	1
O43707	Alpha-actinin-4 OS=Homo sapiens OX=9606 GN=ACTN4 PE=1 SV=2	0	796.106	71	65	6102	43	911	104.8	5.44	13700.1	65	ACTN4	A4K467; D6PXK4; hsa:81; O43707; O76048	27	1.115	0.992504	74.43	96.6	103.4	21.11	42.07	1
P35580	Myosin-10 OS=Homo sapiens OX=9606 GN=MYH10 PE=1 SV=3	0	789.387	47	89	3806	66	1976	228.9	5.54	8790.2	89	MYH10	B2RWP9; D3DTS1; F8VTL3; hsa:4628; P35580; Q12989; Q149N3; Q149N4; Q16087; Q4LE45; Q6PK16; Q9BWG0	6	0.384	0.153619	76.73	151.8	48.2	35	38.82	1
P00325	All-trans-retinol dehydrogenase [NAD(+)] ADH1B OS=Homo sapiens OX=9606 GN=ADH1B PE=1 SV=3	0	788.721	91	39	6272	17	375	39.8	8.19	15868.8	39	ADH1B	A8MYN5; B4DRS9; B4DVC3; hsa:125; P00325; Q13711; Q4ZGI9; Q96KI7	12	0.217	0.00446986	122.71	192.7	7.3	50.88	127.69	1
P00450	Ceruloplasmin OS=Homo sapiens OX=9606 GN=CP PE=1 SV=1	0	778.098	68	58	1971	58	1065	122.1	5.72	5050.87	58	CP	hsa:1356; P00450; Q14063; Q2PP18; Q9UKS4	0	1.271	0.998585	88.79	96.4	103.6	20.3	137.85	1
P78527	DNA-dependent protein kinase catalytic subunit OS=Homo sapiens OX=9606 GN=PRKDC PE=1 SV=3	0	758.325	30	102	3264	102	4128	468.8	7.12	6098.49	102	PRKDC	hsa:5591; P78527; P78528; Q13327; Q13337; Q14175; Q59H99; Q7Z611; Q96SE6; Q9UME3	0	2.208	0.846055	78.29	51	149	41.91	45.71	1
P10809	60 kDa heat shock protein, mitochondrial OS=Homo sapiens OX=9606 GN=HSPD1 PE=1 SV=2	0	756.327	72	43	9932	43	573	61	5.87	29116.2	43	HSPD1	B2R5M6; B7Z712; hsa:3329; P10809; Q38L19; Q9UCR6	0	1.836	0.940848	67.59	71.3	128.7	16.75	39.78	1
P35573	Glycogen debranching enzyme OS=Homo sapiens OX=9606 GN=AGL PE=1 SV=3	0	752.818	56	70	3399	70	1532	174.7	6.76	7606.18	70	AGL	A6NCX7; A6NEK2; D3DT51; hsa:178; P35573; P78354; P78544; Q59H92; Q6AZ90; Q9UF08	0	0.367	0.123613	98.14	171.3	28.7	41.11	70.37	1
P60709	Actin, cytoplasmic 1 OS=Homo sapiens OX=9606 GN=ACTB PE=1 SV=1	0	746.911	85	40	15521	19	375	41.7	5.48	38048.8	40	ACTB	hsa:60; P02570; P60709; P70514; P99021; Q11211; Q64316; Q75MN2; Q96B34; Q96HG5	26	0.939	0.966611	65.79	105.1	94.9	25.49	35.82	1
P50440	Glycine amidinotransferase, mitochondrial OS=Homo sapiens OX=9606 GN=GATM PE=1 SV=1	0	741.821	68	29	4723	29	423	48.4	8.05	12822.4	29	GATM	B4DH99; B4DPI3; hsa:2628; P50440; Q53EQ4	0	0.827	0.938291	90.84	115.2	84.8	25.94	69.71	1
P0C0L5	Complement C4-B OS=Homo sapiens OX=9606 GN=C4B_2 PE=1 SV=2	0	740.283	50	67	3926	5	1744	192.6	7.27	10036.4	67	C4B; C4B_2	A2BHY4; hsa:100293534; hsa:721; P01028; P0C0L5; P78445; Q13160; Q13906; Q14033; Q14835; Q6U2E9; Q6U2G1; Q6U2I5; Q6U2L1; Q6U2L7; Q6U2L9; Q6U2M5; Q6VCV8; Q96SA7; Q9NPK5; Q9UIP5	70	1.386	0.992504	88.29	95.8	104.2	23.62	77.8	1
P00352	Aldehyde dehydrogenase 1A1 OS=Homo sapiens OX=9606 GN=ALDH1A1 PE=1 SV=2	0	737.083	92	47	8922	46	501	54.8	6.73	21792.8	47	ALDH1A1	hsa:216; O00768; P00352; Q5SYR1	1	0.958	0.9715	100.66	101.7	98.3	8.92	74.03	1	Met-loss+Acetyl [N-Term]
P14618	Pyruvate kinase PKM OS=Homo sapiens OX=9606 GN=PKM PE=1 SV=4	0	728.207	82	49	3367	47	531	57.9	7.84	9856.72	49	PKM	A6NFK3; B2R5N8; B3KRY0; B4DFX8; B4DUU6; hsa:5315; P14618; P14786; Q53GK4; Q96E76; Q9BWB5; Q9UCV6; Q9UPF2	2	1.976	0.911229	109.47	73.4	126.6	27.61	110.26	1	Met-loss+Acetyl [N-Term]
P07327	Alcohol dehydrogenase 1A OS=Homo sapiens OX=9606 GN=ADH1A PE=1 SV=2	0	724.104	93	36	4482	10	375	39.8	7.94	11777.5	36	ADH1A	A8K3E3; hsa:124; P07327; Q17R68	0	0.293	0.0359264	125.43	188.5	11.5	50.65	144.69	1
P0C0L4	Complement C4-A OS=Homo sapiens OX=9606 GN=C4A PE=1 SV=2	0	718.863	50	67	3786	5	1744	192.7	7.08	9559.32	67	C4A	A6H8M8; A6NHJ5; A7E2V2; B0QZR6; B0V2C8; B2RUT6; B7ZVZ6; hsa:720; hsa:721; P01028; P0C0L4; P78445; Q13160; Q13906; Q14033; Q14835; Q4LE82; Q5JNX2; Q5JQM8; Q6P4R1; Q6U2E5; Q6U2E8; Q6U2F0; Q6U2F3; Q6U2F4; Q6U2F6; Q6U2F8; Q6U2G0; Q96EG2; Q96SA8; Q9NPK5; Q9UIP5	0	1.339	0.99383	67.96	89.3	110.7	30.86	72.61	1
Q04828	Aldo-keto reductase family 1 member C1 OS=Homo sapiens OX=9606 GN=AKR1C1 PE=1 SV=1	0	713.498	91	38	3117	3	323	36.8	7.88	8146.28	38	AKR1C1	hsa:1645; P52896; Q04828; Q5SR15; Q7M4N2; Q9UCX2	53	1.407	0.989214	100.99	95.2	104.8	28.79	135.33	1	Acetyl [N-Term]
P55072	Transitional endoplasmic reticulum ATPase OS=Homo sapiens OX=9606 GN=VCP PE=1 SV=4	0	712.302	73	51	3730	51	806	89.3	5.26	9508.45	51	VCP	B2R5T8; hsa:7415; P55072; Q0V924; Q2TAI5; Q969G7; Q9UCD5	0	1.617	0.96933	69.09	83.3	116.7	16.09	48.09	1	Met-loss+Acetyl [N-Term]
P06733	Alpha-enolase OS=Homo sapiens OX=9606 GN=ENO1 PE=1 SV=2	0	705.5	88	38	7335	33	434	47.1	7.39	17812.8	38	ENO1	B2RD59; hsa:2023; P06733; P22712; Q16704; Q4TUS4; Q53FT9; Q53HR3; Q658M5; Q6GMP2; Q71V37; Q7Z3V6; Q8WU71; Q96GV1; Q9BT62; Q9UCH6; Q9UM55	7	1.674	0.961492	79.82	68.8	131.2	17.53	52.62	1
P04040	Catalase OS=Homo sapiens OX=9606 GN=CAT PE=1 SV=3	0	700.174	81	43	3337	43	527	59.7	7.39	9203.47	43	CAT	A8K6C0; B2RCZ9; D3DR07; hsa:847; P04040; Q2M1U4; Q4VXX5; Q9BWT9; Q9UC85	0	0.569	0.603019	87.95	143.8	56.2	35.07	52.29	1	Met-loss+Acetyl [N-Term]
P07900	Heat shock protein HSP 90-alpha OS=Homo sapiens OX=9606 GN=HSP90AA1 PE=1 SV=5	0	673.192	67	63	8254	37	732	84.6	5.02	19578.7	63	HSP90AA1	A8K500; B3KPJ9; hsa:3320; P07900; Q2PP14; Q5CAQ6; Q5CAQ7; Q9BVQ5	34	1.959	0.913623	56.13	59.8	140.2	28.35	18	1
P52895	Aldo-keto reductase family 1 member C2 OS=Homo sapiens OX=9606 GN=AKR1C2 PE=1 SV=3	0	669.787	80	32	3126	3	323	36.7	7.49	8366.74	32	AKR1C2	A8K2N9; B4DKR9; hsa:1646; P52895; Q14133; Q5SR16; Q7M4N1; Q96A71	0	0.629	0.73155	109.53	135.1	64.9	61.41	131.37	1	Acetyl [N-Term]
P01009	Alpha-1-antitrypsin OS=Homo sapiens OX=9606 GN=SERPINA1 PE=1 SV=3	0	668.685	83	42	3468	42	418	46.7	5.59	8597.64	42	SERPINA1	A6PX14; B2RDQ8; hsa:5265; P01009; Q0PVP5; Q13672; Q53XB8; Q5U0M1; Q7M4R2; Q86U18; Q86U19; Q96BF9; Q96ES1; Q9P1P0; Q9UCE6; Q9UCM3	0	1.681	0.959595	102.06	77	123	51.08	139.37	1
P05783	Keratin, type I cytoskeletal 18 OS=Homo sapiens OX=9606 GN=KRT18 PE=1 SV=2	0	649.162	83	38	6187	36	430	48	5.45	15604.3	38	KRT18	hsa:3875; P05783; Q53G38; Q5U0N8; Q9BW26	2	0.982	0.975438	80.17	121.8	78.2	18.75	23.99	1
Q13501	Sequestosome-1 OS=Homo sapiens OX=9606 GN=SQSTM1 PE=1 SV=1	0	641.27	89	25	2182	25	440	47.7	5.22	6305.21	25	SQSTM1	A6NFN7; B2R661; B3KUW5; hsa:8878; Q13446; Q13501; Q9BUV7; Q9BVS6; Q9UEU1	0	3.709	0.21681	122.74	82.7	117.3	34.15	157.08	1
P08319	All-trans-retinol dehydrogenase [NAD(+)] ADH4 OS=Homo sapiens OX=9606 GN=ADH4 PE=1 SV=5	0	640.741	87	32	8134	31	380	40.2	7.94	17516	32	ADH4	A8K470; B4DIE7; C9J4A9; hsa:127; P08319; Q8TCD7	0	0.083	3.16616e-07	129.28	194.1	5.9	47.32	124.05	1
P11586	C-1-tetrahydrofolate synthase, cytoplasmic OS=Homo sapiens OX=9606 GN=MTHFD1 PE=1 SV=4	0	634.958	70	48	4591	48	935	101.5	7.3	10719.3	48	MTHFD1	A0A024R652; A0A384N5Y3; B2R5Y2; G3V2B8; hsa:4522; P11586; Q86VC9; Q9BVP5	0	0.682	0.81878	93.02	138.6	61.4	23.46	71.99	1	Acetyl [N-Term]
O75891	Cytosolic 10-formyltetrahydrofolate dehydrogenase OS=Homo sapiens OX=9606 GN=ALDH1L1 PE=1 SV=2	0	629.889	75	56	3103	49	902	98.8	5.94	8246.43	56	ALDH1L1	B4DG36; E9PBX3; hsa:10840; O75891; Q68CS1; Q8TBP8	6	0.73	0.881137	88.16	158.3	41.7	45.06	93.87	1	Met-loss [N-Term]
P08238	Heat shock protein HSP 90-beta OS=Homo sapiens OX=9606 GN=HSP90AB1 PE=1 SV=4	0	624.508	70	63	8465	22	724	83.2	5.03	18650.8	63	HSP90AB1	B2R5P0; hsa:3326; P08238; Q5T9W7; Q9NQW0; Q9NTK6	21	2.578	0.665764	76.07	63.5	136.5	21.06	48.8	1	Met-loss [N-Term]
P07148	Fatty acid-binding protein, liver OS=Homo sapiens OX=9606 GN=FABP1 PE=1 SV=1	0	622.64	98	25	9522	25	127	14.2	7.18	24999.8	25	FABP1	hsa:2168; P07148	0	0.524	0.499708	130.02	169.5	30.5	45.31	187.58	1	Met-loss+Acetyl [N-Term]
P00326	Alcohol dehydrogenase 1C OS=Homo sapiens OX=9606 GN=ADH1C PE=1 SV=2	0	620.006	90	39	4551	18	375	39.8	8.29	10429.4	39	ADH1C	hsa:126; P00326; Q4PJ18; Q5WRV0; Q6LBW4; Q6NWV0; Q6NZA7	25	0.218	0.00451659	107.23	184.5	15.5	45.12	110.38	1
P30101	Protein disulfide-isomerase A3 OS=Homo sapiens OX=9606 GN=PDIA3 PE=1 SV=4	0	617.546	71	35	4353	35	505	56.7	6.35	11962.1	35	PDIA3	hsa:2923; P30101; Q13453; Q14255; Q8IYF8; Q9UMU7	0	1.17	0.99383	54.52	88.5	111.5	14.61	23.36	1
P68104	Elongation factor 1-alpha 1 OS=Homo sapiens OX=9606 GN=EEF1A1 PE=1 SV=1	0	617.343	71	23	7195	16	462	50.1	9.01	20531.5	23	EEF1A1	hsa:1915; P04719; P04720; P68104; Q6IQ15	8	1.823	0.940848	76.99	62.7	137.3	17.53	27.51	1
P00367	Glutamate dehydrogenase 1, mitochondrial OS=Homo sapiens OX=9606 GN=GLUD1 PE=1 SV=2	0	609.629	68	37	5786	14	558	61.4	7.8	13960.1	37	GLUD1	B3KV55; B4DGN5; hsa:2746; P00367; Q5TBU3	31	0.772	0.910863	108.96	145.1	54.9	33.74	103.32	1
P15924	Desmoplakin OS=Homo sapiens OX=9606 GN=DSP PE=1 SV=3	0	602.892	37	86	2559	86	2871	331.6	6.81	4444.78	86	DSP	B2RTT2; D7RX09; hsa:1832; O75993; P15924; Q14189; Q9UHN4	0	2.139	0.871749	69.52	67.1	132.9	17.54	30.23	1
P06744	Glucose-6-phosphate isomerase OS=Homo sapiens OX=9606 GN=GPI PE=1 SV=4	0	602.518	73	29	4097	29	558	63.1	8.32	11074.6	29	GPI	B4DG39; hsa:2821; P06744; Q9BRD3; Q9BSK5; Q9UHE6	0	1.463	0.984689	54.02	84.3	115.7	17.13	46.37	1	Met-loss+Acetyl [N-Term]
P11142	Heat shock cognate 71 kDa protein OS=Homo sapiens OX=9606 GN=HSPA8 PE=1 SV=1	0	598.537	71	45	6733	32	646	70.9	5.52	14394.1	45	HSPA8	hsa:3312; P11142; Q9H3R6	18	1.646	0.965732	58.94	72.2	127.8	20.82	23.15	1	Met-loss+Acetyl [N-Term]
Q02252	Methylmalonate-semialdehyde dehydrogenase [acylating], mitochondrial OS=Homo sapiens OX=9606 GN=ALDH6A1 PE=1 SV=2	0	594.886	76	35	3994	35	535	57.8	8.5	9869.94	35	ALDH6A1	B2R609; B4DFS8; hsa:4329; J3KNU8; Q02252; Q9UKM8	0	0.509	0.460217	112.53	123.2	76.8	18.04	33.47	1
Q14697	Neutral alpha-glucosidase AB OS=Homo sapiens OX=9606 GN=GANAB PE=1 SV=3	0	594.294	59	42	3758	42	944	106.8	6.14	9273.25	42	GANAB	A6NC20; hsa:23193; Q14697; Q8WTS9; Q9P0X0	0	0.927	0.963764	52.69	106.5	93.5	13.42	27.55	1
P07237	Protein disulfide-isomerase OS=Homo sapiens OX=9606 GN=P4HB PE=1 SV=3	0	594.139	81	47	6524	47	508	57.1	4.87	15832.6	47	P4HB	B2RDQ2; hsa:5034; P07237; P30037; P32079; Q15205; Q6LDE5	0	1.162	0.99383	54.53	94.9	105.1	22.95	23.52	1
P42704	Leucine-rich PPR motif-containing protein, mitochondrial OS=Homo sapiens OX=9606 GN=LRPPRC PE=1 SV=3	0	593.189	54	63	2831	63	1394	157.8	6.13	6740.59	63	LRPPRC	A0PJE3; A8K1V1; hsa:10128; P42704; Q53PC0; Q53QN7; Q6ZUD8; Q7Z7A6; Q96D84	0	1.814	0.940848	59.84	79.2	120.8	24.36	25.67	1
P54868	Hydroxymethylglutaryl-CoA synthase, mitochondrial OS=Homo sapiens OX=9606 GN=HMGCS2 PE=1 SV=1	0	591.378	73	38	4866	36	508	56.6	8.16	11715.6	38	HMGCS2	B7Z8R3; D3Y5K6; hsa:3158; P54868; Q5SZU2; Q6IBF4	2	0.527	0.509807	88.34	141.4	58.6	28.49	63.83	1
P68032	Actin, alpha cardiac muscle 1 OS=Homo sapiens OX=9606 GN=ACTC1 PE=1 SV=1	0	581.206	80	33	8102	2	377	42	5.39	17165.1	33	ACTC1	hsa:70; P04270; P68032	21	0.547	0.54877	96.78	141.4	58.6	62.01	44.28	1
O60701	UDP-glucose 6-dehydrogenase OS=Homo sapiens OX=9606 GN=UGDH PE=1 SV=1	0	579.098	78	41	2604	41	494	55	7.12	6646.04	41	UGDH	B3KUU2; B4DN25; hsa:7358; O60589; O60701	0	2.539	0.681778	74.83	60.5	139.5	17.79	47.6	1
P23141	Liver carboxylesterase 1 OS=Homo sapiens OX=9606 GN=CES1 PE=1 SV=2	0	578.056	68	40	4703	40	567	62.5	6.6	11379.6	40	CES1	A6NIM1; A8K3K8; A8K844; E9PAU8; hsa:1066; P23141; P82127; Q00015; Q13657; Q14062; Q16737; Q16788; Q549X7; Q549X8; Q86UK2; Q96EE8; Q9UC52; Q9UDG8; Q9UK77; Q9ULY2	0	0.434	0.264798	112.34	150.6	49.4	40.58	120.04	1
P46940	Ras GTPase-activating-like protein IQGAP1 OS=Homo sapiens OX=9606 GN=IQGAP1 PE=1 SV=1	0	575.501	43	52	2193	50	1657	189.1	6.48	4878.3	52	IQGAP1	A7MBM3; hsa:8826; P46940	1	0.749	0.896215	63.69	121.9	78.1	14.99	40.57	1	Met-loss+Acetyl [N-Term]
P07099	Epoxide hydrolase 1 OS=Homo sapiens OX=9606 GN=EPHX1 PE=1 SV=1	0	571.707	94	43	4116	43	455	52.9	7.25	9817.34	43	EPHX1	B2R8N0; hsa:2052; P07099; Q5VTJ6; Q9NP75; Q9NPE7; Q9NQU6; Q9NQU7; Q9NQU8; Q9NQU9; Q9NQV0; Q9NQV1; Q9NQV2	0	0.831	0.938291	98.88	124.9	75.1	30.66	79.09	1
P35749	Myosin-11 OS=Homo sapiens OX=9606 GN=MYH11 PE=1 SV=3	0	569.549	40	73	1846	56	1972	227.2	5.5	4045.65	73	MYH11	D2JYH7; hsa:4629; O00396; O94944; P35749; P78422; Q3MIV8; Q3MNF0; Q3MNF1	0	0.629	0.73155	86.92	130.3	69.7	51.94	28.2	1
P14625	Endoplasmin OS=Homo sapiens OX=9606 GN=HSP90B1 PE=1 SV=1	0	568.451	60	51	5658	49	803	92.4	4.84	12983.3	51	HSP90B1	hsa:7184; P14625; Q96A97	0	1.017	0.978845	58.09	98.5	101.5	14.09	22.02	1
P12814	Alpha-actinin-1 OS=Homo sapiens OX=9606 GN=ACTN1 PE=1 SV=2	0	552.582	65	52	5059	30	892	103	5.41	11134.9	52	ACTN1	B3V8S3; B4DHH3; B7TY16; hsa:87; P12814; Q1HE25; Q9BTN1	0	0.864	0.945498	59.16	107.9	92.1	25.3	24.62	1	Acetyl [N-Term]
Q05707	Collagen alpha-1(XIV) chain OS=Homo sapiens OX=9606 GN=COL14A1 PE=1 SV=3	0	548.52	40	58	3571	58	1796	193.4	5.3	8242.14	58	COL14A1	B2RU07; hsa:7373; O00260; O00261; O00262; Q05707; Q05708; Q5XJ18; Q96C67; Q9UDF6	0	0.416	0.219498	80.27	138.3	61.7	56.24	60.49	1
Q16851	UTP--glucose-1-phosphate uridylyltransferase OS=Homo sapiens OX=9606 GN=UGP2 PE=1 SV=5	0	548.495	80	43	3841	43	508	56.9	8.15	9880.5	43	UGP2	hsa:7360; Q07131; Q0P6K2; Q16851; Q86Y81; Q9BU15	0	0.387	0.160387	106.97	147.7	52.3	35.15	93.76	1
P13639	Elongation factor 2 OS=Homo sapiens OX=9606 GN=EEF2 PE=1 SV=4	0	541.06	61	51	3947	51	858	95.3	6.83	9436.61	51	EEF2	A0A384N6H1; B2RMP5; D6W618; hsa:1938; P13639; Q58J86	0	1.631	0.966611	62.5	74.9	125.1	15.5	38.24	1	Met-loss [N-Term]; Met-loss+Acetyl [N-Term]
P02545	Prelamin-A/C OS=Homo sapiens OX=9606 GN=LMNA PE=1 SV=1	0	533.496	66	54	4769	53	664	74.1	7.02	11773	54	LMNA	B4DI32; D3DVB0; D6RAQ3; E7EUI9; hsa:4000; P02545; P02546; Q5I6Y4; Q5I6Y6; Q5TCJ2; Q5TCJ3; Q6UYC3; Q969I8; Q96JA2	1	1.944	0.916471	78.87	65.5	134.5	45.41	45.17	1
P51659	Peroxisomal multifunctional enzyme type 2 OS=Homo sapiens OX=9606 GN=HSD17B4 PE=1 SV=3	0	532.389	64	37	3988	37	736	79.6	8.84	11177	37	HSD17B4	B4DNV1; B4DVS5; E9PB82; F5HE57; hsa:3295; P51659	0	0.683	0.821098	72.29	103.8	96.2	16.79	27.7	1
P00338	L-lactate dehydrogenase A chain OS=Homo sapiens OX=9606 GN=LDHA PE=1 SV=2	0	530.791	94	35	3240	33	332	36.7	8.27	9343.34	35	LDHA	B4DKQ2; B7Z5E3; D3DQY3; F8W819; hsa:3939; P00338; Q53G53; Q6IBM7; Q6ZNV1; Q9UDE8; Q9UDE9	3	1.462	0.984689	80.28	82.9	117.1	20.63	56.25	1	Met-loss+Acetyl [N-Term]
Q07954	Prolow-density lipoprotein receptor-related protein 1 OS=Homo sapiens OX=9606 GN=LRP1 PE=1 SV=2	0	523.912	22	68	2032	68	4544	504.3	5.39	3308.11	68	LRP1	hsa:4035; Q07954; Q2PP12; Q86SW0; Q8IVG8	0	0.917	0.961492	73.43	125.6	74.4	11.64	73.87	1
P22314	Ubiquitin-like modifier-activating enzyme 1 OS=Homo sapiens OX=9606 GN=UBA1 PE=1 SV=3	0	521.387	61	39	2304	39	1058	117.8	5.76	5806.45	39	UBA1	hsa:7317; P22314; Q5JRR8; Q96E13	0	1.17	0.99383	60.09	99.3	100.7	15	29.02	1
P08670	Vimentin OS=Homo sapiens OX=9606 GN=VIM PE=1 SV=4	0	519.464	76	44	6761	39	466	53.6	5.12	16381.4	44	VIM	B0YJC2; D3DRU4; hsa:7431; P08670; Q15867; Q15868; Q15869; Q548L2; Q6LER9; Q8N850; Q96ML2; Q9NTM3	8	0.832	0.939032	69.76	101.1	98.9	36.84	42.5	1
P11498	Pyruvate carboxylase, mitochondrial OS=Homo sapiens OX=9606 GN=PC PE=1 SV=2	0	517.126	56	47	3210	47	1178	129.6	6.84	8091.54	47	PC	B4DN00; hsa:5091; P11498; Q16705	0	0.699	0.846609	81.63	119.3	80.7	26.12	51.58	1
P80404	4-aminobutyrate aminotransferase, mitochondrial OS=Homo sapiens OX=9606 GN=ABAT PE=1 SV=3	0	515.174	73	33	2789	33	500	56.4	7.96	6213.6	33	ABAT	A8K386; hsa:18; P80404; Q16260; Q8N5W2; Q96BG2; Q99800	0	0.464	0.338391	114.13	161.6	38.4	35.55	79.33	1
P07437	Tubulin beta chain OS=Homo sapiens OX=9606 GN=TUBB PE=1 SV=2	0	508.523	74	31	6468	5	444	49.6	4.89	16823.9	31	TUBB	hsa:203068; P05218; P07437; Q8WUC1; Q9CY33	46	1.727	0.954692	58.64	66.8	133.2	29.14	22.42	1
Q92616	eIF-2-alpha kinase activator GCN1 OS=Homo sapiens OX=9606 GN=GCN1 PE=1 SV=7	0	507.829	40	82	1668	82	2671	292.5	7.43	2484.94	82	GCN1	A8KAY1; hsa:10985; O95001; O95651; Q6P2S3; Q86X65; Q8N5I5; Q8WU80; Q92616; Q99736; Q9UE60	0	1.921	0.923322	59.88	95	105	12.97	28.84	1
P62736	Actin, aortic smooth muscle OS=Homo sapiens OX=9606 GN=ACTA2 PE=1 SV=1	0	506.091	80	31	6364	1	377	42	5.39	13046.7	31	ACTA2	B2R8A4; hsa:59; P03996; P04108; P62736; Q6FI19	0	0.608	0.511039	108.73	137	63	84.63	76.16	1
P08133	Annexin A6 OS=Homo sapiens OX=9606 GN=ANXA6 PE=1 SV=3	0	505.331	73	54	2936	54	673	75.8	5.6	6825.18	54	ANXA6	B7Z8A7; D3DQH4; E9PGK1; hsa:309; P08133; Q6ZT79	0	0.627	0.728609	78.83	125.4	74.6	23.04	53.68	1
P22105	Tenascin-X OS=Homo sapiens OX=9606 GN=TNXB PE=1 SV=5	0	503.393	33	89	1478	89	4244	458.1	5.17	2717.28	89	TNXB	hsa:7148; P22105; P78530; P78531; Q08424; Q08AM0; Q08AM1; Q59GU7; Q5SQD3; Q5ST74; Q7L8Q4; Q8N4R1; Q9NPK9; Q9UC10; Q9UC11; Q9UC12; Q9UC13; Q9UMG7	0	0.519	0.488387	104.28	140.1	59.9	21.81	28.07	1
P53621	Coatomer subunit alpha OS=Homo sapiens OX=9606 GN=COPA PE=1 SV=2	0	495.121	57	55	2299	55	1224	138.3	7.66	5086.88	55	COPA	hsa:1314; P53621; Q5T201; Q8IXZ9	0	1.403	0.9904	61.25	86.2	113.8	17.45	30.12	1
P68371	Tubulin beta-4B chain OS=Homo sapiens OX=9606 GN=TUBB4B PE=1 SV=1	0	491.928	70	29	6291	1	445	49.8	4.89	16342.9	29	TUBB4B	A2BFA2; hsa:10383; P05217; P68371	4	1.46	0.984689	60.74	85.2	114.8	19.27	30.33	1
P07814	Bifunctional glutamate/proline--tRNA ligase OS=Homo sapiens OX=9606 GN=EPRS1 PE=1 SV=5	0	489.948	46	54	2106	54	1512	170.5	7.33	4438.6	54	EPRS1	A0AVA9; B9EGH3; hsa:2058; P07814; Q05BP6; Q05DF8; Q5DSM1; Q5H9S5; Q6PD57; Q86X73	0	1.945	0.916471	52.26	65.8	134.2	20.04	28.26	1
P11021	Endoplasmic reticulum chaperone BiP OS=Homo sapiens OX=9606 GN=HSPA5 PE=1 SV=2	0	487.186	50	41	5338	39	654	72.3	5.16	12718.4	41	HSPA5	B0QZ61; hsa:3309; P11021; Q2EF78; Q9NPF1; Q9UK02	0	1.469	0.984689	51.78	81.4	118.6	15.34	21.95	1
P29401	Transketolase OS=Homo sapiens OX=9606 GN=TKT PE=1 SV=3	0	485.103	68	33	2104	33	623	67.8	7.66	6561.32	33	TKT	A8K089; B4DE31; E7EPA7; hsa:7086; P29401; Q8TBA3; Q96HH3	0	2.62	0.642144	77.37	48.6	151.4	16.81	50.6	1
P27797	Calreticulin OS=Homo sapiens OX=9606 GN=CALR PE=1 SV=1	0	478.414	77	25	4785	25	417	48.1	4.44	10403.4	25	CALR	hsa:811; P27797; Q6IAT4; Q9UDG2	0	0.947	0.968009	66.34	102.4	97.6	9.62	31.4	1
P00966	Argininosuccinate synthase OS=Homo sapiens OX=9606 GN=ASS1 PE=1 SV=2	0	474.971	66	33	3281	33	412	46.5	8.02	7341.68	33	ASS1	hsa:445; P00966; Q6LDL2; Q86UZ0; Q96GT4	0	0.28	0.0262713	102.21	168.2	31.8	47.58	50.32	1
Q71U36	Tubulin alpha-1A chain OS=Homo sapiens OX=9606 GN=TUBA1A PE=1 SV=1	0	473.787	79	33	4488	1	451	50.1	5.06	11398.5	33	TUBA1A	A8K0B8; G3V1U9; hsa:7846; P04687; P05209; Q71U36	41	1.66	0.963764	67.79	70.5	129.5	28.72	24.5	1
P05091	Aldehyde dehydrogenase, mitochondrial OS=Homo sapiens OX=9606 GN=ALDH2 PE=1 SV=2	0	472.293	73	37	3737	35	517	56.3	7.05	8538.98	37	ALDH2	B4DW54; E7EUE5; hsa:217; P05091; Q03639; Q6IB13; Q6IV71	1	0.393	0.170419	92.89	127.8	72.2	41.71	31.57	1
Q13885	Tubulin beta-2A chain OS=Homo sapiens OX=9606 GN=TUBB2A PE=1 SV=1	0	470.853	69	27	5097	1	445	49.9	4.89	13364	27	TUBB2A	hsa:7280; Q13885; Q6FGZ8; Q8IWR2	8	2.127	0.873719	87.31	58.5	141.5	24.13	42.64	1
P11712	Cytochrome P450 2C9 OS=Homo sapiens OX=9606 GN=CYP2C9 PE=1 SV=3	0	467.539	70	29	1854	21	490	55.6	7.91	4373.65	29	CYP2C9	hsa:1559; P11712; P11713; Q16756; Q16872; Q5VX92; Q6IRV8; Q8WW80	8	0.21	0.00336313	114.1	187.8	12.2	42.67	108.17	1
Q9BVA1	Tubulin beta-2B chain OS=Homo sapiens OX=9606 GN=TUBB2B PE=1 SV=1	0	464.395	69	27	4996	1	445	49.9	4.89	13115.5	27	TUBB2B	A8K068; hsa:347733; Q9BVA1	0	1.049	0.958162	50.09	92.6	107.4	32.69	37.6	1
Q9NYU2	UDP-glucose:glycoprotein glucosyltransferase 1 OS=Homo sapiens OX=9606 GN=UGGT1 PE=1 SV=3	0	460.395	44	43	2185	42	1555	177.1	5.63	4857.47	43	UGGT1	hsa:56886; Q53QP2; Q53SL3; Q8IW30; Q9H8I4; Q9NYU2	2	1.546	0.975926	54.49	75.4	124.6	19.56	29.15	1
P42765	3-ketoacyl-CoA thiolase, mitochondrial OS=Homo sapiens OX=9606 GN=ACAA2 PE=1 SV=2	0	459.027	79	33	2424	33	397	41.9	8.09	6524.93	33	ACAA2	hsa:10449; P42765; Q9BUT6	0	0.224	0.00555341	101.27	172.5	27.5	22.24	93.23	1	Met-loss+Acetyl [N-Term]
P0DMV9	Heat shock 70 kDa protein 1B OS=Homo sapiens OX=9606 GN=HSPA1B PE=1 SV=1	0	453.531	69	38	4534	20	641	70	5.66	10863.8	38	HSPA1B	B4E3B6; hsa:3303; hsa:3304; P08107; P0DMV9; P19790; Q5JQI4; Q5SP17; Q9UQL9; Q9UQM0	17	2.432	0.737121	75.12	62.5	137.5	24.22	92.24	1
P29144	Tripeptidyl-peptidase 2 OS=Homo sapiens OX=9606 GN=TPP2 PE=1 SV=4	0	449.814	55	53	1311	53	1249	138.3	6.32	2175.36	53	TPP2	hsa:7174; P29144; Q5VZU8	0	1.082	0.98901	75.22	118.6	81.4	30.19	89.36	1
Q9P2E9	Ribosome-binding protein 1 OS=Homo sapiens OX=9606 GN=RRBP1 PE=1 SV=5	0	448.478	35	45	2956	45	1410	152.4	8.6	7504.99	45	RRBP1	A0A0A0MRV0; A2A2S6; A6NCN6; hsa:6238; O75300; O75301; Q5W165; Q96SB2; Q9BWP1; Q9H476; Q9P2E9	0	0.944	0.966611	72.61	104.7	95.3	13.64	48.14	1
P00558	Phosphoglycerate kinase 1 OS=Homo sapiens OX=9606 GN=PGK1 PE=1 SV=3	0	447.381	81	32	3263	32	417	44.6	8.1	8904.13	32	PGK1	A8K4W6; B7Z7A9; hsa:5230; P00558; Q5J7W1; Q6IBT6; Q8NI87	0	1.61	0.971189	59.64	77.6	122.4	10.98	37.4	1
Q7KZF4	Staphylococcal nuclease domain-containing protein 1 OS=Homo sapiens OX=9606 GN=SND1 PE=1 SV=1	0	446.707	62	47	2896	47	910	101.9	7.17	5634.72	47	SND1	hsa:27044; Q13122; Q7KZF4; Q96AG0	0	1.507	0.979539	52.48	81.1	118.9	17.05	26.86	1	Met-loss+Acetyl [N-Term]
P02042	Hemoglobin subunit delta OS=Homo sapiens OX=9606 GN=HBD PE=1 SV=2	0	446.357	97	22	15324	14	147	16	8.05	29695.6	22	HBD	hsa:3045; P02042; Q3Y5H3; Q8WXT7	0	0.818	0.93389	82.19	104.4	95.6	30.35	62	1	Met-loss [N-Term]; Met-loss+Acetyl [N-Term]
Q7Z406	Myosin-14 OS=Homo sapiens OX=9606 GN=MYH14 PE=1 SV=2	0	442.044	37	59	1755	49	1995	227.7	5.6	3601.31	59	MYH14	B0I1S2; C3TTN4; hsa:79784; Q5CZ75; Q6XYE4; Q76B62; Q7Z406; Q8WV23; Q96I22; Q9BT27; Q9BW35; Q9H882	0	1.086	0.98901	80.45	81.1	118.9	39.21	42.39	1	Met-loss+Acetyl [N-Term]
P13010	X-ray repair cross-complementing protein 5 OS=Homo sapiens OX=9606 GN=XRCC5 PE=1 SV=3	0	439.816	70	39	2300	38	732	82.7	5.81	5029.22	39	XRCC5	A8K3X5; hsa:7520; P13010; Q0Z7V0; Q4VBQ5; Q53HH7; Q7M4N0; Q9UCQ0; Q9UCQ1	1	2.049	0.896698	62.39	60	140	35	21.88	1
P16435	NADPH--cytochrome P450 reductase OS=Homo sapiens OX=9606 GN=POR PE=1 SV=2	0	439.44	60	37	2048	37	677	76.6	5.58	4671.77	37	POR	P16435; Q16455; Q197M5; Q8N181; Q9H3M8; Q9UDT3	0	0.882	0.953	79.6	114	86	13.54	47.06	1
P42330	Aldo-keto reductase family 1 member C3 OS=Homo sapiens OX=9606 GN=AKR1C3 PE=1 SV=4	0	438.831	93	33	1905	18	323	36.8	7.94	4399.74	33	AKR1C3	A8K2V0; B4DL37; hsa:8644; P42330; Q5T2L1; Q96DJ1; Q96KI8; Q99530; Q9UCX1; Q9UII3; Q9UKL9	0	4.646	0.0736953	105.91	31.1	168.9	51.51	67.37	1
Q9BQE3	Tubulin alpha-1C chain OS=Homo sapiens OX=9606 GN=TUBA1C PE=1 SV=1	0	438.486	82	33	3513	4	449	49.9	5.1	9419.66	33	TUBA1C	hsa:84790; Q9BQE3	1	2.039	0.896853	59.6	60.4	139.6	20.68	32.91	1
P02788	Lactotransferrin OS=Homo sapiens OX=9606 GN=LTF PE=1 SV=6	0	437.485	70	50	1319	50	710	78.1	8.12	2658.1	50	LTF	A8K9U8; B2MV13; B7Z4X2; E7EQH5; hsa:4057; O00756; P02788; Q16780; Q16785; Q16786; Q16789; Q5DSM0; Q8IU92; Q8IZH6; Q8TCD2; Q96KZ4; Q96KZ5; Q9H1Z3; Q9UCY5	0	0.871	0.946005	122.33	132.6	67.4	43.71	194.29	1
P34932	Heat shock 70 kDa protein 4 OS=Homo sapiens OX=9606 GN=HSPA4 PE=1 SV=4	0	436.407	63	41	1913	39	840	94.3	5.19	4818.33	41	HSPA4	hsa:3308; O95756; P34932; Q2TAL4; Q9BUK9	2	2.473	0.719534	60.6	64.6	135.4	33.14	22.25	1
P28838	Cytosol aminopeptidase OS=Homo sapiens OX=9606 GN=LAP3 PE=1 SV=3	0	435.734	70	36	2411	36	519	56.1	7.93	6016.43	36	LAP3	B3KMQ3; hsa:51056; P28838; Q6IAM6; Q6P0L6; Q9UQE3	0	0.82	0.936314	82.39	102.9	97.1	20.28	66.99	1
Q08426	Peroxisomal bifunctional enzyme OS=Homo sapiens OX=9606 GN=EHHADH PE=1 SV=3	0	434.752	64	40	2729	40	723	79.4	9.14	6598.28	40	EHHADH	A8K6Y3; B4DWG3; D3DNU0; hsa:1962; Q08426; Q58EZ5	0	0.573	0.612787	96.32	148.9	51.1	31.28	66.9	1
P04075	Fructose-bisphosphate aldolase A OS=Homo sapiens OX=9606 GN=ALDOA PE=1 SV=2	0	434.385	91	30	2935	27	364	39.4	8.09	8110.39	30	ALDOA	B4DXI7; hsa:226; P04075; Q6FH76; Q6FI10; Q96B15; Q9BWD9; Q9UCN2	5	1.891	0.929221	103.78	109.3	90.7	19.45	46.27	1	Met-loss [N-Term]
P27824	Calnexin OS=Homo sapiens OX=9606 GN=CANX PE=1 SV=2	0	431.98	45	31	2096	31	592	67.5	4.6	5496.6	31	CANX	B2R5V8; B4DGP8; B4E2T8; D3DWQ3; D6R9K3; hsa:821; P27824	0	1.471	0.984689	63.03	83.2	116.8	29.52	32.03	1
P02675	Fibrinogen beta chain OS=Homo sapiens OX=9606 GN=FGB PE=1 SV=2	0	431.751	64	33	3199	33	491	55.9	8.27	7087.87	33	FGB	A0JLR9; B2R7G3; hsa:2244; P02675; Q32Q65; Q3KPF2	0	1.219	0.998585	75.72	88.7	111.3	23.42	58.4	1
P36871	Phosphoglucomutase-1 OS=Homo sapiens OX=9606 GN=PGM1 PE=1 SV=3	0	431.232	81	37	2372	37	562	61.4	6.76	5876.25	37	PGM1	B2R5N9; B4DPV0; hsa:5236; P36871; Q16105; Q16106; Q5BKZ9; Q6NW22; Q86U74; Q96J40; Q9NTY4	0	0.423	0.237812	91.9	158.1	41.9	32.08	47.05	1
P05787	Keratin, type II cytoskeletal 8 OS=Homo sapiens OX=9606 GN=KRT8 PE=1 SV=7	0	429	78	43	5859	36	483	53.7	5.59	12334.8	43	KRT8	A8K4H3; B0AZN5; F8VXB4; hsa:3856; P05787; Q14099; Q14716; Q14717; Q53GJ0; Q6DHW5; Q6GMY0; Q6P4C7; Q96J60	5	1.238	0.999419	62.61	97.3	102.7	20.63	24.06	1
P06576	ATP synthase subunit beta, mitochondrial OS=Homo sapiens OX=9606 GN=ATP5F1B PE=1 SV=3	0	426.64	76	29	4156	29	529	56.5	5.4	10357	29	ATP5F1B	A8K4X0; hsa:506; P06576; Q14283	0	0.982	0.975438	61.69	105.3	94.7	15.95	31.57	1
P34896	Serine hydroxymethyltransferase, cytosolic OS=Homo sapiens OX=9606 GN=SHMT1 PE=1 SV=1	0	426.011	76	33	1689	32	483	53	7.71	3985.3	33	SHMT1	B4DPM9; D3DXD0; hsa:6470; P34896; Q96HY0; Q9UMD1; Q9UMD2	2	0.409	0.202055	109.56	163.7	36.3	42.9	91.67	1	Met-loss+Acetyl [N-Term]
P24752	Acetyl-CoA acetyltransferase, mitochondrial OS=Homo sapiens OX=9606 GN=ACAT1 PE=1 SV=1	0	422.539	75	25	3264	25	427	45.2	8.85	7871.49	25	ACAT1	B2R6H1; G3XAB4; hsa:38; P24752; Q96FG8	0	0.416	0.220458	97.55	147.6	52.4	30.02	94.38	1
P68366	Tubulin alpha-4A chain OS=Homo sapiens OX=9606 GN=TUBA4A PE=1 SV=1	0	421.536	71	29	3715	10	448	49.9	5.06	9054.27	29	TUBA4A	A8MUB1; B3KNQ6; hsa:7277; P05215; P68366	0	1.165	0.99383	74.97	87.7	112.3	17.89	57.04	1
Q16822	Phosphoenolpyruvate carboxykinase [GTP], mitochondrial OS=Homo sapiens OX=9606 GN=PCK2 PE=1 SV=4	0	421.508	66	37	5071	34	640	70.7	7.62	11724.9	37	PCK2	B4DW73; hsa:5106; O43253; Q16822; Q86U01; Q9BV62	4	0.295	0.0372835	108.4	175.8	24.2	35.5	79.06	1
P06737	Glycogen phosphorylase, liver form OS=Homo sapiens OX=9606 GN=PYGL PE=1 SV=4	0	418.888	57	44	2795	36	847	97.1	7.17	5907.07	44	PYGL	A6NDQ4; B4DUB7; F5H816; hsa:5836; O60567; O60752; O60913; P06737; Q501V9; Q641R5; Q96G82	10	0.459	0.326811	101.62	147.7	52.3	30.99	65.23	1	Met-loss+Acetyl [N-Term]
P00747	Plasminogen OS=Homo sapiens OX=9606 GN=PLG PE=1 SV=2	0	418.773	55	38	1475	38	810	90.5	7.24	2947.97	38	PLG	hsa:5340; P00747; Q15146; Q5TEH4; Q6PA00	0	1.384	0.992504	60.32	94	106	21.82	98.07	1
P50395	Rab GDP dissociation inhibitor beta OS=Homo sapiens OX=9606 GN=GDI2 PE=1 SV=2	0	418.749	74	38	2450	27	445	50.6	6.47	6216.83	38	GDI2	hsa:2665; O43928; P50395; Q5SX88; Q9UQM6	13	1.374	0.992504	66.85	89	111	22.88	55.65	1
P49448	Glutamate dehydrogenase 2, mitochondrial OS=Homo sapiens OX=9606 GN=GLUD2 PE=1 SV=2	0	413.343	50	29	4281	6	558	61.4	8.46	9717.65	29	GLUD2	B2R8G0; hsa:2747; P49448; Q9UDQ4	0	1.908	0.932285	99.85	67.1	132.9	37.95	125.89	1
P06396	Gelsolin OS=Homo sapiens OX=9606 GN=GSN PE=1 SV=1	0	413.018	54	28	1633	28	782	85.6	6.28	4596.21	28	GSN	A2A418; A8MUD1; A8MYN7; B7Z373; B7Z5V1; F5H1A8; hsa:2934; P06396; Q5T0I2; Q8WVV7	0	1.195	0.996481	86.91	97.6	102.4	29.63	67.08	1
Q9UI17	Dimethylglycine dehydrogenase, mitochondrial OS=Homo sapiens OX=9606 GN=DMGDH PE=1 SV=2	0	410.723	62	37	1457	37	866	96.8	7.62	3052.45	37	DMGDH	B2RBN0; B4E1J9; hsa:29958; Q9UI17	0	0.458	0.324393	84.05	160.7	39.3	36.15	67.78	1
P0DOX5	Immunoglobulin gamma-1 heavy chain OS=Homo sapiens OX=9606 PE=1 SV=2	0	410.718	54	26	3515	14	449	49.3	8.72	8901.69	26			17	1.24	0.999419	101.37	114.1	85.9	34.31	91.87	1
P04350	Tubulin beta-4A chain OS=Homo sapiens OX=9606 GN=TUBB4A PE=1 SV=2	0	408.409	65	26	5217	1	444	49.6	4.88	12885.3	26	TUBB4A	B3KQP4; hsa:10382; P04350; Q969E5	2	0.82	0.821217	61.83	115.4	84.6	34.27	57.11	1
Q9HC84	Mucin-5B OS=Homo sapiens OX=9606 GN=MUC5B PE=1 SV=3	0	406.842	20	57	448	53	5762	596	6.64	885.16	57	MUC5B	hsa:727897; O00447; O00573; O14985; O15494; O95291; O95451; Q14881; Q7M4S5; Q99552; Q9HC84; Q9UE28	4	1.455	0.984689	76.49	88	112	56.24	126.83	1
Q9Y6R7	IgGFc-binding protein OS=Homo sapiens OX=9606 GN=FCGBP PE=1 SV=3	0	406.595	23	46	254	46	5405	571.6	5.34	625.98	46	FCGBP	hsa:8857; O95784; Q9Y6R7	0	1.596	0.972752	78.93	53.6	146.4	50.93	89.52	1
P05023	Sodium/potassium-transporting ATPase subunit alpha-1 OS=Homo sapiens OX=9606 GN=ATP1A1 PE=1 SV=1	0	406.09	43	39	2427	39	1023	112.8	5.49	5325.96	39	ATP1A1	B2RBR6; B7Z2T5; B7Z3U6; F5H3A1; hsa:476; P05023; Q16689; Q6LDM4; Q9UCN1; Q9UJ20; Q9UJ21	0	1.882	0.932976	54.34	72.8	127.2	11.95	28.72	1
P38646	Stress-70 protein, mitochondrial OS=Homo sapiens OX=9606 GN=HSPA9 PE=1 SV=2	0	401.936	56	34	2507	34	679	73.6	6.16	6177.1	34	HSPA9	B2RCM1; hsa:3313; P30036; P31932; P38646; Q1HB43; Q53H23; Q6GU03; Q9BWB7; Q9UC56	0	1.775	0.945498	55.17	78.8	121.2	11.38	27.68	1
O75083	WD repeat-containing protein 1 OS=Homo sapiens OX=9606 GN=WDR1 PE=1 SV=4	0	398.771	59	28	1832	28	606	66.2	6.65	4628.16	28	WDR1	A8K6E9; A8MPU4; hsa:9948; O75083; O75313; Q8N6E5; Q9UG05; Q9UG78; Q9UQE0	0	1.162	0.99383	64.66	93.4	106.6	17.69	35.41	1
P25705	ATP synthase subunit alpha, mitochondrial OS=Homo sapiens OX=9606 GN=ATP5F1A PE=1 SV=1	0	398.531	68	34	4898	34	553	59.7	9.13	13619.7	34	ATP5F1A	A8K092; B4DY56; hsa:498; K7ENP3; P25705; Q53XX6; Q8IXV2; Q96FB4; Q96HW2; Q96IR6; Q9BTV8	0	0.908	0.957664	64.7	106.8	93.2	18.54	39.42	1
Q08AH3	Acyl-coenzyme A synthetase ACSM2A, mitochondrial OS=Homo sapiens OX=9606 GN=ACSM2A PE=1 SV=2	0	397.72	67	31	1921	9	577	64.2	8.09	4464.08	31	ACSM2A	B3KTT9; hsa:123876; O75202; Q08AH3	0	0.512	0.468231	103.48	146.9	53.1	45.78	73.58	1
Q9NSE4	Isoleucine--tRNA ligase, mitochondrial OS=Homo sapiens OX=9606 GN=IARS2 PE=1 SV=2	0	394.738	56	37	1766	37	1012	113.7	7.2	3388.27	37	IARS2	B2RPG8; hsa:55699; Q1M2P9; Q6PI85; Q7L439; Q86WU9; Q96D91; Q9H9Q8; Q9NSE4; Q9NW42	0	1.818	0.940848	61.8	66.4	133.6	11.47	29.38	1
P07355	Annexin A2 OS=Homo sapiens OX=9606 GN=ANXA2 PE=1 SV=2	0	393.232	84	38	3239	38	339	38.6	7.75	7466.87	38	ANXA2	hsa:302; P07355; Q567R4; Q6N0B3; Q8TBV2; Q96DD5; Q9UDH8	0	1.594	0.972752	82.16	71.2	128.8	36.15	56.66	1	Met-loss+Acetyl [N-Term]
P58107	Epiplakin OS=Homo sapiens OX=9606 GN=EPPK1 PE=1 SV=3	0	389.848	42	57	942	52	5088	555.3	5.62	2533.82	57	EPPK1	A0A087X1U6; hsa:83481; P58107; Q76E58; Q9NSU9	0	1.557	0.975926	67.77	78.7	121.3	19.01	77.21	1
Q68CK6	Acyl-coenzyme A synthetase ACSM2B, mitochondrial OS=Homo sapiens OX=9606 GN=ACSM2B PE=1 SV=2	0	384.716	64	33	2170	11	577	64.2	8.25	4932.12	33	ACSM2B	hsa:348158; Q68CK6; Q86YT1	26	0.332	0.0746476	99.5	170	30	42.55	93.66	1
Q01581	Hydroxymethylglutaryl-CoA synthase, cytoplasmic OS=Homo sapiens OX=9606 GN=HMGCS1 PE=1 SV=2	0	384.051	63	25	1285	23	520	57.3	5.41	3062.96	25	HMGCS1	B2RDL8; hsa:3157; Q01581	0	1.517	0.978461	103.99	110.5	89.5	32.87	109.33	1	Met-loss [N-Term]
Q00796	Sorbitol dehydrogenase OS=Homo sapiens OX=9606 GN=SORD PE=1 SV=4	0	383.989	73	28	3272	28	357	38.3	7.97	9869.13	28	SORD	B2R655; B7Z3A6; hsa:6652; J3JZZ5; Q00796; Q16682; Q9UMD6	0	0.725	0.877605	121.36	151.8	48.2	36.04	138.05	1	Met-loss+Acetyl [N-Term]
Q3LXA3	Triokinase/FMN cyclase OS=Homo sapiens OX=9606 GN=TKFC PE=1 SV=2	0	383.65	65	28	1687	28	575	58.9	7.49	5085.03	28	TKFC	hsa:26007; Q2L9C1; Q3LXA3; Q53EQ9; Q9BVA7; Q9H895	0	0.427	0.247067	105.9	164.4	35.6	47.2	108.33	1
Q99798	Aconitate hydratase, mitochondrial OS=Homo sapiens OX=9606 GN=ACO2 PE=1 SV=2	0	382.997	47	32	1777	32	780	85.4	7.61	4722.81	32	ACO2	hsa:50; O75809; Q5JZ41; Q6FHX0; Q8TAQ6; Q99798	0	0.93	0.964343	56.18	105	95	18.65	26.94	1
P02774	Vitamin D-binding protein OS=Homo sapiens OX=9606 GN=GC PE=1 SV=2	0	380.983	72	27	1386	27	474	52.9	5.45	3988.13	27	GC	B4DPP2; D6RAK8; hsa:2638; P02774; Q16309; Q16310; Q53F31; Q6GTG1	0	1.635	0.966611	92.12	75.2	124.8	33.76	110.05	1
P21399	Cytoplasmic aconitate hydratase OS=Homo sapiens OX=9606 GN=ACO1 PE=1 SV=3	0	379.803	48	34	2228	34	889	98.3	6.68	5352.72	34	ACO1	D3DRK7; hsa:48; P21399; Q14652; Q5VZA7	0	0.875	0.947874	64.69	102.2	97.8	19.42	33.18	1	Met-loss+Acetyl [N-Term]
P0DPH8	Tubulin alpha-3D chain OS=Homo sapiens OX=9606 GN=TUBA3D PE=1 SV=1	0	378.517	63	27	3304	1	450	49.9	5.1	8895.56	27	TUBA3D	A6NJQ0; hsa:113457; P0DPH8; Q13748; Q5W099; Q6PEY3; Q96F18	1	100	2.00326e-16			200		73.06	1
P40939	Trifunctional enzyme subunit alpha, mitochondrial OS=Homo sapiens OX=9606 GN=HADHA PE=1 SV=2	0	378.045	53	34	3151	34	763	82.9	9.04	7812.19	34	HADHA	B2R7L4; B4DYP2; hsa:3030; P40939; Q16679; Q53T69; Q53TA2; Q96GT7; Q9UQC5	0	0.6	0.672164	75.2	135.6	64.4	19.33	65.56	1
P48643	T-complex protein 1 subunit epsilon OS=Homo sapiens OX=9606 GN=CCT5 PE=1 SV=1	0	374.421	66	34	1908	33	541	59.6	5.66	4814.46	34	CCT5	A8JZY8; A8K2X8; B4DYD8; hsa:22948; P48643	1	2.004	0.905631	57.74	69.6	130.4	16.79	25.21	1	Met-loss+Acetyl [N-Term]
P12270	Nucleoprotein TPR OS=Homo sapiens OX=9606 GN=TPR PE=1 SV=3	0	374.309	33	56	1148	56	2363	267.1	5.02	2281.23	56	TPR	hsa:7175; P12270; Q15624; Q15655; Q5SWY0; Q99968	0	1.825	0.940848	74.17	80	120	29.57	28.02	1	Met-loss+Acetyl [N-Term]
P00505	Aspartate aminotransferase, mitochondrial OS=Homo sapiens OX=9606 GN=GOT2 PE=1 SV=3	0	374.216	71	30	3277	30	430	47.5	9.01	8250.06	30	GOT2	B4DJA6; E7ERW2; hsa:2806; P00505; Q53FL3; Q9BWA3	0	0.407	0.198731	93.72	119	81	30.28	69.75	1
O14975	Long-chain fatty acid transport protein 2 OS=Homo sapiens OX=9606 GN=SLC27A2 PE=1 SV=2	0	371.972	49	27	1330	27	620	70.3	8.51	3319.24	27	SLC27A2	A8K2J7; hsa:11001; O14975; Q53FY6; Q6PF09	0	0.674	0.806196	90.94	149.4	50.6	32.97	77.32	1
P13667	Protein disulfide-isomerase A4 OS=Homo sapiens OX=9606 GN=PDIA4 PE=1 SV=2	0	371.053	60	41	3511	41	645	72.9	5.07	7713.75	41	PDIA4	A8K4K6; hsa:9601; P13667; Q549T6	0	1.15	0.99383	56.51	94.6	105.4	12.41	28.8	1
P17516	Aldo-keto reductase family 1 member C4 OS=Homo sapiens OX=9606 GN=AKR1C4 PE=1 SV=3	0	370.701	79	26	1752	18	323	37	6.93	4875.59	26	AKR1C4	hsa:1109; P17516; Q5T6A3; Q8WW84; Q9NS54	0	0.703	0.852018	91.67	137.4	62.6	46.72	91.9	1
P02647	Apolipoprotein A-I OS=Homo sapiens OX=9606 GN=APOA1 PE=1 SV=1	0	370.624	82	37	2764	37	267	30.8	5.76	6490.79	37	APOA1	A8K866; hsa:335; P02647; Q6LDN9; Q6Q785; Q9UCS8; Q9UCT8	0	1.18	0.995993	88	89.1	110.9	18.32	45.5	1
P31513	Dimethylaniline monooxygenase [N-oxide-forming] 3 OS=Homo sapiens OX=9606 GN=FMO3 PE=1 SV=5	0	369.595	58	29	1840	28	532	60	7.78	4094.16	29	FMO3	B2R816; hsa:2328; P31513; Q14854; Q8N5N5	2	0.355	0.10535	132.19	173.2	26.8	41.4	171.01	1
P47989	Xanthine dehydrogenase/oxidase OS=Homo sapiens OX=9606 GN=XDH PE=1 SV=4	0	365.99	38	31	765	31	1333	146.3	7.66	2073.04	31	XDH	hsa:7498; P47989; Q16681; Q16712; Q4PJ16	0	0.816	0.932065	106.67	171.8	28.2	41.98	155.86	1
P30084	Enoyl-CoA hydratase, mitochondrial OS=Homo sapiens OX=9606 GN=ECHS1 PE=1 SV=4	0	364.322	78	24	3830	24	290	31.4	8.07	8010.73	24	ECHS1	hsa:1892; O00739; P30084; Q5VWY1; Q96H54	0	0.519	0.488387	81.95	135.4	64.6	28.51	43.19	1
P46939	Utrophin OS=Homo sapiens OX=9606 GN=UTRN PE=1 SV=2	0	363.523	25	61	1012	61	3433	394.2	5.33	1468.37	61	UTRN	hsa:7402; P46939; Q5SYY1; Q5SZ57; Q9UJ40	0	1.615	0.969498	72.83	72.2	127.8	33.35	46.8	1
Q13423	NAD(P) transhydrogenase, mitochondrial OS=Homo sapiens OX=9606 GN=NNT PE=1 SV=3	0	360.418	33	32	2172	32	1086	113.8	8.09	4859.55	32	NNT	hsa:23530; Q13423; Q16796; Q2TB60; Q8N3V4	0	0.483	0.389426	61.93	168.2	31.8	31.77	81.6	1
Q86UP2	Kinectin OS=Homo sapiens OX=9606 GN=KTN1 PE=1 SV=1	0	358.614	37	39	1262	39	1357	156.2	5.64	2364.35	39	KTN1	B4DZ88; hsa:3895; Q13999; Q14707; Q15387; Q17RZ5; Q5GGW3; Q86UP2; Q86W57	0	1.413	0.98901	50.42	94.5	105.5	21.07	48.88	1
Q00839	Heterogeneous nuclear ribonucleoprotein U OS=Homo sapiens OX=9606 GN=HNRNPU PE=1 SV=6	0	357.193	44	35	2297	34	825	90.5	6	5434.18	35	HNRNPU	hsa:3192; O75507; Q00839; Q8N174; Q96HY9; Q9BQ09	1	2.299	0.796835	82.45	55.1	144.9	39.31	41.05	1
P22307	Sterol carrier protein 2 OS=Homo sapiens OX=9606 GN=SCP2 PE=1 SV=2	0	355.566	75	33	2140	33	547	59	6.89	4468.45	33	SCP2	A6NM69; B4DGJ9; B4DHP6; C9JC79; D3DQ37; E1B6W5; F2Z3J1; hsa:6342; P22307; Q15432; Q16622; Q5VVZ1; Q6NXF4; Q99430	0	0.453	0.311807	87.59	143.7	56.3	33.15	27.34	1	Met-loss+Acetyl [N-Term]
P15144	Aminopeptidase N OS=Homo sapiens OX=9606 GN=ANPEP PE=1 SV=4	0	354.441	49	39	1614	39	967	109.5	5.48	3782.6	39	ANPEP	hsa:290; P15144; Q16728; Q6GT90; Q8IUK3; Q8IVH3; Q9UCE0	0	2.193	0.85119	93.77	56.8	143.2	54.61	72.92	1
Q7Z6Z7	E3 ubiquitin-protein ligase HUWE1 OS=Homo sapiens OX=9606 GN=HUWE1 PE=1 SV=3	0	353.935	22	56	736	56	4374	481.6	5.22	994.33	56	HUWE1	hsa:10075; O15029; Q4G2Z2; Q5H961; Q6P4D0; Q7Z6Z7; Q8NG67; Q9BUI0; Q9HCJ4; Q9NSL6; Q9P0A9	0	1.679	0.96078	64.74	52.9	147.1	39.01	75.43	1
P49326	Flavin-containing monooxygenase 5 OS=Homo sapiens OX=9606 GN=FMO5 PE=1 SV=2	0	353.101	68	26	1385	26	533	60.2	8.21	3353.53	26	FMO5	B2RBG1; C9JJD1; hsa:2330; P49326; Q8IV22	0	1.224	0.998585	108.86	115.2	84.8	31.51	77.92	1
P26599	Polypyrimidine tract-binding protein 1 OS=Homo sapiens OX=9606 GN=PTBP1 PE=1 SV=2	0	352.394	59	21	1769	20	557	59.6	9.16	4373.09	21	PTBP1	hsa:5725; P26599; Q9BUQ0	2	2.139	0.871749	64.38	55.5	144.5	26.78	26.11	1	Acetyl [N-Term]
P04844	Dolichyl-diphosphooligosaccharide--protein glycosyltransferase subunit 2 OS=Homo sapiens OX=9606 GN=RPN2 PE=1 SV=3	0	352.145	53	24	1354	24	631	69.2	5.69	3918.96	24	RPN2	hsa:6185; P04844; Q5JYR6; Q6IBA5; Q96E21; Q9BUQ3; Q9UBE1	0	1.124	0.992504	50.4	94.8	105.2	13.91	36.08	1
P08603	Complement factor H OS=Homo sapiens OX=9606 GN=CFH PE=1 SV=4	0	352.015	40	40	1976	37	1231	139	6.61	3957.69	40	CFH	A5PL14; hsa:3075; P08603; P78435; Q14570; Q2TAZ5; Q38G77; Q5TFM3; Q8N708; Q9NU86	3	1.295	0.996481	83.63	99.2	100.8	35.96	57.96	1
O75874	Isocitrate dehydrogenase [NADP] cytoplasmic OS=Homo sapiens OX=9606 GN=IDH1 PE=1 SV=2	0	352.014	66	30	3731	27	414	46.6	7.01	8606.92	30	IDH1	hsa:3417; O75874; Q567U4; Q6FHQ6; Q7Z3V0; Q93090; Q9NTJ9; Q9UKW8	3	1.007	0.975926	64.47	106.7	93.3	25.75	36.17	1
P18206	Vinculin OS=Homo sapiens OX=9606 GN=VCL PE=1 SV=4	0	351.657	51	47	2373	47	1134	123.7	5.66	5424.92	47	VCL	hsa:7414; P18206; Q16450; Q5SWX2; Q7Z3B8; Q8IXU7	0	0.625	0.725194	71.75	119.6	80.4	23.96	30.99	1
Q9BWD1	Acetyl-CoA acetyltransferase, cytosolic OS=Homo sapiens OX=9606 GN=ACAT2 PE=1 SV=2	0	350.89	60	14	1157	14	397	41.3	6.92	3919.7	14	ACAT2	B7Z233; E1P5B1; hsa:39; Q16146; Q5TCL7; Q8TDM4; Q9BWD1	0	1.07	0.986028	96.66	115.8	84.2	50.95	100.5	1	Met-loss [N-Term]; Acetyl [N-Term]
P22309	UDP-glucuronosyltransferase 1A1 OS=Homo sapiens OX=9606 GN=UGT1A1 PE=1 SV=1	0	349.954	40	16	1129	8	533	59.6	8	3293.68	16	UGT1A1	A6NJC3; B8K286; hsa:54658; P22309	0	0.881	0.953	92.35	117.5	82.5	51.13	120.57	1
P23378	Glycine dehydrogenase (decarboxylating), mitochondrial OS=Homo sapiens OX=9606 GN=GLDC PE=1 SV=2	0	349.589	47	35	949	35	1020	112.7	7.11	2389.86	35	GLDC	hsa:2731; P23378; Q2M2F8	0	0.521	0.49237	93.38	157.2	42.8	62.26	87.27	1
P32754	4-hydroxyphenylpyruvate dioxygenase OS=Homo sapiens OX=9606 GN=HPD PE=1 SV=2	0	348.071	75	29	1755	29	393	44.9	7.01	4309.58	29	HPD	A8K461; B3KQ63; hsa:3242; P32754; Q13234	0	0.2	0.00230256	115.01	192.6	7.4	37.86	169.09	1
P33121	Long-chain-fatty-acid--CoA ligase 1 OS=Homo sapiens OX=9606 GN=ACSL1 PE=1 SV=1	0	347.466	55	35	2141	34	698	77.9	7.15	4543.11	35	ACSL1	B7Z452; D3DP57; hsa:2180; P33121; P41215; Q8N8V7; Q8TA99	1	0.419	0.225577	105.45	162.7	37.3	37.82	69.57	1	Acetyl [N-Term]
P21980	Protein-glutamine gamma-glutamyltransferase 2 OS=Homo sapiens OX=9606 GN=TGM2 PE=1 SV=2	0	346.866	57	32	2321	32	687	77.3	5.22	5583.22	32	TGM2	E1P5V9; hsa:7052; P21980; Q16436; Q6B838; Q9BTN7; Q9H035; Q9UH35	0	1.03	0.980663	59.48	101.7	98.3	25.91	28.54	1	Met-loss+Acetyl [N-Term]
Q93088	Betaine--homocysteine S-methyltransferase 1 OS=Homo sapiens OX=9606 GN=BHMT PE=1 SV=2	0	346.711	75	32	1933	26	406	45	7.03	4671.63	32	BHMT	hsa:635; Q93088; Q9UNI9	7	0.209	0.00331657	120.2	186.4	13.6	50.83	91.77	1
Q5T2W1	Na(+)/H(+) exchange regulatory cofactor NHE-RF3 OS=Homo sapiens OX=9606 GN=PDZK1 PE=1 SV=2	0	346.582	57	23	1076	23	519	57.1	5.55	2686.2	23	PDZK1	B4DPB9; E7EU02; hsa:5174; O60450; Q5T2W1; Q5T5P6; Q9BQ41	0	2.298	0.797861	100.89	77.1	122.9	54.24	73.88	1
P11717	Cation-independent mannose-6-phosphate receptor OS=Homo sapiens OX=9606 GN=IGF2R PE=1 SV=3	0	343.821	28	42	730	42	2491	274.2	5.94	1103.85	42	IGF2R	hsa:3482; P11717; Q7Z7G9; Q96PT5	0	2.183	0.853141	63.03	54.5	145.5	51.63	45.31	1
P27708	CAD protein OS=Homo sapiens OX=9606 GN=CAD PE=1 SV=3	0	341.64	28	40	834	38	2225	242.8	6.46	1567.08	40	CAD	D6W552; hsa:790; P27708; Q6P0Q0; Q96CK3	0	2.679	0.614406	75.2	31.2	168.8	73.57	53.72	1
P49748	Very long-chain specific acyl-CoA dehydrogenase, mitochondrial OS=Homo sapiens OX=9606 GN=ACADVL PE=1 SV=1	0	338.379	51	33	2511	33	655	70.3	8.75	6197.19	33	ACADVL	B4DEB6; F5H2A9; hsa:37; O76056; P49748; Q8WUL0	0	0.543	0.538738	82.4	133.6	66.4	8.15	76.48	1
P24821	Tenascin OS=Homo sapiens OX=9606 GN=TNC PE=1 SV=3	0	337.86	30	44	1371	44	2201	240.7	4.89	2701.54	44	TNC	C9IYT7; C9J575; C9J6D9; C9J848; hsa:3371; P24821; Q14583; Q15567; Q5T7S3	0	1.47	0.984689	94.99	86.1	113.9	42.86	132.16	1
Q12906	Interleukin enhancer-binding factor 3 OS=Homo sapiens OX=9606 GN=ILF3 PE=1 SV=3	0	337.441	52	30	1769	26	894	95.3	8.76	4001.19	30	ILF3	A8K6F2; G5E9M5; hsa:3609; O43409; Q12906; Q6P1X1; Q86XY7; Q99544; Q99545; Q9BZH4; Q9BZH5; Q9NQ95; Q9NQ96; Q9NQ97; Q9NQ98; Q9NQ99; Q9NQA0; Q9NQA1; Q9NQA2; Q9NRN2; Q9NRN3; Q9NRN4; Q9UMZ9; Q9UN00; Q9UN84; Q9UNA2	4	1.797	0.941268	80.78	66.3	133.7	33.61	33.21	1
P30038	Delta-1-pyrroline-5-carboxylate dehydrogenase, mitochondrial OS=Homo sapiens OX=9606 GN=ALDH4A1 PE=1 SV=3	0	334.472	64	27	2133	27	563	61.7	8.07	5359.64	27	ALDH4A1	A8K1Q7; B4DGE4; D2D4A3; hsa:8659; P30038; Q16882; Q53HU4; Q5JNV6; Q8IZ38; Q96IF0; Q9UDI6	0	0.384	0.153211	78.61	153.6	46.4	24.93	53.36	1
P26640	Valine--tRNA ligase OS=Homo sapiens OX=9606 GN=VARS1 PE=1 SV=4	0	334.314	48	42	1667	42	1264	140.4	7.59	3388.46	42	VARS1	B0V1N1; B4DZ61; hsa:7407; P26640; Q5JQ90; Q96E77; Q9UQM2	0	2.211	0.843779	60.23	57.3	142.7	44.61	33.37	1	Met-loss+Acetyl [N-Term]
P17174	Aspartate aminotransferase, cytoplasmic OS=Homo sapiens OX=9606 GN=GOT1 PE=1 SV=3	0	328.835	71	23	1844	23	413	46.2	7.01	4556.08	23	GOT1	B2R6R7; B7Z7E9; hsa:2805; P17174; Q5VW80	0	0.678	0.813648	78.22	130	70	26.66	58.94	1	Met-loss [N-Term]
P01031	Complement C5 OS=Homo sapiens OX=9606 GN=C5 PE=1 SV=4	0	328.788	35	40	935	40	1676	188.2	6.52	1731.69	40	C5	hsa:727; P01031; Q14CJ0; Q27I61	0	1.678	0.961162	62.12	69.2	130.8	28.35	58.54	1
Q14764	Major vault protein OS=Homo sapiens OX=9606 GN=MVP PE=1 SV=4	0	324.642	45	31	1133	31	893	99.3	5.48	2634.17	31	MVP	hsa:9961; Q14764; Q96BG4; Q9BPW6; Q9BQT1; Q9UBD1	0	1.757	0.947874	110.4	96.2	103.8	23.79	46.6	1	Met-loss+Acetyl [N-Term]
Q00341	Vigilin OS=Homo sapiens OX=9606 GN=HDLBP PE=1 SV=2	0	323.944	42	41	2123	41	1268	141.4	6.87	4128.78	41	HDLBP	B4DTQ2; E7EM71; hsa:3069; Q00341; Q53QU2; Q9UCY3	0	1.411	0.98917	49.05	78.6	121.4	11.69	22.74	1
Q13228	Methanethiol oxidase OS=Homo sapiens OX=9606 GN=SELENBP1 PE=1 SV=2	0	322.817	82	35	3082	35	472	52.4	6.37	7916.83	35	SELENBP1	A6NML9; A6PVW9; B2RDR3; B4DKP6; B4E1F3; hsa:8991; Q13228; Q49AQ8; Q96GX7	0	0.698	0.846188	68.68	101.5	98.5	11.04	34.08	1
P30086	Phosphatidylethanolamine-binding protein 1 OS=Homo sapiens OX=9606 GN=PEBP1 PE=1 SV=3	0	321.956	94	18	2937	18	187	21	7.53	8321.15	18	PEBP1	B2R4S1; hsa:5037; P30086	0	0.571	0.607794	97.87	137.9	62.1	25.23	87.1	1	Met-loss [N-Term]
P27816	Microtubule-associated protein 4 OS=Homo sapiens OX=9606 GN=MAP4 PE=1 SV=3	0	321.956	50	37	1397	37	1152	120.9	5.43	2465.58	37	MAP4	hsa:4134; P27816; Q13082; Q59FT2; Q68D74; Q6ZUW9; Q86V26; Q96A76; Q96NS9	0	1.511	0.978845	75.55	66.7	133.3	51.34	62.08	1	Met-loss+Acetyl [N-Term]
Q9HBL0	Tensin-1 OS=Homo sapiens OX=9606 GN=TNS1 PE=1 SV=2	0	321.509	42	42	834	41	1735	185.6	7.75	1332.83	42			1	0.678	0.812594	70.23	129.1	70.9	39.89	48.45	1
P31939	Bifunctional purine biosynthesis protein ATIC OS=Homo sapiens OX=9606 GN=ATIC PE=1 SV=3	0	321.099	77	36	1662	36	592	64.6	6.71	3363.06	36	ATIC	A8K202; E9PBU3; hsa:471; P31939; Q13856; Q53S28	0	2.473	0.719534	52.31	53	147	13.03	28.53	1	Met-loss [N-Term]
P52272	Heterogeneous nuclear ribonucleoprotein M OS=Homo sapiens OX=9606 GN=HNRNPM PE=1 SV=3	0	320.996	51	28	2694	28	730	77.5	8.7	5618.89	28	HNRNPM	hsa:4670; P52272; Q15584; Q8WZ44; Q96H56; Q9BWL9; Q9Y492	0	2.154	0.869013	64.25	58.3	141.7	39.25	28.57	1	Met-loss+Acetyl [N-Term]
Q9UBQ7	Glyoxylate reductase/hydroxypyruvate reductase OS=Homo sapiens OX=9606 GN=GRHPR PE=1 SV=1	0	320.325	75	25	2289	25	328	35.6	7.39	6288.98	25	GRHPR	hsa:9380; Q5T945; Q9H3E9; Q9H636; Q9UBQ7; Q9UKX1	0	0.455	0.316652	103.07	163	37	36.27	80.29	1
Q13200	26S proteasome non-ATPase regulatory subunit 2 OS=Homo sapiens OX=9606 GN=PSMD2 PE=1 SV=3	0	319.746	52	33	1146	33	908	100.1	5.2	2669.43	33	PSMD2	B4DX07; B4DXY1; E7EW34; E9PCS3; hsa:5708; Q12932; Q13200; Q15321; Q53XQ4; Q96I12	0	1.497	0.980663	42.73	74.9	125.1	9.87	26.69	1	Acetyl [N-Term]
P22310	UDP-glucuronosyltransferase 1A4 OS=Homo sapiens OX=9606 GN=UGT1A4 PE=1 SV=1	0	319.657	43	20	1025	11	534	60	8.54	2900.71	20	UGT1A4	B2R937; B8K288; hsa:54657; P22310; Q5DT00	1	0.84	0.940848	74.31	138.2	61.8	26.43	67.07	1
P19224	UDP-glucuronosyltransferase 1-6 OS=Homo sapiens OX=9606 GN=UGT1A6 PE=1 SV=2	0	315.607	42	20	1148	12	532	60.7	8.41	3070.28	20	UGT1A6	A6NKK6; B8K289; hsa:54578; P19224; Q96TE7	17	1.427	0.98865	96.73	94.6	105.4	42.81	67.5	1
P00441	Superoxide dismutase [Cu-Zn] OS=Homo sapiens OX=9606 GN=SOD1 PE=1 SV=2	0	315.403	91	14	2504	14	154	15.9	6.13	10268.1	14	SOD1	A6NHJ0; D3DSE4; hsa:6647; P00441; Q16669; Q16711; Q16838; Q16839; Q16840; Q6NR85	0	0.646	0.76002	82.89	120.3	79.7	33.75	44.92	1
Q9HC35	Echinoderm microtubule-associated protein-like 4 OS=Homo sapiens OX=9606 GN=EML4 PE=1 SV=3	0	315.304	47	41	1906	41	981	108.8	6.4	3674.8	41	EML4	A6H8Y6; A6P4T4; A6P4V4; B2RBK3; B2RTW7; B5MCW9; hsa:27436; Q3SWW0; Q53R29; Q53TW8; Q6PJ45; Q9HC35; Q9NV40	0	1.669	0.962959	69.11	61.8	138.2	20.17	46.55	1
P12110	Collagen alpha-2(VI) chain OS=Homo sapiens OX=9606 GN=COL6A2 PE=1 SV=4	0	314.433	30	26	1326	26	1019	108.5	6.21	2698.06	26	COL6A2	hsa:1292; P12110; Q13909; Q13910; Q13911; Q14048; Q14049; Q16259; Q16597; Q6P0Q1; Q9UML3; Q9Y4S8	0	0.82	0.936314	84.78	87.8	112.2	35.73	44.17	1
Q92614	Unconventional myosin-XVIIIa OS=Homo sapiens OX=9606 GN=MYO18A PE=1 SV=3	0	313.664	31	48	719	48	2054	233	6.3	1122.71	48	MYO18A	hsa:399687; Q5H9U3; Q5QD01; Q5W9F9; Q5W9G1; Q8IXP8; Q92614	0	1.081	0.98865	68.73	103.2	96.8	29.43	27.28	1
Q10567	AP-1 complex subunit beta-1 OS=Homo sapiens OX=9606 GN=AP1B1 PE=1 SV=3	0	313.008	50	31	1248	19	949	104.5	5.06	2270.66	31	AP1B1	C9JRD1; F8WDL0; hsa:162; P78436; Q10567; Q20WL3; Q86X54	0	1.135	0.992504	46.53	99.9	100.1	18.21	40.79	1
P49419	Alpha-aminoadipic semialdehyde dehydrogenase OS=Homo sapiens OX=9606 GN=ALDH7A1 PE=1 SV=5	0	311.963	52	20	1916	20	539	58.5	7.99	5250.6	20	ALDH7A1	B2R669; B4DIC7; B4DMA0; E7EPT3; hsa:501; O14619; P49419; Q6IPU8; Q9BUL4	0	0.581	0.628548	83.3	121.6	78.4	25.25	66.95	1
P13797	Plastin-3 OS=Homo sapiens OX=9606 GN=PLS3 PE=1 SV=4	0	311.737	56	28	1652	19	630	70.8	5.6	3593.01	28	PLS3	A8K579; B1AQ09; B4DGB4; B7Z6M1; hsa:5358; P13797; Q86YI6	2	0.723	0.873719	58.49	124.4	75.6	11.5	35.6	1
P05089	Arginase-1 OS=Homo sapiens OX=9606 GN=ARG1 PE=1 SV=2	0	311.492	78	19	2518	19	322	34.7	7.21	6328.19	19	ARG1	A6NEA0; hsa:383; P05089; Q5JWT5; Q5JWT6; Q8TE72; Q9BS50	0	0.356	0.10704	102.31	164.4	35.6	34.87	76.26	1
P07954	Fumarate hydratase, mitochondrial OS=Homo sapiens OX=9606 GN=FH PE=1 SV=3	0	311.08	62	22	2025	22	510	54.6	8.76	4849.29	22	FH	B1ANK7; hsa:2271; P07954	0	0.854	0.940848	71.63	113.7	86.3	13.32	43.46	1
Q08211	ATP-dependent RNA helicase A OS=Homo sapiens OX=9606 GN=DHX9 PE=1 SV=4	0	310.646	47	39	1691	39	1270	140.9	6.84	3557.41	39	DHX9	B2RNV4; hsa:1660; Q05CI5; Q08211; Q12803; Q32Q22; Q5VY62; Q6PD69; Q99556	0	2.148	0.86941	74.56	75.6	124.4	12.14	43.94	1
O95954	Formimidoyltransferase-cyclodeaminase OS=Homo sapiens OX=9606 GN=FTCD PE=1 SV=2	0	308.665	70	30	1954	30	541	58.9	5.74	5708.34	30	FTCD	B9EGD0; hsa:10841; O95954; Q86V03; Q9HCT4; Q9HCT5; Q9HCT6; Q9UHJ2	0	0.185	0.00121319	126.76	183.3	16.7	35.16	141.23	1
Q5JRA6	Transport and Golgi organization protein 1 homolog OS=Homo sapiens OX=9606 GN=MIA3 PE=1 SV=1	0	308.593	30	35	886	35	1907	213.6	4.84	1670.16	35	MIA3	A8K2S0; A8MT05; A8MT13; B7Z430; hsa:375056; Q14083; Q3S4X3; Q5JRA5; Q5JRA6; Q5JRB0; Q5JRB1; Q5JRB2; Q6UVY8; Q86Y60; Q8N8M5; Q92580	0	1.251	0.998585	51.33	96.8	103.2	22.17	33.83	1
P34913	Bifunctional epoxide hydrolase 2 OS=Homo sapiens OX=9606 GN=EPHX2 PE=1 SV=2	0	308.077	68	28	1146	28	555	62.6	6.28	2715.14	28	EPHX2	B2Z3B1; B3KTU8; B3KUA0; G3V134; hsa:2053; J3KPH7; P34913; Q16764; Q9HBJ1; Q9HBJ2	0	0.764	0.902141	98.95	142.8	57.2	44.89	89.51	1
Q99832	T-complex protein 1 subunit eta OS=Homo sapiens OX=9606 GN=CCT7 PE=1 SV=2	0	306.545	71	31	1840	31	543	59.3	7.65	3808.61	31	CCT7	A8K7E6; A8MWI8; B7WNW9; B7Z4T9; B7Z4Z7; hsa:10574; O14871; Q6FI26; Q99832	0	1.973	0.911229	55.29	68.7	131.3	8.89	27.93	1	Met-loss [N-Term]; Acetyl [N-Term]
P00751	Complement factor B OS=Homo sapiens OX=9606 GN=CFB PE=1 SV=2	0	305.41	51	29	1352	29	764	85.5	7.06	3407.47	29	CFB	B0QZQ6; hsa:629; O15006; P00751; Q29944; Q53F89; Q5JP67; Q5ST50; Q96HX6; Q9BTF5; Q9BX92	0	1.315	0.99383	60.94	87.2	112.8	13.74	50.52	1
Q9BPW8	Protein NipSnap homolog 1 OS=Homo sapiens OX=9606 GN=NIPSNAP1 PE=1 SV=1	0	304.369	59	12	1354	12	284	33.3	9.31	4069.98	12	NIPSNAP1	B2RAY3; hsa:8508; O43800; Q9BPW8	0	1.292	0.996481	83.71	82.8	117.2	26.3	50.3	1
P55084	Trifunctional enzyme subunit beta, mitochondrial OS=Homo sapiens OX=9606 GN=HADHB PE=1 SV=3	0	304.242	67	28	2108	28	474	51.3	9.41	5182.87	28	HADHB	B2RB16; B4E2W0; hsa:3032; O14969; P55084; Q53TA6; Q96C77; Q9H3F5; Q9T2V8	0	0.616	0.707792	81.57	136.5	63.5	21.15	54.13	1
P49368	T-complex protein 1 subunit gamma OS=Homo sapiens OX=9606 GN=CCT3 PE=1 SV=4	0	302.532	62	30	2008	30	545	60.5	6.49	4722.41	30	CCT3	A6NE14; hsa:7203; P49368; Q5SZY1; Q9BR64	0	2.101	0.8812	52.77	70.6	129.4	26.77	25.11	1
P31040	Succinate dehydrogenase [ubiquinone] flavoprotein subunit, mitochondrial OS=Homo sapiens OX=9606 GN=SDHA PE=1 SV=2	0	302.259	55	24	1905	24	664	72.6	7.39	4760	24	SDHA	A8K5J6; B4DJ60; E9PBJ5; hsa:6389; P31040; Q16395; Q59GW8; Q8IW48; Q9UMY5	0	0.658	0.777586	67.56	122.5	77.5	22.89	41.03	1
P00918	Carbonic anhydrase 2 OS=Homo sapiens OX=9606 GN=CA2 PE=1 SV=2	0	302.224	71	17	1252	17	260	29.2	7.4	3149.55	17	CA2	B2R7G8; hsa:760; P00918; Q6FI12; Q96ET9	0	0.384	0.153559	87.24	130.2	69.8	26.18	37.56	1
P13796	Plastin-2 OS=Homo sapiens OX=9606 GN=LCP1 PE=1 SV=6	0	301.801	68	33	2238	25	627	70.2	5.43	4564.57	33	LCP1	B2R613; B4DUA0; hsa:3936; P13796; Q5TBN4	13	0.572	0.611071	80.21	112.4	87.6	20.02	47.82	1
P55157	Microsomal triglyceride transfer protein large subunit OS=Homo sapiens OX=9606 GN=MTTP PE=1 SV=1	0	301.733	46	37	2050	37	894	99.3	8.41	4453.31	37	MTTP	A8K428; hsa:4547; P55157; Q08AM4; Q6P5T3	0	0.62	0.715559	84.86	108.5	91.5	13.47	33.14	1
P02790	Hemopexin OS=Homo sapiens OX=9606 GN=HPX PE=1 SV=2	0	301.548	61	26	1983	26	462	51.6	7.02	4608.04	26	HPX	B2R957; hsa:3263; P02790	0	1.356	0.992504	77.49	90.1	109.9	29.81	44.72	1
P19338	Nucleolin OS=Homo sapiens OX=9606 GN=NCL PE=1 SV=3	0	300.678	47	30	2081	30	710	76.6	4.7	4959.34	30	NCL	hsa:4691; P19338; Q53SK1; Q8NB06; Q9UCF0; Q9UDG1	0	2.935	0.500509	59.18	45.4	154.6	33.1	15.81	1
Q9UL12	Sarcosine dehydrogenase, mitochondrial OS=Homo sapiens OX=9606 GN=SARDH PE=1 SV=1	0	299.923	56	29	1091	29	918	101	7.25	2778.52	29	SARDH	B2RMR5; B4DPI2; B7ZLT6; hsa:1757; Q5SYV0; Q9UL12; Q9Y280; Q9Y2Y3	0	0.718	0.87122	96.62	140.9	59.1	38.58	96.57	1
P21964	Catechol O-methyltransferase OS=Homo sapiens OX=9606 GN=COMT PE=1 SV=2	0	298.644	74	18	967	18	271	30	5.47	2718.44	18	COMT	A8MPV9; hsa:1312; P21964; Q6IB07; Q6ICE6; Q9BWC7	0	0.791	0.916693	105.64	135.1	64.9	16.58	83.13	1
P06748	Nucleophosmin OS=Homo sapiens OX=9606 GN=NPM1 PE=1 SV=2	0	298.524	68	13	1524	13	294	32.6	4.78	4428.18	13	NPM1	A8K3N7; B5BU00; D3DQL6; hsa:4869; P06748; P08693; Q12826; Q13440; Q13441; Q14115; Q5EU94; Q5EU95; Q5EU96; Q5EU97; Q5EU98; Q5EU99; Q6V962; Q8WTW5; Q96AT6; Q96DC4; Q96EA5; Q9BYG9; Q9UDJ7	0	2.817	0.548177	60.56	50.3	149.7	24.92	29.21	1	Acetyl [N-Term]
O60218	Aldo-keto reductase family 1 member B10 OS=Homo sapiens OX=9606 GN=AKR1B10 PE=1 SV=2	0	297.931	82	26	1316	26	316	36	7.84	3096.71	26	AKR1B10	A4D1P1; hsa:57016; O60218; O75890; Q6FHF3; Q8IWZ1	0	4.174	0.126611	121.28	11.9	188.1	106.05	73.34	1	Met-loss+Acetyl [N-Term]
Q9HCC0	Methylcrotonoyl-CoA carboxylase beta chain, mitochondrial OS=Homo sapiens OX=9606 GN=MCCC2 PE=1 SV=1	0	297.793	51	26	1401	26	563	61.3	7.68	3266.05	26	MCCC2	A6NIY9; hsa:64087; Q96C27; Q9HCC0; Q9Y4L7	0	0.618	0.709369	76.17	137.5	62.5	21.82	47.62	1
P26038	Moesin OS=Homo sapiens OX=9606 GN=MSN PE=1 SV=3	0	296.983	55	38	2198	27	577	67.8	6.4	5674.38	38	MSN	hsa:4478; P26038	10	0.78	0.911229	59.53	116.7	83.3	26.71	34	1
O00763	Acetyl-CoA carboxylase 2 OS=Homo sapiens OX=9606 GN=ACACB PE=1 SV=3	0	295.732	27	39	677	31	2458	276.4	6.49	1088.57	39	ACACB	A6NK36; hsa:32; O00763; Q16852; Q1HEC1; Q6KE87; Q6KE89; Q6TY48	0	0.898	0.956013	69.9	141.5	58.5	48.69	72.92	1
O75533	Splicing factor 3B subunit 1 OS=Homo sapiens OX=9606 GN=SF3B1 PE=1 SV=3	0	295.521	41	35	1193	35	1304	145.7	7.09	1914.68	35	SF3B1	E9PCH3; hsa:23451; O75533	0	2.373	0.76002	61.08	44.8	155.2	86.71	48.05	1
O75643	U5 small nuclear ribonucleoprotein 200 kDa helicase OS=Homo sapiens OX=9606 GN=SNRNP200 PE=1 SV=2	0	295.466	28	45	890	45	2136	244.4	6.06	1557.83	45	SNRNP200	hsa:23020; O75643; O94884; Q6NZY0; Q6PX59; Q8NBE6; Q96IF2; Q9H7S0	0	2.024	0.897618	68.41	75.9	124.1	18.93	17.57	1
Q7Z4W1	L-xylulose reductase OS=Homo sapiens OX=9606 GN=DCXR PE=1 SV=2	0	294.577	84	21	2070	21	244	25.9	8.1	4172.96	21	DCXR	hsa:51181; Q7Z4W1; Q9BTZ3; Q9UHY9	0	0.415	0.218245	99.33	170.6	29.4	35.93	113.1	1	Acetyl [N-Term]
Q9Y4F1	FERM, ARHGEF and pleckstrin domain-containing protein 1 OS=Homo sapiens OX=9606 GN=FARP1 PE=1 SV=1	0	293.782	39	24	331	24	1045	118.6	8.15	608.63	24	FARP1	hsa:10160; Q5JVI9; Q6IQ29; Q9Y4F1	0	1.262	0.998585	91.41	102.3	97.7	21.43	112.11	1	Met-loss+Acetyl [N-Term]
P09110	3-ketoacyl-CoA thiolase, peroxisomal OS=Homo sapiens OX=9606 GN=ACAA1 PE=1 SV=2	0	293.278	66	23	1510	23	424	44.3	8.44	4075.32	23	ACAA1	G5E935; hsa:30; P09110; Q96CA6	0	0.391	0.166524	84.6	156.9	43.1	39.12	58.87	1
P20810	Calpastatin OS=Homo sapiens OX=9606 GN=CAST PE=1 SV=4	0	293.102	50	23	1037	23	708	76.5	5.07	2429.57	23	CAST	B7Z468; G5E946; G5E9D3; hsa:831; O95360; P20810; Q05DE8; Q7Z4K0; Q96D08; Q9H1Z5	0	1.098	0.9904	59.55	89.4	110.6	31.65	51.87	1
Q99714	3-hydroxyacyl-CoA dehydrogenase type-2 OS=Homo sapiens OX=9606 GN=HSD17B10 PE=1 SV=3	0	292.711	77	14	1316	14	261	26.9	7.78	3848.31	14	HSD17B10	hsa:3028; Q5H927; Q6IBS9; Q8TCV9; Q96HD5; Q99714	0	0.645	0.759802	60.11	128.7	71.3	21.74	18.34	1
Q15084	Protein disulfide-isomerase A6 OS=Homo sapiens OX=9606 GN=PDIA6 PE=1 SV=1	0	292.374	62	22	2940	22	440	48.1	5.08	8282.7	22	PDIA6	B3KY95; B5MCQ5; B7Z254; B7Z4M8; F8WA83; hsa:10130; Q15084; Q53RC7; Q6ZSH5; Q99778	0	1.062	0.984689	60.56	95.6	104.4	12.14	30.59	1
P04179	Superoxide dismutase [Mn], mitochondrial OS=Homo sapiens OX=9606 GN=SOD2 PE=1 SV=3	0	291.086	86	15	1937	15	222	24.7	8.25	4787.12	15	SOD2	B2R7R1; B3KUK2; B4DL20; B4E3K9; E1P5A9; hsa:6648; P04179; P78434; Q16792; Q5TCM1; Q96EE6; Q9P2Z3	0	0.765	0.902921	78.11	103.3	96.7	33.51	51.15	1
P45954	Short/branched chain specific acyl-CoA dehydrogenase, mitochondrial OS=Homo sapiens OX=9606 GN=ACADSB PE=1 SV=1	0	288.22	68	27	1778	27	432	47.5	6.99	4643.54	27	ACADSB	B4DQ51; hsa:36; P45954; Q5SQN6; Q96CX7	0	0.525	0.501995	94.03	135.2	64.8	23.61	66.67	1
P16930	Fumarylacetoacetase OS=Homo sapiens OX=9606 GN=FAH PE=1 SV=2	0	287.555	77	23	1441	23	419	46.3	6.95	3912.32	23	FAH	B2R9X1; D3DW95; hsa:2184; P16930; Q53XA7	0	0.627	0.728728	82.88	134	66	31.5	54.83	1	Met-loss+Acetyl [N-Term]
P02671	Fibrinogen alpha chain OS=Homo sapiens OX=9606 GN=FGA PE=1 SV=2	0	287.31	37	33	1967	33	866	94.9	6.01	3831.22	33	FGA	A8K3E4; D3DP14; D3DP15; hsa:2243; P02671; Q4QQH7; Q9BX62; Q9UCH2	0	1.05	0.984689	81.3	89.4	110.6	27.45	56.37	1
P00480	Ornithine transcarbamylase, mitochondrial OS=Homo sapiens OX=9606 GN=OTC PE=1 SV=3	0	286.938	78	24	1815	24	354	39.9	8.63	4732.8	24	OTC	A8K9P2; D3DWB0; hsa:5009; P00480; Q3KNR1; Q6B0I1; Q9NYJ5	0	0.446	0.295588	88.87	142.1	57.9	26.52	36.57	1
P07858	Cathepsin B OS=Homo sapiens OX=9606 GN=CTSB PE=1 SV=3	0	286.275	51	17	1683	17	339	37.8	6.3	4776.05	17	CTSB	B3KQR5; B3KRR5; hsa:1508; P07858; Q503A6; Q96D87	0	1.11	0.992504	90.38	83.9	116.1	21.26	48.75	1
Q4G0N4	NAD kinase 2, mitochondrial OS=Homo sapiens OX=9606 GN=NADK2 PE=1 SV=2	0	286.16	42	20	1509	20	442	49.4	8.18	3237.72	20	NADK2	B5MC93; hsa:133686; Q4G0N4; Q6UTX5; Q96NM0	0	0.9	0.956267	106.01	124.2	75.8	24.36	109.26	1
P30837	Aldehyde dehydrogenase X, mitochondrial OS=Homo sapiens OX=9606 GN=ALDH1B1 PE=1 SV=4	0	286.037	55	21	1455	20	517	57.2	6.99	3391.36	21	ALDH1B1	B2R8F0; hsa:219; P30837; Q8WX76; Q9BV45	1	0.626	0.727684	78.56	137.1	62.9	43.67	44.37	1
P53618	Coatomer subunit beta OS=Homo sapiens OX=9606 GN=COPB1 PE=1 SV=3	0	285.619	43	29	1252	29	953	107.1	6.05	2869.05	29	COPB1	D3DQX0; hsa:1315; P53618; Q6GTT7; Q9NTK2; Q9UNW7	0	1.427	0.98865	57.08	80.7	119.3	24.3	35.57	1	Met-loss+Acetyl [N-Term]
P05165	Propionyl-CoA carboxylase alpha chain, mitochondrial OS=Homo sapiens OX=9606 GN=PCCA PE=1 SV=4	0	284.988	51	31	1141	31	728	80	7.52	2738.78	31	PCCA	B4DKY8; B4DPF9; C9JPQ8; hsa:5095; P05165; Q15979; Q8WXQ7	0	0.478	0.377796	120.34	167.2	32.8	27.78	176.1	1
P61978	Heterogeneous nuclear ribonucleoprotein K OS=Homo sapiens OX=9606 GN=HNRNPK PE=1 SV=1	0	284.653	58	25	2501	25	463	50.9	5.54	5055.88	25	HNRNPK	hsa:3190; P61978; Q07244; Q15671; Q59F98; Q5T6W4; Q60577; Q6IBN1; Q922Y7; Q96J62	0	2.16	0.864252	70.71	58.6	141.4	35.12	32.12	1	Acetyl [N-Term]
Q15067	Peroxisomal acyl-coenzyme A oxidase 1 OS=Homo sapiens OX=9606 GN=ACOX1 PE=1 SV=3	0	284.535	69	27	1265	27	660	74.4	8.16	3383.33	27	ACOX1	A8K6X8; A8KAA0; B4DK61; F5GYQ8; hsa:51; Q12863; Q15067; Q15068; Q15101; Q16131; Q7Z3W5; Q9UD31	0	0.755	0.896853	79.32	123.5	76.5	33.58	59.34	1	Acetyl [N-Term]
Q9Y4L1	Hypoxia up-regulated protein 1 OS=Homo sapiens OX=9606 GN=HYOU1 PE=1 SV=1	0	282.47	47	32	1507	32	999	111.3	5.22	3647.42	32	HYOU1	A8C1Z0; B7Z909; hsa:10525; Q2I204; Q53H25; Q9Y4L1	0	1.001	0.975926	54.75	103.8	96.2	10.75	27.26	1
Q6P2Q9	Pre-mRNA-processing-splicing factor 8 OS=Homo sapiens OX=9606 GN=PRPF8 PE=1 SV=2	0	282.256	28	47	807	47	2335	273.4	8.84	1141.99	47	PRPF8	hsa:10594; O14547; O75965; Q6P2Q9	0	1.551	0.975926	80.02	95.7	104.3	22.29	34.95	1	Met-loss+Acetyl [N-Term]
P23246	Splicing factor, proline- and glutamine-rich OS=Homo sapiens OX=9606 GN=SFPQ PE=1 SV=2	0	282.126	46	25	1528	24	707	76.1	9.44	3291.95	25	SFPQ	hsa:6421; P23246; P30808; Q5SZ71	1	2.021	0.899405	84.21	70.3	129.7	19.07	38.29	1
P30613	Pyruvate kinase PKLR OS=Homo sapiens OX=9606 GN=PKLR PE=1 SV=2	0	281.791	63	26	1844	24	574	61.8	7.74	4742.77	26	PKLR	hsa:5313; O75758; P11973; P30613	0	1.351	0.992504	79.83	104.3	95.7	23.99	63.43	1
Q63HN8	E3 ubiquitin-protein ligase RNF213 OS=Homo sapiens OX=9606 GN=RNF213 PE=1 SV=3	0	281.134	15	55	608	55	5207	591	6.48	773.86	55	RNF213	C9JCP4; D6RI12; F8WKS1; hsa:57674; Q63HN8; Q658P6; Q69YK7; Q6MZR1; Q8IWF4; Q8IZX1; Q8IZX2; Q8N406; Q8TEU0; Q9H6C9; Q9H6H9; Q9H6P3; Q9H8A9; Q9HCF4; Q9HCL8	0	1.322	0.99383	61.63	79.1	120.9	38.32	36.55	1
P14543	Nidogen-1 OS=Homo sapiens OX=9606 GN=NID1 PE=1 SV=3	0	281.128	45	36	1258	35	1247	136.3	5.29	2558.12	36	NID1	hsa:4811; P14543; Q14942; Q59FL2; Q5TAF2; Q5TAF3; Q86XD7	1	1.747	0.95258	75.37	65.1	134.9	63.16	62.85	1
P15104	Glutamine synthetase OS=Homo sapiens OX=9606 GN=GLUL PE=1 SV=4	0	280.987	54	15	866	15	373	42	6.89	1764.92	15	GLUL	hsa:2752; P15104; Q499Y9; Q5T9Z1; Q7Z3W4; Q8IZ17	0	1.542	0.975926	122.96	104.3	95.7	50.22	133.89	1
Q06830	Peroxiredoxin-1 OS=Homo sapiens OX=9606 GN=PRDX1 PE=1 SV=1	0	280.347	77	19	2606	16	199	22.1	8.13	6170.95	19	PRDX1	B5BU26; D3DPZ8; hsa:5052; P35703; Q06830; Q2V576; Q5T154; Q5T155	4	1.158	0.99383	64.69	88.9	111.1	15.34	56.61	1
P09972	Fructose-bisphosphate aldolase C OS=Homo sapiens OX=9606 GN=ALDOC PE=1 SV=2	0	279.903	57	18	1167	15	364	39.4	6.87	3413.51	18	ALDOC	B2R5R3; hsa:230; P09972; Q3SYL3; Q6FH94; Q6P0L5	0	1.217	0.998585	99.69	97	103	28.73	63.8	1	Met-loss [N-Term]
Q14624	Inter-alpha-trypsin inhibitor heavy chain H4 OS=Homo sapiens OX=9606 GN=ITIH4 PE=1 SV=4	0	279.83	39	29	908	29	930	103.3	6.98	1940.97	29	ITIH4	B7Z545; E9PGN5; hsa:3700; Q14624; Q15135; Q9P190; Q9UQ54	0	1.473	0.983577	71.22	84.2	115.8	14.16	56.63	1
Q16762	Thiosulfate sulfurtransferase OS=Homo sapiens OX=9606 GN=TST PE=1 SV=4	0	279.612	76	19	2532	18	297	33.4	7.25	6923.81	19	TST	B3KRM1; hsa:7263; Q16762; Q6IB06	1	0.835	0.939904	83.73	107.2	92.8	24.02	74.24	1
Q9UJS0	Electrogenic aspartate/glutamate antiporter SLC25A13, mitochondrial OS=Homo sapiens OX=9606 GN=SLC25A13 PE=1 SV=2	0	278.62	48	28	2189	21	675	74.1	8.62	5285.33	28	SLC25A13	hsa:10165; O14566; O14575; Q546F9; Q9NZW1; Q9UJS0; Q9UNI7	7	0.882	0.953	75.1	117.9	82.1	14.17	52.26	1
P09874	Poly [ADP-ribose] polymerase 1 OS=Homo sapiens OX=9606 GN=PARP1 PE=1 SV=4	0	277.548	42	33	1357	33	1014	113	8.88	2684.9	33	PARP1	B1ANJ4; hsa:142; P09874; Q8IUZ9	0	2.254	0.819387	71.41	58.3	141.7	32.81	39.36	1	Met-loss+Acetyl [N-Term]
Q92945	Far upstream element-binding protein 2 OS=Homo sapiens OX=9606 GN=KHSRP PE=1 SV=4	0	277.338	59	32	1334	30	711	73.1	7.3	2845.25	32	KHSRP	hsa:8570; O00301; Q59EZ9; Q5U4P6; Q92945; Q9UNT5; Q9UQH5	2	1.813	0.940848	75.26	61.1	138.9	65.64	62.51	1	Met-loss+Acetyl [N-Term]
P21549	Alanine--glyoxylate aminotransferase OS=Homo sapiens OX=9606 GN=AGXT PE=1 SV=1	0	274.513	68	24	4646	24	392	43	8.4	11314	24	AGXT	hsa:189; P21549; Q53QU6	0	0.148	0.000162042	127.88	184.6	15.4	31.3	155.54	1
P07339	Cathepsin D OS=Homo sapiens OX=9606 GN=CTSD PE=1 SV=1	0	274.394	60	22	2168	22	412	44.5	6.54	4794.52	22	CTSD	hsa:1509; P07339; Q6IB57	0	0.894	0.956013	77.71	114.5	85.5	23.9	47.36	1
Q15582	Transforming growth factor-beta-induced protein ig-h3 OS=Homo sapiens OX=9606 GN=TGFBI PE=1 SV=1	0	274.299	48	23	1353	23	683	74.6	7.71	2782.81	23	TGFBI	D3DQB1; hsa:7045; O14471; O14472; O14476; O43216; O43217; O43218; O43219; Q15582; Q53XM1	0	1.259	0.998585	77.91	93.3	106.7	24.85	60.18	1
O60488	Long-chain-fatty-acid--CoA ligase 4 OS=Homo sapiens OX=9606 GN=ACSL4 PE=1 SV=2	0	274.012	49	34	824	33	711	79.1	8.38	1945.54	34	ACSL4	D3DUY2; hsa:2182; O60488; O60848; O60849; Q5JWV8	1	3.859	0.181337	89.58	28	172	65.74	65.89	1
Q04446	1,4-alpha-glucan-branching enzyme OS=Homo sapiens OX=9606 GN=GBE1 PE=1 SV=3	0	273.028	46	25	1082	25	702	80.4	6.32	2422.58	25	GBE1	B3KWV3; hsa:2632; Q04446; Q96EN0	0	0.675	0.806369	84.67	120.1	79.9	18.05	27.95	1
P21589	5'-nucleotidase OS=Homo sapiens OX=9606 GN=NT5E PE=1 SV=1	0	272.755	47	21	725	21	574	63.3	7.03	1439.98	21	NT5E	B3KQI8; hsa:4907; O75520; P21589; Q5W116	0	2.281	0.806369	79.45	69.3	130.7	22.34	103.87	1
P35221	Catenin alpha-1 OS=Homo sapiens OX=9606 GN=CTNNA1 PE=1 SV=1	0	272.717	45	29	1475	25	906	100	6.29	3737.96	29	CTNNA1	hsa:1495; P35221; Q12795; Q8N1C0	4	1.353	0.992504	71.63	77.9	122.1	11.12	41.01	1	Met-loss+Acetyl [N-Term]
P60174	Triosephosphate isomerase OS=Homo sapiens OX=9606 GN=TPI1 PE=1 SV=4	0	272.022	90	21	4688	21	249	26.7	6.9	12399.2	21	TPI1	B7Z5D8; D3DUS9; hsa:7167; P00938; P60174; Q6FHP9; Q6IS07; Q8WWD0; Q96AG5	0	1.278	0.998449	43.5	87.5	112.5	13.4	22.73	1
P63010	AP-2 complex subunit beta OS=Homo sapiens OX=9606 GN=AP2B1 PE=1 SV=1	0	270.729	51	32	1318	20	937	104.5	5.38	2469.9	32	AP2B1	A6NJP3; hsa:163; P21851; P63010; Q7Z451; Q96J19	12	1.122	0.992504	66.13	106.5	93.5	7.52	25.88	1
P36776	Lon protease homolog, mitochondrial OS=Homo sapiens OX=9606 GN=LONP1 PE=1 SV=2	0	270.726	41	29	1245	29	959	106.4	6.39	2671.31	29	LONP1	B3KPH8; D6W635; E5KMH8; F5GZ27; hsa:9361; P36776; P36777; Q8N8K8; Q9UQ95	0	1.119	0.992504	46.62	93.3	106.7	12.36	26.05	1
P63244	Receptor of activated protein C kinase 1 OS=Homo sapiens OX=9606 GN=RACK1 PE=1 SV=3	0	270.502	85	23	2152	23	317	35.1	7.69	5158.81	23	RACK1	B3KTJ0; D3DWS0; hsa:10399; P25388; P63244; P99049; Q53HU2; Q5J8M6; Q5VLR4; Q6FH47	0	1.467	0.984689	44.84	77	123	17.47	32.57	1	Met-loss+Acetyl [N-Term]
Q14980	Nuclear mitotic apparatus protein 1 OS=Homo sapiens OX=9606 GN=NUMA1 PE=1 SV=2	0	270.334	27	39	782	39	2115	238.1	5.78	1557.55	39	NUMA1	H0YH75; hsa:4926; Q14980; Q14981; Q9BTE9	0	1.518	0.978461	64.04	78.3	121.7	35.52	38.59	1
P14866	Heterogeneous nuclear ribonucleoprotein L OS=Homo sapiens OX=9606 GN=HNRNPL PE=1 SV=2	0	270.242	42	16	1025	16	589	64.1	8.22	2654.46	16	HNRNPL	A6ND69; A6NIT8; hsa:3191; P14866; Q9H3P3	0	1.913	0.925961	72.87	54.5	145.5	42.46	28.08	1
O60656	UDP-glucuronosyltransferase 1A9 OS=Homo sapiens OX=9606 GN=UGT1A9 PE=1 SV=1	0	268.996	42	17	732	8	530	59.9	7.9	2136.32	17	UGT1A9	B8K285; hsa:54600; O60656; P36509; Q9HAX0	1	0.493	0.411168	76.63	127.3	72.7	48.71	42.27	1
Q9Y2P5	Long-chain fatty acid transport protein 5 OS=Homo sapiens OX=9606 GN=SLC27A5 PE=1 SV=1	0	267.718	58	30	1263	30	690	75.3	7.66	3133	30	SLC27A5	B3KVP6; B4DPQ1; hsa:10998; Q9Y2P5	0	0.586	0.642058	93.63	184.1	15.9	39.89	118.42	1
Q13011	Delta(3,5)-Delta(2,4)-dienoyl-CoA isomerase, mitochondrial OS=Homo sapiens OX=9606 GN=ECH1 PE=1 SV=2	0	266.874	78	22	2246	22	328	35.8	8	5988.35	22	ECH1	A8K745; hsa:1891; Q13011; Q8WVX0; Q96EZ9	0	0.929	0.964205	86.73	107.2	92.8	20.33	58.8	1
P05164	Myeloperoxidase OS=Homo sapiens OX=9606 GN=MPO PE=1 SV=1	0	265.945	47	32	1031	29	745	83.8	8.97	2012.47	32	MPO	A1L4B8; hsa:4353; P05164; Q14862; Q4PJH5; Q9UCL7	3	1.182	0.996481	127.3	102.5	97.5	28.96	136.44	1
P30041	Peroxiredoxin-6 OS=Homo sapiens OX=9606 GN=PRDX6 PE=1 SV=3	0	265.92	86	24	2965	24	224	25	6.38	7832.37	24	PRDX6	A8JZY7; hsa:9588; P30041; P32077; Q5TAH4; Q5ZEZ8	0	1.003	0.975926	69.22	98.9	101.1	17.62	40.52	1	Met-loss [N-Term]; Met-loss+Acetyl [N-Term]
P17655	Calpain-2 catalytic subunit OS=Homo sapiens OX=9606 GN=CAPN2 PE=1 SV=6	0	265.886	42	23	952	23	700	79.9	4.98	1940.93	23	CAPN2	A6NDG7; B7ZA96; E7ES58; hsa:824; P17655; Q16738; Q6PJT3; Q8WU26; Q9HBB1	0	1.177	0.994643	68.37	90	110	18.22	32.31	1
P13929	Beta-enolase OS=Homo sapiens OX=9606 GN=ENO3 PE=1 SV=5	0	265.638	66	22	1921	17	434	47	7.71	4300.73	22	ENO3	B4DUI6; B4DUM6; D3DTL2; E7ENK8; hsa:2027; P13929; Q96AE2	0	0.813	0.928829	91.21	152.8	47.2	86.47	129.04	1
Q6XQN6	Nicotinate phosphoribosyltransferase OS=Homo sapiens OX=9606 GN=NAPRT PE=1 SV=2	0	265.534	62	21	1337	21	538	57.5	5.68	3676.07	21	NAPRT	A7BFI3; hsa:93100; Q6PJL1; Q6XQN4; Q6XQN5; Q6XQN6; Q8N5E8; Q9BRG0	0	0.99	0.975926	95.65	111.8	88.2	27.71	85.3	1
P07384	Calpain-1 catalytic subunit OS=Homo sapiens OX=9606 GN=CAPN1 PE=1 SV=1	0	264.636	50	33	1887	33	714	81.8	5.67	3383.16	33	CAPN1	hsa:823; P07384; Q2TTR0; Q6DHV4	0	1.189	0.996481	71.09	91.7	108.3	23.94	37.47	1
Q01518	Adenylyl cyclase-associated protein 1 OS=Homo sapiens OX=9606 GN=CAP1 PE=1 SV=5	0	264.318	59	26	1411	26	475	51.9	8.06	3467.1	26	CAP1	hsa:10487; Q01518; Q53HR7; Q5T0S1; Q5T0S2; Q6I9U6	0	1.034	0.980663	53.47	103.1	96.9	19.54	30.6	1	Met-loss+Acetyl [N-Term]
Q92841	Probable ATP-dependent RNA helicase DDX17 OS=Homo sapiens OX=9606 GN=DDX17 PE=1 SV=2	0	264.234	58	36	2372	26	729	80.2	8.27	4754.84	36	DDX17	B1AHM0; H3BLZ8; hsa:10521; Q69YT1; Q6ICD6; Q92841	12	2.096	0.8812	85.44	71.3	128.7	50.35	41.96	1
Q96HE7	ERO1-like protein alpha OS=Homo sapiens OX=9606 GN=ERO1A PE=1 SV=2	0	263.972	59	22	882	21	468	54.4	5.68	2002.11	22	ERO1A	A8K9X4; A8MYW1; hsa:30001; Q7LD45; Q96HE7; Q9P1Q9; Q9UKV6	1	1.967	0.911354	72.21	63.2	136.8	32.31	85.53	1
P00738	Haptoglobin OS=Homo sapiens OX=9606 GN=HP PE=1 SV=1	0	263.874	51	24	1649	12	406	45.2	6.58	3603.22	24	HP	B0AZL5; hsa:3240; P00737; P00738; Q0VAC4; Q0VAC5; Q2PP15; Q3B7J0; Q6LBY9; Q9UC67	15	0.501	0.435561	66.45	131.3	68.7	31.37	22.24	1
Q96KP4	Cytosolic non-specific dipeptidase OS=Homo sapiens OX=9606 GN=CNDP2 PE=1 SV=2	0	263.835	66	26	1509	26	475	52.8	5.97	4135.89	26	CNDP2	B3KUG4; hsa:55748; Q8WY59; Q96KP4; Q9BQ94; Q9NVB4; V9HWE5	0	0.89	0.954646	56.59	107.5	92.5	22.21	22.1	1	Met-loss+Acetyl [N-Term]
P35555	Fibrillin-1 OS=Homo sapiens OX=9606 GN=FBN1 PE=1 SV=4	0	261.631	19	38	952	38	2871	312.1	4.93	1401.94	38	FBN1	B2RUU0; D2JYH6; hsa:2200; P35555; Q15972; Q75N87	0	1.074	0.988179	70.77	97.4	102.6	48.3	55	1
Q15075	Early endosome antigen 1 OS=Homo sapiens OX=9606 GN=EEA1 PE=1 SV=2	0	260.902	34	43	1092	43	1411	162.4	5.68	1815.61	43	EEA1	hsa:8411; Q14221; Q15075	0	1.778	0.945498	67.37	61.8	138.2	49.96	41.65	1
P11940	Polyadenylate-binding protein 1 OS=Homo sapiens OX=9606 GN=PABPC1 PE=1 SV=2	0	260.722	46	24	1808	16	636	70.6	9.5	3985.74	24	PABPC1	hsa:26986; P11940; Q15097; Q93004	11	2.347	0.774143	62.17	55.5	144.5	30.05	37.44	1	Acetyl [N-Term]
P41252	Isoleucine--tRNA ligase, cytoplasmic OS=Homo sapiens OX=9606 GN=IARS1 PE=1 SV=2	0	260.619	32	35	1179	35	1262	144.4	6.15	2161.89	35	IARS1	A8KAE9; hsa:3376; P41252; Q5TCD0; Q7Z3T4; Q9H588	0	2.4	0.754243	50.25	57.5	142.5	21.3	43.38	1
Q9H2A2	2-aminomuconic semialdehyde dehydrogenase OS=Homo sapiens OX=9606 GN=ALDH8A1 PE=1 SV=1	0	260.428	58	21	844	21	487	53.4	7.14	2513.16	21	ALDH8A1	B7Z521; hsa:64577; O60793; Q24JS9; Q53GT3; Q5TI80; Q9H2A2	0	0.56	0.58202	114.44	190.9	9.1	56.23	163.39	1
Q9Y678	Coatomer subunit gamma-1 OS=Homo sapiens OX=9606 GN=COPG1 PE=1 SV=1	0	260.261	57	33	1103	33	874	97.7	5.47	1854.55	33	COPG1	A8K6M8; B3KMF6; hsa:22820; Q54AC4; Q9Y678	0	1.456	0.984689	55.95	74.1	125.9	26.76	28.92	1
Q02218	2-oxoglutarate dehydrogenase complex component E1 OS=Homo sapiens OX=9606 GN=OGDH PE=1 SV=3	0	259.817	42	30	779	23	1023	115.9	6.86	1479.02	30	OGDH	B4E2U9; D3DVL0; E9PBM1; hsa:4967; Q02218; Q96DD3; Q9UDX0	7	0.735	0.883208	73.9	124.1	75.9	10.49	41.3	1
P08758	Annexin A5 OS=Homo sapiens OX=9606 GN=ANXA5 PE=1 SV=2	0	259.493	87	28	2266	28	320	35.9	5.05	5518.53	28	ANXA5	D3DNW7; hsa:308; P08758; Q6FHB3; Q6FI16; Q8WV69; Q9UDH9	0	0.675	0.806369	71.73	125.1	74.9	17.5	60.98	1
P23142	Fibulin-1 OS=Homo sapiens OX=9606 GN=FBLN1 PE=1 SV=4	0	259.132	40	18	978	18	703	77.2	5.22	2262.44	18	FBLN1	B0QY42; B1AHL4; hsa:2192; P23142; P23143; P23144; P37888; Q5TIC4; Q8TBH8; Q9HBQ5; Q9UC21; Q9UGR4; Q9UH41	0	1.218	0.998585	96.25	87.7	112.3	39.57	105.02	1
Q15393	Splicing factor 3B subunit 3 OS=Homo sapiens OX=9606 GN=SF3B3 PE=1 SV=4	0	256.319	35	32	1267	32	1217	135.5	5.26	2199.22	32	SF3B3	hsa:23450; Q15393; Q6NTI8; Q96GC0; Q9BPY2; Q9UFX7; Q9UJ29	0	2.142	0.87122	55.13	68.8	131.2	22.37	24.79	1
Q13509	Tubulin beta-3 chain OS=Homo sapiens OX=9606 GN=TUBB3 PE=1 SV=2	0	256.265	58	20	3294	5	450	50.4	4.93	6956.3	20	TUBB3	A8K854; hsa:10381; Q13509; Q9BTZ0; Q9BW10	2	0.982	0.942189	71.6	92.7	107.3	72.96	45.22	1
P23528	Cofilin-1 OS=Homo sapiens OX=9606 GN=CFL1 PE=1 SV=3	0	255.935	80	15	1952	12	166	18.5	8.09	6114.89	15	CFL1	B3KUQ1; hsa:1072; P23528; Q53Y87; Q9UCA2	3	1.559	0.975926	62.88	80.5	119.5	37.03	40.36	1	Met-loss+Acetyl [N-Term]
Q07157	Tight junction protein ZO-1 OS=Homo sapiens OX=9606 GN=TJP1 PE=1 SV=3	0	255.698	36	39	605	39	1748	195.3	6.7	767.07	39	TJP1	B4E3K1; hsa:7082; Q07157; Q2NKP3; Q4ZGJ6	0	1.47	0.984689	67.83	63.2	136.8	36.21	22.87	1
Q9C0C2	182 kDa tankyrase-1-binding protein OS=Homo sapiens OX=9606 GN=TNKS1BP1 PE=1 SV=4	0	255.137	30	31	879	31	1729	181.7	4.86	1662.55	31	TNKS1BP1	A7E2F8; hsa:85456; Q6PJ35; Q6ZV74; Q9C0C2	0	1.263	0.998585	61.85	83.4	116.6	24.35	44.58	1
P05177	Cytochrome P450 1A2 OS=Homo sapiens OX=9606 GN=CYP1A2 PE=1 SV=4	0	254.956	51	19	668	19	516	58.4	9.06	1460.7	19	CYP1A2	hsa:1544; P05177; Q16754; Q6NWU3; Q6NWU5; Q9BXX7; Q9UK49	0	0.338	0.0825668	122.66	142.2	57.8	67.32	60.13	1
P49588	Alanine--tRNA ligase, cytoplasmic OS=Homo sapiens OX=9606 GN=AARS1 PE=1 SV=2	0	254.796	42	29	1377	29	968	106.7	5.53	3117.75	29	AARS1	A6NF14; B4DR45; hsa:16; P49588; Q53GV7; Q96FA0	0	1.204	0.998449	47.03	83.3	116.7	9.7	18.22	1
Q92597	Protein NDRG1 OS=Homo sapiens OX=9606 GN=NDRG1 PE=1 SV=1	0	254.506	55	13	1017	13	394	42.8	5.82	2872.38	13	NDRG1	B3KR80; B7Z446; hsa:10397; O15207; Q6IBG2; Q92597; Q9NYR6; Q9UK29	0	4.465	0.0903599	82.67	29.5	170.5	14.6	70.81	1
Q99460	26S proteasome non-ATPase regulatory subunit 1 OS=Homo sapiens OX=9606 GN=PSMD1 PE=1 SV=2	0	253.993	39	23	899	23	953	105.8	5.39	1790.76	23	PSMD1	B8ZZH9; hsa:5707; Q24JU0; Q53TI2; Q6GMU5; Q6P2P4; Q6PJM7; Q6PKG9; Q86VU1; Q8IV79; Q99460	0	1.588	0.972752	51.04	76.9	123.1	14.02	20.31	1
P14550	Aldo-keto reductase family 1 member A1 OS=Homo sapiens OX=9606 GN=AKR1A1 PE=1 SV=3	0	253.556	76	19	1820	18	325	36.6	6.79	4843.29	19	AKR1A1	A8KAL8; D3DQ04; hsa:10327; P14550; Q6IAZ4	1	0.698	0.846158	59.73	116.3	83.7	26.65	30.2	1	Met-loss+Acetyl [N-Term]
P14324	Farnesyl pyrophosphate synthase OS=Homo sapiens OX=9606 GN=FDPS PE=1 SV=4	0	253.187	40	19	1052	19	419	48.2	6.15	2520.35	19	FDPS	D3DV91; E9PCI9; hsa:2224; P14324; Q96G29	0	2.572	0.668679	90.53	57.7	142.3	30.93	112.44	1
P12956	X-ray repair cross-complementing protein 6 OS=Homo sapiens OX=9606 GN=XRCC6 PE=1 SV=2	0	253.172	60	31	1371	30	609	69.8	6.64	2667.23	31	XRCC6	B1AHC8; hsa:2547; P12956; Q6FG89; Q9UCQ2; Q9UCQ3	1	2.23	0.831051	58.77	54.9	145.1	21.82	25.43	1	Met-loss+Acetyl [N-Term]
A3KMH1	von Willebrand factor A domain-containing protein 8 OS=Homo sapiens OX=9606 GN=VWA8 PE=1 SV=2	0	252.987	30	41	523	41	1905	214.7	7.4	774.63	41	VWA8	A3KMH1; hsa:23078; O60310; Q5JTP6; Q5VW08; Q7Z6I9; Q86YC9; Q8N3E4	0	1.092	0.989214	86.5	98.1	101.9	21.31	97.85	1
O43795	Unconventional myosin-Ib OS=Homo sapiens OX=9606 GN=MYO1B PE=1 SV=3	0	252.347	41	37	1190	35	1136	131.9	9.38	2034.32	37	MYO1B	hsa:4430; O43794; O43795; Q7Z6L5	2	0.996	0.975926	94.9	119.1	80.9	14.15	75.78	1
O60610	Protein diaphanous homolog 1 OS=Homo sapiens OX=9606 GN=DIAPH1 PE=1 SV=2	0	251.545	35	33	1065	33	1272	141.3	5.41	1780.39	33	DIAPH1	A6NF18; B7ZKW2; E9PEZ2; hsa:1729; O60610; Q17RN4; Q59FH8; Q9UC76	0	1.315	0.99383	49.11	82.8	117.2	8.56	33.33	1	Acetyl [N-Term]
P12109	Collagen alpha-1(VI) chain OS=Homo sapiens OX=9606 GN=COL6A1 PE=1 SV=3	0	251.347	33	25	1217	25	1028	108.5	5.43	2226.57	25	COL6A1	hsa:1291; O00117; O00118; P12109; Q14040; Q14041; Q16258; Q7Z645; Q9BSA8	0	0.715	0.86941	86.14	120.4	79.6	44.09	68.44	1
Q9UBR1	Beta-ureidopropionase OS=Homo sapiens OX=9606 GN=UPB1 PE=1 SV=1	0	251.115	50	16	1148	16	384	43.1	6.54	2947.99	16	UPB1	A3KMF8; hsa:51733; Q9UBR1; Q9UIR3	0	0.577	0.618992	111.8	132.2	67.8	31.64	120.56	1
O60716	Catenin delta-1 OS=Homo sapiens OX=9606 GN=CTNND1 PE=1 SV=1	0	250.763	37	28	1131	28	968	108.1	6.23	2234.01	28	CTNND1	A8K939; hsa:1500; O15088; O60713; O60714; O60715; O60716; O60935; Q6DHZ7; Q6RBX8; Q9UP71; Q9UP72; Q9UP73	0	1.263	0.998585	70.06	102.4	97.6	23.95	45.27	1
P11413	Glucose-6-phosphate 1-dehydrogenase OS=Homo sapiens OX=9606 GN=G6PD PE=1 SV=4	0	250.682	67	28	808	28	515	59.2	6.84	1637.89	28	G6PD	D3DWX9; hsa:2539; P11413; Q16000; Q16765; Q8IU70; Q8IU88; Q8IUA6; Q96PQ2	0	2.512	0.697705	117.84	97.9	102.1	79.29	102.53	1	Met-loss+Acetyl [N-Term]
P62805	Histone H4 OS=Homo sapiens OX=9606 GN=H4C16 PE=1 SV=2	0	250.416	62	19	3722	19	103	11.4	11.36	8870.65	19	H4C1; H4C11; H4C12; H4C13; H4C14; H4C15; H4C16; H4C2; H4C3; H4C4; H4C5; H4C6; H4C8; H4C9	A2VCL0; hsa:121504; hsa:554313; hsa:8294; hsa:8359; hsa:8360; hsa:8361; hsa:8362; hsa:8363; hsa:8364; hsa:8365; hsa:8366; hsa:8367; hsa:8368; hsa:8370; P02304; P02305; P62805; Q6DRA9; Q6FGB8; Q6NWP7	0	2.029	0.897282	81.12	39.2	160.8	15.17	51.81	1
O00468	Agrin OS=Homo sapiens OX=9606 GN=AGRN PE=1 SV=6	0	249.793	28	33	839	33	2068	217.2	6.39	1495.18	33	AGRN	hsa:375790; O00468; Q5SVA1; Q5SVA2; Q60FE1; Q7KYS8; Q8N4J5; Q96IC1; Q9BTD4	0	1.352	0.992504	75.56	83.9	116.1	39.83	35.39	1
P35900	Keratin, type I cytoskeletal 20 OS=Homo sapiens OX=9606 GN=KRT20 PE=1 SV=1	0	247.618	66	32	440	28	424	48.5	5.69	1052.39	32	KRT20	B2R6W7; hsa:54474; P35900	4	1.45	0.984689	86.89	95.5	104.5	23.28	113.74	1
Q86VP6	Cullin-associated NEDD8-dissociated protein 1 OS=Homo sapiens OX=9606 GN=CAND1 PE=1 SV=2	0	247.083	35	34	1699	34	1230	136.3	5.78	3648.7	34	CAND1	B2RAU3; hsa:55832; O94918; Q6PIY4; Q86VP6; Q8NDJ4; Q96JZ9; Q96T19; Q9BTC4; Q9H0G2; Q9P0H7; Q9UF85	0	1.476	0.983577	50.05	76.5	123.5	18.21	28.06	1
Q96RQ3	Methylcrotonoyl-CoA carboxylase subunit alpha, mitochondrial OS=Homo sapiens OX=9606 GN=MCCC1 PE=1 SV=3	0	246.665	48	24	870	24	725	80.4	7.78	2201.32	24	MCCC1	hsa:56922; Q59ES4; Q96RQ3; Q9H959; Q9NS97	0	0.579	0.623241	72.35	114.5	85.5	24.59	71.09	1
O60506	Heterogeneous nuclear ribonucleoprotein Q OS=Homo sapiens OX=9606 GN=SYNCRIP PE=1 SV=2	0	246.023	51	25	1718	19	623	69.6	8.59	3773.96	25	SYNCRIP	E1P501; E1P502; hsa:10492; O60506; Q53H05; Q5TCG2; Q5TCG3; Q8IW78; Q8N599; Q96LC1; Q96LC2; Q9Y583	7	2.3	0.796835	54.55	54	146	25.41	28.88	1
P35503	UDP-glucuronosyltransferase 1A3 OS=Homo sapiens OX=9606 GN=UGT1A3 PE=1 SV=1	0	245.947	28	11	673	2	534	60.3	8.18	2177.41	11	UGT1A3	B8K287; hsa:54659; P35503	0	1.187	0.983577	82.92	90.8	109.2	51.56	38.07	1
O00151	PDZ and LIM domain protein 1 OS=Homo sapiens OX=9606 GN=PDLIM1 PE=1 SV=4	0	245.421	74	17	1115	17	329	36	7.02	2690.8	17	PDLIM1	B2RBS6; hsa:9124; O00151; Q5VZH5; Q9BPZ9	0	1.42	0.98901	83.58	77.1	122.9	33.44	57.3	1
Q06210	Glutamine--fructose-6-phosphate aminotransferase [isomerizing] 1 OS=Homo sapiens OX=9606 GN=GFPT1 PE=1 SV=3	0	245.234	46	25	1116	25	699	78.8	7.11	2423.43	25	GFPT1	hsa:2673; Q06210; Q53QE6; Q9BXF8	0	1.847	0.939278	58.27	66	134	30.43	39.48	1
Q14032	Bile acid-CoA:amino acid N-acyltransferase OS=Homo sapiens OX=9606 GN=BAAT PE=1 SV=1	0	245.122	56	17	790	17	418	46.3	6.99	2164.9	17	BAAT	hsa:570; Q14032; Q3B7W9; Q96L31	0	0.644	0.759802	99.9	180.4	19.6	45.69	139.58	1	Met-loss [N-Term]; Acetyl [N-Term]
O95782	AP-2 complex subunit alpha-1 OS=Homo sapiens OX=9606 GN=AP2A1 PE=1 SV=3	0	244.687	43	28	1058	21	977	107.5	7.03	2113.29	28	AP2A1	hsa:160; O95782; Q96CI7; Q96PP6; Q96PP7; Q9H070	7	1.314	0.99383	63.14	88.8	111.2	10.81	62.89	1
Q13085	Acetyl-CoA carboxylase 1 OS=Homo sapiens OX=9606 GN=ACACA PE=1 SV=2	0	243.685	27	42	529	34	2346	265.4	6.37	719.1	42	ACACA	B2RP68; B2ZZ90; hsa:31; Q13085; Q6KEV6; Q6XDA8; Q7Z2G8; Q7Z561; Q7Z563; Q7Z564; Q86WB2; Q86WB3	9	1.207	0.998449	92.03	160.5	39.5	37.15	101.32	1
Q9UQ80	Proliferation-associated protein 2G4 OS=Homo sapiens OX=9606 GN=PA2G4 PE=1 SV=3	0	243.573	55	21	1413	21	394	43.8	6.55	3570.87	21	PA2G4	hsa:5036; O43846; Q9UM59; Q9UQ80	0	2.318	0.787714	46.86	60.2	139.8	21.44	49.49	1	Met-loss+Acetyl [N-Term]
Q99497	Parkinson disease protein 7 OS=Homo sapiens OX=9606 GN=PARK7 PE=1 SV=2	0	243.484	71	14	1658	14	189	19.9	6.79	5461.26	14	PARK7	B2R4Z1; hsa:11315; O14805; Q6DR95; Q7LFU2; Q99497	0	0.912	0.957664	44.52	103.9	96.1	10.5	24.88	1
P49257	Protein ERGIC-53 OS=Homo sapiens OX=9606 GN=LMAN1 PE=1 SV=2	0	243.349	42	17	1269	17	510	57.5	6.77	3082.46	17	LMAN1	hsa:3998; P49257; Q12895; Q8N5I7; Q9UQG1; Q9UQG2; Q9UQG3; Q9UQG4; Q9UQG5; Q9UQG6; Q9UQG7; Q9UQG8; Q9UQG9; Q9UQH0; Q9UQH1; Q9UQH2	0	1.223	0.998585	55.63	96.7	103.3	20.44	27.67	1
P41250	Glycine--tRNA ligase OS=Homo sapiens OX=9606 GN=GARS1 PE=1 SV=3	0	243.274	46	25	972	25	739	83.1	7.03	2089.89	25	GARS1	A0A090N8G0; B3KQA2; B4DIA0; hsa:2617; P41250; Q969Y1	0	1.96	0.913623	58.46	75.9	124.1	23.43	57.15	1
P22102	Trifunctional purine biosynthetic protein adenosine-3 OS=Homo sapiens OX=9606 GN=GART PE=1 SV=1	0	243.256	47	34	1029	34	1010	107.7	6.7	1990.47	34	GART	A8K945; A8KA32; D3DSF3; D3DSF4; hsa:2618; O14659; P22102; Q52M77	0	1.928	0.919583	59.42	94.9	105.1	27.15	39.83	1
P23786	Carnitine O-palmitoyltransferase 2, mitochondrial OS=Homo sapiens OX=9606 GN=CPT2 PE=1 SV=2	0	242.459	50	26	954	26	658	73.7	8.18	2432.32	26	CPT2	B2R6S0; hsa:1376; P23786; Q5SW68; Q9BQ26	0	0.488	0.400789	84.18	96.9	103.1	18.99	64.91	1
P09327	Villin-1 OS=Homo sapiens OX=9606 GN=VIL1 PE=1 SV=4	0	242.117	42	30	1089	29	827	92.6	6.39	2318.37	30	VIL1	B2R9A7; hsa:7429; P09327; Q53S11; Q96AC8	1	2.398	0.755063	93.69	79.8	120.2	100.7	63.75	1
P49189	4-trimethylaminobutyraldehyde dehydrogenase OS=Homo sapiens OX=9606 GN=ALDH9A1 PE=1 SV=3	0	241.565	48	19	1615	19	494	53.8	5.87	3212.42	19	ALDH9A1	B2R6X1; B4DXY7; B9EKV4; hsa:223; P49189; Q5VV90; Q6LCL1; Q9NZT7	0	0.764	0.902141	54.73	110.3	89.7	12.1	16.69	1
Q9UDR5	Alpha-aminoadipic semialdehyde synthase, mitochondrial OS=Homo sapiens OX=9606 GN=AASS PE=1 SV=1	0	241.491	39	26	588	26	926	102.1	6.64	1212.23	26	AASS	hsa:10157; O95462; Q9UDR5	0	0.774	0.910953	86.37	136.6	63.4	42.55	66.23	1
P22626	Heterogeneous nuclear ribonucleoproteins A2/B1 OS=Homo sapiens OX=9606 GN=HNRNPA2B1 PE=1 SV=2	0	241.271	61	23	3375	19	353	37.4	8.95	6590.81	23	HNRNPA2B1	A0A024RA27; A0A024RA61; A8K064; hsa:3181; P22626; P22627; Q9UC98; Q9UDJ2	4	1.92	0.923322	69.05	59.4	140.6	30.6	28.08	1
P00390	Glutathione reductase, mitochondrial OS=Homo sapiens OX=9606 GN=GSR PE=1 SV=2	0	241.03	67	23	853	23	522	56.2	8.5	1999.37	23	GSR	C8KIL8; C8KIL9; C8KIM0; D3DSV3; hsa:2936; P00390; Q7Z5C9; Q9NP63	0	1.226	0.998585	80.39	146.6	53.4	60.36	66.57	1
P35558	Phosphoenolpyruvate carboxykinase, cytosolic [GTP] OS=Homo sapiens OX=9606 GN=PCK1 PE=1 SV=3	0	240.926	54	26	847	23	622	69.2	6.14	2004.48	26	PCK1	A8K437; B4DT64; hsa:5105; P35558; Q8TCA3; Q9UJD2	0	0.275	0.0235157	119.53	138	62	30.27	52.94	1	Met-loss [N-Term]
Q08257	Quinone oxidoreductase OS=Homo sapiens OX=9606 GN=CRYZ PE=1 SV=1	0	239.59	85	21	1322	21	329	35.2	8.44	3529.7	21	CRYZ	A6NN60; D3DQ76; hsa:1429; Q08257; Q53FT0; Q59EU7; Q5HYE7; Q6NSK9	0	0.547	0.548177	71.69	132.7	67.3	20.54	46.75	1
P07306	Asialoglycoprotein receptor 1 OS=Homo sapiens OX=9606 GN=ASGR1 PE=1 SV=2	0	239.41	63	17	564	17	291	33.2	5.5	1084.81	17	ASGR1	hsa:432; I3L1X1; P07306	0	1.048	0.984689	97.83	117.3	82.7	9.02	123.77	1	Met-loss [N-Term]
Q15063	Periostin OS=Homo sapiens OX=9606 GN=POSTN PE=1 SV=2	0	239.383	44	25	493	25	836	93.3	7.53	886.12	25	POSTN	B1ALD8; C0IMJ1; C0IMJ2; C0IMJ4; D2KRH7; F5H628; hsa:10631; Q15063; Q15064; Q29XZ0; Q3KPJ5; Q5VSY5; Q8IZF9	0	1.474	0.983577	88.24	75.7	124.3	49.9	84.81	1
P20700	Lamin-B1 OS=Homo sapiens OX=9606 GN=LMNB1 PE=1 SV=2	0	238.201	57	31	1461	26	586	66.4	5.16	3306.3	31	LMNB1	B2R6J6; hsa:4001; P20700; Q3SYN7; Q96EI6	4	1.571	0.97425	74.39	67.9	132.1	33.76	30.73	1
Q14914	Prostaglandin reductase 1 OS=Homo sapiens OX=9606 GN=PTGR1 PE=1 SV=2	0	238.071	57	18	1418	18	329	35.8	8.29	3812.93	18	PTGR1	A8K0N2; B4DPK3; F5GY50; hsa:22949; Q14914; Q8IYQ0; Q9H1X6	0	0.651	0.766013	68.03	121.6	78.4	31.01	20.24	1
P00915	Carbonic anhydrase 1 OS=Homo sapiens OX=9606 GN=CA1 PE=1 SV=2	0	238.003	66	13	1434	13	261	28.9	7.12	2950.24	13	CA1	hsa:759; P00915	0	0.648	0.76002	83.04	127.4	72.6	26.66	61.94	1	Met-loss+Acetyl [N-Term]
P31150	Rab GDP dissociation inhibitor alpha OS=Homo sapiens OX=9606 GN=GDI1 PE=1 SV=2	0	237.179	62	24	1440	13	447	50.6	5.14	3120.36	24	GDI1	hsa:2664; P31150; P50394; Q6FG50; Q7Z2G6; Q7Z2G9; Q7Z2H5; Q7Z2I6	0	1.025	0.980663	50.34	87.1	112.9	29.37	33.9	1
Q14166	Tubulin--tyrosine ligase-like protein 12 OS=Homo sapiens OX=9606 GN=TTLL12 PE=1 SV=2	0	237.089	51	23	698	23	644	74.4	5.53	1584.59	23	TTLL12	hsa:23170; Q14166; Q20WK5; Q9UGU3	0	1.956	0.913854	68.92	76.4	123.6	26.69	30.36	1
Q14117	Dihydropyrimidinase OS=Homo sapiens OX=9606 GN=DPYS PE=1 SV=1	0	236.916	45	17	1210	16	519	56.6	7.27	2988.5	17	DPYS	hsa:1807; Q14117	1	0.389	0.163303	103.3	151.3	48.7	45.89	67.66	1
Q8WUM4	Programmed cell death 6-interacting protein OS=Homo sapiens OX=9606 GN=PDCD6IP PE=1 SV=1	0	235.302	42	31	1484	31	868	96	6.52	2864.41	31	PDCD6IP	C5MQH7; E9PFU1; hsa:10015; Q6NUS1; Q8WUM4; Q9BX86; Q9NUN0; Q9P2H2; Q9UKL5	0	1.352	0.992504	54.38	85.3	114.7	14.46	23.39	1	Met-loss+Acetyl [N-Term]
P52209	6-phosphogluconate dehydrogenase, decarboxylating OS=Homo sapiens OX=9606 GN=PGD PE=1 SV=3	0	235.102	56	22	1603	22	483	53.1	7.23	3879.6	22	PGD	A8K2Y9; B4DQJ8; hsa:5226; P52209; Q9BWD8	0	1.398	0.9904	60.45	81.6	118.4	13.01	38.4	1
Q16698	2,4-dienoyl-CoA reductase [(3E)-enoyl-CoA-producing], mitochondrial OS=Homo sapiens OX=9606 GN=DECR1 PE=1 SV=1	0	234.763	72	18	1880	18	335	36	9.28	3773.81	18	DECR1	B7Z6B8; hsa:1666; Q16698; Q2M304; Q93085	0	0.572	0.610551	84.33	144.8	55.2	25.24	63.33	1
Q5JPE7	Nodal modulator 2 OS=Homo sapiens OX=9606 GN=NOMO2 PE=1 SV=1	0	234.452	37	25	725	3	1267	139.4	5.76	1360.45	25	NOMO2	hsa:283820; Q4G177; Q5JPE7	26	1.476	0.983577	52.89	79.5	120.5	17.66	25.23	1
Q14315	Filamin-C OS=Homo sapiens OX=9606 GN=FLNC PE=1 SV=3	0	234.344	18	35	662	26	2725	290.8	5.97	1550.84	35	FLNC	B2ZZ88; hsa:2318; O95303; Q07985; Q14315; Q9NS12; Q9NYE5; Q9UMR8; Q9Y503	0	1.131	0.992504	80.88	135.7	64.3	41.55	117.48	1
P08263	Glutathione S-transferase A1 OS=Homo sapiens OX=9606 GN=GSTA1 PE=1 SV=3	0	234.341	70	21	1620	5	222	25.6	8.88	2860.16	21	GSTA1	hsa:2938; P08263; Q14750; Q5GHF8; Q5SZC1	24	0.726	0.878743	110.13	144.7	55.3	57.84	80.74	1	Met-loss+Acetyl [N-Term]
Q93052	Lipoma-preferred partner OS=Homo sapiens OX=9606 GN=LPP PE=1 SV=1	0	234.031	58	17	1011	17	612	65.7	7.37	1997.19	17	LPP	A1L4L6; D3DNV6; hsa:4026; Q8NFX5; Q93052	0	0.9	0.956013	63.6	109.1	90.9	31.86	38.72	1
Q99424	Peroxisomal acyl-coenzyme A oxidase 2 OS=Homo sapiens OX=9606 GN=ACOX2 PE=1 SV=1	0	233.855	54	26	941	26	681	76.8	7.56	2253.06	26	ACOX2	A6NF16; B2R8U5; hsa:8309; Q99424	0	0.964	0.972752	75.93	182.4	17.6	41.48	125.28	1
Q5T4S7	E3 ubiquitin-protein ligase UBR4 OS=Homo sapiens OX=9606 GN=UBR4 PE=1 SV=1	0	233.387	13	45	472	45	5183	573.5	6.04	477.23	45	UBR4	A8MPT2; A8MQ33; A8MQB1; hsa:23352; O60646; O75050; Q4QRK5; Q5T4S7; Q5T4S8; Q5T4S9; Q5TBN8; Q5TBP2; Q6DKH8; Q6P4A4; Q7L8P7; Q8IXJ4; Q8TDN5; Q8WV67; Q9HA46; Q9P2N9; Q9UG82	0	1.5	0.980663	62.49	86.6	113.4	22.16	46.48	1
P09651	Heterogeneous nuclear ribonucleoprotein A1 OS=Homo sapiens OX=9606 GN=HNRNPA1 PE=1 SV=5	0	232.645	47	20	1786	16	372	38.7	9.13	4579.87	20	HNRNPA1	A8K4Z8; hsa:3178; P09651; Q3MIB7; Q6PJZ7	0	2.674	0.61682	69.11	46.2	153.8	43.3	34.31	1
P62937	Peptidyl-prolyl cis-trans isomerase A OS=Homo sapiens OX=9606 GN=PPIA PE=1 SV=2	0	232.369	83	14	3255	14	165	18	7.81	6989.84	14	PPIA	A8K220; hsa:5478; P05092; P62937; Q3KQW3; Q567Q0; Q6IBU5; Q96IX3; Q9BRU4; Q9BTY9; Q9UC61	0	1.773	0.945498	53.56	77.6	122.4	13.93	25.65	1	Met-loss [N-Term]; Met-loss+Acetyl [N-Term]
P18669	Phosphoglycerate mutase 1 OS=Homo sapiens OX=9606 GN=PGAM1 PE=1 SV=2	0	232.231	86	18	1639	8	254	28.8	7.18	4009.54	18	PGAM1	hsa:5223; P18669; Q9BWC0	13	1.073	0.988179	47.4	93.8	106.2	17.92	21.71	1	Met-loss+Acetyl [N-Term]
P12268	Inosine-5'-monophosphate dehydrogenase 2 OS=Homo sapiens OX=9606 GN=IMPDH2 PE=1 SV=2	0	232.017	62	25	823	24	514	55.8	6.9	1862.25	25	IMPDH2	hsa:3615; P12268; Q6LEF3	1	2.345	0.774143	71.87	63.2	136.8	37.35	76.87	1
Q9H4M9	EH domain-containing protein 1 OS=Homo sapiens OX=9606 GN=EHD1 PE=1 SV=2	0	231.6	63	25	931	15	534	60.6	6.83	1715.73	25	EHD1	hsa:10938; O14611; Q2M3Q4; Q9H4M9; Q9UNR3	11	0.791	0.916693	60.42	119.4	80.6	74.67	91.72	1
Q13217	DnaJ homolog subfamily C member 3 OS=Homo sapiens OX=9606 GN=DNAJC3 PE=1 SV=1	0	231.413	37	15	440	15	504	57.5	6.15	857.97	15	DNAJC3	hsa:5611; Q13217; Q86WT9; Q8N4N2	0	1.536	0.975926	68.69	84.6	115.4	33.61	73.48	1
P35241	Radixin OS=Homo sapiens OX=9606 GN=RDX PE=1 SV=1	0	231.084	47	28	1280	17	583	68.5	6.37	2402.97	28	RDX	A7YIJ8; A7YIK0; A7YIK3; B7Z9U6; F5H1A7; hsa:5962; P35241; Q86Y61	0	1.095	0.989993	84.27	113.6	86.4	33.97	72.84	1
P11766	Alcohol dehydrogenase class-3 OS=Homo sapiens OX=9606 GN=ADH5 PE=1 SV=4	0	230.931	72	20	789	20	374	39.7	7.49	2024.01	20	ADH5	hsa:128; P11766; Q6FHR2	0	0.647	0.76002	79.78	126.4	73.6	19.84	49.71	1
P54136	Arginine--tRNA ligase, cytoplasmic OS=Homo sapiens OX=9606 GN=RARS1 PE=1 SV=2	0	230.854	53	35	1140	35	660	75.3	6.68	2235.97	35	RARS1	B2RBS9; hsa:5917; P54136; Q53GY4; Q9BWA1	0	1.86	0.938291	43.62	72.7	127.3	17.71	26.45	1
Q99536	Synaptic vesicle membrane protein VAT-1 homolog OS=Homo sapiens OX=9606 GN=VAT1 PE=1 SV=2	0	230.465	68	17	1060	17	393	41.9	6.29	2395.39	17	VAT1	A8K345; B0AZP7; B4DPX4; hsa:10493; Q13035; Q5BKZ7; Q96A39; Q99536; Q9BUT8	0	1.612	0.970496	79.31	77	123	45.53	85.75	1	Met-loss+Acetyl [N-Term]
P42357	Histidine ammonia-lyase OS=Homo sapiens OX=9606 GN=HAL PE=1 SV=1	0	230.06	49	23	681	23	657	72.7	6.95	1419.35	23	HAL	B4DQC1; B4E0V8; F5GXF2; F5H1U5; hsa:3034; P42357; Q4VB92; Q4VB93	0	0.715	0.86941	121.98	152.8	47.2	67.73	172.33	1
Q92900	Regulator of nonsense transcripts 1 OS=Homo sapiens OX=9606 GN=UPF1 PE=1 SV=2	0	230.058	38	30	897	30	1129	124.3	6.61	1643.75	30	UPF1	hsa:5976; O00239; O43343; Q86Z25; Q92842; Q92900	0	1.987	0.910953	67.07	73.8	126.2	16.58	30.03	1
P19823	Inter-alpha-trypsin inhibitor heavy chain H2 OS=Homo sapiens OX=9606 GN=ITIH2 PE=1 SV=2	0	229.941	37	26	940	26	946	106.4	6.86	1889.42	26	ITIH2	hsa:3698; P19823; Q14659; Q15484; Q5T986	0	1.81	0.940848	85.49	96.3	103.7	27.03	63.49	1
Q07065	Cytoskeleton-associated protein 4 OS=Homo sapiens OX=9606 GN=CKAP4 PE=1 SV=2	0	229.419	50	27	1376	27	602	66	5.92	2817.32	27	CKAP4	hsa:10970; Q07065; Q504S5; Q53ES6	0	2.199	0.847884	75.51	66.7	133.3	41.67	40.83	1
P46060	Ran GTPase-activating protein 1 OS=Homo sapiens OX=9606 GN=RANGAP1 PE=1 SV=1	0	229.17	60	27	616	27	587	63.5	4.68	1215.4	27	RANGAP1	hsa:5905; P46060; Q96JJ2	0	1.696	0.957664	79.72	79.4	120.6	34.4	34.68	1
Q16555	Dihydropyrimidinase-related protein 2 OS=Homo sapiens OX=9606 GN=DPYSL2 PE=1 SV=1	0	229.101	44	22	1206	21	572	62.3	6.38	2501.65	22	DPYSL2	A8K5H2; B4DR31; D3DSS7; hsa:1808; O00424; Q16555	1	0.467	0.346544	60.32	125.3	74.7	17.06	25.42	1
Q16891	MICOS complex subunit MIC60 OS=Homo sapiens OX=9606 GN=IMMT PE=1 SV=1	0	228.837	40	24	1244	24	758	83.6	6.48	3046.03	24	IMMT	B1H0U5; B2R5N6; hsa:10989; Q14539; Q15092; Q16891; Q68D41; Q69HW5; Q6IBL0; Q7Z3X1; Q8TAJ5; Q9P0V2	0	1.159	0.99383	45.22	104	96	11.44	20.9	1
Q7Z5P4	17-beta-hydroxysteroid dehydrogenase 13 OS=Homo sapiens OX=9606 GN=HSD17B13 PE=1 SV=1	0	228.639	69	23	576	23	300	33.6	8.98	1103.89	23	HSD17B13	A8K9R9; hsa:345275; Q2M1L5; Q7Z5P4; Q86W22; Q86W23	0	0.325	0.0670489	108.43	179.3	20.7	78.57	48.6	1
P53396	ATP-citrate synthase OS=Homo sapiens OX=9606 GN=ACLY PE=1 SV=3	0	228.222	31	26	1075	26	1101	120.8	7.33	2253.84	26	ACLY	B4DIM0; B4E3P0; hsa:47; P53396; Q13037; Q9BRL0	0	2.241	0.826329	56.74	51.1	148.9	36.84	50.53	1
P17858	ATP-dependent 6-phosphofructokinase, liver type OS=Homo sapiens OX=9606 GN=PFKL PE=1 SV=6	0	228.179	43	22	1210	20	780	85	7.5	2906.37	22	PFKL	hsa:5211; P17858; Q96A64; Q96IH4; Q9BR91	2	1.08	0.98865	56.89	97	103	14.11	26.89	1
P27695	DNA-(apurinic or apyrimidinic site) endonuclease OS=Homo sapiens OX=9606 GN=APEX1 PE=1 SV=2	0	228.045	68	19	699	19	318	35.5	8.12	1991.53	19	APEX1	hsa:328; P27695; Q969L5; Q99775	0	1.898	0.928554	78.73	70.8	129.2	36.05	51.87	1
Q6IB77	Glycine N-acyltransferase OS=Homo sapiens OX=9606 GN=GLYAT PE=1 SV=3	0	227.601	77	18	905	18	296	33.9	8.16	2183.15	18	GLYAT	H1AE11; hsa:10249; O14833; Q6IB77; Q96QK7	0	0.281	0.0270387	87.32	196.2	3.8	42.75	142.86	1	Met-loss [N-Term]
Q9H0W9	Ester hydrolase C11orf54 OS=Homo sapiens OX=9606 GN=C11orf54 PE=1 SV=1	0	226.893	49	13	841	13	315	35.1	6.7	2356.76	13	C11orf54	A8K850; hsa:28970; Q6FI88; Q6XYB0; Q96EI3; Q96IX1; Q9H0W9; Q9Y6B4	0	0.866	0.945498	90.3	114.3	85.7	27.89	110.48	1
Q93099	Homogentisate 1,2-dioxygenase OS=Homo sapiens OX=9606 GN=HGD PE=1 SV=2	0	226.623	60	15	1049	15	445	49.9	6.96	2136.59	15	HGD	A8K417; B2R8Z0; hsa:3081; Q93099	0	0.666	0.791064	100.76	156.2	43.8	37.82	98.43	1
P17987	T-complex protein 1 subunit alpha OS=Homo sapiens OX=9606 GN=TCP1 PE=1 SV=1	0	226.585	65	27	1290	27	556	60.3	6.11	2962.42	27	TCP1	E1P5B2; hsa:6950; P17987; Q15556; Q5TCM3	0	2.119	0.878496	53.54	69.1	130.9	18.13	16.09	1	Acetyl [N-Term]
P23284	Peptidyl-prolyl cis-trans isomerase B OS=Homo sapiens OX=9606 GN=PPIB PE=1 SV=2	0	226.171	68	20	2740	20	216	23.7	9.41	6436.28	20	PPIB	A8K534; hsa:5479; P23284; Q6IBH5; Q9BVK5	0	1.122	0.992504	63	96.8	103.2	10.27	30.57	1
P05181	Cytochrome P450 2E1 OS=Homo sapiens OX=9606 GN=CYP2E1 PE=1 SV=1	0	225.833	53	25	1211	24	493	56.8	8.1	2873.55	25	CYP2E1	hsa:1571; P05181; Q5VZD5; Q6NWT9; Q9UK47	1	0.996	0.975926	92.43	160.8	39.2	21.59	105.77	1
Q9HAW8	UDP-glucuronosyltransferase 1A10 OS=Homo sapiens OX=9606 GN=UGT1A10 PE=1 SV=1	0	225.678	24	10	579	1	530	59.8	7.3	1866.12	10	UGT1A10	hsa:54575; O00474; Q6NT91; Q7Z6H8; Q9HAW8	0	100	2.00326e-16			200		29.52	1
P28332	Alcohol dehydrogenase 6 OS=Homo sapiens OX=9606 GN=ADH6 PE=1 SV=3	0	225.522	74	20	1047	19	368	39	7.8	2483.64	20	ADH6	A0A0A0MS56; B3KS45; hsa:130; P28332; Q58F53	0	0.484	0.391205	88.41	164.5	35.5	37.08	81.71	1	Met-loss+Acetyl [N-Term]
Q9NTK5	Obg-like ATPase 1 OS=Homo sapiens OX=9606 GN=OLA1 PE=1 SV=2	0	225.324	67	20	991	20	396	44.7	7.81	1943.71	20	OLA1	D7EHM2; hsa:29789; Q5BJD7; Q8NCI8; Q96CU1; Q96SV2; Q9NTK5; Q9P1D3; Q9UNY9; Q9Y6G4	0	2.218	0.8378	52.73	50.7	149.3	25.36	34.71	1
P00439	Phenylalanine-4-hydroxylase OS=Homo sapiens OX=9606 GN=PAH PE=1 SV=1	0	225.105	73	26	927	26	452	51.8	6.6	2029.03	26	PAH	hsa:5053; P00439; Q16717; Q8TC14	0	0.326	0.0672057	89.53	174.1	25.9	35.12	107.82	1	Met-loss+Acetyl [N-Term]
Q6YN16	Hydroxysteroid dehydrogenase-like protein 2 OS=Homo sapiens OX=9606 GN=HSDL2 PE=1 SV=1	0	225.071	60	26	1167	26	418	45.4	7.99	3061.78	26	HSDL2	A8K1L4; A8K8X1; A8MSV3; hsa:84263; Q658M8; Q6YN16; Q9BT58	0	1.206	0.998449	86.71	102.6	97.4	19.04	57.76	1
O15230	Laminin subunit alpha-5 OS=Homo sapiens OX=9606 GN=LAMA5 PE=1 SV=8	0	224.332	15	34	549	34	3695	399.5	7.02	924.75	34	LAMA5	hsa:3911; O15230; Q5U4N9; Q8TDF8; Q8WZA7; Q9H1P1	0	1.099	0.9904	64.2	87.1	112.9	47.77	42.45	1
O95831	Apoptosis-inducing factor 1, mitochondrial OS=Homo sapiens OX=9606 GN=AIFM1 PE=1 SV=1	0	223.409	48	24	1392	24	613	66.9	8.95	3299.85	24	AIFM1	A4QPB4; B1ALN1; B2RB08; D3DTE9; E9PRR0; hsa:9131; O95831; Q1L6K4; Q1L6K6; Q2QKE4; Q5JUZ7; Q6I9X6; Q9Y3I3; Q9Y3I4	0	0.529	0.511039	74.23	140.8	59.2	23.51	53.32	1
P50991	T-complex protein 1 subunit delta OS=Homo sapiens OX=9606 GN=CCT4 PE=1 SV=4	0	223.367	59	23	1540	22	539	57.9	7.83	3718.52	23	CCT4	B2R6I3; B7Z8B1; F5H5W3; hsa:10575; O14870; P50991; Q53QP9; Q96C51	0	2.011	0.902141	57.15	69.8	130.2	23.03	19.25	1
Q15746	Myosin light chain kinase, smooth muscle OS=Homo sapiens OX=9606 GN=MYLK PE=1 SV=4	0	223.142	23	32	714	31	1914	210.6	6.15	1221.09	32	MYLK	B4DUE3; D3DN97; hsa:4638; O95796; O95797; O95798; O95799; Q14844; Q15746; Q16794; Q17S15; Q3ZCP9; Q5MY99; Q5MYA0; Q6P2N0; Q7Z4J0; Q9C0L5; Q9UBG5; Q9UBY6; Q9UIT9	1	0.492	0.411168	90.01	132.1	67.9	27.16	21.28	1
P00387	NADH-cytochrome b5 reductase 3 OS=Homo sapiens OX=9606 GN=CYB5R3 PE=1 SV=3	0	222.881	69	13	915	13	301	34.2	7.59	2419.78	13	CYB5R3	B1AHF2; B7Z7L3; hsa:1727; O75675; P00387; Q8TDL8; Q8WTS8; Q9UEN4; Q9UEN5; Q9UL55; Q9UL56	0	1.11	0.992504	70.37	93.3	106.7	23.39	45.11	1
P78371	T-complex protein 1 subunit beta OS=Homo sapiens OX=9606 GN=CCT2 PE=1 SV=4	0	222.432	54	23	1458	23	535	57.5	6.46	3614.85	23	CCT2	A8K402; B5BTY7; B7Z243; B7Z7K4; B7ZAT2; hsa:10576; P78371; Q14D36; Q6IAT3	0	2.051	0.896215	50.13	72.7	127.3	25.09	21.84	1
P30153	Serine/threonine-protein phosphatase 2A 65 kDa regulatory subunit A alpha isoform OS=Homo sapiens OX=9606 GN=PPP2R1A PE=1 SV=4	0	222.37	51	25	1217	18	589	65.3	5.11	3112.08	25	PPP2R1A	hsa:5518; P30153; Q13773; Q6ICQ3; Q96DH3	6	1.533	0.975926	68.78	78.9	121.1	17.83	39.54	1	Met-loss+Acetyl [N-Term]
Q9P2J5	Leucine--tRNA ligase, cytoplasmic OS=Homo sapiens OX=9606 GN=LARS1 PE=1 SV=2	0	222.329	34	33	792	33	1176	134.4	7.3	1025.11	33	LARS1	A2RRR4; A7E266; B4DJ10; hsa:51520; Q2TU79; Q9NSE1; Q9P2J5	0	2.168	0.85856	52.24	46.2	153.8	33.56	24.6	1
P11277	Spectrin beta chain, erythrocytic OS=Homo sapiens OX=9606 GN=SPTB PE=1 SV=5	0	222.003	25	40	664	33	2137	246.3	5.27	1008.83	40	SPTB	hsa:6710; P11277; Q15510; Q15519	0	0.842	0.940848	59.63	110.6	89.4	20.1	29.26	1
Q14571	Inositol 1,4,5-trisphosphate receptor type 2 OS=Homo sapiens OX=9606 GN=ITPR2 PE=1 SV=2	0	221.885	21	40	412	37	2701	307.9	6.43	622.07	40	ITPR2	hsa:3709; O94773; Q14571	3	1.484	0.981272	73.02	87.9	112.1	18.58	63.36	1
P09525	Annexin A4 OS=Homo sapiens OX=9606 GN=ANXA4 PE=1 SV=4	0	221.783	83	26	2394	26	319	35.9	6.13	6206.14	26	ANXA4	B4DDF9; hsa:307; P09525; Q6LES2; Q96F33; Q9BWK1	0	1.132	0.992504	54.28	97.3	102.7	24.86	40.13	1
O75390	Citrate synthase, mitochondrial OS=Homo sapiens OX=9606 GN=CS PE=1 SV=2	0	221.717	49	16	1095	16	466	51.7	8.32	2287.11	16	CS	hsa:1431; O75390; Q71UT9; Q7KZH0; Q96FZ8; Q9BWN8	0	1.677	0.961492	60.73	70.3	129.7	13.12	29.87	1
P21695	Glycerol-3-phosphate dehydrogenase [NAD(+)], cytoplasmic OS=Homo sapiens OX=9606 GN=GPD1 PE=1 SV=4	0	221.644	70	18	943	18	349	37.5	6.18	2263.33	18	GPD1	F8W1L5; hsa:2819; P21695; Q8N1B0	0	0.262	0.0170834	119.59	185.7	14.3	47.51	145.03	1
P07996	Thrombospondin-1 OS=Homo sapiens OX=9606 GN=THBS1 PE=1 SV=2	0	221.378	29	26	783	25	1170	129.3	4.94	1467.97	26	THBS1	A8K6H4; B4E3J7; B9EGH6; hsa:7057; P07996; Q15667; Q59E99	1	1.134	0.992504	88.18	106.2	93.8	59.23	72.19	1
Q03154	Aminoacylase-1 OS=Homo sapiens OX=9606 GN=ACY1 PE=1 SV=1	0	221.289	63	20	1682	20	408	45.9	6.18	3925.39	20	ACY1	C9J6I6; C9J9D8; C9JWD4; hsa:95; Q03154	0	0.689	0.82972	101.32	144.2	55.8	32.83	100.87	1
Q99613	Eukaryotic translation initiation factor 3 subunit C OS=Homo sapiens OX=9606 GN=EIF3C PE=1 SV=1	0	221.03	32	25	1007	25	913	105.3	5.68	2160.03	25	EIF3C	A8K7Z0; B2RXG3; B4E1D5; H3BRV0; hsa:8663; O00215; Q99613; Q9BW98	0	1.733	0.953398	53.94	87.9	112.1	8.51	32.11	1
P11509	Cytochrome P450 2A6 OS=Homo sapiens OX=9606 GN=CYP2A6 PE=1 SV=4	0	220.911	53	24	587	13	494	56.5	9.19	1583.92	24	CYP2A6	A7YAE5; B2R7F6; hsa:1548; P00190; P10890; P11509; Q16803; Q4VAT9; Q4VAU0; Q4VAU1; Q9H1Z7; Q9UCU0; Q9UK48	11	0.301	0.0426122	107.56	189.6	10.4	77.45	103.26	1
P04792	Heat shock protein beta-1 OS=Homo sapiens OX=9606 GN=HSPB1 PE=1 SV=2	0	220.229	82	16	1547	16	205	22.8	6.4	4938.65	16	HSPB1	B2R4N8; hsa:3315; P04792; Q6FI47; Q96C20; Q96EI7; Q9UC31; Q9UC34; Q9UC35; Q9UC36	0	2.006	0.904782	103.16	63.8	136.2	34.97	74.94	1
Q9NQR4	Omega-amidase NIT2 OS=Homo sapiens OX=9606 GN=NIT2 PE=1 SV=1	0	219.675	74	20	1207	20	276	30.6	7.21	3004.42	20	NIT2	B2R9A3; D3DN47; hsa:56954; Q8WUF0; Q9NQR4	0	0.563	0.588055	62.12	120	80	20.28	31.02	1	Met-loss+Acetyl [N-Term]
Q06520	Sulfotransferase 2A1 OS=Homo sapiens OX=9606 GN=SULT2A1 PE=1 SV=3	0	219.252	68	19	2030	19	285	33.8	5.95	5802.43	19	SULT2A1	hsa:6822; Q06520	0	0.453	0.311807	119.67	174.4	25.6	33.87	111.7	1
P10632	Cytochrome P450 2C8 OS=Homo sapiens OX=9606 GN=CYP2C8 PE=1 SV=2	0	218.652	65	22	703	20	490	55.8	8.5	1547.19	22	CYP2C8	A8K9N8; B0AZN2; B7Z1F6; hsa:1558; P10632; Q5VX93; Q8WWB1; Q9UCZ9	1	0.274	0.0227239	113.35	174.1	25.9	41.98	57.24	1
P09960	Leukotriene A-4 hydrolase OS=Homo sapiens OX=9606 GN=LTA4H PE=1 SV=2	0	218.583	48	23	1440	23	611	69.2	6.18	3217.87	23	LTA4H	B4DNQ9; F8VV40; hsa:4048; P09960; Q6IAT6; Q9UCT7	0	0.963	0.972735	47.95	120.9	79.1	18.51	29.92	1
P36578	60S ribosomal protein L4 OS=Homo sapiens OX=9606 GN=RPL4 PE=1 SV=5	0	218.391	44	22	1150	22	427	47.7	11.06	2493.17	22	RPL4	A8K502; hsa:6124; P36578; P39029; Q4VBR0; Q969Z9	0	1.792	0.943303	86.09	59.9	140.1	18.2	44.66	1	Met-loss+Acetyl [N-Term]
P55884	Eukaryotic translation initiation factor 3 subunit B OS=Homo sapiens OX=9606 GN=EIF3B PE=1 SV=3	0	218.316	46	27	861	27	814	92.4	5	1665.75	27	EIF3B	A4D208; hsa:8662; P55884; Q2NL77; Q9UMF9	0	1.854	0.938291	56.94	70.2	129.8	29.91	19.85	1
Q9Y5K6	CD2-associated protein OS=Homo sapiens OX=9606 GN=CD2AP PE=1 SV=1	0	218.16	46	25	517	25	639	71.4	6.4	978.3	25	CD2AP	A6NL34; hsa:23607; Q5VYA3; Q9UG97; Q9Y5K6	0	2.314	0.787714	98.96	85.7	114.3	7.12	51.37	1
P13489	Ribonuclease inhibitor OS=Homo sapiens OX=9606 GN=RNH1 PE=1 SV=2	0	217.594	59	18	1323	18	461	49.9	4.82	3480.29	18	RNH1	hsa:6050; P13489; Q8IZK8; Q96FD7; Q9BQ80; Q9UDK6	0	1.138	0.992504	55.21	122.1	77.9	32.9	21.45	1	Met-loss+Acetyl [N-Term]
Q05682	Caldesmon OS=Homo sapiens OX=9606 GN=CALD1 PE=1 SV=3	0	216.884	28	22	966	22	793	93.2	5.66	2205.02	22	CALD1	A8K0X1; hsa:800; Q05682; Q13978; Q13979; Q14741; Q14742; Q9UD91	0	0.548	0.550345	67.45	126.9	73.1	37.79	49.65	1
P04424	Argininosuccinate lyase OS=Homo sapiens OX=9606 GN=ASL PE=1 SV=4	0	216.085	47	22	1493	22	464	51.6	6.48	3232.17	22	ASL	E7EMI0; E9PE48; hsa:435; P04424; Q6LDS5; Q96HS2	0	0.479	0.379017	93.3	147.5	52.5	33.02	88.81	1
P35606	Coatomer subunit beta' OS=Homo sapiens OX=9606 GN=COPB2 PE=1 SV=2	0	215.831	35	25	909	25	906	102.4	5.27	1847.67	25	COPB2	B4DZI8; hsa:9276; P35606	0	1.332	0.99383	54.68	85	115	18.18	21.42	1
O14841	5-oxoprolinase OS=Homo sapiens OX=9606 GN=OPLAH PE=1 SV=3	0	215.817	33	30	1076	30	1288	137.4	6.58	2095.54	30	OPLAH	A5PKY8; hsa:26873; O14841; Q75W65; Q9Y4Q0	0	1.385	0.992504	75.54	88.6	111.4	19.14	43.64	1
P50990	T-complex protein 1 subunit theta OS=Homo sapiens OX=9606 GN=CCT8 PE=1 SV=4	0	215.477	62	29	1895	29	548	59.6	5.6	4683.54	29	CCT8	A6NN54; B4DEM7; B4DQH4; hsa:10694; P50990; Q4VBP8	0	2.092	0.883208	50.38	70.1	129.9	16.53	25.04	1
P01833	Polymeric immunoglobulin receptor OS=Homo sapiens OX=9606 GN=PIGR PE=1 SV=4	0	215.453	50	25	357	25	764	83.2	5.74	709.19	25	PIGR	hsa:5284; P01833; Q68D81; Q8IZY7	0	1.288	0.996481	97.58	131.1	68.9	39.19	91.83	1
Q9NZN3	EH domain-containing protein 3 OS=Homo sapiens OX=9606 GN=EHD3 PE=1 SV=2	0	215.22	56	23	728	12	535	60.8	6.57	1408.99	23	EHD3	B4DFR5; D6W574; hsa:30845; Q8N514; Q9NZB3; Q9NZN3	1	0.656	0.774143	49.52	154.7	45.3	29.35	29.94	1	Acetyl [N-Term]
Q9BUF5	Tubulin beta-6 chain OS=Homo sapiens OX=9606 GN=TUBB6 PE=1 SV=1	0	214.886	52	17	2393	5	446	49.8	4.88	4457.24	17	TUBB6	B3KM76; hsa:84617; Q9BUF5; Q9HA42	0	0.821	0.886404	61.31	107	93	54.16	49.85	1
P32119	Peroxiredoxin-2 OS=Homo sapiens OX=9606 GN=PRDX2 PE=1 SV=5	0	214.867	76	10	1075	9	198	21.9	5.97	2780.63	10	PRDX2	A8K0C0; hsa:7001; P31945; P32118; P32119; P35701; Q6FHG4; Q92763; Q9UC23	0	0.978	0.972752	76.18	89.3	110.7	28.26	32.81	1
P07942	Laminin subunit beta-1 OS=Homo sapiens OX=9606 GN=LAMB1 PE=1 SV=2	0	214.842	27	34	573	34	1786	197.9	4.94	924.92	34	LAMB1	hsa:3912; P07942; Q14D91	0	1.402	0.9904	79.38	77.6	122.4	44.35	23.78	1
P23526	Adenosylhomocysteinase OS=Homo sapiens OX=9606 GN=AHCY PE=1 SV=4	0	214.759	55	24	1690	22	432	47.7	6.34	4473.85	24	AHCY	A8K307; B3KUN3; E1P5P2; F5H737; hsa:191; P23526; Q96A36	2	1.101	0.9904	71.63	107.4	92.6	17.21	43.19	1	Met-loss+Acetyl [N-Term]
O43175	D-3-phosphoglycerate dehydrogenase OS=Homo sapiens OX=9606 GN=PHGDH PE=1 SV=4	0	213.897	56	21	1381	21	533	56.6	6.71	3162.41	21	PHGDH	B2RD08; hsa:26227; O43175; Q5SZU3; Q9BQ01	0	0.511	0.467161	71.59	146.2	53.8	43.61	61.33	1	Met-loss+Acetyl [N-Term]
Q15165	Serum paraoxonase/arylesterase 2 OS=Homo sapiens OX=9606 GN=PON2 PE=1 SV=4	0	213.895	61	10	547	10	354	39.4	5.6	1526.02	10	PON2	A4D1H7; B2RCP9; B4DJD5; hsa:5445; O15114; O15115; O75856; Q15165; Q5FBX7; Q86YL0	0	1.892	0.928829	74.18	59.8	140.2	46.12	50.12	1
P49773	Adenosine 5'-monophosphoramidase HINT1 OS=Homo sapiens OX=9606 GN=HINT1 PE=1 SV=2	0	213.469	72	8	1432	8	126	13.8	6.95	4960.94	8	HINT1	hsa:3094; P49773; Q9H5W8	0	1.486	0.980663	74.84	80.2	119.8	10.87	42.95	1
P55786	Puromycin-sensitive aminopeptidase OS=Homo sapiens OX=9606 GN=NPEPPS PE=1 SV=2	0	213.061	44	28	1171	28	919	103.2	5.72	2399.95	28	NPEPPS	B7Z463; hsa:9520; P55786; Q6P145; Q9NP16; Q9UEM2	0	1.458	0.984689	50.08	81.9	118.1	12.21	33.27	1
P08865	40S ribosomal protein SA OS=Homo sapiens OX=9606 GN=RPSA PE=1 SV=4	0	212.812	66	18	1463	18	295	32.8	4.87	3696.49	18	RPSA	hsa:3921; P08865; P11085; P12030; Q16471; Q6IPD1; Q6IPD2; Q6NSD1; Q6NXQ8; Q86VC0	0	1.562	0.975804	55.81	86	114	9.91	35.39	1	Acetyl [N-Term]
Q1KMD3	Heterogeneous nuclear ribonucleoprotein U-like protein 2 OS=Homo sapiens OX=9606 GN=HNRNPUL2 PE=1 SV=1	0	212.539	37	26	1035	26	747	85.1	4.91	2133.95	26	HNRNPUL2	hsa:221092; Q1KMD3; Q8N3B3	0	1.695	0.957664	75.01	79.9	120.1	34.25	33.88	1
P11216	Glycogen phosphorylase, brain form OS=Homo sapiens OX=9606 GN=PYGB PE=1 SV=5	0	212.508	39	34	1148	26	843	96.6	6.86	2033.36	34	PYGB	hsa:5834; P11216; Q96AK1; Q9NPX8	0	1.086	0.98901	60.38	95.3	104.7	15.94	37.51	1
P48735	Isocitrate dehydrogenase [NADP], mitochondrial OS=Homo sapiens OX=9606 GN=IDH2 PE=1 SV=2	0	211.93	56	25	1854	22	452	50.9	8.69	3566.48	25	IDH2	B2R6L6; B4DFL2; hsa:3418; P48735; Q96GT3	0	0.534	0.519566	67.23	137	63	20.15	74.65	1
P31948	Stress-induced-phosphoprotein 1 OS=Homo sapiens OX=9606 GN=STIP1 PE=1 SV=1	0	211.478	47	28	1213	28	543	62.6	6.8	2446.05	28	STIP1	B4DM70; F5H0T1; G3XAD8; hsa:10963; P31948; Q3ZCU9; Q5TZU9	0	1.72	0.956013	87.54	66.4	133.6	23.05	37.33	1	Acetyl [N-Term]
Q8N0X4	Citramalyl-CoA lyase, mitochondrial OS=Homo sapiens OX=9606 GN=CLYBL PE=1 SV=2	0	211.444	59	18	596	18	340	37.3	8.73	1382.57	18	CLYBL	hsa:171425; Q5W0F7; Q8N0X4; Q8TDH8	0	1.086	0.98901	102.66	140.8	59.2	50.91	165.41	1
P09210	Glutathione S-transferase A2 OS=Homo sapiens OX=9606 GN=GSTA2 PE=1 SV=4	0	211.425	70	19	1410	3	222	25.6	8.59	2427.87	19	GSTA2	hsa:2939; P09210; Q12759; Q16491; Q9NTY6	0	0.589	0.643584	127.15	178.6	21.4	104.25	74.36	1	Met-loss+Acetyl [N-Term]
P06727	Apolipoprotein A-IV OS=Homo sapiens OX=9606 GN=APOA4 PE=1 SV=4	0	210.467	70	30	823	30	396	45.3	5.38	1410.5	30	APOA4	A8MSL6; hsa:337; P06727; Q14CW8; Q6Q787	0	2.148	0.86941	85.33	64.9	135.1	28.15	60.4	1
Q9UJM8	2-Hydroxyacid oxidase 1 OS=Homo sapiens OX=9606 GN=HAO1 PE=1 SV=1	0	210.212	72	19	1887	19	370	40.9	8.09	4036.79	19	HAO1	hsa:54363; Q14CQ0; Q9UJM8; Q9UPZ0; Q9Y3I7	0	0.645	0.759982	107.77	164.3	35.7	31.95	101.89	1
P22033	Methylmalonyl-CoA mutase, mitochondrial OS=Homo sapiens OX=9606 GN=MMUT PE=1 SV=4	0	210.108	50	24	1077	24	750	83.1	6.93	2440.47	24	MMUT	A8K953; hsa:4594; P22033; Q5SYZ3; Q96B11; Q9UD64	0	0.705	0.853141	67.38	132.7	67.3	31.11	57.68	1
Q16836	Hydroxyacyl-coenzyme A dehydrogenase, mitochondrial OS=Homo sapiens OX=9606 GN=HADH PE=1 SV=3	0	209.65	69	13	1528	13	314	34.3	8.85	3756.7	13	HADH	hsa:3033; J3KQ17; O00324; O00397; O00753; Q16836; Q4W5B4	0	0.452	0.309889	72.4	148.3	51.7	24.69	32.77	1
Q9NY65	Tubulin alpha-8 chain OS=Homo sapiens OX=9606 GN=TUBA8 PE=1 SV=1	0	209.146	41	18	1578	2	449	50.1	5.06	4566.28	18	TUBA8	B2RCX2; B3KPW9; B4DWG3; hsa:51807; Q2M3N4; Q9NY65	0	1.865	0.940848	51.98	65.6	134.4	42.67	27	1
P78417	Glutathione S-transferase omega-1 OS=Homo sapiens OX=9606 GN=GSTO1 PE=1 SV=2	0	208.639	71	22	1634	22	241	27.5	6.6	3311.95	22	GSTO1	D3DRA3; F5H7H0; hsa:9446; P78417; Q5TA03; Q7Z3T2	0	0.866	0.945498	75.4	117.3	82.7	24.19	48.73	1
P50570	Dynamin-2 OS=Homo sapiens OX=9606 GN=DNM2 PE=1 SV=2	0	208.633	44	32	1114	26	870	98	7.44	2006.08	32	DNM2	A8K1B6; E7EV30; E9PEQ4; hsa:1785; K7ESI9; P50570; Q5I0Y0; Q7Z5S3; Q9UPH4	6	1.545	0.975926	61.99	69.2	130.8	33.53	29.55	1
O76054	SEC14-like protein 2 OS=Homo sapiens OX=9606 GN=SEC14L2 PE=1 SV=1	0	208.621	61	22	755	22	403	46.1	7.84	1669.23	22	SEC14L2	B7Z8Q1; F5H3U4; hsa:23541; O76054; Q53EQ2; Q6PD61; Q9ULN4	0	0.437	0.270736	78.3	146.2	53.8	23.62	38.48	1
P30048	Thioredoxin-dependent peroxide reductase, mitochondrial OS=Homo sapiens OX=9606 GN=PRDX3 PE=1 SV=3	0	208.399	50	12	1573	12	256	27.7	7.78	4051.67	12	PRDX3	B2R7Z0; D3DRC9; E9PH29; hsa:10935; P30048; P35690; Q0D2H1; Q13776; Q5T5V2; Q96HK4	0	0.904	0.957629	68.45	105.3	94.7	10.76	43.22	1
Q9NNW7	Thioredoxin reductase 2, mitochondrial OS=Homo sapiens OX=9606 GN=TXNRD2 PE=1 SV=3	0	208.063	49	16	617	15	524	56.5	7.5	1421.42	16	TXNRD2	hsa:10587; O95840; Q96IJ2; Q9H2Z5; Q9NNW7; Q9NZV3; Q9NZV4; Q9P2Y0; Q9P2Y1; Q9UQU8	0	1.066	0.984689	78.31	89.9	110.1	30.11	47.34	1
O00567	Nucleolar protein 56 OS=Homo sapiens OX=9606 GN=NOP56 PE=1 SV=4	0	207.733	61	27	688	27	594	66	9.19	1135.48	27	NOP56	hsa:10528; O00567; Q2M3T6; Q9NQ05	0	2.232	0.830252	68.33	48.2	151.8	25.76	34.18	1	Met-loss [N-Term]
Q9Y5B9	FACT complex subunit SPT16 OS=Homo sapiens OX=9606 GN=SUPT16H PE=1 SV=1	0	207.417	31	26	579	26	1047	119.8	5.66	1050.47	26	SUPT16H	hsa:11198; Q6GMT8; Q6P2F1; Q6PJM1; Q9NRX0; Q9Y5B9	0	1.829	0.940848	72.58	38.9	161.1	79.49	32.84	1	Met-loss+Acetyl [N-Term]
P31930	Cytochrome b-c1 complex subunit 1, mitochondrial OS=Homo sapiens OX=9606 GN=UQCRC1 PE=1 SV=3	0	206.193	48	16	906	16	480	52.6	6.37	2626.64	16	UQCRC1	B2R7R8; hsa:7384; P31930; Q96DD2	0	1.212	0.998585	56.61	104	96	18.49	84.15	1
Q58FF7	Putative heat shock protein HSP 90-beta-3 OS=Homo sapiens OX=9606 GN=HSP90AB3P PE=5 SV=1	0	206.01	28	29	3086	2	597	68.3	4.79	6243.38	29	HSP90AB3P	Q58FF7	0	0.967	0.928554	67.49	101.7	98.3		58.59	1
P63104	14-3-3 protein zeta/delta OS=Homo sapiens OX=9606 GN=YWHAZ PE=1 SV=1	0	205.566	84	24	1782	19	245	27.7	4.79	4292.4	24	YWHAZ	A8K1N0; B7Z465; hsa:7534; P29213; P29312; P63104; Q32P43; Q5XJ08; Q6GPI2; Q6IN74; Q6NUR9; Q6P3U9; Q86V33	8	1.592	0.972752	69.75	70	130	37.45	36.15	1	Acetyl [N-Term]
Q15155	Nodal modulator 1 OS=Homo sapiens OX=9606 GN=NOMO1 PE=1 SV=5	0	205.539	35	23	677	1	1222	134.2	5.81	1222.75	23	NOMO1	hsa:23420; P78421; Q15155; Q8IW21; Q96DG0	0	100	2.00326e-16			200		46.62	1
Q93008	Probable ubiquitin carboxyl-terminal hydrolase FAF-X OS=Homo sapiens OX=9606 GN=USP9X PE=1 SV=4	0	204.54	22	39	802	39	2554	290.3	5.8	938.75	39	USP9X	hsa:8239; O75550; Q8WWT3; Q8WX12; Q93008	0	1.343	0.99383	66.45	82.9	117.1	38.45	56.79	1
P35222	Catenin beta-1 OS=Homo sapiens OX=9606 GN=CTNNB1 PE=1 SV=1	0	204.358	41	21	802	17	781	85.4	5.86	1912.06	21	CTNNB1	A8K1L7; hsa:1499; P35222; Q8NEW9; Q8NI94; Q9H391	0	1.656	0.964205	90.6	79.8	120.2	26.41	76.82	1
P34897	Serine hydroxymethyltransferase, mitochondrial OS=Homo sapiens OX=9606 GN=SHMT2 PE=1 SV=3	0	204.113	52	21	1583	20	504	56	8.53	3765.12	21	SHMT2	B7Z9F1; E7EQ19; E7EU43; hsa:6472; O00740; P34897; Q8N1A5	0	0.861	0.945472	66.73	118.4	81.6	25.86	51.12	1
P56470	Galectin-4 OS=Homo sapiens OX=9606 GN=LGALS4 PE=1 SV=1	0	203.471	50	14	1539	14	323	35.9	9.16	3468.98	14	LGALS4	hsa:3960; P56470	0	3.068	0.435871	86.88	45.2	154.8	18.9	58.89	1	Met-loss+Acetyl [N-Term]
P42224	Signal transducer and activator of transcription 1-alpha/beta OS=Homo sapiens OX=9606 GN=STAT1 PE=1 SV=2	0	203.281	48	28	1471	28	750	87.3	6.05	3056.18	28	STAT1	A8K989; B2RCA0; D2KFR8; D3DPI7; hsa:6772; P42224; Q53S88; Q53XW4; Q68D00; Q9UDL5	0	1.077	0.98865	62.69	95.2	104.8	28.53	37.45	1
O00410	Importin-5 OS=Homo sapiens OX=9606 GN=IPO5 PE=1 SV=4	0	203.264	34	24	657	24	1097	123.6	4.94	1205.54	24	IPO5	B4DZA0; hsa:3843; O00410; O15257; Q5T578; Q86XC7	0	1.703	0.957629	63.4	85.9	114.1	23.28	54.25	1
Q16531	DNA damage-binding protein 1 OS=Homo sapiens OX=9606 GN=DDB1 PE=1 SV=1	0	203.209	31	28	1155	28	1140	126.9	5.26	2289.23	28	DDB1	A6NG77; B2R648; B4DG00; hsa:1642; O15176; Q13289; Q16531; Q58F96	0	1.253	0.998585	56.27	150.4	49.6	50.83	41.66	1
P27338	Amine oxidase [flavin-containing] B OS=Homo sapiens OX=9606 GN=MAOB PE=1 SV=3	0	203.038	59	23	1150	19	520	58.7	7.5	2494.67	23	MAOB	B2R6R3; B7Z5H3; D3DWC3; hsa:4129; P27338; Q7Z6S2	4	0.655	0.774143	111.59	149.3	50.7	35.11	81.13	1
P04217	Alpha-1B-glycoprotein OS=Homo sapiens OX=9606 GN=A1BG PE=1 SV=4	0	202.102	53	15	902	15	495	54.2	5.86	2314.13	15	A1BG	A8K052; hsa:1; P04217; Q68CK0; Q8IYJ6; Q96P39	0	1.287	0.996481	58.13	92.9	107.1	20.65	58.43	1
O14980	Exportin-1 OS=Homo sapiens OX=9606 GN=XPO1 PE=1 SV=1	0	201.844	26	20	749	20	1071	123.3	6.06	1707.69	20	XPO1	A6NL14; A8K1K5; D6W5E2; hsa:7514; O14980; Q63HP8; Q68CP3; Q99433	0	1.99	0.910953	65.29	56.3	143.7	48.04	52.99	1
P51991	Heterogeneous nuclear ribonucleoprotein A3 OS=Homo sapiens OX=9606 GN=HNRNPA3 PE=1 SV=2	0	201.47	51	20	1259	19	378	39.6	9.01	3447.32	20	HNRNPA3	D3DPF4; hsa:220988; P51991; Q53RW7; Q6URK5	0	2.247	0.82299	70.49	51.8	148.2	36.88	34.71	1	Acetyl [N-Term]
P14314	Glucosidase 2 subunit beta OS=Homo sapiens OX=9606 GN=PRKCSH PE=1 SV=2	0	201.46	53	21	1344	21	528	59.4	4.41	3182.08	21	PRKCSH	A8K318; hsa:5589; P14314; Q96BU9; Q96D06; Q9P0W9	0	1.09	0.98917	50.63	94.4	105.6	24.41	34.32	1
O00299	Chloride intracellular channel protein 1 OS=Homo sapiens OX=9606 GN=CLIC1 PE=1 SV=4	0	201.386	85	19	1377	19	241	26.9	5.17	3440.41	19	CLIC1	hsa:1192; O00299; Q15089; Q502X1	0	1.948	0.916313	74.37	69.5	130.5	39.6	37.08	1	Met-loss+Acetyl [N-Term]
O95479	GDH/6PGL endoplasmic bifunctional protein OS=Homo sapiens OX=9606 GN=H6PD PE=1 SV=2	0	201.335	42	26	1022	26	791	88.8	7.3	2376.31	26	H6PD	hsa:9563; O95479; Q4TT33; Q66I35; Q68DT3; R4GMU1	0	0.648	0.760228	67.76	122.5	77.5	24.25	39.06	1
Q15436	Protein transport protein Sec23A OS=Homo sapiens OX=9606 GN=SEC23A PE=1 SV=2	0	201.21	46	22	995	20	765	86.1	7.08	2394.72	22	SEC23A	B2R5P4; B3KXI2; hsa:10484; Q15436; Q8NE16	3	1.028	0.980663	53.24	110.8	89.2	28.29	40.86	1
Q16134	Electron transfer flavoprotein-ubiquinone oxidoreductase, mitochondrial OS=Homo sapiens OX=9606 GN=ETFDH PE=1 SV=2	0	200.475	43	20	1007	20	617	68.5	7.55	2208.25	20	ETFDH	B4E3R9; hsa:2110; J3KND9; Q16134; Q7Z347	0	0.269	0.0205783	91.19	163.2	36.8	25.37	70.67	1
P00734	Prothrombin OS=Homo sapiens OX=9606 GN=F2 PE=1 SV=2	0	200.268	43	24	1123	24	622	70	5.9	2585.61	24	F2	B2R7F7; B4E1A7; hsa:2147; P00734; Q4QZ40; Q53H04; Q53H06; Q69EZ7; Q7Z7P3; Q9UCA1	0	2.299	0.796835	68.73	44.6	155.4	244.69	117.84	1
P43243	Matrin-3 OS=Homo sapiens OX=9606 GN=MATR3 PE=1 SV=2	0	200.181	33	23	984	23	847	94.6	6.25	2219.62	23	MATR3	B7ZAV5; D3DQC3; hsa:9782; P43243; Q9UHW0; Q9UQ27	0	2.366	0.764914	70.07	53.8	146.2	33.11	29.97	1
P61981	14-3-3 protein gamma OS=Homo sapiens OX=9606 GN=YWHAG PE=1 SV=2	0	200.124	66	16	1016	12	247	28.3	4.89	2527.78	16	YWHAG	hsa:7532; O70457; P35214; P61981; Q6FH52; Q9UDP2; Q9UN99	0	1.856	0.938291	70.36	76.2	123.8	16.93	34.99	1	Met-loss+Acetyl [N-Term]
O00571	ATP-dependent RNA helicase DDX3X OS=Homo sapiens OX=9606 GN=DDX3X PE=1 SV=3	0	200.088	44	26	1081	5	662	73.2	7.18	2248.75	26	DDX3X	A8K538; B4E3E8; hsa:1654; O00571; O15536	22	1.788	0.94504	67.22	71.1	128.9	23.04	31.3	1
P08684	Cytochrome P450 3A4 OS=Homo sapiens OX=9606 GN=CYP3A4 PE=1 SV=4	0	200.061	47	23	800	11	503	57.3	8.1	1607.21	23	CYP3A4	hsa:1576; P05184; P08684; Q16757; Q9UK50	14	0.404	0.192757	116.57	187.7	12.3	56.02	152.59	1
O60437	Periplakin OS=Homo sapiens OX=9606 GN=PPL PE=1 SV=4	0	200.004	26	38	555	38	1756	204.6	5.6	902.77	38	PPL	hsa:5493; O60314; O60437; O60454; Q14C98	0	0.947	0.968009	78.9	109.8	90.2	14.69	50.33	1
P27144	Adenylate kinase 4, mitochondrial OS=Homo sapiens OX=9606 GN=AK4 PE=1 SV=1	0	199.991	74	13	1012	13	223	25.3	8.4	2038.89	13	AK4	B2R927; D3DQ62; hsa:205; P27144; Q6IBH4; Q6NXQ5; Q8IUU9	0	0.855	0.941095	71.26	96	104	34.56	29.35	1
P28331	NADH-ubiquinone oxidoreductase 75 kDa subunit, mitochondrial OS=Homo sapiens OX=9606 GN=NDUFS1 PE=1 SV=3	0	199.881	44	26	1388	26	727	79.4	6.23	2952.85	26	NDUFS1	B4DIN9; B4DJA0; B4DPG1; B4DUC1; E7ENF3; hsa:4719; P28331; Q53TR8; Q8N1C4; Q8TCC9	0	0.876	0.948069	63.55	108.6	91.4	24.85	42.57	1
P02549	Spectrin alpha chain, erythrocytic 1 OS=Homo sapiens OX=9606 GN=SPTA1 PE=1 SV=5	0	199.293	22	36	424	36	2419	279.8	5.05	564.92	36	SPTA1	hsa:6708; P02549; Q15514; Q5VYL1; Q5VYL2; Q6LDY5	0	0.904	0.957664	63.96	115.4	84.6	29.7	50.67	1
Q96AC1	Fermitin family homolog 2 OS=Homo sapiens OX=9606 GN=FERMT2 PE=1 SV=1	0	199.055	38	21	753	19	680	77.8	6.7	1557.09	21	FERMT2	B5TJY2; hsa:10979; Q14840; Q86TY7; Q96AC1	2	1.085	0.98901	74.46	108	92	24.92	59.83	1
P35527	Keratin, type I cytoskeletal 9 OS=Homo sapiens OX=9606 GN=KRT9 PE=1 SV=3	0	198.859	48	22	592	22	623	62	5.24	1035.5	22	KRT9	hsa:3857; O00109; P35527; Q0IJ47; Q14665	0	1.132	0.992504	67.76	93.4	106.6	27.87	77.06	1
Q6NVY1	3-hydroxyisobutyryl-CoA hydrolase, mitochondrial OS=Homo sapiens OX=9606 GN=HIBCH PE=1 SV=2	0	198.809	51	21	933	21	386	43.5	8.19	2101.2	21	HIBCH	D3DPI4; hsa:26275; Q53GA8; Q53GF2; Q53RF7; Q53TC6; Q6NVY1; Q92931; Q9BS94	0	0.655	0.774143	86.44	132	68	42.38	63.93	1
P02679	Fibrinogen gamma chain OS=Homo sapiens OX=9606 GN=FGG PE=1 SV=3	0	198.689	45	22	1452	22	453	51.5	5.62	3605.56	22	FGG	A8K057; hsa:2266; P02679; P04469; P04470; Q53Y18; Q96A14; Q96KJ3; Q9UC62; Q9UC63; Q9UCF3	0	1.118	0.992504	77.86	93.7	106.3	27.16	69.39	1
P01859	Immunoglobulin heavy constant gamma 2 OS=Homo sapiens OX=9606 GN=IGHG2 PE=1 SV=2	0	198.678	63	20	2150	13	326	35.9	7.59	4529.78	20			2	1.184	0.996481	104.26	101.7	98.3	37.35	74	1
P39023	60S ribosomal protein L3 OS=Homo sapiens OX=9606 GN=RPL3 PE=1 SV=2	0	198.311	41	18	940	18	403	46.1	10.18	2458.79	18	RPL3	B2RDV9; hsa:6122; P39023; Q15548; Q5I0G0	0	2.012	0.902141	93.47	47.9	152.1	32.73	44.02	1
Q9UHK6	Alpha-methylacyl-CoA racemase OS=Homo sapiens OX=9606 GN=AMACR PE=1 SV=2	0	198.192	60	21	570	21	382	42.4	6.44	1315.11	21	AMACR	A5YM47; B8Y916; B8Y918; F8W9N1; hsa:23600; O43673; Q3KT79; Q96GH1; Q9UHK6; Q9Y3Q1	0	1.26	0.998585	106.63	93.7	106.3	41.55	110.01	1
P55263	Adenosine kinase OS=Homo sapiens OX=9606 GN=ADK PE=1 SV=2	0	198.12	63	18	747	18	362	40.5	6.7	1480.78	18	ADK	B7Z783; B7Z800; hsa:132; O00741; O00742; P55263; Q16710; Q5JQ10; Q5JQ11; Q9BTN2	0	0.839	0.940848	75.9	107.5	92.5	21.5	64.56	1
Q14152	Eukaryotic translation initiation factor 3 subunit A OS=Homo sapiens OX=9606 GN=EIF3A PE=1 SV=1	0	198.072	27	35	1047	35	1382	166.5	6.79	2004.7	35	EIF3A	B1AMV5; B4DYS1; F5H335; hsa:8661; O00653; Q14152; Q15778	0	1.769	0.945942	56.5	88.7	111.3	15.45	29.57	1	Met-loss [N-Term]
P49792	E3 SUMO-protein ligase RanBP2 OS=Homo sapiens OX=9606 GN=RANBP2 PE=1 SV=2	0	197.935	19	40	464	40	3224	358	6.2	531.19	40	RANBP2	hsa:5903; P49792; Q13074; Q15280; Q53TE2; Q59FH7	0	1.342	0.99383	72.62	89.4	110.6	30.1	30.75	1
Q8NBX0	Saccharopine dehydrogenase-like oxidoreductase OS=Homo sapiens OX=9606 GN=SCCPDH PE=1 SV=1	0	197.422	60	14	1245	14	429	47.1	9.14	3734.13	14	SCCPDH	hsa:51097; Q8NBX0; Q8TAR0; Q9Y363	0	1.134	0.992504	82.1	92.5	107.5	21.61	55.69	1	Met-loss+Acetyl [N-Term]
A0A0B4J2D5	Putative glutamine amidotransferase-like class 1 domain-containing protein 3B, mitochondrial OS=Homo sapiens OX=9606 GN=GATD3B PE=5 SV=1	0	197.256	51	9	825	9	268	28.1	8.27	2517.2	9	GATD3B	A0A0B4J2D5; A6NFJ6; A6NJY7; hsa:8209; O00650; O00660; O15011; O15012; P30042; P55346; P78474; Q92505; Q92507	0	0.618	0.709369	76.21	126.5	73.5	25.11	56.06	1
P48506	Glutamate--cysteine ligase catalytic subunit OS=Homo sapiens OX=9606 GN=GCLC PE=1 SV=2	0	197.105	52	25	831	25	637	72.7	6.09	1745.9	25	GCLC	hsa:2729; P48506; Q14399	0	1.529	0.975926	89.47	94	106	23.72	75.32	1
P55196	Afadin OS=Homo sapiens OX=9606 GN=AFDN PE=1 SV=3	0	196.899	30	34	520	34	1824	206.7	6.47	749.53	34	AFDN	hsa:4301; O75087; O75088; O75089; P55196; Q59FP0; Q5TIG6; Q5TIG7; Q9NSN7; Q9NU92	0	1.607	0.971427	78.53	73.7	126.3	20.56	57.58	1
P62258	14-3-3 protein epsilon OS=Homo sapiens OX=9606 GN=YWHAE PE=1 SV=1	0	196.796	77	20	1837	19	255	29.2	4.74	3653.85	20	YWHAE	B3KY71; D3DTH5; hsa:7531; P29360; P42655; P62258; Q4VJB6; Q53XZ5; Q63631; Q7M4R4	0	1.109	0.992402	61.76	86.5	113.5	20.08	35.81	1	Acetyl [N-Term]
Q13838	Spliceosome RNA helicase DDX39B OS=Homo sapiens OX=9606 GN=DDX39B PE=1 SV=1	0	196.772	60	23	1097	13	428	49	5.67	2182.47	23	DDX39B	B0S8C0; hsa:7919; O43496; Q0EFA1; Q13838; Q2L6F9; Q53GL9; Q5RJ64; Q5RJ66; Q5ST94; Q5STB4; Q5STB5; Q5STB7; Q5STB8; Q5STU4; Q5STU5; Q5STU6; Q5STU8; Q71V76	10	2.162	0.862978	67.01	53.5	146.5	35.47	30.86	1	Met-loss+Acetyl [N-Term]
P60842	Eukaryotic initiation factor 4A-I OS=Homo sapiens OX=9606 GN=EIF4A1 PE=1 SV=1	0	196.597	67	24	1565	12	406	46.1	5.48	3283.71	24	EIF4A1	B2R6L8; D3DTP9; hsa:1973; J3QLC4; P04765; P60842; Q5U018; Q61516	13	1.601	0.972713	49.88	75.5	124.5	18.22	17.04	1
Q07021	Complement component 1 Q subcomponent-binding protein, mitochondrial OS=Homo sapiens OX=9606 GN=C1QBP PE=1 SV=1	0	196.347	63	12	1090	12	282	31.3	4.84	2305.52	12	C1QBP	hsa:708; Q07021; Q2HXR8; Q9NNY8	0	1.466	0.984689	61.03	88.9	111.1	12.96	36.76	1
O14950	Myosin regulatory light chain 12B OS=Homo sapiens OX=9606 GN=MYL12B PE=1 SV=2	0	195.861	83	13	1429	1	172	19.8	4.84	3341.78	13	MYL12B	D3DUH6; hsa:103910; O14950; Q13182; Q7Z5Z4	19	1.104	0.990707	64.7	98.5	101.5	35.66	44.6	1
Q04760	Lactoylglutathione lyase OS=Homo sapiens OX=9606 GN=GLO1 PE=1 SV=4	0	195.716	84	15	1066	15	184	20.8	5.31	2256.98	15	GLO1	B2R6P7; B4DDV0; hsa:2739; P78375; Q04760; Q59EL0; Q5TZW3; Q96FC0; Q96J41	0	2.364	0.765333	71.13	62.1	137.9	13.34	45.75	1	Met-loss+Acetyl [N-Term]
P31946	14-3-3 protein beta/alpha OS=Homo sapiens OX=9606 GN=YWHAB PE=1 SV=3	0	195.494	72	18	1010	11	246	28.1	4.83	2151.02	18	YWHAB	A8K9K2; E1P616; hsa:7529; P31946	1	1.251	0.998585	81.41	93.7	106.3	35.2	46.81	1	Met-loss+Acetyl [N-Term]
P21796	Voltage-dependent anion-selective channel protein 1 OS=Homo sapiens OX=9606 GN=VDAC1 PE=1 SV=2	0	195.404	65	21	2289	20	283	30.8	8.54	4437.38	21	VDAC1	B3KVK4; D3DQ93; hsa:7416; P21796; Q5FVE7; Q9UIQ5; Q9UPL0	1	2.026	0.897282	48.71	63.9	136.1	20.94	12.47	1	Met-loss+Acetyl [N-Term]
P01861	Immunoglobulin heavy constant gamma 4 OS=Homo sapiens OX=9606 GN=IGHG4 PE=1 SV=1	0	195.157	65	16	1452	10	327	35.9	7.36	3802.97	16			0	1.366	0.992504	80.04	86.4	113.6	36.81	97.4	1
P08727	Keratin, type I cytoskeletal 19 OS=Homo sapiens OX=9606 GN=KRT19 PE=1 SV=4	0	195.138	61	25	1477	19	400	44.1	5.14	3011.92	25	KRT19	B2R874; hsa:3880; P08727; Q5XG83; Q6NW33; Q7L5M9; Q96A53; Q96FV1; Q9BYF9; Q9P1Y4	3	1.305	0.995851	124.61	105.4	94.6	77.28	94.19	1
Q9BSJ8	Extended synaptotagmin-1 OS=Homo sapiens OX=9606 GN=ESYT1 PE=1 SV=1	0	194.712	33	24	1028	24	1104	122.8	5.83	2136.25	24	ESYT1	A0FGR7; A8K2S2; hsa:23344; O94848; Q6PJN4; Q9BSJ8; Q9H6J1; Q9H6W2; Q9Y416	0	1.141	0.992504	49.31	88.9	111.1	22.22	47.65	1
P04264	Keratin, type II cytoskeletal 1 OS=Homo sapiens OX=9606 GN=KRT1 PE=1 SV=6	0	194.645	48	25	1054	22	644	66	8.12	1770.97	25	KRT1	B2RA01; hsa:3848; P04264; P85925; P86104; Q14720; Q6GSJ0; Q9H298	2	1.285	0.996678	72.74	103.7	96.3	32.46	38.3	1
Q14683	Structural maintenance of chromosomes protein 1A OS=Homo sapiens OX=9606 GN=SMC1A PE=1 SV=2	0	194.208	33	33	599	33	1233	143.1	7.64	919.14	33	SMC1A	hsa:8243; O14995; Q14683; Q16351; Q2M228	0	1.875	0.936314	69.55	67.8	132.2	20.94	38.87	1
O94979	Protein transport protein Sec31A OS=Homo sapiens OX=9606 GN=SEC31A PE=1 SV=3	0	193.802	29	24	875	24	1220	132.9	6.89	1885.21	24	SEC31A	B4DIW6; B7ZKZ7; B7ZL00; H7C2W3; hsa:22872; O94979; Q17RR5; Q5H9P6; Q5XG74; Q659G7; Q6ZU90; Q7LCX9; Q86TJ0; Q8IZH4; Q9P048; Q9P0A6; Q9UM05; Q9UM06	0	1.059	0.984689	51.72	96	104	15.9	27.73	1
P52566	Rho GDP-dissociation inhibitor 2 OS=Homo sapiens OX=9606 GN=ARHGDIB PE=1 SV=3	0	192.704	69	9	807	9	201	23	5.21	1954.54	9	ARHGDIB	B5BU79; hsa:397; P52566	0	0.696	0.846055	74.8	127.4	72.6	32.75	55.77	1	Met-loss+Acetyl [N-Term]
Q96G03	Phosphopentomutase OS=Homo sapiens OX=9606 GN=PGM2 PE=1 SV=4	0	192.64	48	25	674	25	612	68.2	6.73	1218.19	25	PGM2	B4E0G8; hsa:55276; Q53FP5; Q5QTR0; Q96G03; Q9H0P9; Q9NV22	0	1.147	0.99383	76.04	96.2	103.8	13.49	108.79	1	Met-loss+Acetyl [N-Term]
Q15181	Inorganic pyrophosphatase OS=Homo sapiens OX=9606 GN=PPA1 PE=1 SV=2	0	192.631	67	16	1097	15	289	32.6	5.86	2674.74	16	PPA1	hsa:5464; Q15181; Q2M348; Q5SQT7; Q6P7P4; Q9UQJ5; Q9Y5B1	1	1.576	0.972752	62.38	84	116	23.55	16.23	1
P00167	Cytochrome b5 OS=Homo sapiens OX=9606 GN=CYB5A PE=1 SV=2	0	192.149	88	10	1367	10	134	15.3	4.96	3301.82	10	CYB5A	A8MV91; F8WEU4; hsa:1528; P00167; Q6IB14	0	0.465	0.340767	76.63	148.5	51.5	34.6	49.28	1	Met-loss+Acetyl [N-Term]
P22760	Arylacetamide deacetylase OS=Homo sapiens OX=9606 GN=AADAC PE=1 SV=5	0	191.749	66	18	741	18	399	45.7	8.69	1545.62	18	AADAC	A8K3L3; D3DNJ6; hsa:13; P22760; Q8N1A9	0	0.533	0.518634	105.85	154.2	45.8	32.1	106.2	1
Q9UHD8	Septin-9 OS=Homo sapiens OX=9606 GN=SEPTIN9 PE=1 SV=2	0	191.662	40	18	831	18	586	65.4	8.97	1583.92	18	SEPTIN9	A8K2V3; B3KPM0; B4DTL9; B4E0N2; B4E274; B7Z654; hsa:10801; Q96QF3; Q96QF4; Q96QF5; Q9HA04; Q9UG40; Q9UHD8; Q9Y5W4	0	1.562	0.975804	58.06	64.7	135.3	61.82	27.19	1
Q86TX2	Acyl-coenzyme A thioesterase 1 OS=Homo sapiens OX=9606 GN=ACOT1 PE=1 SV=1	0	190.998	67	22	1309	3	421	46.2	7.34	2746.77	22	ACOT1	A1L173; hsa:641371; Q3I5F9; Q86TX2	19	0.924	0.963015	101.83	107.2	92.8	27.17	88.51	1	Met-loss [N-Term]; Met-loss+Acetyl [N-Term]
P40926	Malate dehydrogenase, mitochondrial OS=Homo sapiens OX=9606 GN=MDH2 PE=1 SV=3	0	190.507	62	19	2933	19	338	35.5	8.68	7083.03	19	MDH2	A8K414; B2RE78; B4DE44; E9PDB2; hsa:4191; O43682; P40926	0	1.234	0.99928	48.27	85.9	114.1	14.74	29.76	1
P56199	Integrin alpha-1 OS=Homo sapiens OX=9606 GN=ITGA1 PE=1 SV=2	0	190.111	22	21	884	21	1179	130.8	6.29	1849.23	21	ITGA1	B2RNU0; hsa:3672; P56199	0	0.762	0.901459	71.76	126.3	73.7	20.03	71.24	1
P17844	Probable ATP-dependent RNA helicase DDX5 OS=Homo sapiens OX=9606 GN=DDX5 PE=1 SV=1	0	189.822	45	25	1614	15	614	69.1	8.92	2998.02	25	DDX5	B4DLW8; B5BU21; D3DU32; E7ETL9; hsa:1655; O75681; P17844; Q53Y61	0	2.112	0.879499	69.03	57.3	142.7	41.7	35.81	1
P54652	Heat shock-related 70 kDa protein 2 OS=Homo sapiens OX=9606 GN=HSPA2 PE=1 SV=1	0	189.674	36	23	1729	9	639	70	5.74	3793.62	23	HSPA2	hsa:3306; P54652; Q15508; Q53XM3; Q9UE78	1	0.476	0.366069	56.45	132.1	67.9	49.21	60.06	1
P13804	Electron transfer flavoprotein subunit alpha, mitochondrial OS=Homo sapiens OX=9606 GN=ETFA PE=1 SV=1	0	189.619	60	16	1308	16	333	35.1	8.38	3213.27	16	ETFA	B4DT43; hsa:2108; P13804; Q53XN3	0	0.712	0.864252	62.01	119.1	80.9	22.58	61.1	1
P40763	Signal transducer and activator of transcription 3 OS=Homo sapiens OX=9606 GN=STAT3 PE=1 SV=2	0	189.563	42	22	576	22	770	88	6.3	1381.99	22	STAT3	A8K7B8; hsa:6774; K7ENL3; O14916; P40763; Q9BW54	0	1.206	0.998449	55.09	87.1	112.9	13.77	43.42	1
Q13045	Protein flightless-1 homolog OS=Homo sapiens OX=9606 GN=FLII PE=1 SV=2	0	189.521	31	24	552	24	1269	144.7	6.05	770.77	24	FLII	B4DIL0; F5H407; hsa:2314; J3QLG3; Q13045	0	1.301	0.996481	61.55	96.1	103.9	35.77	37.03	1
P16615	Sarcoplasmic/endoplasmic reticulum calcium ATPase 2 OS=Homo sapiens OX=9606 GN=ATP2A2 PE=1 SV=1	0	189.52	25	23	1265	18	1042	114.7	5.34	3202.23	23	ATP2A2	A6NDN7; B4DF05; hsa:488; P16614; P16615; Q86VJ2	5	1.557	0.975926	50.14	74.1	125.9	16.36	25.84	1
Q13263	Transcription intermediary factor 1-beta OS=Homo sapiens OX=9606 GN=TRIM28 PE=1 SV=5	0	189.378	42	20	782	20	835	88.5	5.77	1510.48	20	TRIM28	hsa:10155; O00677; Q13263; Q7Z632; Q93040; Q96IM1	0	2.712	0.597909	79.16	44.2	155.8	69.44	49.49	1	Met-loss+Acetyl [N-Term]
P01011	Alpha-1-antichymotrypsin OS=Homo sapiens OX=9606 GN=SERPINA3 PE=1 SV=2	0	189.374	52	22	481	22	423	47.6	5.52	1083.34	22	SERPINA3	B3KVQ7; hsa:12; P01011; Q13703; Q2TU87; Q2TU88; Q59GP9; Q6LBY8; Q6LDT7; Q6NSC9; Q8N177; Q96DW8; Q9UC47; Q9UNU9	0	1.849	0.938716	84.43	60.9	139.1	33.59	133.19	1
Q16363	Laminin subunit alpha-4 OS=Homo sapiens OX=9606 GN=LAMA4 PE=1 SV=4	0	188.672	23	27	325	27	1823	202.4	6.28	573.1	27	LAMA4	hsa:3910; Q14731; Q14735; Q15335; Q16363; Q4LE44; Q5SZG8; Q9BTB8; Q9UE18; Q9UJN9	0	0.76	0.899366	104.91	135.9	64.1	45.63	59.54	1
P01860	Immunoglobulin heavy constant gamma 3 OS=Homo sapiens OX=9606 GN=IGHG3 PE=1 SV=2	0	188.527	56	17	2415	6	377	41.3	7.9	5815.45	17			0	1.167	0.99383	108.48	100.9	99.1	52.35	78.51	1
O94832	Unconventional myosin-Id OS=Homo sapiens OX=9606 GN=MYO1D PE=1 SV=2	0	188.343	35	28	483	27	1006	116.1	9.39	679.57	28	MYO1D	A6H8V3; hsa:4642; O94832; Q8NHP9	1	1.054	0.984689	84.43	147.9	52.1	32.86	79.3	1	Met-loss+Acetyl [N-Term]
Q93009	Ubiquitin carboxyl-terminal hydrolase 7 OS=Homo sapiens OX=9606 GN=USP7 PE=1 SV=2	0	188.006	43	33	666	33	1102	128.2	5.55	806.31	33	USP7	A6NMY8; B7Z815; H0Y3G8; hsa:7874; Q93009	0	1.649	0.964926	77.63	86.3	113.7	53.22	50.81	1
O94973	AP-2 complex subunit alpha-2 OS=Homo sapiens OX=9606 GN=AP2A2 PE=1 SV=2	0	187.91	32	20	975	13	939	103.9	6.96	1960.69	20	AP2A2	hsa:161; O75403; O94973; Q53ET1; Q96SI8	0	1.022	0.980663	58.76	115.2	84.8	20.85	41.8	1
P10635	Cytochrome P450 2D6 OS=Homo sapiens OX=9606 GN=CYP2D6 PE=1 SV=2	0	187.359	55	18	565	18	497	55.7	7.25	1427.94	18	CYP2D6	hsa:1565; P10635; Q16752; Q2XND6; Q2XND7; Q2XNE0; Q6B012; Q6NXU8	0	0.505	0.444931	93.83	163.2	36.8	47.07	110.4	1
Q14554	Protein disulfide-isomerase A5 OS=Homo sapiens OX=9606 GN=PDIA5 PE=1 SV=1	0	187.064	53	22	492	22	519	59.6	7.91	852.7	22	PDIA5	D3DN95; hsa:10954; Q14554; Q9BV43	0	0.806	0.925961	94.33	125.5	74.5	37.23	70.22	1
P52907	F-actin-capping protein subunit alpha-1 OS=Homo sapiens OX=9606 GN=CAPZA1 PE=1 SV=3	0	186.744	55	12	895	9	286	32.9	5.69	1968.52	12	CAPZA1	hsa:829; P52907; Q53FQ6; Q6FHD5	4	1.055	0.984689	62.45	97.3	102.7	21.7	17.25	1	Met-loss+Acetyl [N-Term]
Q9UN36	Protein NDRG2 OS=Homo sapiens OX=9606 GN=NDRG2 PE=1 SV=2	0	186.711	52	11	964	11	371	40.8	5.21	2710.7	11	NDRG2	B3KUE3; B4DE86; B7WP11; B7WPD5; D3DS07; D3DS10; hsa:57447; Q567T1; Q68DW2; Q86U08; Q86U46; Q96FD3; Q96FT0; Q96JU0; Q96PN0; Q9BQH5; Q9ULH2; Q9UN36	0	0.58	0.624459	97.54	156.3	43.7	30.16	82.72	1	Met-loss+Acetyl [N-Term]
Q14160	Protein scribble homolog OS=Homo sapiens OX=9606 GN=SCRIB PE=1 SV=5	0	186.534	31	31	526	29	1630	174.8	5.07	719.08	31	SCRIB	hsa:23513; Q14160; Q6P496; Q7Z5D1; Q8WWV8; Q96C69; Q96GG1	2	1.606	0.9715	75.82	59.3	140.7	40.53	43.59	1
P23381	Tryptophan--tRNA ligase, cytoplasmic OS=Homo sapiens OX=9606 GN=WARS1 PE=1 SV=2	0	186.458	56	18	833	18	471	53.1	6.23	1885.92	18	WARS1	A6NGN1; A6NID3; hsa:7453; P23381; P78535; Q502Y0; Q53XB6; Q9UDI5; Q9UDL3	0	0.839	0.940848	67.07	119.1	80.9	27.91	69.86	1	Met-loss [N-Term]
Q9Y3Z3	Deoxynucleoside triphosphate triphosphohydrolase SAMHD1 OS=Homo sapiens OX=9606 GN=SAMHD1 PE=1 SV=2	0	186.229	50	24	1107	24	626	72.2	7.14	2116.62	24	SAMHD1	B4E2A5; E1P5V2; hsa:25939; Q5JXG8; Q8N491; Q9H004; Q9H005; Q9H3U9; Q9Y3Z3	0	0.756	0.896853	60.88	119.8	80.2	23	51.8	1
Q9H6R3	Acyl-CoA synthetase short-chain family member 3, mitochondrial OS=Homo sapiens OX=9606 GN=ACSS3 PE=1 SV=1	0	185.979	43	20	946	20	686	74.7	8.63	2258.65	20	ACSS3	hsa:79611; Q8NC66; Q9H6R3	0	0.961	0.972713	101.29	127	73	25.49	94.12	1
O15020	Spectrin beta chain, non-erythrocytic 2 OS=Homo sapiens OX=9606 GN=SPTBN2 PE=1 SV=3	0	185.496	19	39	516	32	2390	271.2	6.11	888.91	39	SPTBN2	hsa:6712; O14872; O14873; O15020	0	0.599	0.670265	86.98	124.5	75.5	52.88	84.8	1
P49915	GMP synthase [glutamine-hydrolyzing] OS=Homo sapiens OX=9606 GN=GMPS PE=1 SV=1	0	185.042	46	25	359	25	693	76.7	6.87	534.05	25	GMPS	A8K639; B4DXV7; F8W720; hsa:8833; P49915	0	2.191	0.852018	78.18	35.1	164.9	80.26	19.89	1
Q13310	Polyadenylate-binding protein 4 OS=Homo sapiens OX=9606 GN=PABPC4 PE=1 SV=1	0	184.935	37	20	1273	14	644	70.7	9.26	2593.3	20	PABPC4	B1ANQ8; hsa:8761; Q13310; Q4VC03; Q6P0N3	0	2.046	0.896698	36.03	59.9	140.1	20.59	17.4	1
O95994	Anterior gradient protein 2 homolog OS=Homo sapiens OX=9606 GN=AGR2 PE=1 SV=1	0	184.898	65	12	258	11	175	20	9	688.64	12	AGR2	hsa:10551; O95994	1	2.531	0.643139	118.45	49	151	73.36	190.51	1
P30043	Flavin reductase (NADPH) OS=Homo sapiens OX=9606 GN=BLVRB PE=1 SV=3	0	184.854	65	13	1504	13	206	22.1	7.65	4932.43	13	BLVRB	A6NKD8; B2R5C6; hsa:645; P30043; P32078; P53005; Q32LZ2	0	0.625	0.725194	61.92	119.4	80.6	13.67	27.42	1
P39060	Collagen alpha-1(XVIII) chain OS=Homo sapiens OX=9606 GN=COL18A1 PE=1 SV=5	0	184.836	15	16	798	16	1754	178.1	6.01	1906.17	16	COL18A1	A8MVI4; hsa:80781; P39060; Q58EX6; Q6RZ39; Q6RZ40; Q6RZ41; Q8N4S4; Q8WXI5; Q96T70; Q9UK38; Q9Y6Q7; Q9Y6Q8	0	2.37	0.762071	85.77	54	146	47.12	68.78	1
P10909	Clusterin OS=Homo sapiens OX=9606 GN=CLU PE=1 SV=1	0	184.744	37	18	1044	18	449	52.5	6.27	2372.41	18	CLU	B2R9Q1; B3KSE6; hsa:1191; P10909; P11380; P11381; Q2TU75; Q5HYC1; Q7Z5B9	0	1.875	0.936314	92.85	64.7	135.3	45.23	90.8	1
P45974	Ubiquitin carboxyl-terminal hydrolase 5 OS=Homo sapiens OX=9606 GN=USP5 PE=1 SV=2	0	184.569	39	21	959	18	858	95.7	5.03	2244.95	21	USP5	D3DUS7; D3DUS8; hsa:8078; P45974; Q96J22	3	1.569	0.97451	50.41	84.5	115.5	20.42	26.14	1
P24298	Alanine aminotransferase 1 OS=Homo sapiens OX=9606 GN=GPT PE=1 SV=3	0	184.226	54	17	531	16	496	54.6	7.18	1253.93	17	GPT	B0YJ18; D3DWM7; hsa:2875; P24298; P78398; Q93076	1	0.223	0.00544189	80.87	189.2	10.8	44.05	100.04	1
Q14203	Dynactin subunit 1 OS=Homo sapiens OX=9606 GN=DCTN1 PE=1 SV=3	0	183.739	33	27	804	27	1278	141.6	5.81	1326.12	27	DCTN1	A8MY36; B4DM45; E9PFS5; E9PGE1; G5E9H4; hsa:1639; O95296; Q14203; Q6IQ37; Q9BRM9; Q9UIU1; Q9UIU2	0	1.117	0.992504	46.54	95.5	104.5	16.99	23.62	1
P30039	Phenazine biosynthesis-like domain-containing protein OS=Homo sapiens OX=9606 GN=PBLD PE=1 SV=2	0	183.342	76	19	874	19	288	31.8	6.52	2419.59	19	PBLD	A8MZJ3; C9JIM0; hsa:64081; P30039; Q9HCC2	0	0.23	0.0068976	103.08	174	26	51.87	93.12	1
P01876	Immunoglobulin heavy constant alpha 1 OS=Homo sapiens OX=9606 GN=IGHA1 PE=1 SV=2	0	182.859	80	15	1632	12	353	37.6	6.51	4104.93	15			5	1.443	0.984689	103.88	77.5	122.5	42.28	73.55	1
Q02790	Peptidyl-prolyl cis-trans isomerase FKBP4 OS=Homo sapiens OX=9606 GN=FKBP4 PE=1 SV=3	0	182.447	74	26	676	26	459	51.8	5.43	1248.57	26	FKBP4	D3DUQ1; hsa:2288; Q02790; Q9UCP1; Q9UCV7	0	1.742	0.953176	87.67	85	115	68.45	53.06	1	Met-loss [N-Term]
Q9UMS4	Pre-mRNA-processing factor 19 OS=Homo sapiens OX=9606 GN=PRPF19 PE=1 SV=1	0	182.369	52	15	1074	15	504	55.1	6.61	2245.71	15	PRPF19	hsa:27339; Q9UMS4	0	2.248	0.822384	67.49	52.7	147.3	32.84	34.59	1	Met-loss+Acetyl [N-Term]
P16152	Carbonyl reductase [NADPH] 1 OS=Homo sapiens OX=9606 GN=CBR1 PE=1 SV=3	0	182.257	64	16	2436	13	277	30.4	8.32	6811	16	CBR1	B2RBZ7; B4DFK7; hsa:873; P16152; Q3LHW8	3	0.759	0.897282	80.27	135.2	64.8	19.57	69.94	1	Met-loss+Acetyl [N-Term]
P24844	Myosin regulatory light polypeptide 9 OS=Homo sapiens OX=9606 GN=MYL9 PE=1 SV=4	0	182.195	83	13	1024	6	172	19.8	4.92	2568.96	13	MYL9	E1P5T6; hsa:10398; P24844; Q9BQL9; Q9BUF9; Q9H136	0	0.389	0.163303	85.42	142.5	57.5	53.98	62.61	1
Q5R3I4	Tetratricopeptide repeat protein 38 OS=Homo sapiens OX=9606 GN=TTC38 PE=1 SV=1	0	182.108	58	17	866	17	469	52.8	5.99	1703.04	17	TTC38	hsa:55020; Q5R3I4; Q8WV27; Q9NWP8	0	0.852	0.940848	79.23	80.3	119.7	15.99	32.72	1
Q13283	Ras GTPase-activating protein-binding protein 1 OS=Homo sapiens OX=9606 GN=G3BP1 PE=1 SV=1	0	181.984	52	16	634	15	466	52.1	5.52	784.14	16	G3BP1	hsa:10146; Q13283; Q5HYE9	1	2.22	0.837154	79.84	80.4	119.6	9.1	37.06	1	Met-loss [N-Term]
P04083	Annexin A1 OS=Homo sapiens OX=9606 GN=ANXA1 PE=1 SV=2	0	181.795	58	19	996	19	346	38.7	7.02	2968.37	19	ANXA1	B5BU38; hsa:301; P04083	0	0.753	0.896698	93.46	124.7	75.3	25.66	91.36	1	Met-loss+Acetyl [N-Term]
P33176	Kinesin-1 heavy chain OS=Homo sapiens OX=9606 GN=KIF5B PE=1 SV=1	0	181.588	36	27	688	27	963	109.6	6.51	1465.79	27	KIF5B	A0AVB2; hsa:3799; P33176; Q5VZ85	0	1.882	0.932932	65.6	55.6	144.4	51.42	30.41	1	Met-loss+Acetyl [N-Term]
O14745	Na(+)/H(+) exchange regulatory cofactor NHE-RF1 OS=Homo sapiens OX=9606 GN=SLC9A3R1 PE=1 SV=4	0	181.083	56	13	938	13	358	38.8	5.77	2309.4	13	NHERF1	B3KY21; hsa:9368; O14745; O43552; Q86WQ5	0	2.054	0.896215	46.83	67	133	22.96	27.02	1
P37802	Transgelin-2 OS=Homo sapiens OX=9606 GN=TAGLN2 PE=1 SV=3	0	180.964	90	17	1567	16	199	22.4	8.25	3941.6	17	TAGLN2	E9KL39; hsa:8407; P37802; Q5JRQ6; Q5JRQ7; Q6FGI1; Q9BUH5; Q9H4P0	2	1.627	0.966969	78.53	73.1	126.9	57.74	47.84	1	Met-loss+Acetyl [N-Term]
Q9UQE7	Structural maintenance of chromosomes protein 3 OS=Homo sapiens OX=9606 GN=SMC3 PE=1 SV=2	0	180.155	29	30	690	30	1217	141.5	7.18	936.01	30	SMC3	A8K156; hsa:9126; O60464; Q5T482; Q9UQE7	0	1.783	0.945498	60.47	57.4	142.6	23.38	32.67	1
Q15493	Regucalcin OS=Homo sapiens OX=9606 GN=RGN PE=1 SV=1	0	179.975	75	18	1023	18	299	33.2	6.25	2331.78	18	RGN	A4FTW1; A8K271; hsa:9104; Q15493; Q53FC9; Q5JRR5	0	0.533	0.517364	106.8	146.5	53.5	32.92	105.82	1
Q06323	Proteasome activator complex subunit 1 OS=Homo sapiens OX=9606 GN=PSME1 PE=1 SV=1	0	179.878	63	16	1599	16	249	28.7	6.02	4526.98	16	PSME1	A6NJG9; H0YNE3; hsa:5720; Q06323; Q6IBM2; Q9UEF4	0	0.847	0.940848	80.57	107.9	92.1	16.57	61.5	1
Q9UNM6	26S proteasome non-ATPase regulatory subunit 13 OS=Homo sapiens OX=9606 GN=PSMD13 PE=1 SV=2	0	179.818	70	23	514	23	376	42.9	5.81	964.41	23	PSMD13	B3KT15; hsa:5719; O75831; Q53XU2; Q9UNM6; Q9UNV3	0	1.459	0.984689	46.72	77.6	122.4	12.62	22.91	1
P50225	Sulfotransferase 1A1 OS=Homo sapiens OX=9606 GN=SULT1A1 PE=1 SV=3	0	179.698	65	15	975	5	295	34.1	6.62	2565.39	15	SULT1A1	hsa:6817; P50225; Q2NL71; Q86U58; Q92818; Q9BVU6; Q9UGG7	12	0.367	0.124221	89.82	162.1	37.9	33.06	58.65	1	Acetyl [N-Term]
Q9HDC9	Adipocyte plasma membrane-associated protein OS=Homo sapiens OX=9606 GN=APMAP PE=1 SV=2	0	179.434	49	16	1412	16	416	46.5	6.16	3399.72	16	APMAP	A8K514; B4DXG1; hsa:57136; Q6UVZ8; Q9GZS8; Q9HDC9; Q9NUB2	0	0.829	0.938291	73.98	115.8	84.2	24.49	50.98	1
Q9H4A4	Aminopeptidase B OS=Homo sapiens OX=9606 GN=RNPEP PE=1 SV=2	0	179.406	52	25	1126	25	650	72.5	5.74	2378.6	25	RNPEP	hsa:6051; Q9BVM9; Q9H1D4; Q9H4A4; Q9NPT7	0	1.159	0.99383	54.58	94.7	105.3	7.35	40.12	1
Q01995	Transgelin OS=Homo sapiens OX=9606 GN=TAGLN PE=1 SV=4	0	179.273	71	18	1157	18	201	22.6	8.84	2595.39	18	TAGLN	hsa:6876; O15542; Q01995	0	0.561	0.582959	100.22	111.7	88.3	30.99	19.76	1	Met-loss+Acetyl [N-Term]
P05388	60S acidic ribosomal protein P0 OS=Homo sapiens OX=9606 GN=RPLP0 PE=1 SV=1	0	178.627	53	17	934	17	317	34.3	5.97	1935.41	17	RPLP0	hsa:6175; P05388; Q3B7A4; Q9BVK4	0	1.675	0.961492	52.35	74.4	125.6	9.2	30.08	1
Q9ULC5	Long-chain-fatty-acid--CoA ligase 5 OS=Homo sapiens OX=9606 GN=ACSL5 PE=1 SV=1	0	178.588	44	21	1091	20	683	75.9	6.92	2309.51	21	ACSL5	A6GV77; D3DRB3; hsa:51703; Q6UX44; Q9UIU4; Q9ULC5	0	0.974	0.972752	113.87	126.6	73.4	26.31	135.14	1
P26641	Elongation factor 1-gamma OS=Homo sapiens OX=9606 GN=EEF1G PE=1 SV=3	0	178.52	53	18	1403	18	437	50.1	6.67	3709.19	18	EEF1G	B4DTG2; hsa:1937; P26641; Q6PJ62; Q6PK31; Q96CU2; Q9P196	0	2.27	0.811386	56.71	60.8	139.2	25.1	31.9	1
P84077	ADP-ribosylation factor 1 OS=Homo sapiens OX=9606 GN=ARF1 PE=1 SV=2	0	178.377	87	16	999	10	181	20.7	6.8	2005.97	16	ARF1	hsa:375; P10947; P32889; P84077	11	1.353	0.992504	68.81	94.4	105.6	24.72	25.39	1	Met-loss+Acetyl [N-Term]
P21810	Biglycan OS=Homo sapiens OX=9606 GN=BGN PE=1 SV=2	0	178.329	42	13	722	13	368	41.6	7.52	1758.86	13	BGN	D3DWU3; hsa:633; P13247; P21810	0	0.797	0.919583	88.18	134.2	65.8	31.05	58.76	1
Q9P2M7	Cingulin OS=Homo sapiens OX=9606 GN=CGN PE=1 SV=3	0	178.138	36	32	594	31	1203	137	5.52	951.08	32	CGN	A6H8L3; A7MD22; hsa:57530; Q5T386; Q9NR25; Q9P2M7	1	1.141	0.992504	64.73	84.7	115.3	22.36	53.48	1
P24462	Cytochrome P450 3A7 OS=Homo sapiens OX=9606 GN=CYP3A7 PE=1 SV=3	0	177.704	50	23	573	15	503	57.4	9.09	983.73	23	CYP3A7	A4D288; hsa:100861540; hsa:1551; P24462; Q9H241	0	2.666	0.587477	122.4	118.7	81.3	50.36	194.62	1
O60763	General vesicular transport factor p115 OS=Homo sapiens OX=9606 GN=USO1 PE=1 SV=2	0	177.691	29	22	780	22	962	107.8	4.91	1454.28	22	USO1	B2RAQ0; hsa:8615; O60763; Q6PK63; Q86TB8; Q8N592	0	0.936	0.966611	51.31	104.4	95.6	12.26	36.85	1
P61158	Actin-related protein 3 OS=Homo sapiens OX=9606 GN=ACTR3 PE=1 SV=3	0	177.057	66	20	1543	19	418	47.3	5.88	3806.32	20	ACTR3	hsa:10096; P32391; P61158; Q53QM2	0	1.035	0.980663	48.07	99.9	100.1	18.43	16.24	1
P20290	Transcription factor BTF3 OS=Homo sapiens OX=9606 GN=BTF3 PE=1 SV=1	0	177.019	43	8	428	8	206	22.2	9.38	861.2	8	BTF3	A8K510; hsa:689; P20290; Q13893; Q76M56	0	2.047	0.896698	71.2	54.8	145.2	29.4	54.06	1
P49753	Acyl-coenzyme A thioesterase 2, mitochondrial OS=Homo sapiens OX=9606 GN=ACOT2 PE=1 SV=6	0	176.819	54	20	1016	1	483	53.2	8.47	2145	20	ACOT2	hsa:10965; P49753; Q3I5F8; Q53EK4; Q9NUX4	0	1.917	0.938291	110.08	65.6	134.4	63.17	79.34	1
P19105	Myosin regulatory light chain 12A OS=Homo sapiens OX=9606 GN=MYL12A PE=1 SV=2	0	176.47	84	13	1433	1	171	19.8	4.81	3329.88	13	MYL12A	hsa:10627; P19105; Q53X45	0	100	2.00326e-16			200		101.08	1
O00748	Cocaine esterase OS=Homo sapiens OX=9606 GN=CES2 PE=1 SV=1	0	176.25	36	16	1535	16	559	61.8	6.1	2950.95	16	CES2	A0A024R6X1; A8K367; hsa:8824; O00748; Q16859; Q5MAB8; Q7Z366; Q8IUP4; Q8TCP8	0	0.52	0.491217	78.66	134.8	65.2	27.04	56.23	1
Q13435	Splicing factor 3B subunit 2 OS=Homo sapiens OX=9606 GN=SF3B2 PE=1 SV=2	0	176.203	39	27	695	27	895	100.2	5.67	1303.58	27	SF3B2	A8K485; B4DT19; hsa:10992; Q13435; Q7L4T5; Q7Z627; Q969K1; Q96CM6; Q9BWD2	0	2.145	0.870174	69.16	50.6	149.4	46.57	34.66	1	Met-loss+Acetyl [N-Term]
P04843	Dolichyl-diphosphooligosaccharide--protein glycosyltransferase subunit 1 OS=Homo sapiens OX=9606 GN=RPN1 PE=1 SV=1	0	176.161	38	17	1337	17	607	68.5	6.38	3849.31	17	RPN1	B2R5Z0; D3DNB6; hsa:6184; P04843; Q68DT1	0	1.179	0.995851	61.93	88.3	111.7	14.41	28.61	1
Q9NR45	Sialic acid synthase OS=Homo sapiens OX=9606 GN=NANS PE=1 SV=2	0	175.961	41	11	708	11	359	40.3	6.74	1590.74	11	NANS	B2RE98; hsa:54187; Q8WUV9; Q9BWS6; Q9NR45; Q9NVD4	0	1.87	0.936521	70.75	61.1	138.9	40.76	38.3	1	Met-loss [N-Term]
Q05639	Elongation factor 1-alpha 2 OS=Homo sapiens OX=9606 GN=EEF1A2 PE=1 SV=1	0	175.91	57	13	3558	6	463	50.4	9.03	9947.92	13	EEF1A2	B5BUF3; E1P5J1; hsa:1917; P54266; Q05639; Q0VGC7	0	2.54	0.643572	101.72	127.7	72.3	58.81	145.54	1
P05455	Lupus La protein OS=Homo sapiens OX=9606 GN=SSB PE=1 SV=2	0	175.289	47	19	715	19	408	46.8	7.12	1693.46	19	SSB	hsa:6741; P05455; Q15367; Q53XJ4	0	2.001	0.906259	61.28	54.3	145.7	38.57	31.51	1
O94874	E3 UFM1-protein ligase 1 OS=Homo sapiens OX=9606 GN=UFL1 PE=1 SV=2	0	174.819	42	27	631	27	794	89.5	6.79	933.32	27	UFL1	A0PJ53; B4DJ57; C0H5X5; hsa:23376; O94874; Q8N765; Q9NTQ0	0	1.341	0.99383	49.72	79.1	120.9	21.28	31	1	Met-loss+Acetyl [N-Term]
P05166	Propionyl-CoA carboxylase beta chain, mitochondrial OS=Homo sapiens OX=9606 GN=PCCB PE=1 SV=3	0	174.446	46	15	660	15	539	58.2	7.64	1621.37	15	PCCB	B7Z2Z4; hsa:5096; P05166; Q16813; Q96CX0	0	0.514	0.472696	104.99	118.1	81.9	22.79	70.62	1
P07737	Profilin-1 OS=Homo sapiens OX=9606 GN=PFN1 PE=1 SV=2	0	174.359	92	12	3631	12	140	15	8.27	8299.49	12	PFN1	hsa:5216; P07737; Q53Y44	0	1.151	0.99383	62.79	90.5	109.5	21.16	48.68	1	Met-loss+Acetyl [N-Term]
P47897	Glutamine--tRNA ligase OS=Homo sapiens OX=9606 GN=QARS1 PE=1 SV=1	0	174.127	40	29	750	29	775	87.7	7.15	1247.99	29	QARS1	B4DWJ2; hsa:5859; P47897	0	1.354	0.992504	63.26	91.2	108.8	19.07	34.64	1
P09467	Fructose-1,6-bisphosphatase 1 OS=Homo sapiens OX=9606 GN=FBP1 PE=1 SV=5	0	174.12	64	20	1231	19	338	36.8	6.99	2535.22	20	FBP1	hsa:2203; O75571; P09467; Q53F94; Q96E46	1	0.361	0.114596	87.43	161.2	38.8	34.18	69.76	1
Q9BS26	Endoplasmic reticulum resident protein 44 OS=Homo sapiens OX=9606 GN=ERP44 PE=1 SV=1	0	173.985	44	11	911	10	406	46.9	5.26	2121.76	11	ERP44	hsa:23071; O60319; Q4VXC1; Q5VWZ7; Q6UW14; Q8WX67; Q9BS26	0	1.064	0.984689	51.18	100.8	99.2	17.76	25.03	1
P49411	Elongation factor Tu, mitochondrial OS=Homo sapiens OX=9606 GN=TUFM PE=1 SV=2	0	173.754	60	19	1152	19	452	49.5	7.61	3320.93	19			0	1.075	0.988179	50.16	97.2	102.8	12.02	36.63	1
Q86YB7	Enoyl-CoA hydratase domain-containing protein 2, mitochondrial OS=Homo sapiens OX=9606 GN=ECHDC2 PE=1 SV=2	0	173.731	52	11	452	11	292	31.1	8.72	1172.3	11	ECHDC2	D3DQ36; hsa:55268; Q86YB7; Q9NV38	0	0.174	0.000736274	98.24	187.8	12.2	40.52	90.9	1
P30740	Leukocyte elastase inhibitor OS=Homo sapiens OX=9606 GN=SERPINB1 PE=1 SV=1	0	173.311	67	19	505	18	379	42.7	6.28	972.21	19	SERPINB1	A8K5L2; B4DNT0; hsa:1992; P30740; Q53FB9; Q5W0E1; Q9UDF8	1	2.269	0.812594	84.52	69.7	130.3	36.66	82.2	1	Acetyl [N-Term]
P32929	Cystathionine gamma-lyase OS=Homo sapiens OX=9606 GN=CTH PE=1 SV=3	0	173.255	67	19	808	19	405	44.5	6.7	1641.81	19	CTH	B4E1R2; E9PDV0; hsa:1491; P32929; Q53FB3; Q53Y79; Q9H4W7; Q9H4W8	0	0.199	0.00225914	109.04	157.8	42.2	52.64	63.66	1
Q9NQ94	APOBEC1 complementation factor OS=Homo sapiens OX=9606 GN=A1CF PE=1 SV=1	0	172.837	50	21	1152	20	594	65.2	8.47	2293.38	21	A1CF	A1L4F2; A8K7G7; B7ZM14; hsa:29974; Q5SZQ0; Q9NQ93; Q9NQ94; Q9NQX8; Q9NQX9; Q9NXC9; Q9NZD3	1	1.761	0.9473	68.87	59.9	140.1	51.66	61.7	1
P48449	Lanosterol synthase OS=Homo sapiens OX=9606 GN=LSS PE=1 SV=1	0	172.802	44	24	794	24	732	83.3	6.61	1624.78	24	LSS	B4DJZ9; D3DSN0; E9PEI9; G5E9Q9; hsa:4047; P48449; Q8IYL6; Q9UEZ1	0	0.817	0.932285	88.02	131.4	68.6	43.76	92.23	1
P67809	Y-box-binding protein 1 OS=Homo sapiens OX=9606 GN=YBX1 PE=1 SV=3	0	172.658	60	12	638	7	324	35.9	9.88	1574.92	12	YBX1	hsa:4904; P16990; P16991; P67809; Q14972; Q15325; Q5FVF0	6	2.355	0.768745	62.13	54	146	21.17	50.39	1	Met-loss+Acetyl [N-Term]
P51648	Aldehyde dehydrogenase family 3 member A2 OS=Homo sapiens OX=9606 GN=ALDH3A2 PE=1 SV=1	0	172.613	50	18	1265	17	485	54.8	7.88	2993.15	18	ALDH3A2	hsa:224; P51648; Q6I9T3; Q93011; Q96J37	1	1.176	0.994424	108.06	99.1	100.9	24.71	73.77	1
O43390	Heterogeneous nuclear ribonucleoprotein R OS=Homo sapiens OX=9606 GN=HNRNPR PE=1 SV=1	0	172.406	45	23	1512	17	633	70.9	8.13	2382.67	23	HNRNPR	hsa:10236; O43390; Q2L7G6; Q5TEH1; Q9BV64; S4R3J4	0	1.916	0.924506	71.94	58	142	25.32	29.12	1	Met-loss+Acetyl [N-Term]
O94826	Mitochondrial import receptor subunit TOM70 OS=Homo sapiens OX=9606 GN=TOMM70 PE=1 SV=1	0	171.925	51	23	531	23	608	67.4	7.12	936.51	23	TOMM70	D3DN48; hsa:9868; O94826	0	1.759	0.947874	57.77	61.7	138.3	17.32	35.06	1
Q96I99	Succinate--CoA ligase [GDP-forming] subunit beta, mitochondrial OS=Homo sapiens OX=9606 GN=SUCLG2 PE=1 SV=2	0	171.91	52	18	1333	18	432	46.5	6.39	3222.94	18	SUCLG2	C9JVT2; hsa:8801; O95195; Q6NUH7; Q86VX8; Q8WUQ1; Q96I99	0	0.495	0.41746	74.39	143.9	56.1	26.43	79.65	1
P62701	40S ribosomal protein S4, X isoform OS=Homo sapiens OX=9606 GN=RPS4X PE=1 SV=2	0	171.82	65	18	969	12	263	29.6	10.15	2169.71	18	RPS4X	hsa:6191; P12631; P12750; P27576; P55831; P62701; Q14727; Q6IPY4	6	2.059	0.896215	83.88	80.3	119.7	39.02	38.85	1
P67936	Tropomyosin alpha-4 chain OS=Homo sapiens OX=9606 GN=TPM4 PE=1 SV=3	0	171.726	75	22	1742	12	248	28.5	4.69	3866.48	22	TPM4	hsa:7171; P07226; P67936; Q15659; Q5U0D9; Q9BU85; Q9H8Q3; Q9UCS1; Q9UCS2; Q9UCS3; Q9UCS4	6	0.651	0.766811	91.68	134.6	65.4	37.9	73.29	1	Met-loss+Acetyl [N-Term]
Q13724	Mannosyl-oligosaccharide glucosidase OS=Homo sapiens OX=9606 GN=MOGS PE=1 SV=5	0	171.553	40	20	618	20	837	91.9	8.9	1253.61	20	MOGS	A8K938; F5H6D0; hsa:7841; Q13724; Q17RN9; Q8TCT5	0	0.976	0.972752	68.83	97.5	102.5	17.19	37	1
Q96I24	Far upstream element-binding protein 3 OS=Homo sapiens OX=9606 GN=FUBP3 PE=1 SV=2	0	171.43	54	21	801	19	572	61.6	8.38	1374.71	21	FUBP3	A3KFK8; A3KFL0; hsa:8939; Q92946; Q96I24; Q9BVB6	0	2.044	0.896698	78.42	71.7	128.3	17.48	42.77	1
P11047	Laminin subunit gamma-1 OS=Homo sapiens OX=9606 GN=LAMC1 PE=1 SV=3	0	171.168	27	25	461	25	1609	177.5	5.12	964.24	25	LAMC1	hsa:3915; P11047; Q5VYE7	0	1.049	0.984689	91.99	93.8	106.2	23.54	42.18	1
P14923	Junction plakoglobin OS=Homo sapiens OX=9606 GN=JUP PE=1 SV=3	0	171.091	40	21	872	17	745	81.7	6.14	1534.76	21	JUP	hsa:3728; P14923; Q15093; Q15151; Q7L3S5; Q86W21; Q9BWC4; Q9HCX9	4	1.263	0.998585	76.1	93.7	106.3	22.33	45.45	1
Q9BY49	Peroxisomal trans-2-enoyl-CoA reductase OS=Homo sapiens OX=9606 GN=PECR PE=1 SV=2	0	171.036	60	15	1304	15	303	32.5	8.81	3159.34	15	PECR	B2RE42; hsa:55825; Q53TC4; Q6IAK9; Q9BY49; Q9NRD4; Q9NY60; Q9P1A4	0	0.791	0.916471	89.17	116.2	83.8	28.03	60.59	1
Q04637	Eukaryotic translation initiation factor 4 gamma 1 OS=Homo sapiens OX=9606 GN=EIF4G1 PE=1 SV=4	0	171.006	26	25	676	21	1599	175.4	5.33	1173.57	25	EIF4G1	D3DNT2; D3DNT4; D3DNT5; E9PFM1; G5E9S1; hsa:1981; O43177; O95066; Q04637; Q5HYG0; Q6ZN21; Q8N102	3	1.493	0.980663	60.54	87.6	112.4	12.52	32.02	1
P83111	Serine beta-lactamase-like protein LACTB, mitochondrial OS=Homo sapiens OX=9606 GN=LACTB PE=1 SV=2	0	170.875	45	19	704	19	547	60.7	8.53	1453.4	19	LACTB	hsa:114294; P83096; P83111	0	0.856	0.941147	66.68	113.5	86.5	20.13	50.62	1
P09488	Glutathione S-transferase Mu 1 OS=Homo sapiens OX=9606 GN=GSTM1 PE=1 SV=3	0	170.845	65	14	280	6	218	25.7	6.7	706.35	14	GSTM1	hsa:2944; P09488; Q5GHG0; Q6FH88; Q8TC98; Q9UC96	9	0.579	0.254428	109.81	115.7	84.3	180.45	150.35	1	Met-loss [N-Term]
Q9NVS9	Pyridoxine-5'-phosphate oxidase OS=Homo sapiens OX=9606 GN=PNPO PE=1 SV=1	0	170.728	72	16	865	16	261	30	7.06	1752.84	16	PNPO	B4E0V0; B4E152; B4E1D7; D3DTT9; hsa:55163; Q9NVS9	0	0.727	0.879499	95.58	147.1	52.9	25.87	82.93	1
Q96GK7	Fumarylacetoacetate hydrolase domain-containing protein 2A OS=Homo sapiens OX=9606 GN=FAHD2A PE=1 SV=1	0	170.696	48	11	605	11	314	34.6	8.24	1540.18	11	FAHD2A	hsa:51011; Q96GK7; Q9Y3B0	0	0.306	0.046589	93.36	167.8	32.2	34	60.97	1
P04003	C4b-binding protein alpha chain OS=Homo sapiens OX=9606 GN=C4BPA PE=1 SV=2	0	170.582	40	17	385	17	597	67	7.3	682.39	17	C4BPA	hsa:722; P04003; Q5VVQ8	0	1.582	0.972752	67.82	69	131	29.46	43.35	1
P49591	Serine--tRNA ligase, cytoplasmic OS=Homo sapiens OX=9606 GN=SARS1 PE=1 SV=3	0	170.487	44	16	646	16	514	58.7	6.43	1584.54	16	SARS1	B2R6Y9; hsa:6301; P49591; Q5T5C8; Q9NSE3	0	1.314	0.99383	57.69	76.8	123.2	14.47	38.96	1	Met-loss [N-Term]
P62979	Ubiquitin-40S ribosomal protein S27a OS=Homo sapiens OX=9606 GN=RPS27A PE=1 SV=2	0	170.39	59	13	1129	13	156	18	9.64	2939.23	13	RPS27A	hsa:6233; P02248; P02249; P02250; P14798; P62979; P62988; Q29120; Q6LBL4; Q6LDU5; Q8WYN8; Q91887; Q91888; Q9BQ77; Q9BWD6; Q9BX98; Q9UEF2; Q9UEG1; Q9UEK8; Q9UPK7	0	1.492	0.980663	73.55	76.7	123.3	25.04	35.34	1
O95573	Fatty acid CoA ligase Acsl3 OS=Homo sapiens OX=9606 GN=ACSL3 PE=1 SV=3	0	170.281	39	20	839	19	720	80.4	8.38	1228.53	20	ACSL3	hsa:2181; O95573; Q60I92; Q8IUM9	0	1.836	0.940848	57.54	67.5	132.5	29.55	30.27	1
Q68CZ2	Tensin-3 OS=Homo sapiens OX=9606 GN=TNS3 PE=1 SV=2	0	169.772	24	20	540	19	1445	155.2	6.81	959.52	20	TNS3	B2RNV1; hsa:64759; Q68CZ2; Q6IPQ2; Q8IZW7; Q8NAD0; Q96PE0; Q96S48	0	1.435	0.988179	70.31	114.1	85.9	13.84	54.77	1
Q9Y2T3	Guanine deaminase OS=Homo sapiens OX=9606 GN=GDA PE=1 SV=1	0	169.588	63	18	654	18	454	51	5.68	1515.45	18	GDA	B4DTY5; hsa:9615; Q5SZC7; Q9H335; Q9ULG2; Q9Y2T3	0	0.955	0.971189	73.91	119.8	80.2	27.07	50.95	1
P02786	Transferrin receptor protein 1 OS=Homo sapiens OX=9606 GN=TFRC PE=1 SV=2	0	168.762	39	24	554	24	760	84.8	6.61	1161.25	24	TFRC	D3DXB0; hsa:7037; P02786; Q1HE24; Q59G55; Q9UCN0; Q9UCU5; Q9UDF9; Q9UK21	0	3.941	0.165309	93.97	20.3	179.7	77.52	57.23	1
P35442	Thrombospondin-2 OS=Homo sapiens OX=9606 GN=THBS2 PE=1 SV=2	0	168.575	24	20	315	19	1172	129.9	4.83	665.02	20	THBS2	A6H8N1; A7E232; hsa:7058; P35442; Q5RI52	0	1.805	0.945498	92.2	18	182	177.43	112	1
Q14974	Importin subunit beta-1 OS=Homo sapiens OX=9606 GN=KPNB1 PE=1 SV=2	0	168.513	38	22	838	22	876	97.1	4.78	1859.7	22	KPNB1	B7ZAV6; D3DTT3; hsa:3837; Q14637; Q14974; Q53XN2; Q96J27	0	1.799	0.940848	49.88	65.1	134.9	29.47	13.98	1	Acetyl [N-Term]
P10253	Lysosomal alpha-glucosidase OS=Homo sapiens OX=9606 GN=GAA PE=1 SV=4	0	168.231	24	16	1022	15	952	105.3	6	2152.38	16	GAA	hsa:2548; P10253; Q09GN4; Q14351; Q16302; Q8IWE7	0	0.957	0.971272	73.67	103.1	96.9	24.67	41.36	1
P22695	Cytochrome b-c1 complex subunit 2, mitochondrial OS=Homo sapiens OX=9606 GN=UQCRC2 PE=1 SV=3	0	168.058	40	15	1380	15	453	48.4	8.63	3646.09	15	UQCRC2	B3KSN4; hsa:7385; P22695; Q9BQ05	0	1.124	0.992504	46.37	97.8	102.2	10.59	33.48	1
Q15365	Poly(rC)-binding protein 1 OS=Homo sapiens OX=9606 GN=PCBP1 PE=1 SV=2	0	167.971	54	9	868	7	356	37.5	7.09	2122.21	9	PCBP1	hsa:5093; Q13157; Q14975; Q15365	2	2.085	0.885171	51.14	60.8	139.2	27.41	29.92	1
Q53SF7	Cordon-bleu protein-like 1 OS=Homo sapiens OX=9606 GN=COBLL1 PE=1 SV=3	0	167.842	36	20	278	20	1128	123.8	6.58	413.25	20	COBLL1	A6NMZ3; hsa:22837; Q53SF7; Q6IQ33; Q7Z3I6; Q9BRH4; Q9UG88; Q9Y2I3	0	2.316	0.759802	75.16	46.2	153.8	39.41	130.53	1
P27348	14-3-3 protein theta OS=Homo sapiens OX=9606 GN=YWHAQ PE=1 SV=1	0	167.838	71	18	1069	14	245	27.7	4.78	2506.02	18	YWHAQ	D6W4Z5; hsa:10971; P27348; Q567U5; Q5TZU8; Q9UP48	0	1.563	0.975804	53.26	79.1	120.9	27.92	30.01	1	Acetyl [N-Term]
P40227	T-complex protein 1 subunit zeta OS=Homo sapiens OX=9606 GN=CCT6A PE=1 SV=3	0	167.748	42	19	1017	15	531	58	6.68	2768.53	19	CCT6A	A6NCD2; hsa:908; P40227; Q3KP28; Q75LP4; Q96S46	4	2.184	0.853141	55.87	64.8	135.2	13.88	24.99	1
Q15029	116 kDa U5 small nuclear ribonucleoprotein component OS=Homo sapiens OX=9606 GN=EFTUD2 PE=1 SV=1	0	167.727	40	21	584	21	972	109.4	5	981.45	21	EFTUD2	B4DK30; B4DMC0; D3DX58; hsa:9343; K7EJ81; Q15029; Q9BUR0	0	1.987	0.910953	60.07	95.8	104.2	39.07	32.39	1	Acetyl [N-Term]
Q14240	Eukaryotic initiation factor 4A-II OS=Homo sapiens OX=9606 GN=EIF4A2 PE=1 SV=2	0	167.679	54	19	1268	7	407	46.4	5.48	2581.39	19	EIF4A2	D3DNU9; hsa:1974; Q14240; Q53XJ6; Q96B90; Q96EA8	0	1.165	0.99383	56.51	96.1	103.9	62.46	52.72	1
P21397	Amine oxidase [flavin-containing] A OS=Homo sapiens OX=9606 GN=MAOA PE=1 SV=1	0	167.564	50	19	1199	15	527	59.6	7.85	2473.63	19	MAOA	B4DF46; hsa:4128; P21397; Q16426	0	0.89	0.954692	70.1	106.2	93.8	15.55	37.1	1
P02748	Complement component C9 OS=Homo sapiens OX=9606 GN=C9 PE=1 SV=2	0	167.314	42	19	621	19	559	63.1	5.59	1238.18	19	C9	hsa:735; P02748	0	1.149	0.99383	59.23	103.3	96.7	24.14	79	1
Q92973	Transportin-1 OS=Homo sapiens OX=9606 GN=TNPO1 PE=1 SV=2	0	167.278	38	21	622	19	898	102.3	4.98	1041.93	21	TNPO1	B4DVC6; hsa:3842; Q92957; Q92973; Q92975	2	1.834	0.940848	58.19	54.4	145.6	36	45.59	1
P08473	Neprilysin OS=Homo sapiens OX=9606 GN=MME PE=1 SV=2	0	167.116	46	21	99	21	750	85.5	5.73	185.64	21	MME	A8K6U6; D3DNJ9; hsa:4311; P08473; Q3MIX4	0	1.45	0.99383	83.51	79.5	120.5	65.2	172.9	1	Met-loss [N-Term]
Q86TG7	Retrotransposon-derived protein PEG10 OS=Homo sapiens OX=9606 GN=PEG10 PE=1 SV=2	0	167.079	48	20	285	20	708	80.1	6.39	480.99	20	PEG10	B4DSP0; hsa:23089; Q86TG7; Q96A68; Q9UPV1	0	2.179	0.853141	96.92	33.2	166.8	149.82	73.55	1
O15523	ATP-dependent RNA helicase DDX3Y OS=Homo sapiens OX=9606 GN=DDX3Y PE=1 SV=2	0	166.863	37	23	904	2	660	73.1	7.55	1793.24	23	DDX3Y	B4DK29; B4DXX7; hsa:8653; O15523; Q8IYV7	0	100	2.00326e-16			200		30.1	1
P10768	S-formylglutathione hydrolase OS=Homo sapiens OX=9606 GN=ESD PE=1 SV=2	0	166.758	66	13	663	13	282	31.4	7.02	1708.28	13	ESD	hsa:2098; P10768; Q5TBU8; Q5TBV0; Q5TBV2; Q9BVJ2	0	0.805	0.925961	85.33	106.6	93.4	18.12	58.27	1
Q06033	Inter-alpha-trypsin inhibitor heavy chain H3 OS=Homo sapiens OX=9606 GN=ITIH3 PE=1 SV=2	0	166.691	28	18	434	17	890	99.8	5.74	695.51	18	ITIH3	hsa:3699; Q06033; Q3B7H5; Q53F06; Q6LAM2; Q99085	1	1.405	0.989853	77.72	90.3	109.7	30.73	52.82	1
P54920	Alpha-soluble NSF attachment protein OS=Homo sapiens OX=9606 GN=NAPA PE=1 SV=3	0	166.336	65	16	867	16	295	33.2	5.36	2082.36	16	NAPA	A8K879; hsa:8775; P54920; Q96IK3; Q9BVJ3	0	1.32	0.99383	56.2	81.2	118.8	24.34	28.82	1
Q9Y265	RuvB-like 1 OS=Homo sapiens OX=9606 GN=RUVBL1 PE=1 SV=1	0	166.234	53	19	993	19	456	50.2	6.42	1732.12	19	RUVBL1	B2R5S0; hsa:8607; P82276; Q1KMR0; Q53HK5; Q53HL7; Q53Y27; Q9BSX9; Q9Y265	0	2.63	0.639766	62.05	55	145	27.64	44.51	1
P98095	Fibulin-2 OS=Homo sapiens OX=9606 GN=FBLN2 PE=1 SV=2	0	166.063	29	21	247	21	1184	126.5	4.82	375.36	21	FBLN2	B7Z9C5; hsa:2199; P98095; Q8IUI0; Q8IUI1	0	1.053	0.975926	98.86	80.8	119.2	151.42	60.72	1
Q12931	Heat shock protein 75 kDa, mitochondrial OS=Homo sapiens OX=9606 GN=TRAP1 PE=1 SV=3	0	166.003	48	25	1522	24	704	80.1	8.21	3692.98	25	TRAP1	B4DR68; D3DUC8; F5H897; hsa:10131; O43642; O75235; Q12931; Q9UHL5	0	1.537	0.975926	57.56	77.8	122.2	8.09	36.2	1
P50895	Basal cell adhesion molecule OS=Homo sapiens OX=9606 GN=BCAM PE=1 SV=2	0	165.958	49	22	492	22	628	67.4	5.81	943.26	22	BCAM	A8MYF9; A9YWT5; A9YWT6; hsa:4059; P50895; Q86VC7	0	1.758	0.947874	105.92	74.9	125.1	46.83	100.55	1
P25325	3-mercaptopyruvate sulfurtransferase OS=Homo sapiens OX=9606 GN=MPST PE=1 SV=3	0	165.894	59	12	1392	11	297	33.2	6.6	4154.16	12	MPST	A8MZ34; B3KP52; hsa:4357; J3KPV7; O75750; P25325; Q6FHN9	0	1.212	0.998585	66.1	86.7	113.3	18.92	37.14	1
Q8WXH0	Nesprin-2 OS=Homo sapiens OX=9606 GN=SYNE2 PE=1 SV=3	0	165.87	8	43	224	43	6885	795.9	5.36	198.52	43	SYNE2	B4DND7; B4DPR6; hsa:23224; I6XXQ5; Q540G1; Q86YP9; Q8N1S3; Q8NF49; Q8TER7; Q8WWW3; Q8WWW4; Q8WWW5; Q8WXH0; Q8WXH1; Q9NU50; Q9UFQ4; Q9Y2L4; Q9Y4R1	0	1.417	0.9904	61.08	70.7	129.3	47.65	44.04	1
P63241	Eukaryotic translation initiation factor 5A-1 OS=Homo sapiens OX=9606 GN=EIF5A PE=1 SV=2	0	165.866	64	11	1171	8	154	16.8	5.24	3441.08	11	EIF5A	A8K9A0; D3DTP2; hsa:1984; P10159; P63241; Q16182; Q7L7L3; Q7Z4L1; Q9D0G2	3	1.463	0.984689	65.69	85.8	114.2	16.34	43.38	1	Met-loss+Acetyl [N-Term]
O95154	Aflatoxin B1 aldehyde reductase member 3 OS=Homo sapiens OX=9606 GN=AKR7A3 PE=1 SV=2	0	165.829	55	14	1272	9	331	37.2	7.15	2902.36	14	AKR7A3	hsa:22977; O95154; Q86SR4; Q8IVN6; Q8N5V6; Q8TAX1; Q9NUC3	5	0.204	0.00274375	94.95	172.3	27.7	33.06	83.11	1
P62917	60S ribosomal protein L8 OS=Homo sapiens OX=9606 GN=RPL8 PE=1 SV=2	0	165.483	50	12	320	12	257	28	11.03	724.84	12	RPL8	A8K094; D3DWN2; hsa:6132; P25120; P62917; Q567Q7; Q969V7; Q9BWQ9	0	2.012	0.902141	97.63	37.9	162.1	40.65	81.76	1
P36957	Dihydrolipoyllysine-residue succinyltransferase component of 2-oxoglutarate dehydrogenase complex, mitochondrial OS=Homo sapiens OX=9606 GN=DLST PE=1 SV=4	0	165.431	38	12	836	12	453	48.7	8.95	2129.94	12	DLST	B7Z5W8; E7ESY5; hsa:1743; P36957; Q7LDY7; Q9BQ32	0	1.01	0.978461	57.33	94.5	105.5	18.85	42.88	1
P21281	V-type proton ATPase subunit B, brain isoform OS=Homo sapiens OX=9606 GN=ATP6V1B2 PE=1 SV=3	0	165.291	56	19	674	19	511	56.5	5.81	1461.86	19	ATP6V1B2	B2R5Z3; D3DSQ5; hsa:526; P21281; Q14544; Q15859; Q96IR0	0	1.348	0.992504	76.54	90.8	109.2	54.15	38.38	1
P54855	UDP-glucuronosyltransferase 2B15 OS=Homo sapiens OX=9606 GN=UGT2B15 PE=1 SV=3	0	165.063	32	14	797	6	530	61	8.82	1387.28	14	UGT2B15	A6NDX0; A6NNJ4; A8K054; hsa:7366; P23765; P54855; Q9UK63	7	0.28	0.0262713	87.02	170.6	29.4	37.39	73.09	1
P62873	Guanine nucleotide-binding protein G(I)/G(S)/G(T) subunit beta-1 OS=Homo sapiens OX=9606 GN=GNB1 PE=1 SV=3	0	164.796	62	13	919	5	340	37.4	6	2580.23	13	GNB1	B1AJZ7; hsa:2782; P04697; P04901; P62873; Q1RMY8	2	1.366	0.992504	55.6	82.9	117.1	35.94	33.85	1	Met-loss+Acetyl [N-Term]
P12259	Coagulation factor V OS=Homo sapiens OX=9606 GN=F5 PE=1 SV=4	0	164.575	17	32	242	32	2224	251.5	6.05	329.09	32	F5	A8K6E8; hsa:2153; P12259; Q14285; Q2EHR5; Q5R346; Q5R347; Q6UPU6; Q8WWQ6	0	1.547	0.975926	69.58	65	135	40.34	62.05	1
P08729	Keratin, type II cytoskeletal 7 OS=Homo sapiens OX=9606 GN=KRT7 PE=1 SV=5	0	164.385	56	28	1337	21	469	51.4	5.48	2742.52	28	KRT7	hsa:3855; P08729; Q92676; Q9BUD8; Q9Y3R7	1	0.585	0.640596	106.49	182.4	17.6	67.68	164.57	1	Met-loss+Acetyl [N-Term]
P13674	Prolyl 4-hydroxylase subunit alpha-1 OS=Homo sapiens OX=9606 GN=P4HA1 PE=1 SV=2	0	164.265	43	18	605	18	534	61	6.01	1345.92	18	P4HA1	C9JL12; hsa:5033; P13674; Q15082; Q15083; Q5VSQ5	0	1.543	0.975926	69.88	92.2	107.8	51.34	60.21	1
P19827	Inter-alpha-trypsin inhibitor heavy chain H1 OS=Homo sapiens OX=9606 GN=ITIH1 PE=1 SV=3	0	164.008	31	16	519	16	911	101.3	6.79	1065.92	16	ITIH1	A8K9N5; B2RAH9; B7Z558; B7Z8C0; F5H165; F5H7Y8; hsa:3697; P19827; P78455; Q01746; Q562G1	0	1.792	0.943137	63.06	75.2	124.8	14.72	86.54	1
Q14376	UDP-glucose 4-epimerase OS=Homo sapiens OX=9606 GN=GALE PE=1 SV=2	0	163.831	62	14	755	14	348	38.3	6.73	1877.91	14	GALE	A0A024RAH5; B3KQ39; hsa:2582; Q14376; Q38G75; Q86W41; Q9BVE3; Q9UJB4	0	1.087	0.98901	67.04	101.9	98.1	35.54	57.77	1
O14880	Microsomal glutathione S-transferase 3 OS=Homo sapiens OX=9606 GN=MGST3 PE=1 SV=1	0	163.281	70	7	552	7	152	16.5	9.38	1588.37	7	MGST3	B2R592; hsa:4259; O14880; Q6ICN4	0	2.015	0.902141	99.71	58.3	141.7	36.95	66.68	1
P25205	DNA replication licensing factor MCM3 OS=Homo sapiens OX=9606 GN=MCM3 PE=1 SV=3	0	162.798	49	29	332	29	808	90.9	5.77	626.13	29	MCM3	B4DWW4; hsa:4172; P25205; Q92660; Q9BTR3; Q9NUE7	0	2.197	0.851349	61.68	40.1	159.9	36.36	63.18	1
P27105	Stomatin OS=Homo sapiens OX=9606 GN=STOM PE=1 SV=3	0	162.583	46	11	484	11	288	31.7	7.88	1395.5	11	STOM	B1AM77; hsa:2040; P27105; Q14087; Q15609; Q5VX96; Q96FK4	0	0.868	0.945498	106.5	100.6	99.4	21.98	46.45	1
P46459	Vesicle-fusing ATPase OS=Homo sapiens OX=9606 GN=NSF PE=1 SV=3	0	162.471	37	24	1123	24	744	82.5	6.95	1905.73	24	NSF	A8K2D9; B4DFA2; hsa:4905; P46459; Q8N6D7; Q9UKZ2	0	1.414	0.98901	45.95	84.8	115.2	22.5	22.17	1
P50416	Carnitine O-palmitoyltransferase 1, liver isoform OS=Homo sapiens OX=9606 GN=CPT1A PE=1 SV=2	0	162.428	40	23	931	23	773	88.3	8.65	1785.25	23	CPT1A	hsa:1374; P50416; Q8TCU0; Q9BWK0	0	1.257	0.998585	70.69	91.2	108.8	32.41	41.45	1	Met-loss+Acetyl [N-Term]
P51857	Aldo-keto reductase family 1 member D1 OS=Homo sapiens OX=9606 GN=AKR1D1 PE=1 SV=1	0	162.254	62	17	589	15	326	37.4	7.5	1200.03	17	AKR1D1	A1L4P6; A8K060; B4DPN3; B4DPN8; hsa:6718; P51857	0	0.218	0.00451659	63.97	195.7	4.3	56.28	112.53	1	Acetyl [N-Term]
Q9UHB6	LIM domain and actin-binding protein 1 OS=Homo sapiens OX=9606 GN=LIMA1 PE=1 SV=1	0	162.14	41	22	339	22	759	85.2	6.84	572.63	22	LIMA1	B2RB09; hsa:51474; Q2TAN7; Q59FE8; Q9BVF2; Q9H8J1; Q9HBN5; Q9NX96; Q9NXC3; Q9NXU6; Q9P0H8; Q9UHB5; Q9UHB6	0	1.429	0.98865	77.19	90.6	109.4	42.56	67.71	1
Q9Y6N5	Sulfide:quinone oxidoreductase, mitochondrial OS=Homo sapiens OX=9606 GN=SQOR PE=1 SV=1	0	162.074	41	17	939	17	450	49.9	9.11	2281.94	17	SQOR	hsa:58472; Q9UQM8; Q9Y6N5	0	1.234	0.999419	65.6	87.2	112.8	22.49	64.95	1
P27487	Dipeptidyl peptidase 4 OS=Homo sapiens OX=9606 GN=DPP4 PE=1 SV=2	0	162.045	38	26	618	26	766	88.2	6.04	1161.5	26	DPP4	hsa:1803; P27487; Q53TN1	0	2.31	0.790127	96.72	46.6	153.4	77.52	128.83	1
Q15293	Reticulocalbin-1 OS=Homo sapiens OX=9606 GN=RCN1 PE=1 SV=1	0	161.602	57	16	547	16	331	38.9	5	1208.64	16	RCN1	B7Z1M1; D3DR00; hsa:5954; Q15293	0	1.026	0.980663	73.04	89	111	20.47	42.01	1
Q92499	ATP-dependent RNA helicase DDX1 OS=Homo sapiens OX=9606 GN=DDX1 PE=1 SV=2	0	161.492	39	23	681	23	740	82.4	7.23	1288.82	23	DDX1	B4DME8; B4DPN6; hsa:1653; Q92499	0	1.446	0.984689	63.16	91.9	108.1	15.02	25	1
P22897	Macrophage mannose receptor 1 OS=Homo sapiens OX=9606 GN=MRC1 PE=1 SV=1	0	161.432	25	25	446	25	1456	165.9	6.54	645.09	25	MRC1	A5PKW3; hsa:4360; P22897; Q5VSJ2; Q5VSK2	0	0.541	0.534992	58.67	115.1	84.9	53.22	52.6	1
P62879	Guanine nucleotide-binding protein G(I)/G(S)/G(T) subunit beta-2 OS=Homo sapiens OX=9606 GN=GNB2 PE=1 SV=3	0	161.351	68	15	867	6	340	37.3	6	2229.86	15	GNB2	B3KPU1; hsa:2783; P11016; P54312; P62879	9	1.034	0.980663	58.91	130.4	69.6	55.35	70.76	1	Met-loss+Acetyl [N-Term]
O15027	Protein transport protein Sec16A OS=Homo sapiens OX=9606 GN=SEC16A PE=1 SV=4	0	161.187	22	28	523	28	2357	251.7	5.8	477.32	28	SEC16A	A1YCA4; hsa:9919; J3KNL6; O15027; Q4G0D7; Q5SXP0; Q5SXP1; Q8N347; Q96HP1	0	1.734	0.953398	56.84	66.2	133.8	34.57	42.97	1
Q9Y4G6	Talin-2 OS=Homo sapiens OX=9606 GN=TLN2 PE=1 SV=4	0	161.083	12	25	731	12	2542	271.4	5.57	1645.26	25	TLN2	A6NLB8; hsa:83660; Q9Y4G6	0	0.944	0.945498	67.01	105.2	94.8	28.52	36.91	1
P48444	Coatomer subunit delta OS=Homo sapiens OX=9606 GN=ARCN1 PE=1 SV=1	0	160.789	50	23	1374	23	511	57.2	6.21	2721.53	23	ARCN1	B4E1X2; E9PEU4; hsa:372; P48444; Q52M80	0	1.513	0.978845	56.05	112.3	87.7	33.41	54.95	1	Met-loss [N-Term]
P48637	Glutathione synthetase OS=Homo sapiens OX=9606 GN=GSS PE=1 SV=1	0	160.742	48	18	727	18	474	52.4	5.92	1663.43	18	GSS	B2R697; B6F210; E1P5P9; hsa:2937; P48637; Q4TTD9	0	1.246	0.999419	62.46	82.9	117.1	12.43	33.7	1	Met-loss+Acetyl [N-Term]
Q9NRY4	Rho GTPase-activating protein 35 OS=Homo sapiens OX=9606 GN=ARHGAP35 PE=1 SV=3	0	160.655	28	27	194	27	1499	170.4	6.64	241.1	27	ARHGAP35	A7E2A4; hsa:2909; Q14452; Q9C0E1; Q9NRY4	0	1.748	0.956013	69.02	71.6	128.4	50.21	78.36	1
Q9UJZ1	Stomatin-like protein 2, mitochondrial OS=Homo sapiens OX=9606 GN=STOML2 PE=1 SV=1	0	160.606	53	17	487	17	356	38.5	7.39	1188.51	17	STOML2	B4E1K7; D3DRN3; hsa:30968; O60376; Q53G29; Q96FY2; Q9P042; Q9UJZ1	0	2.366	0.764914	63.92	48.2	151.8	20.44	32.06	1
O94925	Glutaminase kidney isoform, mitochondrial OS=Homo sapiens OX=9606 GN=GLS PE=1 SV=1	0	160.264	41	20	230	19	669	73.4	7.77	432.57	20	GLS	hsa:2744; O94925; Q9UL05; Q9UL06; Q9UL07; Q9UN40	1	1.206	0.984689	79.87	66.1	133.9	158.32	125.18	1
Q9Y6Q1	Calpain-6 OS=Homo sapiens OX=9606 GN=CAPN6 PE=1 SV=2	0	160.016	43	25	317	25	641	74.5	7.05	558.99	25	CAPN6	D3DUY7; hsa:827; Q9UEQ1; Q9UJA8; Q9Y6Q1	0	1.08	0.98865	103.57	96.1	103.9	38.05	82.98	1
P09104	Gamma-enolase OS=Homo sapiens OX=9606 GN=ENO2 PE=1 SV=3	0	159.6	55	15	1415	11	434	47.2	5.03	2869.83	15	ENO2	B7Z2X9; hsa:2026; P09104; Q96J33	0	0.983	0.953398	110.16	122.5	77.5	42.42	98.14	1
Q9UM54	Unconventional myosin-VI OS=Homo sapiens OX=9606 GN=MYO6 PE=1 SV=4	0	159.501	31	27	319	27	1294	149.6	8.53	360.41	27	MYO6	A6H8V4; E1P540; hsa:4646; Q5TEM5; Q5TEM6; Q5TEM7; Q9BZZ7; Q9UEG2; Q9UM54	0	1.49	0.980663	79.85	97	103	15.43	36.13	1	Acetyl [N-Term]
Q16181	Septin-7 OS=Homo sapiens OX=9606 GN=SEPTIN7 PE=1 SV=2	0	159.374	44	17	682	16	437	50.6	8.63	1347.86	17	SEPTIN7	hsa:989; Q16181; Q52M76; Q6NX50	0	0.982	0.975438	59.82	98.6	101.4	31.3	15.28	1
O15144	Actin-related protein 2/3 complex subunit 2 OS=Homo sapiens OX=9606 GN=ARPC2 PE=1 SV=1	0	159.289	61	19	945	19	300	34.3	7.36	1932.66	19	ARPC2	hsa:10109; O15144; Q92801; Q9P1D4	0	1.145	0.99383	50.23	90.9	109.1	30.26	33.62	1
Q3ZCM7	Tubulin beta-8 chain OS=Homo sapiens OX=9606 GN=TUBB8 PE=1 SV=2	0	159.243	29	11	2527	1	444	49.7	4.89	5184.73	11	TUBB8	hsa:347688; Q3ZCM7; Q5SQX9; Q8WZ78	0	2.021	0.905631	81.63	63.8	136.2	64.11	43.81	1
Q96AE4	Far upstream element-binding protein 1 OS=Homo sapiens OX=9606 GN=FUBP1 PE=1 SV=3	0	159.077	39	21	728	17	644	67.5	7.61	1494.48	21	FUBP1	hsa:8880; Q12828; Q96AE4	2	1.985	0.910953	84.34	59.7	140.3	40.63	49.12	1
P35520	Cystathionine beta-synthase OS=Homo sapiens OX=9606 GN=CBS PE=1 SV=2	0	158.659	44	18	620	18	551	60.5	6.65	1397.7	18	CBS	B2R993; D3DSK4; hsa:102724560; hsa:875; P35520; Q99425; Q9BWC5	0	0.456	0.31821	108.55	176.6	23.4	38.2	136.46	1
P50454	Serpin H1 OS=Homo sapiens OX=9606 GN=SERPINH1 PE=1 SV=2	0	158.599	38	13	1147	13	418	46.4	8.69	3404.99	13	SERPINH1	B3KVJ3; hsa:871; P29043; P50454; Q5XPB4; Q6NSJ6; Q8IY96; Q9NP88	0	1.327	0.99383	66.1	82.5	117.5	50.64	26.68	1
Q709F0	Acyl-CoA dehydrogenase family member 11 OS=Homo sapiens OX=9606 GN=ACAD11 PE=1 SV=3	0	158.491	40	22	545	22	780	87.2	8.02	910.98	22	ACAD11	hsa:84129; Q08AF0; Q658N9; Q658Y2; Q6ZND2; Q709F0; Q8WUT6; Q9H9R3	0	0.577	0.618992	84.47	140.7	59.3	25.63	37.87	1
Q9Y696	Chloride intracellular channel protein 4 OS=Homo sapiens OX=9606 GN=CLIC4 PE=1 SV=4	0	158.201	71	13	592	12	253	28.8	5.59	1039.98	13	CLIC4	hsa:25932; Q9UFW9; Q9UQJ6; Q9Y696	1	0.983	0.975438	64.89	100.5	99.5	25.8	43.3	1	Met-loss+Acetyl [N-Term]
Q9UKV3	Apoptotic chromatin condensation inducer in the nucleus OS=Homo sapiens OX=9606 GN=ACIN1 PE=1 SV=2	0	158.173	23	20	404	20	1341	151.8	6.43	601.2	20	ACIN1	B2RTT4; D3DS45; hsa:22985; O75158; Q9UG91; Q9UKV1; Q9UKV2; Q9UKV3	0	1.499	0.980663	81.67	52.6	147.4	43.79	36.61	1
O15371	Eukaryotic translation initiation factor 3 subunit D OS=Homo sapiens OX=9606 GN=EIF3D PE=1 SV=1	0	158.023	53	18	648	18	548	63.9	6.05	1184.75	18	EIF3D	A8MWD3; B2R7D4; B4DTF8; B4DVY1; hsa:8664; O15371; Q3MJD9; Q5M9Q6	0	1.968	0.911354	60.51	60.6	139.4	29.45	40.58	1
P51858	Hepatoma-derived growth factor OS=Homo sapiens OX=9606 GN=HDGF PE=1 SV=1	0	158.001	71	16	615	15	240	26.8	4.73	1180.59	16	HDGF	B3KU21; D3DVC9; hsa:3068; P51858; Q5SZ07; Q5SZ08; Q5SZ09	1	2.113	0.879499	80.77	50.6	149.4	56.19	50.48	1
P47756	F-actin-capping protein subunit beta OS=Homo sapiens OX=9606 GN=CAPZB PE=1 SV=5	0	157.981	63	18	1195	18	272	30.6	6	2961.64	18	CAPZB	hsa:832; P47756; Q32Q68; Q5U0L4; Q8TB49; Q9NUC4	0	1.159	0.99383	50.92	92.2	107.8	22.16	17.3	1
Q9UGT4	Sushi domain-containing protein 2 OS=Homo sapiens OX=9606 GN=SUSD2 PE=1 SV=1	0	156.577	38	16	317	16	822	90.2	6.28	658.34	16	SUSD2	hsa:56241; Q9H5Y6; Q9UGT4	0	0.649	0.725194	116.05	171.8	28.2	59.42	115.93	1
Q14353	Guanidinoacetate N-methyltransferase OS=Homo sapiens OX=9606 GN=GAMT PE=1 SV=1	0	156.554	79	10	736	10	236	26.3	6.14	1787.81	10	GAMT	A8K0A0; hsa:2593; Q14353; Q53Y34; Q8WVJ1	0	0.94	0.966611	95.48	117.5	82.5	34.03	77.06	1	Met-loss+Acetyl [N-Term]
P11215	Integrin alpha-M OS=Homo sapiens OX=9606 GN=ITGAM PE=1 SV=2	0	156.485	30	25	329	24	1152	127.1	7.23	542.22	25	ITGAM	hsa:3684; P11215; Q4VAK0; Q4VAK1; Q4VAK2	1	1.204	0.992504	98.54	134.4	65.6	30.55	165.62	1
P78329	Cytochrome P450 4F2 OS=Homo sapiens OX=9606 GN=CYP4F2 PE=1 SV=1	0	156.128	45	21	828	6	520	59.8	7.08	1779.22	21	CYP4F2	A0A024R7K3; A8K425; B4DV75; hsa:8529; P78329; Q16677; Q6NWT4; Q6NWT6; Q9NNZ0; Q9UIU8	14	0.302	0.0428898	99.56	175.2	24.8	41.73	83.14	1
P19623	Spermidine synthase OS=Homo sapiens OX=9606 GN=SRM PE=1 SV=1	0	155.955	81	17	526	17	302	33.8	5.49	971.09	17	SRM	B1AKP9; hsa:6723; P19623; Q15511	0	1.87	0.938291	84.24	69.5	130.5	46.88	102.4	1	Met-loss [N-Term]; Acetyl [N-Term]
P51570	Galactokinase OS=Homo sapiens OX=9606 GN=GALK1 PE=1 SV=1	0	155.671	49	13	1025	13	392	42.2	6.46	2853.12	13	GALK1	B2RC07; B4E1G6; P51570	0	1.337	0.99383	86.83	76.1	123.9	25.45	59.38	1
Q9Y6C2	EMILIN-1 OS=Homo sapiens OX=9606 GN=EMILIN1 PE=1 SV=3	0	155.406	29	20	549	20	1016	106.6	5.17	1074.02	20	EMILIN1	A0A0C4DFX3; A5PL03; H0Y7A0; hsa:11117; Q53SY9; Q96G58; Q96IH6; Q9UG76; Q9Y6C2	0	0.601	0.675607	71.34	156.4	43.6	28.67	93.68	1
Q02318	Sterol 26-hydroxylase, mitochondrial OS=Homo sapiens OX=9606 GN=CYP27A1 PE=1 SV=1	0	155.406	41	17	860	17	531	60.2	8.9	1645.94	17	CYP27A1	A8K303; hsa:1593; Q02318; Q6LDB4; Q86YQ6	0	1.014	0.978783	112.78	85.9	114.1	23.73	80.72	1
P15311	Ezrin OS=Homo sapiens OX=9606 GN=EZR PE=1 SV=4	0	155.146	35	28	1209	17	586	69.4	6.27	2493.66	28	EZR	E1P5A8; hsa:7430; P15311; P23714; Q4VX75; Q96CU8; Q9NSJ4	1	1.222	0.998585	80.51	80.9	119.1	28.67	47.94	1
P04181	Ornithine aminotransferase, mitochondrial OS=Homo sapiens OX=9606 GN=OAT PE=1 SV=1	0	155.01	48	15	294	15	439	48.5	7.03	490.1	15	OAT	D3DRF0; hsa:4942; P04181; Q16068; Q16069; Q68CS0; Q6IAV9; Q9UD03	0	1.837	0.940848	79.55	76.8	123.2	13.17	37.16	1
Q9UPN3	Microtubule-actin cross-linking factor 1, isoforms 1/2/3/4/5 OS=Homo sapiens OX=9606 GN=MACF1 PE=1 SV=4	0	154.878	7	37	262	35	7388	837.8	5.39	179.97	37	MACF1	B1ALC5; E9PJT0; hsa:23499; O75053; Q5VW20; Q8WXY1; Q8WXY2; Q96PK2; Q9H540; Q9UKP0; Q9ULG9; Q9UPN3	2	1.091	0.98921	54.55	119.1	80.9	29.23	105.16	1
P31937	3-hydroxyisobutyrate dehydrogenase, mitochondrial OS=Homo sapiens OX=9606 GN=HIBADH PE=1 SV=2	0	154.775	46	11	755	11	336	35.3	8.13	2210.47	11	HIBADH	hsa:11112; P31937; Q546Z2; Q9UDN3	0	0.72	0.871749	85.66	112	88	16.55	47.87	1
Q9NVA2	Septin-11 OS=Homo sapiens OX=9606 GN=SEPTIN11 PE=1 SV=3	0	154.51	43	19	864	11	429	49.4	6.81	1719.46	19	SEPTIN11	B7Z7Z6; E9KL32; hsa:55752; Q4W5G1; Q7L4N1; Q96SP1; Q9NVA2; Q9UFY9	8	0.885	0.953398	59.53	107.1	92.9	42.29	41.33	1	Met-loss+Acetyl [N-Term]
P26639	Threonine--tRNA ligase 1, cytoplasmic OS=Homo sapiens OX=9606 GN=TARS1 PE=1 SV=3	0	154.286	39	21	544	21	723	83.4	6.67	901.34	21	TARS1	A8K8I1; B4DEG8; hsa:6897; P26639; Q96FP5; Q9BWA6	0	1.311	0.993844	55.18	91.4	108.6	11.07	32.2	1
P19022	Cadherin-2 OS=Homo sapiens OX=9606 GN=CDH2 PE=1 SV=4	0	154.031	23	12	385	12	906	99.7	4.81	874.43	12	CDH2	A8MWK3; B0YIY6; hsa:1000; P19022; Q14923; Q8N173	0	1.411	0.98917	67.07	92.5	107.5	18.45	60.15	1
P16219	Short-chain specific acyl-CoA dehydrogenase, mitochondrial OS=Homo sapiens OX=9606 GN=ACADS PE=1 SV=1	0	154.005	55	17	1119	17	412	44.3	7.99	2871.05	17	ACADS	hsa:35; P16219; P78331	0	0.369	0.128116	79.14	155	45	28.96	47.81	1
P78509	Reelin OS=Homo sapiens OX=9606 GN=RELN PE=1 SV=3	0	153.984	11	30	178	30	3460	388.1	5.88	240.18	30	RELN	A4D0P9; A4D0Q0; hsa:5649; P78509; Q86UJ0; Q86UJ8; Q8NDV0; Q9UDQ2	0	1.823	0.945498	73.99	82	118	115.93	135.57	1
P07902	Galactose-1-phosphate uridylyltransferase OS=Homo sapiens OX=9606 GN=GALT PE=1 SV=3	0	153.804	57	13	716	13	379	43.3	6.99	1543.6	13	GALT	B4E097; E7ET32; hsa:2592; P07902; Q14355; Q14356; Q14357; Q14358; Q14359; Q14360; Q14361; Q14363; Q14364; Q14365; Q14369; Q14370; Q14371; Q14372; Q14373; Q14374; Q14375; Q14377; Q14378; Q14380; Q14381; Q14382; Q14383; Q14384; Q14385; Q14386; Q14387; Q14389; Q16766; Q53XK1; Q5VZ81; Q96BY1	0	1.033	0.980663	70.71	108	92	16.31	74.32	1
Q8WX93	Palladin OS=Homo sapiens OX=9606 GN=PALLD PE=1 SV=3	0	153.518	25	20	471	20	1383	150.5	7.09	814.87	20	PALLD	B3KTG2; B5MD56; B7ZMM5; hsa:23022; Q7L3E0; Q7Z3W0; Q86WE8; Q8N1M2; Q8WX93; Q9UGA0; Q9UQF5; Q9Y2J6; Q9Y3E9	0	0.779	0.911229	80.99	102.3	97.7	29.97	49.41	1
Q02928	Cytochrome P450 4A11 OS=Homo sapiens OX=9606 GN=CYP4A11 PE=1 SV=1	0	153.401	57	22	425	9	519	59.3	8.76	731.47	22	CYP4A11	hsa:1579; Q02928; Q06766; Q16865; Q16866; Q5VSP8; Q86SU6; Q8IWY5	13	0.485	0.394224	102.92	177	23	40.09	75.72	1
Q9Y3I0	RNA-splicing ligase RtcB homolog OS=Homo sapiens OX=9606 GN=RTCB PE=1 SV=1	0	153.333	45	18	634	18	505	55.2	7.23	1284.76	18	RTCB	B2R6A8; hsa:51493; Q6IAI0; Q9BWL4; Q9NTH1; Q9P037; Q9P0J3; Q9Y3I0	0	1.584	0.972752	47.42	78.8	121.2	26.63	31.79	1
Q92734	Protein TFG OS=Homo sapiens OX=9606 GN=TFG PE=1 SV=2	0	152.834	30	9	571	9	400	43.4	5.1	1192.19	9	TFG	D3DN49; G5E9V1; hsa:10342; K0J5S8; K0J6K2; Q15656; Q92734; Q969I2	0	1.524	0.977425	66.35	70.7	129.3	27.2	20.99	1	Acetyl [N-Term]
Q03252	Lamin-B2 OS=Homo sapiens OX=9606 GN=LMNB2 PE=1 SV=4	0	152.237	50	26	879	21	620	69.9	5.59	1637.04	26	LMNB2	hsa:84823; O75292; Q03252; Q14734; Q96DF6	0	0.851	0.940848	62.75	98.6	101.4	19.04	17.06	1
P51649	Succinate-semialdehyde dehydrogenase, mitochondrial OS=Homo sapiens OX=9606 GN=ALDH5A1 PE=1 SV=2	0	152.114	38	18	631	18	535	57.2	8.28	1490.23	18	ALDH5A1	B2RD26; G5E949; hsa:7915; P51649; Q546H9; Q8N3W6	0	0.625	0.725194	87.29	137.6	62.4	26.05	58.92	1
P34931	Heat shock 70 kDa protein 1-like OS=Homo sapiens OX=9606 GN=HSPA1L PE=1 SV=2	0	151.952	32	17	1978	1	641	70.3	6.02	4410.15	17	HSPA1L	A6NNB0; B0UXW8; hsa:3305; O75634; P34931; Q2HXR3; Q8NE72; Q96QC9; Q9UQM1	0	100	2.00326e-16			200		10.76	1
P13693	Translationally-controlled tumor protein OS=Homo sapiens OX=9606 GN=TPT1 PE=1 SV=1	0	151.562	83	9	991	7	172	19.6	4.93	2496.6	9	TPT1	B2R7E5; hsa:7178; P13693; Q6YLS2; Q7Z4J4; Q8TBK7; Q96EE2; Q9UC70	3	1.291	0.996481	58.03	82.5	117.5	19.97	31.21	1
P09493	Tropomyosin alpha-1 chain OS=Homo sapiens OX=9606 GN=TPM1 PE=1 SV=2	0	151.096	65	23	1222	10	284	32.7	4.74	2482.63	23	TPM1	B7Z5T7; D9YZV2; D9YZV3; D9YZV8; hsa:7168; P09493; P09494; P10469; Q6DV89; Q6DV90; Q7Z6L8; Q86W64; Q96IK2; Q9UCI1; Q9UCI2; Q9UCY9; Q9Y427	12	0.63	0.731733	75.58	120.8	79.2	25.8	28.9	1
Q9HAV4	Exportin-5 OS=Homo sapiens OX=9606 GN=XPO5 PE=1 SV=1	0	150.981	25	25	259	25	1204	136.2	5.8	432.67	25	XPO5	hsa:57510; Q5JTE6; Q96G48; Q96HN3; Q9BWM6; Q9BZV5; Q9H9M4; Q9HAV4; Q9NT89; Q9NW39; Q9ULC9	0	1.394	0.990707	75.76	75.6	124.4	25.13	48.2	1
P04632	Calpain small subunit 1 OS=Homo sapiens OX=9606 GN=CAPNS1 PE=1 SV=1	0	150.844	52	9	797	9	268	28.3	5.2	2051.94	9	CAPNS1	A8K0P1; hsa:826; P04632; Q8WTX3; Q96EW0	0	1.105	0.990707	46.88	90.2	109.8	25.41	32.11	1	Acetyl [N-Term]
P09622	Dihydrolipoyl dehydrogenase, mitochondrial OS=Homo sapiens OX=9606 GN=DLD PE=1 SV=2	0	150.576	33	11	839	11	509	54.1	7.85	2286.81	11	DLD	B2R5X0; B4DHG0; B4DT69; hsa:1738; P09622; Q14131; Q14167; Q59EV8; Q8WTS4	0	0.669	0.796877	53.74	120.3	79.7	20.26	29.61	1
P23396	40S ribosomal protein S3 OS=Homo sapiens OX=9606 GN=RPS3 PE=1 SV=2	0	150.554	75	19	1408	19	243	26.7	9.66	3093.08	19	RPS3	B2R7N5; hsa:6188; J3KN86; P23396; Q498B5; Q8NI95	0	1.578	0.972752	52.28	77.8	122.2	12.65	47.35	1
Q9NZ08	Endoplasmic reticulum aminopeptidase 1 OS=Homo sapiens OX=9606 GN=ERAP1 PE=1 SV=3	0	150.442	38	30	1087	30	941	107.2	6.46	1807.39	30	ERAP1	hsa:51752; O60278; Q6UWY6; Q8NEL4; Q8TAD0; Q9NZ08; Q9UHF8; Q9UKY2	0	0.731	0.8812	84.64	130.9	69.1	52.11	52.22	1
Q96I15	Selenocysteine lyase OS=Homo sapiens OX=9606 GN=SCLY PE=1 SV=4	0	149.979	63	15	485	15	445	48.1	7.12	1098.83	15	SCLY	B9A068; hsa:51540; J3KN06; Q53SN1; Q53SN8; Q7L670; Q96I15; Q9NVT7; Q9NZR7	0	0.899	0.956013	76.56	126.9	73.1	22.64	71.06	1	Acetyl [N-Term]
P60660	Myosin light polypeptide 6 OS=Homo sapiens OX=9606 GN=MYL6 PE=1 SV=2	0	149.716	79	11	1665	9	151	16.9	4.65	3846.29	11	MYL6	hsa:4637; P16475; P24572; P24573; P60660; Q12790; Q561V9; Q6IAZ0; Q6IPY5	5	1.026	0.980663	59.32	100.1	99.9	38.29	35.25	1	Met-loss+Acetyl [N-Term]
P10620	Microsomal glutathione S-transferase 1 OS=Homo sapiens OX=9606 GN=MGST1 PE=1 SV=1	0	149.547	53	8	1406	8	155	17.6	9.39	3064.65	8	MGST1	A8K533; G5EA53; hsa:4257; P10620	0	0.66	0.781705	74.8	133.1	66.9	26.99	67.29	1
O75356	Nucleoside diphosphate phosphatase ENTPD5 OS=Homo sapiens OX=9606 GN=ENTPD5 PE=1 SV=1	0	149.503	58	15	903	15	428	47.5	6.33	2014.46	15	ENTPD5	A1L4C5; hsa:957; O75356; Q96RX0	0	1.053	0.984689	61.72	102.9	97.1	21.58	65.97	1
P51888	Prolargin OS=Homo sapiens OX=9606 GN=PRELP PE=1 SV=1	0	149.306	33	12	883	12	382	43.8	9.38	1820.27	12	PRELP	hsa:5549; P51888; Q6FG38	0	0.682	0.819168	70.39	134.3	65.7	38.41	59.84	1
P78347	General transcription factor II-I OS=Homo sapiens OX=9606 GN=GTF2I PE=1 SV=2	0	149.272	29	25	435	25	998	112.3	6.39	654.84	25	GTF2I	hsa:2969; O14743; O15359; O43546; O43588; O43589; P78347; Q75M85; Q75M86; Q75M87; Q75M88; Q86U51; Q9BSZ4	0	1.768	0.945942	73.59	66.4	133.6	38.91	41.38	1
Q9Y617	Phosphoserine aminotransferase OS=Homo sapiens OX=9606 GN=PSAT1 PE=1 SV=2	0	149.15	59	19	951	19	370	40.4	7.66	1903.66	19	PSAT1	hsa:29968; Q5T7G5; Q5T7G6; Q96AW2; Q9BQ12; Q9Y617	0	0.759	0.897282	100.45	129.9	70.1	25.6	88.38	1
Q00266	S-adenosylmethionine synthase isoform type-1 OS=Homo sapiens OX=9606 GN=MAT1A PE=1 SV=2	0	149.096	47	16	1102	14	395	43.6	6.29	2017.59	16	MAT1A	D3DWD5; hsa:4143; Q00266; Q5QP09	2	0.413	0.211929	86.79	156.8	43.2	33.69	63.21	1
Q15233	Non-POU domain-containing octamer-binding protein OS=Homo sapiens OX=9606 GN=NONO PE=1 SV=4	0	149.032	53	19	1040	18	471	54.2	8.95	1805.88	19	NONO	B7Z4C2; D3DVV4; F5GYZ3; hsa:4841; O00201; P30807; Q12786; Q15233; Q9BQC5	0	1.713	0.956013	97.71	62.6	137.4	48.54	57.03	1
Q9H2M3	S-methylmethionine--homocysteine S-methyltransferase BHMT2 OS=Homo sapiens OX=9606 GN=BHMT2 PE=1 SV=1	0	148.911	63	19	1067	13	363	40.3	5.87	2009.3	19	BHMT2	B7Z516; hsa:23743; Q9H2M3; Q9NXX7	0	0.261	0.0168591	83.36	187.1	12.9	53.04	101.39	1
P07951	Tropomyosin beta chain OS=Homo sapiens OX=9606 GN=TPM2 PE=1 SV=1	0	148.855	60	21	1508	6	284	32.8	4.7	3141.49	21	TPM2	A6NM85; hsa:7169; P06468; P07951; Q13894; Q53FM4; Q5TCU4; Q5TCU7; Q9UH67	0	0.652	0.73155	64.96	151.4	48.6	44.98	72.35	1
Q99715	Collagen alpha-1(XII) chain OS=Homo sapiens OX=9606 GN=COL12A1 PE=1 SV=2	0	148.583	11	27	453	27	3063	332.9	5.53	680.68	27	COL12A1	hsa:1303; O43853; Q15955; Q5VYK1; Q5VYK2; Q71UR3; Q99715; Q99716	0	1.345	0.993203	69.56	88.2	111.8	38.97	36.38	1
O43242	26S proteasome non-ATPase regulatory subunit 3 OS=Homo sapiens OX=9606 GN=PSMD3 PE=1 SV=2	0	148.551	43	23	795	23	534	60.9	8.44	1670.12	23	PSMD3	B3KMW9; B4DT72; hsa:5709; O43242; Q96EI2; Q9BQA4	0	1.407	0.989276	50.49	76.8	123.2	11.74	27.05	1
Q9ULA0	Aspartyl aminopeptidase OS=Homo sapiens OX=9606 GN=DNPEP PE=1 SV=2	0	148.297	54	16	519	16	485	53.4	7.58	801.91	16	DNPEP	hsa:23549; Q9BW44; Q9NUV5; Q9NV55; Q9ULA0	0	1.075	0.988179	75.39	91.1	108.9	12.27	39.46	1
P33991	DNA replication licensing factor MCM4 OS=Homo sapiens OX=9606 GN=MCM4 PE=1 SV=5	0	148.157	35	18	254	18	863	96.5	6.74	388.3	18	MCM4	hsa:4173; P33991; Q8NEH1; Q99658	0	2.252	0.826329	76.96	45.1	154.9	49.51	57.67	1
Q9GZM7	Tubulointerstitial nephritis antigen-like OS=Homo sapiens OX=9606 GN=TINAGL1 PE=1 SV=1	0	148.119	52	13	594	13	467	52.4	6.99	1049.62	13	TINAGL1	A8K9Q5; B4DPK6; D3DPN8; hsa:64129; Q8TEJ9; Q8WZ23; Q96GZ4; Q96JW3; Q9GZM7	0	0.846	0.940848	69.62	132.6	67.4	43.25	80.75	1
P13716	Delta-aminolevulinic acid dehydratase OS=Homo sapiens OX=9606 GN=ALAD PE=1 SV=1	0	147.942	62	16	827	16	330	36.3	6.79	1804.75	16	ALAD	A8K375; B2R6F2; hsa:210; P13716; Q16870; Q16871; Q9BVQ9	0	0.993	0.975926	111.61	109.1	90.9	38.98	94.3	1	Acetyl [N-Term]
P37059	17-beta-hydroxysteroid dehydrogenase type 2 OS=Homo sapiens OX=9606 GN=HSD17B2 PE=1 SV=1	0	147.933	41	15	822	15	387	42.8	8.5	2117.12	15	HSD17B2	B2R7T4; hsa:3294; P37059	0	0.8	0.923322	71.77	91.1	108.9	19.73	30.86	1
P30044	Peroxiredoxin-5, mitochondrial OS=Homo sapiens OX=9606 GN=PRDX5 PE=1 SV=4	0	147.828	57	14	1224	14	214	22.1	8.7	2949.15	14	PRDX5	A6NC19; A6NG06; B7ZLJ4; B7ZVW3; hsa:25824; P30044; Q14CK0; Q6IAF2; Q9UBU5; Q9UJU4; Q9UKX4	0	1.022	0.980438	68.44	104.7	95.3	16.85	49.06	1
P02766	Transthyretin OS=Homo sapiens OX=9606 GN=TTR PE=1 SV=1	0	147.787	69	11	729	11	147	15.9	5.76	2214.54	11	TTR	hsa:7276; P02766; Q549C7; Q6IB96; Q9UBZ6; Q9UCM9	0	1.58	0.972752	84.36	79.1	120.9	49.1	59.01	1
P62424	60S ribosomal protein L7a OS=Homo sapiens OX=9606 GN=RPL7A PE=1 SV=2	0	147.77	50	15	652	15	266	30	10.61	1485.39	15	RPL7A	hsa:6130; P11518; P62424; Q5T8U4	0	1.532	0.975926	68.71	84.1	115.9	12.01	29.77	1
Q9BR76	Coronin-1B OS=Homo sapiens OX=9606 GN=CORO1B PE=1 SV=1	0	147.763	39	14	760	14	489	54.2	5.88	1341.21	14	CORO1B	B2RD45; hsa:57175; Q9BR76	0	1.116	0.992504	55.05	96.8	103.2	20.24	36.52	1
Q562R1	Beta-actin-like protein 2 OS=Homo sapiens OX=9606 GN=ACTBL2 PE=1 SV=2	0	147.675	41	15	3105	3	376	42	5.59	5485.01	15	ACTBL2	B2RPJ1; hsa:345651; Q562R1; Q562R2; Q562S9; Q562X8	0	1.073	0.988179	59.89	104.3	95.7	22.22	29.72	1
O75131	Copine-3 OS=Homo sapiens OX=9606 GN=CPNE3 PE=1 SV=1	0	147.609	40	20	779	20	537	60.1	5.85	1414.21	20	CPNE3	A8KA47; hsa:8895; O75131; Q8IYA1	0	1.838	0.940722	64.57	56.1	143.9	44.49	38.09	1
Q15366	Poly(rC)-binding protein 2 OS=Homo sapiens OX=9606 GN=PCBP2 PE=1 SV=1	0	147.494	55	9	730	6	365	38.6	6.79	1458.19	9	PCBP2	A8K7X6; B4DXP5; F8VYL7; G3V0E8; hsa:5094; I6L8F9; Q15366; Q32Q82; Q59HD4; Q68Y55; Q6IPF4; Q6PKG5	1	1.845	0.939417	87.83	87.4	112.6	17.21	43.52	1
Q14651	Plastin-1 OS=Homo sapiens OX=9606 GN=PLS1 PE=1 SV=2	0	147.3	38	17	768	11	629	70.2	5.41	1378.02	17	PLS1	A8K2Q1; D3DNG3; hsa:5357; Q14651; Q8NEG6	0	1.647	0.972713	62.47	58.3	141.7	47.08	37.49	1
P22234	Bifunctional phosphoribosylaminoimidazole carboxylase/phosphoribosylaminoimidazole succinocarboxamide synthetase OS=Homo sapiens OX=9606 GN=PAICS PE=1 SV=3	0	147.144	54	20	934	20	425	47	7.23	1761.67	20	PAICS	E9PDH9; hsa:10606; P22234; Q68CQ5	0	1.433	0.988179	69.49	82.4	117.6	19.12	60.48	1	Met-loss+Acetyl [N-Term]
P15170	Eukaryotic peptide chain release factor GTP-binding subunit ERF3A OS=Homo sapiens OX=9606 GN=GSPT1 PE=1 SV=1	0	146.729	46	18	678	11	499	55.7	5.62	1151.28	18	GSPT1	hsa:2935; J3KQG6; P15170; Q96GF2	8	1.891	0.929221	66.6	69.4	130.6	69.48	25.83	1
Q9BXP5	Serrate RNA effector molecule homolog OS=Homo sapiens OX=9606 GN=SRRT PE=1 SV=1	0	146.68	30	19	328	19	876	100.6	5.96	564.42	19	SRRT	A4D2E5; A4D2E6; A6NK22; B4DJL4; B4DZA6; hsa:51593; O95808; Q32MI4; Q6NT74; Q8TDQ5; Q9BWP6; Q9BXP4; Q9BXP5; Q9Y4S4	0	1.952	0.915394	74.75	65.3	134.7	38.99	44.52	1
P48163	NADP-dependent malic enzyme OS=Homo sapiens OX=9606 GN=ME1 PE=1 SV=1	0	146.467	50	20	441	20	572	64.1	6.13	917.26	20	ME1	B4DZ70; hsa:4199; P48163; Q16797; Q16855; Q53F72; Q5VWA2; Q9BWX8; Q9H1W3; Q9UIY4	0	1.572	0.974042	94.44	103.3	96.7	32.44	117.08	1	Acetyl [N-Term]
O00159	Unconventional myosin-Ic OS=Homo sapiens OX=9606 GN=MYO1C PE=1 SV=4	0	145.715	33	24	584	24	1063	121.6	9.41	812.36	24	MYO1C	hsa:4641; O00159; Q4LE56; Q6NVJ7; Q86Y95	0	0.892	0.956013	71.61	88.4	111.6	35.3	140.96	1
P55265	Double-stranded RNA-specific adenosine deaminase OS=Homo sapiens OX=9606 GN=ADAR PE=1 SV=4	0	145.546	27	21	453	21	1226	136	8.65	656.98	21	ADAR	B1AQQ9; B1AQR0; D3DV76; hsa:103; O15223; O43859; O43860; P55265; Q9BYM3; Q9BYM4	0	1.833	0.940848	80.95	70.7	129.3	37.76	26.35	1
Q9NZL9	Methionine adenosyltransferase 2 subunit beta OS=Homo sapiens OX=9606 GN=MAT2B PE=1 SV=1	0	145.231	65	15	651	15	334	37.5	7.36	1396.38	15	MAT2B	B2R5Y6; hsa:27430; Q1WAI7; Q27J92; Q3LIE8; Q567T7; Q6NYC7; Q9BS89; Q9H3E1; Q9NZL9; Q9UJ54	0	1.07	0.986028	71.63	97	103	15.17	29.19	1
Q9NY33	Dipeptidyl peptidase 3 OS=Homo sapiens OX=9606 GN=DPP3 PE=1 SV=2	0	145.158	45	20	684	20	737	82.5	5.1	1656.67	20	DPP3	B2RDB5; B4DLX4; F5H8L6; hsa:10072; O95748; Q969H2; Q9BV67; Q9HAL6; Q9NY33	0	0.969	0.972752	55.79	105.4	94.6	16.25	39.18	1	Met-loss+Acetyl [N-Term]
P30405	Peptidyl-prolyl cis-trans isomerase F, mitochondrial OS=Homo sapiens OX=9606 GN=PPIF PE=1 SV=1	0	145.103	48	5	717	5	207	22	9.38	2206.93	5	PPIF	hsa:10105; P30405; Q2YDB7; Q5W131	0	0.733	0.8812	89.23	192.4	7.6	42.55	134.1	1
O75795	UDP-glucuronosyltransferase 2B17 OS=Homo sapiens OX=9606 GN=UGT2B17 PE=1 SV=1	0	145.019	29	12	656	3	530	61.1	8.54	1134.99	12	UGT2B17	hsa:7367; O75795	1	0.666	0.499708	132.84	155.1	44.9	83.49	94.51	1
P42126	Enoyl-CoA delta isomerase 1, mitochondrial OS=Homo sapiens OX=9606 GN=ECI1 PE=1 SV=1	0	144.883	49	12	865	12	302	32.8	8.54	2267.84	12	ECI1	A8K512; hsa:1632; P42126; Q13290; Q7Z2L6; Q7Z2L7; Q9BUB8; Q9BW05; Q9UDG6	0	0.844	0.940848	66.13	109.8	90.2	17.85	52.08	1
A5YKK6	CCR4-NOT transcription complex subunit 1 OS=Homo sapiens OX=9606 GN=CNOT1 PE=1 SV=2	0	144.844	16	29	173	29	2376	266.8	7.11	180.18	29	CNOT1	A5YKK6; hsa:23019; Q68DX7; Q7Z3K2; Q8IWB8; Q8TB53; Q9BVZ6; Q9UFR8; Q9UI27; Q9Y2L0	0	1.438	0.992504	53.07	33.8	166.2	63.28	42.91	1
P05387	60S acidic ribosomal protein P2 OS=Homo sapiens OX=9606 GN=RPLP2 PE=1 SV=1	0	144.378	81	8	806	8	115	11.7	4.54	2338.52	8	RPLP2	hsa:6181; P05387; Q6FG96	0	1.715	0.956013	52.67	76.5	123.5	12.62	39.34	1
P04899	Guanine nucleotide-binding protein G(i) subunit alpha-2 OS=Homo sapiens OX=9606 GN=GNAI2 PE=1 SV=3	0	144.376	45	15	917	11	355	40.4	5.54	1954.44	15	GNAI2	B3KTZ0; B4DYA0; B4E2X5; hsa:2771; P04899; Q6B6N3; Q8IZ71	5	0.858	0.943303	39.32	108.3	91.7	10.83	16.78	1
P62081	40S ribosomal protein S7 OS=Homo sapiens OX=9606 GN=RPS7 PE=1 SV=1	0	144.255	56	9	1096	9	194	22.1	10.1	3419.5	9	RPS7	hsa:6201; P23821; P24818; P62081; Q57Z92; Q6IPH1	0	2.091	0.883208	66.64	63.2	136.8	23.06	40.36	1
P68402	Platelet-activating factor acetylhydrolase IB subunit alpha2 OS=Homo sapiens OX=9606 GN=PAFAH1B2 PE=1 SV=1	0	143.78	58	7	449	7	229	25.6	5.92	1316.7	7	PAFAH1B2	A8DPS5; A8DPS6; A8DPS7; E9PEJ5; E9PLP3; hsa:5049; O00687; P68402; Q29459; Q6IBR6	0	1.517	0.978461	66.43	78.4	121.6	26.51	35.77	1	Met-loss+Acetyl [N-Term]
Q9Y6B6	GTP-binding protein SAR1b OS=Homo sapiens OX=9606 GN=SAR1B PE=1 SV=1	0	143.719	78	12	643	8	198	22.4	6.11	1556.13	12	SAR1B	D3DQA4; hsa:51128; Q567T4; Q9Y6B6	6	0.915	0.959595	68.65	112	88	20.19	46.78	1
O15031	Plexin-B2 OS=Homo sapiens OX=9606 GN=PLXNB2 PE=1 SV=3	0	143.519	19	25	462	25	1838	205	6.24	599.77	25	PLXNB2	A6QRH0; hsa:23654; O15031; Q7KZU3; Q9BSU7	0	1.234	0.999273	58.94	105.9	94.1	13.45	14.97	1
P23229	Integrin alpha-6 OS=Homo sapiens OX=9606 GN=ITGA6 PE=1 SV=5	0	143.372	27	22	274	22	1130	126.5	6.61	502.78	22	ITGA6	B2RMU9; B4DG69; B4DKB8; C4AM96; G5E9H1; hsa:3655; P23229; Q08443; Q0MRC7; Q14646; Q16508; Q53RX7; Q59HB7; Q86VL6; Q9UCT1; Q9UN03	0	1.935	0.928554	74.98	34.1	165.9	87.84	134.51	1
P55268	Laminin subunit beta-2 OS=Homo sapiens OX=9606 GN=LAMB2 PE=1 SV=2	0	143.265	23	24	446	24	1798	195.9	6.52	611.49	24	LAMB2	hsa:3913; P55268; Q16321	0	1.302	0.996481	71.48	73.7	126.3	42.64	50.53	1
P55735	Protein SEC13 homolog OS=Homo sapiens OX=9606 GN=SEC13 PE=1 SV=3	0	143.255	48	8	614	8	322	35.5	5.48	1533.4	8	SEC13	A8MV37; B4DXJ1; hsa:6396; P55735; Q5BJF0; Q9BRM6; Q9BUG7	0	1.418	0.98901	53.12	82.7	117.3	17.92	17.13	1	Met-loss+Acetyl [N-Term]
O75116	Rho-associated protein kinase 2 OS=Homo sapiens OX=9606 GN=ROCK2 PE=1 SV=4	0	143.217	24	29	325	25	1388	160.8	6.02	501.72	29	ROCK2	hsa:9475; O75116; Q53QZ0; Q53SJ7; Q9UQN5	4	1.411	0.98901	67.2	84.6	115.4	76.47	59.88	1
Q6DD88	Atlastin-3 OS=Homo sapiens OX=9606 GN=ATL3 PE=1 SV=1	0	142.93	40	16	433	15	541	60.5	5.66	1115.99	16	ATL3	hsa:25923; Q6DD88; Q8N7W5; Q9H8Q5; Q9UFL1	1	1.038	0.981934	70.08	87.9	112.1	23.03	32.84	1
Q709C8	Intermembrane lipid transfer protein VPS13C OS=Homo sapiens OX=9606 GN=VPS13C PE=1 SV=1	0	142.341	11	26	234	26	3753	422.1	6.83	200.69	26	VPS13C	hsa:54832; Q6ISR4; Q702P2; Q702P3; Q709C8; Q709C9; Q9NXN8; Q9P2C6	0	1.279	0.998449	73.87	133.6	66.4	15.36	42.1	1
O95373	Importin-7 OS=Homo sapiens OX=9606 GN=IPO7 PE=1 SV=1	0	142.239	26	21	406	21	1038	119.4	4.82	814.03	21	IPO7	A6NNM5; B2R786; hsa:10527; O95373; Q1RMF7; Q9H177; Q9NTE3	0	2.737	0.586074	55.73	43.7	156.3	44.07	20.14	1	Acetyl [N-Term]
P61604	10 kDa heat shock protein, mitochondrial OS=Homo sapiens OX=9606 GN=HSPE1 PE=1 SV=2	0	142.201	100	22	1549	22	102	10.9	8.92	2767.78	22	HSPE1	hsa:3336; O95421; P61604; Q04984; Q53X54; Q9UDH0	0	1.761	0.947273	55.85	70.8	129.2	21.49	54.07	1	Met-loss+Acetyl [N-Term]
P35998	26S proteasome regulatory subunit 7 OS=Homo sapiens OX=9606 GN=PSMC2 PE=1 SV=3	0	142.185	52	20	1168	20	433	48.6	5.95	2121.26	20	PSMC2	A4D0Q1; B7Z5E2; hsa:5701; P35998; Q3LIA5; Q9UDI3	0	1.465	0.984689	42.17	78.5	121.5	14.98	18.99	1	Met-loss [N-Term]
P20815	Cytochrome P450 3A5 OS=Homo sapiens OX=9606 GN=CYP3A5 PE=1 SV=1	0	142.173	39	18	567	12	502	57.1	8.75	973.5	18	CYP3A5	A4D289; B7Z5I7; hsa:1577; P20815; Q53WY8; Q75MV0; Q9HB56	0	1.102	0.96933	97.51	133.5	66.5	127.05	169.81	1
Q07960	Rho GTPase-activating protein 1 OS=Homo sapiens OX=9606 GN=ARHGAP1 PE=1 SV=1	0	142.043	52	16	769	16	439	50.4	6.29	1443.67	16	ARHGAP1	D3DQQ6; hsa:392; Q07960	0	1.329	0.99383	49.47	84.7	115.3	23.87	31.25	1
Q02750	Dual specificity mitogen-activated protein kinase kinase 1 OS=Homo sapiens OX=9606 GN=MAP2K1 PE=1 SV=2	0	142.014	56	15	545	10	393	43.4	6.62	965.04	15	MAP2K1	hsa:5604; Q02750	6	1.323	0.99383	50.9	90.3	109.7	18.51	46.11	1
Q92598	Heat shock protein 105 kDa OS=Homo sapiens OX=9606 GN=HSPH1 PE=1 SV=1	0	142.013	33	21	652	19	858	96.8	5.39	1447.16	21	HSPH1	B4DYH1; hsa:10808; O95739; Q5TBM6; Q5TBM7; Q5TBM8; Q92598; Q9UPC4	2	1.707	0.956683	65.34	55.7	144.3	76.97	42.44	1
P53602	Diphosphomevalonate decarboxylase OS=Homo sapiens OX=9606 GN=MVD PE=1 SV=1	0	141.588	58	12	520	12	400	43.4	7.23	1291.94	12	MVD	hsa:4597; P53602; Q53Y65	0	1.484	0.981272	91.86	105.5	94.5	50.37	103.15	1	Met-loss+Acetyl [N-Term]
P02749	Beta-2-glycoprotein 1 OS=Homo sapiens OX=9606 GN=APOH PE=1 SV=3	0	141.383	61	15	772	15	345	38.3	7.97	1775.26	15	APOH	B2R9M3; hsa:350; P02749; Q9UCN7	0	1.355	0.992504	80.13	89	111	42.99	83.16	1
P01834	Immunoglobulin kappa constant OS=Homo sapiens OX=9606 GN=IGKC PE=1 SV=2	0	141.368	86	7	676	2	107	11.8	6.52	1789.17	7	IGKC	A0A075B6H6; A0A087X130; P01834	0	1.121	0.992504	67.28	99.7	100.3	22.76	51.9	1
P05141	ADP/ATP translocase 2 OS=Homo sapiens OX=9606 GN=SLC25A5 PE=1 SV=7	0	140.851	57	20	1164	11	298	32.8	9.69	2360.07	20	SLC25A5	B2RCV1; hsa:292; O43350; P05141	9	1.164	0.99383	50.41	95	105	13.91	29.88	1	Met-loss+Acetyl [N-Term]
P35232	Prohibitin 1 OS=Homo sapiens OX=9606 GN=PHB1 PE=1 SV=1	0	140.777	74	15	1584	15	272	29.8	5.76	4177.16	15	PHB1	B4DY47; hsa:5245; P35232; Q4VBQ0	0	1.52	0.978461	42.26	74.3	125.7	12.22	21.32	1	Met-loss+Acetyl [N-Term]
Q9HB71	Calcyclin-binding protein OS=Homo sapiens OX=9606 GN=CACYBP PE=1 SV=2	0	140.498	57	12	476	12	228	26.2	8.25	899	12	CACYBP	B2ZWH2; B3KSF1; hsa:27101; O60666; Q5R370; Q5R371; Q9HB71	0	3.554	0.260754	79.17	22	178	61.17	44.55	1	Met-loss+Acetyl [N-Term]
Q9H223	EH domain-containing protein 4 OS=Homo sapiens OX=9606 GN=EHD4 PE=1 SV=1	0	140.425	48	21	704	16	541	61.1	6.76	1172.61	21	EHD4	hsa:30844; Q9H223; Q9HAR1; Q9NZN2	2	1.355	0.992504	65.94	109.6	90.4	43.59	46.02	1
P13645	Keratin, type I cytoskeletal 10 OS=Homo sapiens OX=9606 GN=KRT10 PE=1 SV=6	0	140.175	33	20	775	17	584	58.8	5.21	1375.75	20	KRT10	hsa:3858; P13645; Q14664; Q8N175	2	1.424	0.98865	73.7	83.5	116.5	24.52	47.37	1
P00736	Complement C1r subcomponent OS=Homo sapiens OX=9606 GN=C1R PE=1 SV=2	0	140.052	31	14	408	14	705	80.1	6.21	844.36	14	C1R	A6NJQ8; hsa:715; P00736; Q68D77; Q8J012	0	1.064	0.984689	57.73	120.4	79.6	36.49	65.03	1
Q13418	Integrin-linked protein kinase OS=Homo sapiens OX=9606 GN=ILK PE=1 SV=2	0	140.035	43	12	865	12	452	51.4	8.07	1894.3	12	ILK	B7Z1I0; B7Z418; D3DQU0; hsa:3611; P57043; Q13418; Q68DZ3	0	0.606	0.681778	50.77	129.2	70.8	19	47.4	1	Acetyl [N-Term]
Q14195	Dihydropyrimidinase-related protein 3 OS=Homo sapiens OX=9606 GN=DPYSL3 PE=1 SV=1	0	139.902	41	16	634	14	570	61.9	6.49	1239.2	16	DPYSL3	B3SXQ8; hsa:1809; Q14195; Q93012	0	0.702	0.852018	77.46	139.7	60.3	61.29	66.53	1
P62195	26S proteasome regulatory subunit 8 OS=Homo sapiens OX=9606 GN=PSMC5 PE=1 SV=1	0	139.003	55	18	1010	17	406	45.6	7.55	1987.51	18	PSMC5	A8K3Z3; A8K763; hsa:5705; O35051; O43208; P47210; P52915; P52916; P62195	1	1.602	0.972713	44.69	57.6	142.4	18.47	15.26	1	Met-loss+Acetyl [N-Term]
P38606	V-type proton ATPase catalytic subunit A OS=Homo sapiens OX=9606 GN=ATP6V1A PE=1 SV=2	0	138.92	55	20	844	20	617	68.3	5.52	1746.25	20	ATP6V1A	B2RBR8; B7Z1R5; D3DN75; hsa:523; P38606; Q53YD9; Q96DY6; Q9UHY3	0	1.441	0.985605	66.59	88.6	111.4	12.35	41.64	1
P49821	NADH dehydrogenase [ubiquinone] flavoprotein 1, mitochondrial OS=Homo sapiens OX=9606 GN=NDUFV1 PE=1 SV=4	0	138.889	44	16	613	16	464	50.8	8.21	1060.25	16	NDUFV1	hsa:4723; O60924; O60940; P49821; Q16104; Q6IBR3; Q96BF8; Q96HS7	0	0.771	0.910863	73.01	122.3	77.7	13.41	59.63	1
Q8WWI1	LIM domain only protein 7 OS=Homo sapiens OX=9606 GN=LMO7 PE=1 SV=3	0	138.835	19	22	438	22	1683	192.6	8.09	724.47	22	LMO7	E9PLH4; hsa:4008; O15462; O95346; Q5TBK6; Q8WWI1; Q9UKC1; Q9UQM5; Q9Y6A7	0	1.279	0.998449	71.27	86.6	113.4	18.29	65.84	1
P55060	Exportin-2 OS=Homo sapiens OX=9606 GN=CSE1L PE=1 SV=3	0	138.703	22	16	541	16	971	110.3	5.77	1075.87	16	CSE1L	A3RLL6; B2R5T4; E1P5Y0; F8W904; hsa:1434; O75432; P55060; Q32M40; Q9H5B7; Q9NTS0; Q9UP98; Q9UP99; Q9UPA0	0	1.533	0.975926	64.92	83.3	116.7	18.84	40.23	1
P54819	Adenylate kinase 2, mitochondrial OS=Homo sapiens OX=9606 GN=AK2 PE=1 SV=2	0	138.375	61	11	1102	11	239	26.5	7.81	2787.45	11	AK2	A8K6L1; B4DHH7; B4DL64; hsa:204; P54819; Q16856; Q5EB54; Q5TIF7; Q8TCY2; Q8TCY3	0	0.757	0.897282	49.51	120.5	79.5	25.73	39.47	1	Met-loss [N-Term]
Q9UDY2	Tight junction protein ZO-2 OS=Homo sapiens OX=9606 GN=TJP2 PE=1 SV=2	0	138.354	31	23	480	23	1190	133.9	7.4	713.91	23	TJP2	A2A3H9; B7Z2R8; B7Z7T6; F5H301; F5H886; hsa:9414; Q15883; Q5VXL0; Q5VXL1; Q8N756; Q8NI14; Q99839; Q9UDY0; Q9UDY1; Q9UDY2	0	1.495	0.980663	75.74	81.2	118.8	24.69	42.26	1
Q02338	D-beta-hydroxybutyrate dehydrogenase, mitochondrial OS=Homo sapiens OX=9606 GN=BDH1 PE=1 SV=3	0	138.046	57	17	1006	17	343	38.1	8.95	2090.01	17	BDH1	D3DXC0; hsa:622; Q02338; Q96ET1; Q9BRZ4	0	0.441	0.283423	89.85	163	37	33.38	82.23	1
P05556	Integrin beta-1 OS=Homo sapiens OX=9606 GN=ITGB1 PE=1 SV=2	0	137.997	33	20	912	20	798	88.4	5.39	1547.83	20	ITGB1	A8K6N2; D3DRX9; D3DRY3; D3DRY4; D3DRY5; hsa:3688; P05556; P78466; P78467; Q13089; Q13090; Q13091; Q13212; Q14622; Q14647; Q29RW2; Q7Z3V1; Q8WUM6	0	1.129	0.992504	80.51	89.3	110.7	26.35	38.1	1
Q13162	Peroxiredoxin-4 OS=Homo sapiens OX=9606 GN=PRDX4 PE=1 SV=1	0	137.96	53	13	806	11	271	30.5	6.29	1678.46	13	PRDX4	hsa:10549; Q13162; Q6FHT3	0	0.644	0.759693	79.88	123.9	76.1	45.51	48.67	1
O43852	Calumenin OS=Homo sapiens OX=9606 GN=CALU PE=1 SV=2	0	137.954	51	12	450	12	315	37.1	4.64	1342.13	12	CALU	B3KPG9; D6QS48; D6QS49; D6QS50; D6QS51; D6QS52; D6QS53; D6QS54; D6QS55; D6QS56; D6QS57; D6QS58; D6QS59; F5H1Q9; F5H879; hsa:813; O43852; O60456; Q6FHB9; Q96RL3; Q9NR43	0	1.749	0.952272	71.96	65.3	134.7	43.81	53.24	1
Q8N163	Cell cycle and apoptosis regulator protein 2 OS=Homo sapiens OX=9606 GN=CCAR2 PE=1 SV=2	0	137.854	38	21	514	21	923	102.8	5.22	979.34	21	CCAR2	A6NL03; B2RB79; D3DSR6; hsa:57805; Q6P0Q9; Q8N163; Q8N3G7; Q8N8M1; Q8TF34; Q9H9Q9; Q9HD12; Q9NT55	0	1.594	0.972752	76.21	62.2	137.8	41.16	72.22	1
O75153	Clustered mitochondria protein homolog OS=Homo sapiens OX=9606 GN=CLUH PE=1 SV=2	0	137.723	27	23	364	23	1309	146.6	6.13	569.28	23	CLUH	hsa:23277; O75153; Q6AHY2; Q6P3X7; Q6ZUG8; Q8N4U7; Q9BTA3; Q9H979	0	1.48	0.982679	63.37	76.8	123.2	22.1	52.51	1
Q02818	Nucleobindin-1 OS=Homo sapiens OX=9606 GN=NUCB1 PE=1 SV=4	0	137.633	48	19	665	19	461	53.8	5.25	1380.84	19	NUCB1	B2RD64; hsa:4924; Q02818; Q15838; Q7Z4J7; Q9BUR1	0	1.28	0.998449	75.93	77.4	122.6	27.87	43.85	1
P61224	Ras-related protein Rap-1b OS=Homo sapiens OX=9606 GN=RAP1B PE=1 SV=1	0	137.607	76	14	891	1	184	20.8	5.78	2009.44	14	RAP1B	B2R5Z2; B4DQI8; B4DW74; B4DW94; hsa:5908; P09526; P61224; Q502X3; Q5TZR4; Q6DCA1; Q6LES0	17	1.069	0.986028	54.87	105.9	94.1	16.4	33.85	1
O15143	Actin-related protein 2/3 complex subunit 1B OS=Homo sapiens OX=9606 GN=ARPC1B PE=1 SV=3	0	137.595	48	12	855	11	372	40.9	8.35	1926.98	12	ARPC1B	hsa:10095; O15143; Q9BU00	2	1.096	0.9904	66.03	106.5	93.5	47.96	20.7	1	Met-loss+Acetyl [N-Term]
P46952	3-hydroxyanthranilate 3,4-dioxygenase OS=Homo sapiens OX=9606 GN=HAAO PE=1 SV=2	0	137.576	63	15	1063	15	286	32.5	5.88	2369.21	15	HAAO	A6NE56; B4DIN2; hsa:23498; P46952; Q53QZ7; Q8N6N9	0	0.374	0.13584	109.4	128.7	71.3	33.57	53.97	1
Q92626	Peroxidasin homolog OS=Homo sapiens OX=9606 GN=PXDN PE=1 SV=2	0	137.429	21	18	313	18	1479	165.2	7.17	462.74	18	PXDN	A8QM65; D6W4Y0; hsa:7837; Q4KMG2; Q92626	0	1.26	0.998585	76.5	82.2	117.8	72.77	66.8	1
Q13177	Serine/threonine-protein kinase PAK 2 OS=Homo sapiens OX=9606 GN=PAK2 PE=1 SV=3	0	137.408	61	22	631	20	524	58	5.96	894.8	22	PAK2	hsa:5062; Q13154; Q13177; Q6ISC3	2	1.484	0.981272	51.47	70.7	129.3	30	29.87	1	Met-loss+Acetyl [N-Term]
Q9Y4W6	AFG3-like protein 2 OS=Homo sapiens OX=9606 GN=AFG3L2 PE=1 SV=2	0	137.375	30	19	538	18	797	88.5	8.66	917.74	19	AFG3L2	hsa:10939; Q6P1L0; Q9Y4W6	1	1.164	0.99383	57.35	91.3	108.7	9.39	52.14	1
P04275	von Willebrand factor OS=Homo sapiens OX=9606 GN=VWF PE=1 SV=4	0	137.143	14	27	359	27	2813	309.1	5.48	446.53	27	VWF	hsa:7450; P04275; Q8TCE8; Q99806	0	0.753	0.896853	94.19	89.7	110.3	41.11	52.2	1
P17301	Integrin alpha-2 OS=Homo sapiens OX=9606 GN=ITGA2 PE=1 SV=2	0	137.121	24	17	255	17	1181	129.2	5.25	423.24	17	ITGA2	hsa:3673; P17301; Q14595	0	2.097	0.8812	84.52	48.7	151.3	56.15	23.97	1
Q96N76	Urocanate hydratase OS=Homo sapiens OX=9606 GN=UROC1 PE=1 SV=1	0	136.823	36	16	425	16	676	74.8	6.79	941.63	16	UROC1	E9PE13; hsa:131669; Q14C64; Q68CJ7; Q96N76	0	0.318	0.0584633	84.1	191.5	8.5	62.19	91.95	1	Met-loss+Acetyl [N-Term]
O95336	6-phosphogluconolactonase OS=Homo sapiens OX=9606 GN=PGLS PE=1 SV=2	0	136.795	81	16	1237	16	258	27.5	6.05	3175.88	16	PGLS	hsa:25796; O95336	0	1.14	0.992504	53.39	99	101	9.37	36.97	1
Q9HCE1	Helicase MOV-10 OS=Homo sapiens OX=9606 GN=MOV10 PE=1 SV=2	0	136.508	29	22	348	22	1003	113.6	8.82	475.47	22	MOV10	hsa:4343; Q5JR03; Q8TEF0; Q9BSY3; Q9BUJ9; Q9HCE1	0	1.685	0.958162	74.95	93.6	106.4	83.29	37.24	1
Q15435	Protein phosphatase 1 regulatory subunit 7 OS=Homo sapiens OX=9606 GN=PPP1R7 PE=1 SV=1	0	136.143	61	18	676	18	360	41.5	4.91	1415.86	18	PPP1R7	B4DFD4; B5MCY6; hsa:5510; Q15435; Q9UQE5; Q9UQE6; Q9Y6K4	0	1.439	0.986028	52.91	90.8	109.2	15.75	42.87	1
O00754	Lysosomal alpha-mannosidase OS=Homo sapiens OX=9606 GN=MAN2B1 PE=1 SV=3	0	135.895	25	16	401	16	1011	113.7	7.28	704.64	16	MAN2B1	G5E928; hsa:4125; O00754; O15330; Q16680; Q93094; Q9BW13	0	1.262	0.998585	57.33	84.6	115.4	24.07	21.07	1
P42167	Lamina-associated polypeptide 2, isoforms beta/gamma OS=Homo sapiens OX=9606 GN=TMPO PE=1 SV=2	0	135.695	39	13	511	6	454	50.6	9.38	1319.89	13	TMPO	A2T926; hsa:7112; P42167; Q14861	0	2.804	0.537358	90.47	41.1	158.9	73.46	73.49	1	Met-loss [N-Term]
P28066	Proteasome subunit alpha type-5 OS=Homo sapiens OX=9606 GN=PSMA5 PE=1 SV=3	0	135.65	36	9	824	9	241	26.4	4.79	1956.46	9	PSMA5	B2R8F6; B4E2V4; hsa:5686; P28066; Q3T1C1; Q6IBF7	0	1.296	0.996481	41.94	84.7	115.3	12.97	21.71	1
Q04917	14-3-3 protein eta OS=Homo sapiens OX=9606 GN=YWHAH PE=1 SV=4	0	135.505	73	19	811	16	246	28.2	4.84	1515.15	19	YWHAH	hsa:7533; Q04917	1	1.477	0.983577	82.96	77.2	122.8	56.12	70.85	1	Met-loss+Acetyl [N-Term]
Q08477	Cytochrome P450 4F3 OS=Homo sapiens OX=9606 GN=CYP4F3 PE=1 SV=2	0	135.231	38	18	665	2	520	59.8	7.64	1241.41	18	CYP4F3	B7Z8Z3; hsa:4051; O60634; Q08477; Q5U740	2	0.542	0.211929	88.74	138.2	61.8	73.44	79.15	1
P16662	UDP-glucuronosyltransferase 2B7 OS=Homo sapiens OX=9606 GN=UGT2B7 PE=1 SV=2	0	134.971	42	14	667	10	529	60.7	8.31	1433.38	14	UGT2B7	B2R810; hsa:7364; P16662; Q6GTW0	2	0.226	0.0059454	98.65	173.5	26.5	30.35	34.96	1
Q14112	Nidogen-2 OS=Homo sapiens OX=9606 GN=NID2 PE=1 SV=3	0	134.886	19	19	451	18	1375	151.2	5.29	733.86	19	NID2	A8K6I7; B4DU19; hsa:22795; O43710; Q14112	0	1.233	0.998689	90.22	80.9	119.1	49.32	41.85	1
P49736	DNA replication licensing factor MCM2 OS=Homo sapiens OX=9606 GN=MCM2 PE=1 SV=4	0	134.872	24	15	348	15	904	101.8	5.52	655.75	15	MCM2	hsa:4171; P49736; Q14577; Q15023; Q8N2V1; Q969W7; Q96AE1; Q9BRM7	0	2.314	0.787714	48.14	47.4	152.6	22.65	37.11	1
Q9BTZ2	Dehydrogenase/reductase SDR family member 4 OS=Homo sapiens OX=9606 GN=DHRS4 PE=1 SV=3	0	134.584	34	10	342	10	278	29.5	8.56	980.95	10	DHRS4	B2RB10; B7WNS9; D3YTB8; E2QRL8; hsa:10901; O95162; Q20CR0; Q2LC19; Q2LE81; Q58IU4; Q6E0Y1; Q6UWU3; Q71UQ6; Q8TD03; Q9BTZ2; Q9H3N5; Q9NV08	0	0.782	0.911865	92.69	139.2	60.8	41.67	93.01	1
O95793	Double-stranded RNA-binding protein Staufen homolog 1 OS=Homo sapiens OX=9606 GN=STAU1 PE=1 SV=2	0	134.567	42	18	604	18	577	63.1	9.44	1016.9	18	STAU1	A8K9Z4; E1P5Y1; E1P608; hsa:6780; O95793; Q5JW29; Q6GTM4; Q9H5B4; Q9H5B5; Q9Y3Q2	0	2.131	0.873719	94.21	47.3	152.7	42.49	53.68	1
Q86WU2	Probable D-lactate dehydrogenase, mitochondrial OS=Homo sapiens OX=9606 GN=LDHD PE=1 SV=1	0	134.367	41	13	412	13	507	54.8	6.65	990.31	13	LDHD	hsa:197257; Q86WU2; Q8IZK5	0	0.272	0.0219336	61.55	171.4	28.6	32.65	75.62	1
P30046	D-dopachrome decarboxylase OS=Homo sapiens OX=9606 GN=DDT PE=1 SV=3	0	134.334	58	9	1919	9	118	12.7	7.3	4528.31	9	DDT	B7Z522; hsa:1652; O00774; O60787; P30046; Q13534	0	0.79	0.916313	73.41	100.3	99.7	37.38	32.22	1	Met-loss [N-Term]; Met-loss+Acetyl [N-Term]
P62136	Serine/threonine-protein phosphatase PP1-alpha catalytic subunit OS=Homo sapiens OX=9606 GN=PPP1CA PE=1 SV=1	0	134.041	63	13	881	4	330	37.5	6.33	1662.13	13	PPP1CA	A6NNR3; B2R908; hsa:5499; P08129; P20653; P22802; P62136; Q07161	11	2.003	0.905631	66.59	67.6	132.4	44.26	31.12	1
P13671	Complement component C6 OS=Homo sapiens OX=9606 GN=C6 PE=1 SV=3	0	133.933	23	13	170	13	934	104.7	6.76	325.71	13	C6	hsa:729; P13671	0	1.209	0.998449	95.52	125.1	74.9	45.39	55.1	1
Q32MZ4	Leucine-rich repeat flightless-interacting protein 1 OS=Homo sapiens OX=9606 GN=LRRFIP1 PE=1 SV=2	0	133.904	33	17	304	16	808	89.2	4.65	658.9	17	LRRFIP1	E9PGZ2; hsa:9208; O75766; O75799; Q32MZ4; Q32MZ5; Q53T49; Q6PKG2; Q9Y607	1	1.508	0.97911	51.14	65.8	134.2	35.65	17.05	1
P62140	Serine/threonine-protein phosphatase PP1-beta catalytic subunit OS=Homo sapiens OX=9606 GN=PPP1CB PE=1 SV=3	0	133.884	59	12	748	5	327	37.2	6.19	1550.42	12	PPP1CB	B2R5V4; D6W565; hsa:5500; P37140; P62140; Q5U087; Q6FG45	0	1.545	0.979682	67.11	87.5	112.5	29.52	49	1
P20839	Inosine-5'-monophosphate dehydrogenase 1 OS=Homo sapiens OX=9606 GN=IMPDH1 PE=1 SV=2	0	133.751	49	14	135	13	514	55.4	6.9	308.9	14	IMPDH1	A4D0Z6; A4D0Z7; A6NDW5; A6NNI6; B3KNP7; B3KVM8; B4DE09; C9JV30; hsa:3614; J3KNX8; P20839; Q8N194; Q96NU2	0	8.164	0.000141465	57.23	86.3	113.7	58.4	125.52	1
Q8TD19	Serine/threonine-protein kinase Nek9 OS=Homo sapiens OX=9606 GN=NEK9 PE=1 SV=2	0	133.62	28	17	260	17	979	107.1	5.74	450.79	17	NEK9	hsa:91754; Q52LK6; Q8NCN0; Q8TCY4; Q8TD19; Q9UPI4; Q9Y6S4; Q9Y6S5; Q9Y6S6	0	1.189	0.99383	62.35	95	105	32.1	44.63	1
Q00688	Peptidyl-prolyl cis-trans isomerase FKBP3 OS=Homo sapiens OX=9606 GN=FKBP3 PE=1 SV=1	0	133.585	50	12	567	12	224	25.2	9.28	1324.54	12	FKBP3	B2R4Q9; hsa:2287; Q00688; Q14317	0	1.687	0.957664	60.89	76.4	123.6	23.53	43.73	1
P07686	Beta-hexosaminidase subunit beta OS=Homo sapiens OX=9606 GN=HEXB PE=1 SV=4	0	133.439	39	18	800	17	556	63.1	6.76	1589.27	18	HEXB	hsa:3074; P07686	1	1.86	0.938291	75.83	88.9	111.1	21.12	123.26	1
Q06124	Tyrosine-protein phosphatase non-receptor type 11 OS=Homo sapiens OX=9606 GN=PTPN11 PE=1 SV=3	0	133.309	41	18	339	18	593	68	7.3	739.47	18	PTPN11	A8K1D9; hsa:5781; Q06124; Q96HD7	0	1.112	0.992504	82.45	161.3	38.7	72.23	57.66	1
P50053	Ketohexokinase OS=Homo sapiens OX=9606 GN=KHK PE=1 SV=2	0	133.232	57	12	925	12	298	32.5	6.32	2432.2	12	KHK	hsa:3795; P50053; Q6IBK2; Q99532; Q9BRJ3; Q9UMN1	0	0.518	0.485375	93.31	150.9	49.1	33.92	64.35	1
Q15046	Lysine--tRNA ligase OS=Homo sapiens OX=9606 GN=KARS1 PE=1 SV=3	0	133.129	46	19	579	19	597	68	6.35	1016.15	19	KARS1	A8MSK1; D3DUK4; hsa:3735; O14946; Q15046; Q96J25; Q9HB23	0	1.319	0.99383	48.36	82.6	117.4	15.94	26.86	1	Met-loss+Acetyl [N-Term]
P02765	Alpha-2-HS-glycoprotein OS=Homo sapiens OX=9606 GN=AHSG PE=1 SV=2	0	133.104	33	7	490	7	367	39.3	5.72	1434.02	7	AHSG	A8K9N6; B2R7G1; hsa:197; O14961; O14962; P02765; Q9P152	0	1.435	0.988179	89.91	95.2	104.8	23.51	97.66	1
O00231	26S proteasome non-ATPase regulatory subunit 11 OS=Homo sapiens OX=9606 GN=PSMD11 PE=1 SV=3	0	133.085	49	19	1048	19	422	47.4	6.48	2279.43	19	PSMD11	A8K3I7; E1P663; hsa:5717; O00231; O00495; Q53FT5	0	1.56	0.975926	46.68	68.5	131.5	27.94	39.89	1
Q15637	Splicing factor 1 OS=Homo sapiens OX=9606 GN=SF1 PE=1 SV=4	0	133.073	24	10	408	10	639	68.3	8.98	914.95	10	SF1	B7Z1Q1; C9JJE2; hsa:7536; Q14818; Q14819; Q15637; Q15913; Q8IY00; Q92744; Q92745; Q969H7; Q9BW01; Q9UEI0	0	2.281	0.806369	71.08	55.7	144.3	39.99	35.84	1
Q9P035	Very-long-chain (3R)-3-hydroxyacyl-CoA dehydratase 3 OS=Homo sapiens OX=9606 GN=HACD3 PE=1 SV=2	0	132.943	31	13	411	13	362	43.1	8.94	1086.79	13	HACD3	A0PJA1; B4DRF4; hsa:51495; Q280Z3; Q6PD63; Q8IUI5; Q8NC86; Q8NCB1; Q96T12; Q9NQA7; Q9P035	0	1.048	0.984689	80.78	105.1	94.9	22.5	70.03	1
O95394	Phosphoacetylglucosamine mutase OS=Homo sapiens OX=9606 GN=PGM3 PE=1 SV=1	0	132.833	38	18	677	18	542	59.8	6.25	1315.6	18	PGM3	B2RB65; B4DX94; D6RF12; E1P547; E9PF86; hsa:5238; O95394; Q5JWR4; Q96J46; Q9H8G5; Q9NS94; Q9NTT6; Q9UFV5; Q9UIY2	0	1.424	0.98865	59.66	88.4	111.6	16.98	35.22	1	Acetyl [N-Term]
P07585	Decorin OS=Homo sapiens OX=9606 GN=DCN PE=1 SV=1	0	132.685	46	14	800	14	359	39.7	8.54	1597.17	14	DCN	hsa:1634; P07585; Q9P0Z0; Q9P0Z1; Q9Y5N8; Q9Y5N9	0	0.451	0.309889	92.51	161.3	38.7	27.43	41.7	1
P08559	Pyruvate dehydrogenase E1 component subunit alpha, somatic form, mitochondrial OS=Homo sapiens OX=9606 GN=PDHA1 PE=1 SV=3	0	132.662	45	14	592	14	390	43.3	8.06	1307.33	14	PDHA1	A5YVE9; B2R5P7; B7Z3T7; B7Z3X5; hsa:5160; P08559; Q53H41; Q5JPT8; Q9NP12; Q9UBJ8; Q9UBU0; Q9UNG4; Q9UNG5	0	1.346	0.993203	71.57	80.1	119.9	22.34	48.69	1
P61586	Transforming protein RhoA OS=Homo sapiens OX=9606 GN=RHOA PE=1 SV=1	0	132.651	73	12	944	4	193	21.8	6.1	2619.65	12	RHOA	hsa:387; P06749; P61586; Q53HM4; Q5U024; Q9UDJ0; Q9UEJ4	10	1.351	0.992504	62.51	85.1	114.9	19.32	27.52	1
Q96TA1	Protein Niban 2 OS=Homo sapiens OX=9606 GN=NIBAN2 PE=1 SV=3	0	132.47	39	15	492	15	746	84.1	6.19	917.43	15	NIBAN2	hsa:64855; Q4LE55; Q5VVW6; Q5VVW7; Q96TA1; Q9BUS2; Q9NT35	0	1.237	0.999419	81.65	80.8	119.2	47.48	70.19	1
P37837	Transaldolase OS=Homo sapiens OX=9606 GN=TALDO1 PE=1 SV=2	0	132.428	44	21	1036	21	337	37.5	6.81	1917.37	21	TALDO1	B2R8M2; hsa:6888; O00751; P37837; Q8WV32; Q8WZ45	0	1.211	0.998585	56.52	92.5	107.5	14.04	43.12	1
P00491	Purine nucleoside phosphorylase OS=Homo sapiens OX=9606 GN=PNP PE=1 SV=2	0	132.415	66	16	635	16	289	32.1	6.95	1299.81	16	PNP	B2R8S5; D3DS00; hsa:4860; P00491; Q15160; Q5PZ03	0	0.93	0.964343	52.59	102.6	97.4	16.19	29.05	1	Acetyl [N-Term]
P51149	Ras-related protein Rab-7a OS=Homo sapiens OX=9606 GN=RAB7A PE=1 SV=1	0	132.332	71	15	1083	15	207	23.5	6.7	2448.08	15	RAB7A	A8K3V6; hsa:7879; P51149; Q9NWJ0; Q9UPB0	0	1.497	0.980663	43.62	90.9	109.1	15.65	21.28	1
P62834	Ras-related protein Rap-1A OS=Homo sapiens OX=9606 GN=RAP1A PE=1 SV=1	0	132.044	76	13	809	3	184	21	6.67	1710.01	13	RAP1A	hsa:5906; P10113; P62834	0	1.219	0.98865	56.15	102.9	97.1	40.19	66.87	1
P43686	26S proteasome regulatory subunit 6B OS=Homo sapiens OX=9606 GN=PSMC4 PE=1 SV=2	0	131.729	46	13	649	13	418	47.3	5.21	1256.36	13	PSMC4	hsa:5704; P43686; Q96FV5; Q9UBM3; Q9UEX3	0	1.554	0.975926	46	77.2	122.8	22.67	25.62	1
Q16881	Thioredoxin reductase 1, cytoplasmic OS=Homo sapiens OX=9606 GN=TXNRD1 PE=1 SV=3	0	131.694	40	18	313	17	649	70.9	7.39	693.23	18	TXNRD1	B7Z1F4; B7Z3Y8; B7Z904; E9PMY9; F5H780; hsa:7296; Q16881; Q6FI31; Q6VB40; Q6VB41; Q6VB42; Q6VBP2; Q6VBP3; Q6VBP4; Q6VBP5; Q6VBP9; Q6VBQ0; Q6YNQ1; Q76P53; Q7LA96; Q8WVC8; Q99475; Q9UES8; Q9UH79	1	1.64	0.966611	86.97	73	127	18.61	85.01	1
O75521	Enoyl-CoA delta isomerase 2 OS=Homo sapiens OX=9606 GN=ECI2 PE=1 SV=4	0	131.448	45	12	799	12	394	43.6	9	2279.96	12	ECI2	hsa:10455; O75521; Q5JYK5; Q5JYK7; Q7L124; Q8N0X0; Q9BUE9; Q9H0T9; Q9NQH1; Q9NYH7; Q9UN55	0	0.587	0.642058	98.73	133.5	66.5	32.82	82.64	1
O95202	Mitochondrial proton/calcium exchanger protein OS=Homo sapiens OX=9606 GN=LETM1 PE=1 SV=1	0	131.198	41	18	503	18	739	83.3	6.7	915.23	18	LETM1	B4DED2; hsa:3954; O95202; Q9UF65	0	2.04	0.896853	77.7	54.4	145.6	19.3	49.58	1
Q99829	Copine-1 OS=Homo sapiens OX=9606 GN=CPNE1 PE=1 SV=1	0	131.115	40	18	391	18	537	59	5.83	659.53	18	CPNE1	E1P5Q4; hsa:8904; Q6IBL3; Q99829; Q9H243; Q9NTZ7	0	1.655	0.964205	70.08	65.1	134.9	17.34	99.89	1	Met-loss+Acetyl [N-Term]
P50995	Annexin A11 OS=Homo sapiens OX=9606 GN=ANXA11 PE=1 SV=1	0	131.054	35	19	1029	18	505	54.4	7.65	2299.4	19	ANXA11	B4DVE7; hsa:311; P50995	1	1.227	0.998585	64.41	97	103	48.27	66.59	1
Q2TB90	Hexokinase HKDC1 OS=Homo sapiens OX=9606 GN=HKDC1 PE=1 SV=3	0	131.033	32	24	544	22	917	102.5	7.12	863.24	24	HKDC1	B5MDN9; hsa:80201; Q2TB90; Q2TB91; Q5VTC7; Q7Z373; Q8WU37; Q96EH2; Q9H5Y9	2	1.252	0.998585	84.66	82.9	117.1	50.87	61.55	1	Acetyl [N-Term]
Q9UL46	Proteasome activator complex subunit 2 OS=Homo sapiens OX=9606 GN=PSME2 PE=1 SV=4	0	131.015	59	11	886	11	239	27.4	5.73	2712.97	11	PSME2	hsa:5721; Q15129; Q9UL46	0	0.908	0.957664	70.8	107.8	92.2	21.11	56.84	1
P08236	Beta-glucuronidase OS=Homo sapiens OX=9606 GN=GUSB PE=1 SV=2	0	130.96	29	14	160	14	651	74.7	7.02	318.51	14	GUSB	B4E1F6; E9PCV0; hsa:2990; P08236; Q549U0; Q96CL9	0	1.32	0.998585	86.75	82.5	117.5	23.27	66.97	1
P61160	Actin-related protein 2 OS=Homo sapiens OX=9606 GN=ACTR2 PE=1 SV=1	0	130.748	42	12	1158	12	394	44.7	6.74	2618.12	12	ACTR2	B2RCP5; D6W5F4; E9PF41; hsa:10097; O15142; P61160; Q96C82	0	1.094	0.989643	47.5	90.9	109.1	28.43	16.43	1
Q9Y394	Dehydrogenase/reductase SDR family member 7 OS=Homo sapiens OX=9606 GN=DHRS7 PE=1 SV=1	0	130.722	47	13	741	13	339	38.3	8.32	1781.08	13	DHRS7	B2R896; hsa:51635; Q9UKU2; Q9Y394	0	1.122	0.992504	72.92	117	83	27.7	77.95	1
P22087	rRNA 2'-O-methyltransferase fibrillarin OS=Homo sapiens OX=9606 GN=FBL PE=1 SV=2	0	130.445	59	14	559	14	321	33.8	10.18	1289.19	14	FBL	B5BUE8; hsa:2091; O75259; P22087; Q6IAT5; Q9UPI6	0	2.265	0.813814	67.52	36.4	163.6	30.71	38.81	1
P14868	Aspartate--tRNA ligase, cytoplasmic OS=Homo sapiens OX=9606 GN=DARS1 PE=1 SV=2	0	130.209	51	23	1297	23	501	57.1	6.55	2245.38	23	DARS1	A8K3J2; D3DP77; hsa:1615; P14868; Q2TNI3; Q32Q69; Q53HV4; Q53YC5; Q68CR9; Q9BW52	0	1.825	0.940848	48.81	70.3	129.7	19.87	30.16	1
Q96QK1	Vacuolar protein sorting-associated protein 35 OS=Homo sapiens OX=9606 GN=VPS35 PE=1 SV=2	0	130.195	30	22	643	22	796	91.6	5.49	1034.71	22	VPS35	hsa:55737; Q561W2; Q96QK1; Q9H016; Q9H096; Q9H4P3; Q9H8J0; Q9NRS7; Q9NVG2; Q9NX80; Q9NZK2	0	1.23	0.998689	63.02	146	54	39.19	91.48	1	Met-loss [N-Term]
Q8NE62	Choline dehydrogenase, mitochondrial OS=Homo sapiens OX=9606 GN=CHDH PE=1 SV=2	0	130.05	39	16	442	16	594	65.3	8.28	740.79	16	CHDH	hsa:55349; Q8NE62; Q9NY17	0	0.724	0.874388	92.24	137.5	62.5	24.52	49.11	1
O15067	Phosphoribosylformylglycinamidine synthase OS=Homo sapiens OX=9606 GN=PFAS PE=1 SV=4	0	129.904	21	17	331	17	1338	144.6	5.76	556.44	17	PFAS	A6H8V8; hsa:5198; O15067	0	1.449	0.984689	57.13	75.5	124.5	14.95	27.25	1
P19971	Thymidine phosphorylase OS=Homo sapiens OX=9606 GN=TYMP PE=1 SV=2	0	129.772	49	16	957	16	482	49.9	5.53	2363.5	16	TYMP	A8MW15; H9KVA0; hsa:1890; P19971; Q13390; Q8WVB7	0	0.56	0.582358	88.12	138.3	61.7	18.09	68.66	1	Met-loss+Acetyl [N-Term]
Q9HBI6	Cytochrome P450 4F11 OS=Homo sapiens OX=9606 GN=CYP4F11 PE=1 SV=3	0	129.702	43	15	443	7	524	60.1	6.73	740.94	15	CYP4F11	A0A024R7G0; A8K059; hsa:57834; O75254; Q96AQ5; Q9HBI6	1	0.556	0.182333	107.77	157	43	56.18	170.67	1
P16278	Beta-galactosidase OS=Homo sapiens OX=9606 GN=GLB1 PE=1 SV=2	0	129.626	30	15	881	15	677	76	6.57	1481.97	15	GLB1	B2R7H8; B7Z6B0; hsa:2720; P16278; P16279	0	1.173	0.993844	67.56	75.1	124.9	22.59	35.18	1
P02452	Collagen alpha-1(I) chain OS=Homo sapiens OX=9606 GN=COL1A1 PE=1 SV=6	0	129.617	23	20	531	19	1464	138.8	5.8	814.75	20	COL1A1	hsa:1277; O76045; P02452; P78441; Q13896; Q13902; Q13903; Q14037; Q14992; Q15176; Q15201; Q16050; Q59F64; Q7KZ30; Q7KZ34; Q8IVI5; Q8N473; Q9UML6; Q9UMM7	1	0.756	0.896853	115.24	140.7	59.3	54.56	86.34	1
Q96NU7	Probable imidazolonepropionase OS=Homo sapiens OX=9606 GN=AMDHD1 PE=1 SV=2	0	129.309	45	14	479	14	426	46.7	6.61	1024.72	14	AMDHD1	A8K463; hsa:144193; Q68CI8; Q96NU7	0	0.762	0.900456	96.08	162.5	37.5	48.6	109.44	1	Met-loss+Acetyl [N-Term]
Q13740	CD166 antigen OS=Homo sapiens OX=9606 GN=ALCAM PE=1 SV=2	0	128.935	35	13	532	13	583	65.1	6.25	946.34	13	ALCAM	B2RNS3; B4DTU0; hsa:214; O60892; Q13740; Q1HGM8; Q1HGM9; Q6PEY4; Q6ZS95	0	1.953	0.915394	59.53	54.4	145.6	32.31	36.29	1
P06753	Tropomyosin alpha-3 chain OS=Homo sapiens OX=9606 GN=TPM3 PE=1 SV=2	0	128.903	54	17	1524	8	285	32.9	4.72	3465.85	17	TPM3	D3DV71; hsa:7170; P06753; P12324; Q2QD06; Q5VU58; Q5VU63; Q5VU66; Q5VU71; Q5VU72; Q8TCG3; Q969Q2; Q9NQH8	0	1.598	0.972735	60.66	73.6	126.4	41.31	34.91	1
Q13347	Eukaryotic translation initiation factor 3 subunit I OS=Homo sapiens OX=9606 GN=EIF3I PE=1 SV=1	0	128.785	46	12	620	12	325	36.5	5.64	1383.74	12	EIF3I	hsa:8668; Q13347	0	1.97	0.911354	52	66.4	133.6	17.17	28.46	1
P42166	Lamina-associated polypeptide 2, isoform alpha OS=Homo sapiens OX=9606 GN=TMPO PE=1 SV=2	0	128.653	35	18	573	11	694	75.4	7.66	1318.18	18	TMPO	P08918; P08919; P42166; Q14860; Q16295	8	2.099	0.8812	90.52	61.3	138.7	28.6	48	1	Met-loss [N-Term]
Q9NZM1	Myoferlin OS=Homo sapiens OX=9606 GN=MYOF PE=1 SV=1	0	128.59	14	24	252	23	2061	234.6	6.18	306.83	24	MYOF	B3KQN5; hsa:26509; Q5VWW2; Q5VWW3; Q5VWW4; Q5VWW5; Q7Z642; Q8IWH0; Q9HBU3; Q9NZM0; Q9NZM1; Q9ULL3; Q9Y4U4	1	0.854	0.940848	64.97	102.5	97.5	26.03	35.26	1
P09429	High mobility group protein B1 OS=Homo sapiens OX=9606 GN=HMGB1 PE=1 SV=3	0	128.547	40	12	683	10	215	24.9	5.74	1799.18	12	HMGB1	A5D8W9; hsa:3146; P09429; Q14321; Q5T7C3; Q6IBE1	3	1.761	0.947273	84.85	56.8	143.2	50.34	41.9	1
Q86UX7	Fermitin family homolog 3 OS=Homo sapiens OX=9606 GN=FERMT3 PE=1 SV=1	0	128.496	44	19	463	19	667	75.9	6.98	867.49	19	FERMT3	hsa:83706; Q86UX7; Q8IUA1; Q8N207; Q9BT48	0	0.758	0.897282	66.27	156.1	43.9	27.05	58.02	1
P08246	Neutrophil elastase OS=Homo sapiens OX=9606 GN=ELANE PE=1 SV=1	0	128.386	37	6	185	6	267	28.5	9.35	513.92	6	ELANE	hsa:1991; P08246; P09649; Q6B0D9; Q6LDP5	0	0.777	0.904782	136.4	165.4	34.6	58.01	207.95	1
Q03013	Glutathione S-transferase Mu 4 OS=Homo sapiens OX=9606 GN=GSTM4 PE=1 SV=3	0	128.321	44	10	203	2	218	25.5	5.9	535	10	GSTM4	A8K765; hsa:2948; Q03013; Q05465; Q32NC1; Q4JNT8; Q6FH87	0	0.292	0.00108746	78.03	115.2	84.8	138.89	59.51	1
P53999	Activated RNA polymerase II transcriptional coactivator p15 OS=Homo sapiens OX=9606 GN=SUB1 PE=1 SV=3	0	128.276	51	11	789	11	127	14.4	9.6	1964.15	11	SUB1	hsa:10923; P53999; Q96L29	0	1.711	0.956013	74.36	69.1	130.9	69.57	72.77	1
O14818	Proteasome subunit alpha type-7 OS=Homo sapiens OX=9606 GN=PSMA7 PE=1 SV=1	0	128.087	52	14	1168	14	248	27.9	8.46	3203.69	14	PSMA7	B2R515; hsa:5688; O14818; Q5JXJ2; Q9BR53; Q9H4K5; Q9UEU8	0	1.249	0.998689	40.11	88.9	111.1	20.09	23.26	1
P01008	Antithrombin-III OS=Homo sapiens OX=9606 GN=SERPINC1 PE=1 SV=1	0	128.058	42	17	581	17	464	52.6	6.71	1189.78	17	SERPINC1	B2R6P0; hsa:462; P01008; P78439; P78447; Q13815; Q5TC78; Q7KZ43; Q7KZ97; Q9UC78	0	1.061	0.984689	70.57	100.5	99.5	17.79	50.78	1
P01871	Immunoglobulin heavy constant mu OS=Homo sapiens OX=9606 GN=IGHM PE=1 SV=4	0	127.997	44	15	1049	2	453	49.4	6.77	1795.79	15			14	0.778	0.911229	88.7	126	74	36.4	70.41	1
P12429	Annexin A3 OS=Homo sapiens OX=9606 GN=ANXA3 PE=1 SV=3	0	127.975	60	17	218	17	323	36.4	5.92	457.51	17	ANXA3	B2R9W6; hsa:306; P12429; Q6LET2	0	1.684	0.958162	89.29	71.5	128.5	42.67	57.49	1
O75452	Retinol dehydrogenase 16 OS=Homo sapiens OX=9606 GN=RDH16 PE=1 SV=2	0	127.955	50	16	792	12	317	35.7	8.6	1834.93	16	RDH16	hsa:8608; O75452; Q9UNV2	3	0.084	3.62655e-07	122.1	195	5	49.26	128.46	1
Q01813	ATP-dependent 6-phosphofructokinase, platelet type OS=Homo sapiens OX=9606 GN=PFKP PE=1 SV=2	0	127.937	32	18	234	17	784	85.5	7.55	570.95	18	PFKP	B3KS15; hsa:5214; Q01813; Q5VSR7; Q5VSR8	0	1.328	0.996481	74.35	104.2	95.8	53.81	84.27	1
Q12882	Dihydropyrimidine dehydrogenase [NADP(+)] OS=Homo sapiens OX=9606 GN=DPYD PE=1 SV=2	0	127.823	27	18	447	18	1025	111.3	7.05	763.58	18	DPYD	A2RRQ2; A2RRQ3; A8K5A2; A8MWG9; B1AN21; E9PFN1; hsa:1806; Q12882; Q16694; Q16761; Q32NB0; Q96HL6; Q96TH1	0	0.934	0.9655	61.75	105.9	94.1	11.81	24.05	1
O00469	Procollagen-lysine,2-oxoglutarate 5-dioxygenase 2 OS=Homo sapiens OX=9606 GN=PLOD2 PE=1 SV=2	0	127.699	33	18	187	18	737	84.6	6.71	352.3	18	PLOD2	B3KWS3; hsa:5352; O00469; Q59ED2; Q8N170	0	1.665	0.966611	104.71	79.5	120.5	76.93	109.31	1
O76094	Signal recognition particle subunit SRP72 OS=Homo sapiens OX=9606 GN=SRP72 PE=1 SV=3	0	127.605	39	20	504	20	671	74.6	9.26	902.05	20	SRP72	G5E9Z8; hsa:6731; O76094; Q7Z3C0	0	1.583	0.972752	55.81	99.4	100.6	13.6	28	1
P61106	Ras-related protein Rab-14 OS=Homo sapiens OX=9606 GN=RAB14 PE=1 SV=4	0	127.553	74	14	1115	12	215	23.9	6.21	2889.62	14	RAB14	B3KR31; hsa:51552; P35287; P61106; Q5JVD4; Q6Q7K5; Q969L0; Q9UI11	2	1.468	0.984689	48.72	73.5	126.5	17.77	29.72	1
Q14839	Chromodomain-helicase-DNA-binding protein 4 OS=Homo sapiens OX=9606 GN=CHD4 PE=1 SV=2	0	127.215	14	19	271	13	1912	217.9	5.86	394.65	19	CHD4	hsa:1108; Q14839; Q8IXZ5	6	1.683	0.963764	58.79	52	148	50.37	26.42	1
Q16576	Histone-binding protein RBBP7 OS=Homo sapiens OX=9606 GN=RBBP7 PE=1 SV=1	0	127.104	51	11	309	8	425	47.8	5.05	523.51	11	RBBP7	hsa:5931; Q16576; Q5JP00	3	1.582	0.972752	70.17	80.7	119.3	31.74	38.2	1
Q53GQ0	Very-long-chain 3-oxoacyl-CoA reductase OS=Homo sapiens OX=9606 GN=HSD17B12 PE=1 SV=2	0	127.104	57	15	511	15	312	34.3	9.32	1263.75	15	HSD17B12	A8K9B0; D3DR23; hsa:51144; Q53GQ0; Q96EA9; Q96JU2; Q9Y6G8	0	1.025	0.980663	63.34	100.1	99.9	15.51	47.62	1
P08575	Receptor-type tyrosine-protein phosphatase C OS=Homo sapiens OX=9606 GN=PTPRC PE=1 SV=3	0	127.081	21	20	402	20	1306	147.4	6.15	733.54	20	PTPRC	A0A0A0MT22; A8K7W6; hsa:5788; P08575; Q16614; Q9H0Y6; X6R433	0	0.827	0.938291	74.42	128.2	71.8	41.63	58.97	1
Q13907	Isopentenyl-diphosphate Delta-isomerase 1 OS=Homo sapiens OX=9606 GN=IDI1 PE=1 SV=2	0	127.029	53	11	544	11	227	26.3	6.34	1221.07	11	IDI1	B4E155; hsa:3422; Q13907; Q32Q13; Q53GQ6; Q86U81; Q8WUX8; Q96IZ4; Q9BQ74	0	3.121	0.411168	109.13	48.8	151.2	41.6	84.17	1
P0DOX7	Immunoglobulin kappa light chain OS=Homo sapiens OX=9606 PE=1 SV=1	0	126.967	48	7	390	1	214	23.4	7.17	1046.18	7			10	1.489	0.980663	95.59	89	111	24.69	66.9	1
Q92747	Actin-related protein 2/3 complex subunit 1A OS=Homo sapiens OX=9606 GN=ARPC1A PE=1 SV=2	0	126.958	48	12	431	11	370	41.5	8.18	1038.35	12	ARPC1A	A4D276; B4DLQ7; D6W5S1; hsa:10552; Q7Z5U8; Q86WU5; Q8IXQ0; Q92747	0	1.319	0.99383	66.36	93.6	106.4	28.94	75.85	1	Met-loss+Acetyl [N-Term]
P20160	Azurocidin OS=Homo sapiens OX=9606 GN=AZU1 PE=1 SV=3	0	126.772	42	7	89	7	251	26.9	9.5	232.42	7	AZU1	hsa:566; P20160; P80014; Q52LG4; Q9UCM1; Q9UCT5	0	1.762	0.956801	93.37	133.4	66.6	40.52	168.13	1
P29692	Elongation factor 1-delta OS=Homo sapiens OX=9606 GN=EEF1D PE=1 SV=5	0	126.586	57	12	1139	11	281	31.1	5.01	2278.69	12	EEF1D	B4DDU4; D3DWK3; E9PBQ9; hsa:1936; P29692; Q4VBZ6; Q969J1; Q96I38	0	2.276	0.808147	62.17	62.1	137.9	26.99	35.65	1	Met-loss+Acetyl [N-Term]
P49321	Nuclear autoantigenic sperm protein OS=Homo sapiens OX=9606 GN=NASP PE=1 SV=2	0	126.522	26	12	269	12	788	85.2	4.3	449.59	12	NASP	A8K6H2; B4DQP3; D3DQ07; F5H3J2; hsa:4678; P49321; Q53GW5; Q5T622; Q5T625; Q96A69; Q9BTW2	0	1.688	0.957664	64.26	75.8	124.2	24.1	45.04	1
Q8NE71	ATP-binding cassette sub-family F member 1 OS=Homo sapiens OX=9606 GN=ABCF1 PE=1 SV=2	0	126.505	27	18	437	18	845	95.9	6.8	772.9	18	ABCF1	A2BF75; hsa:23; O14897; Q69YP6; Q8NE71	0	2.159	0.864997	60.66	59.2	140.8	14.17	41.96	1
P07307	Asialoglycoprotein receptor 2 OS=Homo sapiens OX=9606 GN=ASGR2 PE=1 SV=2	0	126.402	44	9	358	9	311	35.1	6.25	862.51	9	ASGR2	A6NLV8; A8MT12; D3DTM9; D3DTN0; hsa:433; O00448; P07307; Q03969	0	0.826	0.916313	110.81	126.4	73.6	14.4	147.15	1	Met-loss [N-Term]
P51884	Lumican OS=Homo sapiens OX=9606 GN=LUM PE=1 SV=2	0	126.274	34	13	964	13	338	38.4	6.61	1715.47	13	LUM	B2R6R5; hsa:4060; P51884; Q96QM7	0	0.494	0.417244	108.31	146	54	31.86	84.43	1
O00148	ATP-dependent RNA helicase DDX39A OS=Homo sapiens OX=9606 GN=DDX39A PE=1 SV=2	0	125.944	44	17	809	7	427	49.1	5.68	1462.37	17	DDX39A	B1Q2N1; hsa:10212; O00148; Q8N5M0; Q9BVP6; Q9H5W0	0	3.812	0.0982905	88.73	20.9	179.1	163.9	50.3	1	Met-loss+Acetyl [N-Term]
P53992	Protein transport protein Sec24C OS=Homo sapiens OX=9606 GN=SEC24C PE=1 SV=3	0	125.931	30	21	525	19	1094	118.2	7.06	798.25	21	SEC24C	B4DZT4; hsa:9632; P53992; Q8WV25	2	1.482	0.981348	60.51	67.3	132.7	23.8	40.27	1
P04004	Vitronectin OS=Homo sapiens OX=9606 GN=VTN PE=1 SV=1	0	125.871	45	14	1036	14	478	54.3	5.8	2160.45	14	VTN	B2R7G0; hsa:7448; P01141; P04004; Q9BSH7	0	1.907	0.925961	80.1	64	136	73.04	101.54	1
O00116	Alkyldihydroxyacetonephosphate synthase, peroxisomal OS=Homo sapiens OX=9606 GN=AGPS PE=1 SV=1	0	125.816	47	19	526	19	658	72.9	7.34	949.06	19	AGPS	A5D8U9; hsa:8540; O00116; Q2TU35	0	1.912	0.925961	61.05	66.2	133.8	15.53	46.22	1
P11310	Medium-chain specific acyl-CoA dehydrogenase, mitochondrial OS=Homo sapiens OX=9606 GN=ACADM PE=1 SV=1	0	125.781	44	15	994	15	421	46.6	8.37	2292.2	15	ACADM	hsa:34; P11310; Q5T4U4; Q9NYF1	0	0.461	0.330077	89.53	148.6	51.4	28.92	66.91	1
P04196	Histidine-rich glycoprotein OS=Homo sapiens OX=9606 GN=HRG PE=1 SV=1	0	125.715	25	11	638	11	525	59.5	7.5	1776.25	11	HRG	B9EK35; D3DNU7; hsa:3273; P04196	0	0.946	0.968009	77.12	112.4	87.6	46.8	75.32	1
Q96HY7	2-oxoadipate dehydrogenase complex component E1 OS=Homo sapiens OX=9606 GN=DHTKD1 PE=1 SV=2	0	125.531	24	14	485	14	919	103	6.93	1049.69	14	DHTKD1	hsa:55526; Q68CU5; Q96HY7; Q9BUM8; Q9HCE2	0	0.587	0.642144	60.47	139.1	60.9	23.92	44.19	1
P39656	Dolichyl-diphosphooligosaccharide--protein glycosyltransferase 48 kDa subunit OS=Homo sapiens OX=9606 GN=DDOST PE=1 SV=4	0	125.417	44	12	1283	12	456	50.8	6.55	2739.81	12	DDOST	B2RDQ4; B4DJE3; B4DLI2; hsa:1650; O43244; P39656; Q5VWA5; Q8NI93; Q9BUI2	0	1.188	0.996481	46.37	91.8	108.2	17.96	30.91	1
Q5VYK3	Proteasome adapter and scaffold protein ECM29 OS=Homo sapiens OX=9606 GN=ECPAS PE=1 SV=2	0	125.406	21	27	340	27	1845	204.2	7.12	421.23	27	ECPAS	O15074; Q5VYK3; Q8WU82	0	1.758	0.947874	58.87	67.5	132.5	39.43	28.15	1
Q27J81	Inverted formin-2 OS=Homo sapiens OX=9606 GN=INF2 PE=1 SV=2	0	125.376	27	17	227	17	1249	135.5	5.38	395.18	17	INF2	hsa:64423; Q27J81; Q27J83; Q69YL8; Q6P1X7; Q6PK22; Q86TR7; Q9BRM1; Q9H6N1	0	1.505	0.980438	58.1	68.5	131.5	38.08	37.63	1
P13611	Versican core protein OS=Homo sapiens OX=9606 GN=VCAN PE=1 SV=3	0	125.239	6	17	402	17	3396	372.6	4.51	773.19	17	VCAN	hsa:1462; P13611; P20754; Q13010; Q13189; Q15123; Q9UCL9; Q9UNW5	0	1.285	0.998449	112.36	63	137	169.11	92.9	1
O43143	ATP-dependent RNA helicase DHX15 OS=Homo sapiens OX=9606 GN=DHX15 PE=1 SV=2	0	125.196	30	20	650	19	795	90.9	7.46	1127.64	20	DHX15	hsa:1665; O43143; Q9NQT7	1	2.099	0.8812	60.21	64.3	135.7	21.87	36.19	1
Q9NR19	Acetyl-coenzyme A synthetase, cytoplasmic OS=Homo sapiens OX=9606 GN=ACSS2 PE=1 SV=1	0	125.076	22	9	251	9	701	78.5	6.46	735.32	9	ACSS2	A6NE90; hsa:55902; Q5QPH2; Q5QPH3; Q8N238; Q96EL0; Q9NQP7; Q9NR19; Q9UJ15	0	0.979	0.949298	92.57	131.6	68.4	53.85	133.08	1
P02730	Band 3 anion transport protein OS=Homo sapiens OX=9606 GN=SLC4A1 PE=1 SV=3	0	124.977	26	15	607	15	911	101.7	5.19	1526.09	15	SLC4A1	G4V2I6; hsa:6521; P02730; P78487; Q1ZZ45; Q4KKW9; Q4VB84; Q9UCY7; Q9UDJ1	0	0.639	0.753197	73.15	169.2	30.8	74.17	89.67	1
P43490	Nicotinamide phosphoribosyltransferase OS=Homo sapiens OX=9606 GN=NAMPT PE=1 SV=1	0	124.876	51	19	743	19	491	55.5	7.15	1183	19	NAMPT	A4D0Q9; A4D0R0; hsa:10135; P43490; Q3KQV0; Q8WW95	0	0.941	0.966611	73.7	109.1	90.9	26.23	56.25	1
P26440	Isovaleryl-CoA dehydrogenase, mitochondrial OS=Homo sapiens OX=9606 GN=IVD PE=1 SV=2	0	124.866	37	11	625	11	426	46.6	8.05	1459.28	11	IVD	B2RCV5; B3KVI7; hsa:3712; J3KR54; P26440; Q53XZ9; Q96AF6	0	0.583	0.633034	97.7	125.4	74.6	24.61	64.53	1
Q6NUN0	Acyl-coenzyme A synthetase ACSM5, mitochondrial OS=Homo sapiens OX=9606 GN=ACSM5 PE=1 SV=2	0	124.852	38	15	349	15	579	64.7	8.4	651.32	15	ACSM5	hsa:54988; Q6NUN0; Q96AV1; Q96CX8; Q9NWV3	0	0.405	0.194145	68.25	181	19	34.39	102.9	1
Q12805	EGF-containing fibulin-like extracellular matrix protein 1 OS=Homo sapiens OX=9606 GN=EFEMP1 PE=1 SV=2	0	124.772	32	11	410	11	493	54.6	5.07	773.31	11	EFEMP1	A8K3I4; B4DW75; D6W5D2; hsa:2202; Q12805; Q541U7	0	0.662	0.699729	104.17	126.6	73.4	112.71	102.68	1
P68036	Ubiquitin-conjugating enzyme E2 L3 OS=Homo sapiens OX=9606 GN=UBE2L3 PE=1 SV=1	0	124.598	71	11	353	5	154	17.9	8.51	858.09	11	UBE2L3	B2R4A7; B4DDG1; B4DSZ4; E7EWS7; hsa:7332; P51966; P68036; P70653; Q9HAV1	6	1.652	0.964343	73.12	73	127	27.12	21.5	1
Q5JRX3	Presequence protease, mitochondrial OS=Homo sapiens OX=9606 GN=PITRM1 PE=1 SV=3	0	124.403	32	22	545	22	1037	117.3	6.92	760.37	22	PITRM1	B3KMJ6; B4E0J8; C9JSL2; E7ES23; hsa:10531; O95204; Q2M2G6; Q4VBR1; Q5JRW7; Q5JRX3; Q7L5Z7; Q9BSI6; Q9BVJ5; Q9UPP8	0	1.158	0.99383	58.89	126.5	73.5	28.57	41.74	1
P27216	Annexin A13 OS=Homo sapiens OX=9606 GN=ANXA13 PE=1 SV=3	0	124.35	49	15	338	14	316	35.4	5.6	678.44	15	ANXA13	hsa:312; P27216; Q9BQR5	0	1.777	0.945498	65.63	74.7	125.3	53.27	49.75	1
P25786	Proteasome subunit alpha type-1 OS=Homo sapiens OX=9606 GN=PSMA1 PE=1 SV=1	0	124.156	62	13	682	13	263	29.5	6.61	1358.24	13	PSMA1	A8K400; hsa:5682; P25786; Q53YE8; Q9BRV9	0	1.378	0.992504	47.09	88.3	111.7	21.76	23.66	1
P61163	Alpha-centractin OS=Homo sapiens OX=9606 GN=ACTR1A PE=1 SV=1	0	124.122	55	12	615	6	376	42.6	6.64	1319.34	12	ACTR1A	B2R6B0; hsa:10121; P42024; P61163	6	1.1	0.9904	41.85	97.4	102.6	16.19	27.36	1	Acetyl [N-Term]
O00764	Pyridoxal kinase OS=Homo sapiens OX=9606 GN=PDXK PE=1 SV=1	0	124.055	58	12	395	12	312	35.1	6.13	1114.51	12	PDXK	hsa:8566; O00764; Q7Z2Y0; Q9BS02	0	1.292	0.996481	57.81	91.3	108.7	16.48	52.93	1
Q13451	Peptidyl-prolyl cis-trans isomerase FKBP5 OS=Homo sapiens OX=9606 GN=FKBP5 PE=1 SV=2	0	123.115	51	17	427	17	457	51.2	5.9	787.18	17	FKBP5	F5H7R1; hsa:2289; Q13451; Q59EB8; Q5TGM6	0	1.583	0.972752	64.71	74.4	125.6	25.56	49.14	1	Met-loss [N-Term]
Q6P996	Pyridoxal-dependent decarboxylase domain-containing protein 1 OS=Homo sapiens OX=9606 GN=PDXDC1 PE=1 SV=2	0	122.868	36	17	346	17	788	86.7	5.38	684.91	17	PDXDC1	B4DR55; B4DSL3; E7EMH5; E7EPL4; H3BNZ1; hsa:23042; O00236; Q4F6X7; Q6P996; Q6PID7; Q86YF1; Q8N4Q9; Q8TBS5	0	1.551	0.975926	68.67	117.1	82.9	24.74	53.03	1
Q9UGP8	Translocation protein SEC63 homolog OS=Homo sapiens OX=9606 GN=SEC63 PE=1 SV=2	0	122.833	25	14	287	14	760	87.9	5.31	497.58	14	SEC63	hsa:11231; O95380; Q5THN4; Q86VS9; Q8IWL0; Q9NTE0; Q9UGP8	0	1.785	0.945498	66.04	33.3	166.7	49.45	80.18	1
P46379	Large proline-rich protein BAG6 OS=Homo sapiens OX=9606 GN=BAG6 PE=1 SV=2	0	122.769	27	15	316	15	1132	119.3	5.6	463.63	15	BAG6	A2ADJ7; A3KQ42; A3KQ44; A6NGY6; A6PWF7; B0UX84; B4DZ12; B4E3V4; E7EMZ4; F8VXY4; hsa:7917; O95874; P46379; Q5HYL9; Q5SQ35; Q5SQ36; Q5SQ37; Q5SQ41; Q5SRP8; Q5SRP9; Q5STC1; Q5STX1; Q5STX3; Q96SA6; Q9BCN4	0	1.964	0.913854	63.13	51.8	148.2	46.66	42.7	1
Q96LJ7	Dehydrogenase/reductase SDR family member 1 OS=Homo sapiens OX=9606 GN=DHRS1 PE=1 SV=1	0	122.713	69	14	536	14	313	33.9	7.83	1193.75	14	DHRS1	D3DS71; hsa:115817; Q8NDG3; Q96B59; Q96CQ5; Q96LJ7	0	0.576	0.618493	80.45	148.6	51.4	46.2	56.58	1	Met-loss+Acetyl [N-Term]
P25787	Proteasome subunit alpha type-2 OS=Homo sapiens OX=9606 GN=PSMA2 PE=1 SV=2	0	122.71	63	12	1007	12	234	25.9	7.43	2483.27	12	PSMA2	hsa:5683; P25787; Q6ICS6; Q9BU45	0	1.214	0.998585	43.46	86.7	113.3	17.55	18.49	1
P12277	Creatine kinase B-type OS=Homo sapiens OX=9606 GN=CKB PE=1 SV=1	0	122.52	44	11	187	11	381	42.6	5.59	419.9	11	CKB	A8K236; B2R5R4; hsa:1152; P12277; Q2LE07; Q6FG40; Q9UC66	0	1.795	0.945498	67.46	91.7	108.3	29.39	74.74	1
P53597	Succinate--CoA ligase [ADP/GDP-forming] subunit alpha, mitochondrial OS=Homo sapiens OX=9606 GN=SUCLG1 PE=1 SV=4	0	122.465	34	11	562	11	346	36.2	8.79	1477.72	11	SUCLG1	hsa:8802; P53597; Q9BWB0; Q9UNP6	0	0.54	0.533195	77.79	134.2	65.8	25.4	77.88	1
P05198	Eukaryotic translation initiation factor 2 subunit 1 OS=Homo sapiens OX=9606 GN=EIF2S1 PE=1 SV=3	0	122.43	64	19	704	19	315	36.1	5.08	1609.18	19	EIF2S1	hsa:1965; P05198	0	1.802	0.940848	50.78	77.4	122.6	16.7	29.15	1
O60664	Perilipin-3 OS=Homo sapiens OX=9606 GN=PLIN3 PE=1 SV=3	0	122.282	43	11	508	11	434	47	5.44	1502.75	11	PLIN3	A8K4Y9; hsa:10226; K7EQF4; O60664; Q53G77; Q9BS03; Q9UBD7; Q9UP92	0	1.288	0.996481	64.76	87	113	38.33	49.11	1
Q92820	Gamma-glutamyl hydrolase OS=Homo sapiens OX=9606 GN=GGH PE=1 SV=2	0	122.261	42	13	774	13	318	35.9	7.11	1785.17	13	GGH	hsa:8836; Q92820	0	2.189	0.852018	104.15	59.4	140.6	24.51	92.98	1
P51911	Calponin-1 OS=Homo sapiens OX=9606 GN=CNN1 PE=1 SV=2	0	122.143	47	10	125	10	297	33.2	9.07	229.56	10	CNN1	B2R868; B4DUX6; hsa:1264; O00638; P51911; Q15416; Q8IY93; Q99438	0	0.963	0.972752	80.71	139.6	60.4	73.98	32.07	1
P22059	Oxysterol-binding protein 1 OS=Homo sapiens OX=9606 GN=OSBP PE=1 SV=1	0	121.997	30	16	400	15	807	89.4	7.3	638.22	16	OSBP	hsa:5007; P22059; Q6P524	2	1.328	0.99383	66.38	109.4	90.6	11.18	31.43	1
P38117	Electron transfer flavoprotein subunit beta OS=Homo sapiens OX=9606 GN=ETFB PE=1 SV=3	0	121.946	45	10	1497	10	255	27.8	8.1	3351.1	10	ETFB	A8K766; B3KNY2; hsa:2109; P38117; Q6IBH7; Q71RF6; Q9Y3S7	0	0.708	0.858524	69.44	126.4	73.6	22.63	58.16	1
O95210	Starch-binding domain-containing protein 1 OS=Homo sapiens OX=9606 GN=STBD1 PE=1 SV=1	0	121.936	46	11	645	11	358	39	5.73	1317.15	11	STBD1	B3KVZ9; hsa:8987; O95210	0	0.468	0.348003	79.77	158.2	41.8	28.54	71.87	1
Q99685	Monoglyceride lipase OS=Homo sapiens OX=9606 GN=MGLL PE=1 SV=2	0	121.88	55	11	284	11	303	33.2	6.99	574.68	11	MGLL	B3KRC2; B7Z9D1; hsa:11343; Q6IBG9; Q96AA5; Q99685	0	1.019	0.975926	81.57	120.2	79.8	37.84	90.17	1
P15428	15-hydroxyprostaglandin dehydrogenase [NAD(+)] OS=Homo sapiens OX=9606 GN=HPGD PE=1 SV=1	0	121.861	62	9	222	9	266	29	5.86	481.19	9	HPGD	B4DTA4; B4DU74; B4DV57; D3DP43; E7EV11; hsa:3248; O00749; P15428; Q06F08; Q12998	0	0.747	0.885171	113.38	151.2	48.8	42.66	128.43	1
P46926	Glucosamine-6-phosphate isomerase 1 OS=Homo sapiens OX=9606 GN=GNPDA1 PE=1 SV=1	0	121.86	42	7	586	5	289	32.6	6.92	1340.61	7	GNPDA1	B7Z3X4; D3DQE7; hsa:10007; P46926	3	1.021	0.979619	87.84	108.9	91.1	15.14	35.85	1
O43772	Mitochondrial carnitine/acylcarnitine carrier protein OS=Homo sapiens OX=9606 GN=SLC25A20 PE=1 SV=1	0	121.727	61	16	760	16	301	32.9	9.41	1560.86	16	SLC25A20	B2R7F4; hsa:788; O43772; Q9UIQ2	0	0.472	0.35672	78.7	140.6	59.4	17.31	81.61	1	Met-loss+Acetyl [N-Term]
Q9UMR2	ATP-dependent RNA helicase DDX19B OS=Homo sapiens OX=9606 GN=DDX19B PE=1 SV=1	0	121.724	38	15	489	1	479	53.9	6.3	949.66	15	DDX19B	B3KNE9; B4DXS6; E7EMK4; hsa:11269; Q6FIB7; Q6IAE0; Q96KE7; Q9H0U0; Q9UMR2	0	1.111	0.972713	28.88	92.9	107.1	16.96	43.8	1
Q9NUU7	ATP-dependent RNA helicase DDX19A OS=Homo sapiens OX=9606 GN=DDX19A PE=1 SV=1	0	121.674	45	17	507	3	478	53.9	6.58	970.64	17	DDX19A	B2RPL0; B4DRZ7; hsa:55308; Q53FM0; Q9NUU7	15	1.279	0.998449	47.43	71.3	128.7	27.1	30.07	1
O75367	Core histone macro-H2A.1 OS=Homo sapiens OX=9606 GN=MACROH2A1 PE=1 SV=5	0	121.623	53	18	628	16	369	39.2	9.83	1135.26	18	MACROH2A1	hsa:9555; O75367; O75377; Q503A8; Q7Z5E3; Q96D41; Q9H8P3; Q9UP96	2	1.95	0.916313	69.17	172.9	27.1	48.71	97.93	1
P47755	F-actin-capping protein subunit alpha-2 OS=Homo sapiens OX=9606 GN=CAPZA2 PE=1 SV=3	0	121.496	55	10	700	7	286	32.9	5.85	1265.53	10	CAPZA2	B4DG50; hsa:830; P47755	0	1.218	0.998585	54.23	95	105	38.17	22.17	1	Met-loss+Acetyl [N-Term]
P10515	Dihydrolipoyllysine-residue acetyltransferase component of pyruvate dehydrogenase complex, mitochondrial OS=Homo sapiens OX=9606 GN=DLAT PE=1 SV=3	0	121.349	31	14	539	14	647	69	7.84	1172.25	14	DLAT	hsa:1737; P10515; Q16783; Q53EP3	0	1.273	0.998449	70.15	84.4	115.6	23.1	62.26	1
Q12864	Cadherin-17 OS=Homo sapiens OX=9606 GN=CDH17 PE=1 SV=3	0	121.31	31	14	92	14	832	92.2	5.14	194.29	14	CDH17	hsa:1015; Q12864; Q15336; Q2M2E0	0	2.22	0.846055	72.47	44.5	155.5	93.7	168.84	1
P10643	Complement component C7 OS=Homo sapiens OX=9606 GN=C7 PE=1 SV=2	0	121.276	38	21	440	21	843	93.5	6.48	777.99	21	C7	A8K2T4; hsa:730; P10643; Q6P3T5; Q92489	0	1.004	0.975926	81.62	93.4	106.6	49.53	70.03	1
Q53FZ2	Acyl-coenzyme A synthetase ACSM3, mitochondrial OS=Homo sapiens OX=9606 GN=ACSM3 PE=1 SV=2	0	121.191	38	16	447	15	586	66.1	9.04	781.28	16	ACSM3	hsa:6296; O60363; Q13732; Q15425; Q53FZ2; Q7KYM6; Q9BUA2	1	0.444	0.291493	80.07	164.5	35.5	38.7	73.76	1
P54840	Glycogen [starch] synthase, liver OS=Homo sapiens OX=9606 GN=GYS2 PE=1 SV=2	0	121.157	28	15	374	14	703	80.9	6.83	751.59	15	GYS2	A0AVD8; hsa:2998; P54840	1	0.493	0.411168	97.48	185.9	14.1	45.39	106.6	1
O75694	Nuclear pore complex protein Nup155 OS=Homo sapiens OX=9606 GN=NUP155 PE=1 SV=1	0	120.953	24	20	213	20	1391	155.1	6.16	278.45	20	NUP155	hsa:9631; O75694; Q9UBE9; Q9UFL5	0	1.69	0.963832	61.92	46.4	153.6	47.05	47.51	1	Met-loss [N-Term]
Q9H2U2	Inorganic pyrophosphatase 2, mitochondrial OS=Homo sapiens OX=9606 GN=PPA2 PE=1 SV=2	0	120.863	34	11	618	10	334	37.9	7.39	1182.8	11	PPA2	B4DLP7; F8WDN9; hsa:27068; I6L9B6; Q4W5E9; Q6PG51; Q8TBW0; Q96E55; Q9H0T0; Q9H2U2; Q9NX37; Q9P033; Q9ULX0	0	0.733	0.8812	56.06	66.7	133.3	58.91	89.62	1
P26196	Probable ATP-dependent RNA helicase DDX6 OS=Homo sapiens OX=9606 GN=DDX6 PE=1 SV=2	0	120.84	47	18	358	18	483	54.4	8.66	611.37	18	DDX6	hsa:1656; P26196; Q5D048	0	1.574	0.972752	83.44	64.8	135.2	38.92	42.91	1
Q13586	Stromal interaction molecule 1 OS=Homo sapiens OX=9606 GN=STIM1 PE=1 SV=3	0	120.607	30	14	238	14	685	77.4	6.67	298.51	14	STIM1	E9PQJ4; hsa:6786; Q13586; Q8N382	0	1.364	0.996073	67.58	86.3	113.7	44.11	64.63	1
P0DMN0	Sulfotransferase 1A4 OS=Homo sapiens OX=9606 GN=SULT1A4 PE=1 SV=1	0	120.551	52	11	452	4	295	34.2	6.01	961.38	11	SULT1A4	B4DNV0; hsa:445329; hsa:6818; O95603; P0DMN0; P50224; Q1ET66; Q6ZWJ5	0	1.93	0.938291	69.76	86.5	113.5	82.63	108.54	1	Acetyl [N-Term]
O75955	Flotillin-1 OS=Homo sapiens OX=9606 GN=FLOT1 PE=1 SV=3	0	120.482	53	18	623	18	427	47.3	7.49	1249.79	18	FLOT1	B4DVY7; hsa:10211; O75955; Q969J8; Q9UHW1; Q9UNV8	0	1.064	0.984689	52.54	78.1	121.9	30.02	40.33	1
Q96RP9	Elongation factor G, mitochondrial OS=Homo sapiens OX=9606 GN=GFM1 PE=1 SV=2	0	120.422	36	20	442	20	751	83.4	7.01	559.42	20	GFM1	A6NCI9; B2RCB9; B3KRW1; hsa:85476; Q6GTN2; Q96RP9; Q96T39	0	1.223	0.998585	62.03	123.9	76.1	20.76	28.43	1
O00629	Importin subunit alpha-3 OS=Homo sapiens OX=9606 GN=KPNA4 PE=1 SV=1	0	120.37	34	10	383	8	521	57.9	4.96	902.52	10	KPNA4	A8K4S6; D3DNM2; hsa:3840; O00190; O00629	2	1.822	0.940848	59.82	82.7	117.3	38.3	29.73	1
Q8IWE2	Protein NOXP20 OS=Homo sapiens OX=9606 GN=FAM114A1 PE=1 SV=2	0	120.343	38	11	256	11	563	60.7	4.68	686.53	11	FAM114A1	A8K9W6; hsa:92689; Q6MZV4; Q8IWE2; Q9BVL6	0	1.278	0.998585	60.9	84.2	115.8	23.06	66.83	1
A5A3E0	POTE ankyrin domain family member F OS=Homo sapiens OX=9606 GN=POTEF PE=1 SV=2	0	120.302	14	11	2774	3	1075	121.4	6.2	6820.71	11	POTEF	A5A3E0; A6NC34; hsa:728378	1	0.778	0.753197	71.54	98.9	101.1	34.64	62.81	1
P53634	Dipeptidyl peptidase 1 OS=Homo sapiens OX=9606 GN=CTSC PE=1 SV=2	0	120.225	36	11	545	11	463	51.8	6.99	1305.49	11	CTSC	A8K7V2; B5MDD5; hsa:1075; P53634; Q2HIY8; Q53G93; Q71E75; Q71E76; Q7M4N9; Q7Z3G7; Q7Z5U7; Q8WY99; Q8WYA7; Q8WYA8	0	1.52	0.978461	82.36	76.8	123.2	34.89	71.74	1
Q9UH99	SUN domain-containing protein 2 OS=Homo sapiens OX=9606 GN=SUN2 PE=1 SV=3	0	120.221	39	15	351	15	717	80.3	6.73	818.48	15	SUN2	B0QY62; hsa:25777; O75156; Q2NKN8; Q2T9F7; Q504T5; Q6B4H1; Q7Z3E3; Q9UH99	0	1.332	0.99383	71.58	81.5	118.5	62.54	73.04	1
Q92947	Glutaryl-CoA dehydrogenase, mitochondrial OS=Homo sapiens OX=9606 GN=GCDH PE=1 SV=1	0	120.184	38	10	393	10	438	48.1	8.06	1118.84	10	GCDH	A8K2Z2; hsa:2639; O14719; Q92947	0	0.407	0.19851	104.62	141.7	58.3	35.74	64.99	1
Q9H6S3	Epidermal growth factor receptor kinase substrate 8-like protein 2 OS=Homo sapiens OX=9606 GN=EPS8L2 PE=1 SV=2	0	120.153	38	16	357	16	715	80.6	6.84	680.76	16	EPS8L2	B3KSX1; B7ZKL3; hsa:64787; Q53GM8; Q8WYW7; Q96K06; Q9H6K9; Q9H6S3	0	1.477	0.988179	68.47	68.6	131.4	38.93	53.65	1
Q9ULD0	2-oxoglutarate dehydrogenase-like, mitochondrial OS=Homo sapiens OX=9606 GN=OGDHL PE=1 SV=3	0	120.016	25	20	495	13	1010	114.4	6.65	855.26	20	OGDHL	A8K2G1; B4DKG2; B4E193; hsa:55753; Q8TAN9; Q9NVA0; Q9ULD0	0	0.309	0.0494994	63.41	180	20	25.33	106.14	1
Q96PC5	Melanoma inhibitory activity protein 2 OS=Homo sapiens OX=9606 GN=MIA2 PE=1 SV=4	0	119.983	20	21	285	16	1412	159.7	4.69	430.3	21	MIA2	A0A193H6U5; A1L4H0; B3KRA6; B4DQS6; D3DSA6; G3XAC5; hsa:4253; O00169; O15320; Q6MZN2; Q6P2R8; Q86TF6; Q8IX92; Q8IX93; Q96PC5; Q9H6C1	5	1.258	0.998585	57.71	93.9	106.1	56.01	60.84	1
Q14847	LIM and SH3 domain protein 1 OS=Homo sapiens OX=9606 GN=LASP1 PE=1 SV=2	0	119.979	56	11	956	11	261	29.7	7.05	2392.24	11	LASP1	B4DGQ0; hsa:3927; Q14847; Q96ED2; Q96IG0	0	1.566	0.975438	81.71	71.6	128.4	35.43	48.97	1
P20742	Pregnancy zone protein OS=Homo sapiens OX=9606 GN=PZP PE=1 SV=4	0	119.908	15	17	675	9	1482	163.8	6.38	1334.24	17	PZP	A6ND27; P20742; Q15273; Q2NKL2; Q7M4N7	0	0.79	0.767733	41.86	120.9	79.1	84.39	29.67	1
P06133	UDP-glucuronosyltransferase 2B4 OS=Homo sapiens OX=9606 GN=UGT2B4 PE=1 SV=2	0	119.874	35	12	753	7	528	60.5	8.51	1315.63	12	UGT2B4	A6NCP7; B4DT75; G5E9X8; hsa:7363; O60731; O60867; O75614; P06133; P36538; Q1HBF9; Q6QQX7	1	0.364	0.119078	107.04	166.5	33.5	37.26	96.34	1
Q10471	Polypeptide N-acetylgalactosaminyltransferase 2 OS=Homo sapiens OX=9606 GN=GALNT2 PE=1 SV=1	0	119.768	34	16	391	15	571	64.7	8.35	560.78	16	GALNT2	A8K1Y3; B7Z8V8; C5HU00; hsa:2590; Q10471; Q9NPY4	0	1.798	0.940848	66.95	51.1	148.9	89.88	74.83	1
Q9BUJ2	Heterogeneous nuclear ribonucleoprotein U-like protein 1 OS=Homo sapiens OX=9606 GN=HNRNPUL1 PE=1 SV=2	0	119.73	27	16	411	15	856	95.7	6.92	814.09	16	HNRNPUL1	B3KMW7; hsa:11100; O76022; Q6ZSZ0; Q7L8P4; Q8N6Z4; Q96G37; Q9BUJ2; Q9HAL3; Q9UG75	0	2.579	0.665764	88.67	49.5	150.5	66.73	66.47	1
P55083	Microfibril-associated glycoprotein 4 OS=Homo sapiens OX=9606 GN=MFAP4 PE=1 SV=2	0	119.675	36	5	335	5	255	28.6	5.63	852.07	5	MFAP4	A8KAJ1; A8MVM2; B4E317; hsa:4239; P55083; Q6P680	0	0.281	0.0271378	100.45	137.4	62.6	38.84	99.7	1
Q9HD40	O-phosphoseryl-tRNA(Sec) selenium transferase OS=Homo sapiens OX=9606 GN=SEPSECS PE=1 SV=2	0	119.594	41	14	149	14	501	55.7	8.05	288.54	14	SEPSECS	A8K8W1; hsa:51091; Q0D2P3; Q17RT1; Q9HD40; Q9NXZ5; Q9UGM9; Q9Y353	0	1.765	0.954646	110.48	84.8	115.2	55.81	82.78	1
P45880	Voltage-dependent anion-selective channel protein 2 OS=Homo sapiens OX=9606 GN=VDAC2 PE=1 SV=2	0	119.417	68	14	852	14	294	31.5	7.56	1815.57	14	VDAC2	hsa:7417; P45880; Q5VWK1; Q5VWK3; Q6IB40; Q7L3J5; Q9BWK8; Q9Y5I6	0	1.728	0.954692	62.63	69	131	16.34	45.46	1	Met-loss+Acetyl [N-Term]
Q7L5Y1	Mitochondrial enolase superfamily member 1 OS=Homo sapiens OX=9606 GN=ENOSF1 PE=1 SV=1	0	119.209	46	15	354	15	443	49.8	6.48	670.82	15	ENOSF1	A6NMP3; A8K9R5; B3KSL6; B3KXE4; D3DUH0; hsa:55556; Q15407; Q15594; Q15595; Q6ZS08; Q7L5Y1; Q9HAS5; Q9HAS6	0	1.359	0.992504	83.3	80.8	119.2	16.5	50.69	1
P05362	Intercellular adhesion molecule 1 OS=Homo sapiens OX=9606 GN=ICAM1 PE=1 SV=2	0	119.151	30	17	487	17	532	57.8	7.99	762.41	17	ICAM1	B2R6M3; hsa:3383; P05362; Q5NKV7; Q96B50	0	1.062	0.984689	99.97	101	99	31.9	101.33	1
P31689	DnaJ homolog subfamily A member 1 OS=Homo sapiens OX=9606 GN=DNAJA1 PE=1 SV=2	0	119.132	50	14	595	14	397	44.8	7.08	1254.4	14	DNAJA1	hsa:3301; P31689; Q5T7Q0; Q86TL9	0	1.783	0.945498	58.96	64.8	135.2	18.16	35.95	1	Met-loss [N-Term]
P18085	ADP-ribosylation factor 4 OS=Homo sapiens OX=9606 GN=ARF4 PE=1 SV=3	0	118.56	58	11	790	6	180	20.5	7.14	1670.23	11	ARF4	B2R7J7; hsa:378; P18085; P21371	0	1.734	0.953398	34.98	70.3	129.7	13.65	26.22	1
Q9UHX1	Poly(U)-binding-splicing factor PUF60 OS=Homo sapiens OX=9606 GN=PUF60 PE=1 SV=1	0	118.521	44	15	465	15	559	59.8	5.29	1059.27	15	PUF60	A8K8K8; hsa:22827; Q969E7; Q96D94; Q96H63; Q99628; Q9NZA0; Q9UHX1; Q9UJY7	0	1.894	0.928829	80.89	77.8	122.2	47.29	36.16	1
P12694	2-oxoisovalerate dehydrogenase subunit alpha, mitochondrial OS=Homo sapiens OX=9606 GN=BCKDHA PE=1 SV=2	0	118.483	37	11	457	11	445	50.4	8.27	1017.27	11	BCKDHA	B4DP47; E7EW46; hsa:593; P12694; Q16034; Q16472	0	0.638	0.752689	91.67	143.4	56.6	23.68	69.31	1
Q96AG4	Leucine-rich repeat-containing protein 59 OS=Homo sapiens OX=9606 GN=LRRC59 PE=1 SV=1	0	118.451	45	12	609	12	307	34.9	9.57	1306.71	12	LRRC59	B2RE83; D3DTX8; hsa:55379; Q96AG4; Q9P189	0	2.029	0.897282	49.67	69	131	17.63	27.47	1
Q7Z2W4	Zinc finger CCCH-type antiviral protein 1 OS=Homo sapiens OX=9606 GN=ZC3HAV1 PE=1 SV=3	0	118.311	30	17	337	17	902	101.4	8.4	548.66	17	ZC3HAV1	A4D1R2; A4D1S4; hsa:56829; Q7Z2W4; Q8IW57; Q8TAJ3; Q96N79; Q9H8R9; Q9P0Y7	0	1.687	0.957664	57.27	91.4	108.6	16.91	33.2	1
P18124	60S ribosomal protein L7 OS=Homo sapiens OX=9606 GN=RPL7 PE=1 SV=1	0	118.18	52	16	659	16	248	29.2	10.65	1155.64	16	RPL7	A8K504; hsa:6129; P18124; Q15289; Q3KQU0; Q5I0X1; Q6IBM9	0	1.549	0.975926	67.64	80.4	119.6	15.68	42.49	1
O95671	Probable bifunctional dTTP/UTP pyrophosphatase/methyltransferase protein OS=Homo sapiens OX=9606 GN=ASMTL PE=1 SV=3	0	117.901	37	14	257	14	621	68.8	6.07	547.18	14	ASMTL	B4DX75; F5GXH4; hsa:8623; J3JS33; O95671; Q5JQ53; Q8NBH5; Q96G02; Q9BUL6	0	1.271	0.998449	67	98.6	101.4	26.03	75.59	1
Q16853	Membrane primary amine oxidase OS=Homo sapiens OX=9606 GN=AOC3 PE=1 SV=3	0	117.891	28	14	270	14	763	84.6	6.52	544.37	14	AOC3	B2RCI5; hsa:8639; K7ESB3; L0L8N9; Q16853; Q45F94	0	0.25	0.0125316	88.52	170.8	29.2	55.95	27.15	1
Q13884	Beta-1-syntrophin OS=Homo sapiens OX=9606 GN=SNTB1 PE=1 SV=3	0	117.88	41	16	279	14	538	58	8.63	481.99	16	SNTB1	A8K9E0; hsa:6641; O14912; Q13884; Q4KMG8	2	1.51	0.978845	59.56	93.6	106.4	25.08	69.29	1
P62826	GTP-binding nuclear protein Ran OS=Homo sapiens OX=9606 GN=RAN PE=1 SV=3	0	117.79	47	12	966	12	216	24.4	7.49	2102.62	12	RAN	A8K3Z8; hsa:5901; P17080; P28746; P28747; P62826; Q6IPB2; Q86V08; Q8NI90; Q9CSP3; Q9CWI7; Q9CZA2; Q9UDJ5; Q9UEU9	0	2.108	0.881137	60.94	67.1	132.9	25.23	24.72	1	Met-loss+Acetyl [N-Term]
P36507	Dual specificity mitogen-activated protein kinase kinase 2 OS=Homo sapiens OX=9606 GN=MAP2K2 PE=1 SV=1	0	117.742	44	13	501	8	400	44.4	6.55	818.64	13	MAP2K2	hsa:5605; P36507	0	1.39	0.990715	64.25	126.1	73.9	28.63	67.6	1
Q9Y262	Eukaryotic translation initiation factor 3 subunit L OS=Homo sapiens OX=9606 GN=EIF3L PE=1 SV=1	0	117.692	31	14	482	14	564	66.7	6.34	855.62	14	EIF3L	B2RDG6; B4DYB2; G8JLH4; hsa:51386; Q53HQ1; Q53HT4; Q5QTR1; Q5TI15; Q6ICD2; Q9Y262	0	1.669	0.962959	60.75	67.8	132.2	23.95	11.67	1	Met-loss+Acetyl [N-Term]
Q7L576	Cytoplasmic FMR1-interacting protein 1 OS=Homo sapiens OX=9606 GN=CYFIP1 PE=1 SV=1	0	117.684	22	21	551	21	1253	145.1	6.9	852.29	21	CYFIP1	A8K6D9; hsa:23191; Q14467; Q5IED0; Q6ZSX1; Q7L576; Q9BSD9; Q9BVC7	0	1.255	0.998585	50.38	85.9	114.1	26.07	25.06	1
P00739	Haptoglobin-related protein OS=Homo sapiens OX=9606 GN=HPR PE=2 SV=2	0	117.658	25	13	776	1	348	39	7.09	1441.66	13	HPR	hsa:3250; P00739; Q7LE20; Q92658; Q92659; Q9ULB0	0	100	2.00326e-16			200		42.83	1
Q13131	5'-AMP-activated protein kinase catalytic subunit alpha-1 OS=Homo sapiens OX=9606 GN=PRKAA1 PE=1 SV=4	0	117.424	39	17	377	16	559	64	8.12	520.17	17	PRKAA1	A8MTQ6; B2R7E1; hsa:5562; O00286; Q13131; Q5D0E1; Q86VS1; Q9UNQ4	1	0.885	0.953398	72.78	108.4	91.6	16.51	70.11	1
P62714	Serine/threonine-protein phosphatase 2A catalytic subunit beta isoform OS=Homo sapiens OX=9606 GN=PPP2CB PE=1 SV=1	0	117.372	50	11	519	9	309	35.6	5.43	1522.43	11	PPP2CB	D3DSV4; hsa:5516; P11082; P62714; Q6FHK5	2	1.908	0.925961	62.57	65.5	134.5	23.04	25.68	1
Q5JTZ9	Alanine--tRNA ligase, mitochondrial OS=Homo sapiens OX=9606 GN=AARS2 PE=1 SV=1	0	117.121	30	18	281	18	985	107.3	6.27	459.63	18	AARS2	A2RRN5; hsa:57505; Q5JTZ9; Q8N198; Q96D02; Q9ULF0	0	1.897	0.928734	79.29	63.1	136.9	15.75	29.93	1
Q13492	Phosphatidylinositol-binding clathrin assembly protein OS=Homo sapiens OX=9606 GN=PICALM PE=1 SV=2	0	116.897	35	14	360	14	652	70.7	7.9	685.27	14	PICALM	B4DTM3; E9PN05; F8VPG7; hsa:8301; O60700; Q13492; Q4LE54; Q6GMQ6; Q86XZ9	0	1.142	0.993027	59.42	150.5	49.5	64.12	106.07	1
Q7Z434	Mitochondrial antiviral-signaling protein OS=Homo sapiens OX=9606 GN=MAVS PE=1 SV=2	0	116.584	42	9	258	9	540	56.5	5.52	480.08	9	MAVS	A8K6X0; B2BD33; B2BD34; F5H6C8; hsa:57506; M1P2Z0; Q2HWT5; Q3I0Y2; Q5T7I6; Q7Z434; Q86VY7; Q9H1H3; Q9H4Y1; Q9H8D3; Q9ULE9	0	1.362	0.99383	67.9	74.7	125.3	26.35	55.36	1
P59998	Actin-related protein 2/3 complex subunit 4 OS=Homo sapiens OX=9606 GN=ARPC4 PE=1 SV=3	0	116.316	63	10	783	10	168	19.7	8.43	1562.77	10	ARPC4	C9JWM7; E7ETI0; F6TTL5; hsa:10093; O15509; P59998; Q6P0W5; Q96QJ3	0	1.262	0.998585	44.03	86.6	113.4	24.77	12.18	1	Met-loss+Acetyl [N-Term]
P62333	26S proteasome regulatory subunit 10B OS=Homo sapiens OX=9606 GN=PSMC6 PE=1 SV=1	0	116.149	47	13	1079	13	389	44.1	7.49	2569	13	PSMC6	B2R975; hsa:5706; P49719; P62333; Q6IBU3; Q92524	0	1.576	0.972752	41.76	71.2	128.8	19.33	15.55	1
O14832	Phytanoyl-CoA dioxygenase, peroxisomal OS=Homo sapiens OX=9606 GN=PHYH PE=1 SV=1	0	115.937	42	14	536	14	338	38.5	8.47	912.86	14	PHYH	A8MTS8; B1ALH5; hsa:5264; O14832	0	0.867	0.945498	81.7	113.9	86.1	32.08	69.6	1
O60784	Target of Myb1 membrane trafficking protein OS=Homo sapiens OX=9606 GN=TOM1 PE=1 SV=2	0	115.73	35	11	406	11	492	53.8	4.7	1087.78	11	TOM1	B4DEL9; B4DNA1; hsa:10043; O60784; Q5TIJ6; Q86X74	0	1.856	0.938291	69.42	75.1	124.9	43.16	42.13	1
P36537	UDP-glucuronosyltransferase 2B10 OS=Homo sapiens OX=9606 GN=UGT2B10 PE=1 SV=1	0	115.719	43	16	583	7	528	60.7	9	972	16	UGT2B10	A8K9M3; B4DPP1; hsa:7365; P36537; Q14CR8	7	0.378	0.142698	102.22	92.9	107.1	42.45	102.99	1
P11177	Pyruvate dehydrogenase E1 component subunit beta, mitochondrial OS=Homo sapiens OX=9606 GN=PDHB PE=1 SV=3	0	115.684	53	13	714	13	359	39.2	6.65	1515.12	13	PDHB	B2R7L0; B4DDD7; hsa:5162; P11177; Q6FH45; Q9BQ27; Q9UFK3	0	1.376	0.992504	82.9	74.8	125.2	29.72	43.34	1
P22570	NADPH:adrenodoxin oxidoreductase, mitochondrial OS=Homo sapiens OX=9606 GN=FDXR PE=1 SV=3	0	115.413	49	18	538	18	491	53.8	8.44	1179	18	FDXR	B4DDI7; B4DHX5; B4DQQ4; B4DX24; B7Z7G2; E7EQC1; hsa:2232; P22570; Q13716; Q4PJI0; Q9BU12	0	0.704	0.852317	71.85	131.5	68.5	27.04	62.87	1
P08134	Rho-related GTP-binding protein RhoC OS=Homo sapiens OX=9606 GN=RHOC PE=1 SV=1	0	115.397	67	11	766	3	193	22	6.58	2062.46	11	RHOC	B3KSW1; hsa:389; P08134; Q6ICN3	0	1.319	0.997591	63.85	83.2	116.8	51.19	37.72	1
P35611	Alpha-adducin OS=Homo sapiens OX=9606 GN=ADD1 PE=1 SV=2	0	115.354	30	16	525	16	737	80.9	5.83	1043.94	16	ADD1	A2A3N8; A2A3P0; B4DI79; D3DVR3; D3DVR4; D3DVR5; hsa:118; P35611; Q13734; Q14729; Q16156; Q86XM2; Q9UJB6	0	1.195	0.996481	81.18	78.5	121.5	51.78	51.02	1
O14617	AP-3 complex subunit delta-1 OS=Homo sapiens OX=9606 GN=AP3D1 PE=1 SV=1	0	115.347	19	18	268	18	1153	130.1	8.48	338.47	18	AP3D1	hsa:8943; O00202; O14617; O75262; Q59HF5; Q96G11; Q9H3C6	0	1.311	0.998585	56.81	87.8	112.2	36.74	40.32	1
Q15166	Serum paraoxonase/lactonase 3 OS=Homo sapiens OX=9606 GN=PON3 PE=1 SV=3	0	114.888	37	10	322	9	354	39.6	5.41	764.68	10	PON3	A4D1H8; hsa:5446; O75855; O76060; Q15166; Q6IRU9; Q8IX97; Q9BZH9	1	0.344	0.0903599	87.93	167	33	32.06	77.1	1
Q9Y266	Nuclear migration protein nudC OS=Homo sapiens OX=9606 GN=NUDC PE=1 SV=1	0	114.872	59	19	590	19	331	38.2	5.38	1112.02	19	NUDC	hsa:10726; Q5QP31; Q5QP35; Q9H0N2; Q9Y266; Q9Y2B6	0	2.389	0.758837	57.26	53.7	146.3	32.83	49.33	1
Q9P0Z9	Peroxisomal sarcosine oxidase OS=Homo sapiens OX=9606 GN=PIPOX PE=1 SV=2	0	114.843	48	13	551	13	390	44	8.41	1249.57	13	PIPOX	B3KNH0; hsa:51268; Q96H28; Q9C070; Q9P0Z9	0	0.481	0.38264	109.94	182.5	17.5	34.91	114.69	1
P09211	Glutathione S-transferase P OS=Homo sapiens OX=9606 GN=GSTP1 PE=1 SV=2	0	114.766	62	9	348	9	210	23.3	5.64	772.95	9	GSTP1	hsa:2950; O00460; P09211; Q15690; Q5TZY3	0	0.452	0.309889	77.76	152.5	47.5	26.28	57.73	1	Met-loss [N-Term]
P08708	40S ribosomal protein S17 OS=Homo sapiens OX=9606 GN=RPS17 PE=1 SV=2	0	114.649	53	9	448	9	135	15.5	9.85	1131.48	9	RPS17	B2R4U4; hsa:6218; P08708; P0CW22	0	1.869	0.936521	67.95	75.4	124.6	26.44	57.03	1
Q13596	Sorting nexin-1 OS=Homo sapiens OX=9606 GN=SNX1 PE=1 SV=3	0	114.625	36	18	687	16	522	59	5.15	1027.89	18	SNX1	A6NM19; A8K6T7; H0Y2M5; hsa:6642; O60750; O60751; Q13596; Q6ZRJ8	2	1.282	0.998039	46.92	80.9	119.1	24.05	34.77	1
P10619	Lysosomal protective protein OS=Homo sapiens OX=9606 GN=CTSA PE=1 SV=2	0	114.6	29	10	397	10	480	54.4	6.61	930.29	10	CTSA	B2R798; hsa:5476; P10619; Q561W6; Q5JZH1; Q96KJ2; Q9BR08; Q9BW68	0	1.977	0.911229	93.37	65.8	134.2	31.45	49.48	1
P54886	Delta-1-pyrroline-5-carboxylate synthase OS=Homo sapiens OX=9606 GN=ALDH18A1 PE=1 SV=2	0	114.571	29	19	354	19	795	87.2	7.12	658.82	19	ALDH18A1	B2R5Q4; B7Z350; B7Z5X8; B7ZLP1; D3DR44; hsa:5832; O95952; P54886; Q3KQU2; Q5T566; Q5T567; Q9UM72	0	1.395	0.990545	77.32	63.9	136.1	46.59	38.88	1
P42025	Beta-centractin OS=Homo sapiens OX=9606 GN=ACTR1B PE=1 SV=1	0	114.433	49	11	587	5	376	42.3	6.4	1201.25	11	ACTR1B	D3DVH2; hsa:10120; P42025; Q53SK5; Q9BRB7	0	1.519	0.984689	67.79	81	119	35.48	54.66	1	Acetyl [N-Term]
P50226	Sulfotransferase 1A2 OS=Homo sapiens OX=9606 GN=SULT1A2 PE=1 SV=2	0	114.432	52	13	795	4	295	34.3	7.97	2016.79	13	SULT1A2	A9QY25; hsa:6799; P50226; P78393; Q14CJ7	0	0.441	0.0545491	58.42	146.7	53.3	27.27	51.16	1
Q9Y277	Voltage-dependent anion-selective channel protein 3 OS=Homo sapiens OX=9606 GN=VDAC3 PE=1 SV=1	0	114.299	49	13	1000	12	283	30.6	8.66	1857.2	13	VDAC3	hsa:7419; Q9UIS0; Q9Y277	0	1.702	0.957629	61.93	67	133	27.28	32.37	1	Met-loss+Acetyl [N-Term]
Q99541	Perilipin-2 OS=Homo sapiens OX=9606 GN=PLIN2 PE=1 SV=2	0	114.225	48	14	663	14	437	48	6.8	1332.59	14	PLIN2	hsa:123; Q99541; Q9BSC3	0	2.852	0.532368	90.56	36	164	54.81	62.54	1	Met-loss+Acetyl [N-Term]
Q15274	Nicotinate-nucleotide pyrophosphorylase [carboxylating] OS=Homo sapiens OX=9606 GN=QPRT PE=1 SV=3	0	113.942	44	7	276	7	297	30.8	6.21	746.53	7	QPRT	hsa:23475; Q15274; Q53XW7; Q96G22; Q9BSG6	0	1.003	0.975926	105.38	114.6	85.4	37.01	66.23	1
Q16775	Hydroxyacylglutathione hydrolase, mitochondrial OS=Homo sapiens OX=9606 GN=HAGH PE=1 SV=2	0	113.878	56	10	469	10	308	33.8	8.12	1186.84	10	HAGH	A8K290; B4DP33; B4DRA7; E7EN93; hsa:3029; Q16775	0	0.57	0.607699	69.99	129	71	38.64	52.08	1
P61221	ATP-binding cassette sub-family E member 1 OS=Homo sapiens OX=9606 GN=ABCE1 PE=1 SV=1	0	113.551	24	10	474	10	599	67.3	8.34	687.01	10	ABCE1	hsa:6059; O88793; P61221; Q13181; Q13864; Q6NR76; Q96AL0; Q96B10; Q99K66	0	1.619	0.971427	51.63	74.1	125.9	13.25	36.08	1
Q96HC4	PDZ and LIM domain protein 5 OS=Homo sapiens OX=9606 GN=PDLIM5 PE=1 SV=5	0	113.394	32	13	535	13	596	63.9	8.21	1285.26	13	PDLIM5	A8K6F9; D6RB78; E9PBF5; hsa:10611; O60705; Q56VN4; Q5UW38; Q8WVK0; Q96HC4	0	0.605	0.680957	52.03	125.6	74.4	15.11	35.64	1
O14756	17-beta-hydroxysteroid dehydrogenase type 6 OS=Homo sapiens OX=9606 GN=HSD17B6 PE=1 SV=1	0	113.163	54	15	634	11	317	35.9	8.73	1523.06	15	HSD17B6	hsa:8630; O14756; O43275	0	0.202	0.00256538	108.32	191.1	8.9	45.88	121.54	1
Q08J23	RNA cytosine C(5)-methyltransferase NSUN2 OS=Homo sapiens OX=9606 GN=NSUN2 PE=1 SV=2	0	113.158	40	22	253	22	767	86.4	6.77	368.98	22	NSUN2	A8K529; B2RNR4; B3KP09; B4DQW2; G3V1R4; hsa:54888; Q08J23; Q9BVN4; Q9H858; Q9NXD9	0	1.554	0.975926	97.22	139	61	80.6	221.42	1
Q12905	Interleukin enhancer-binding factor 2 OS=Homo sapiens OX=9606 GN=ILF2 PE=1 SV=2	0	113.107	45	13	940	13	390	43	5.26	1634.52	13	ILF2	A6NDB0; B2R8G7; hsa:3608; Q12905; Q5SR10; Q5SR11; Q7L7R3; Q9BWD4; Q9P1N0	0	2.149	0.86941	61.07	48.8	151.2	54.24	33.36	1
O00391	Sulfhydryl oxidase 1 OS=Homo sapiens OX=9606 GN=QSOX1 PE=1 SV=3	0	112.955	29	18	200	18	747	82.5	8.92	339.94	18	QSOX1	hsa:5768; O00391; Q59G29; Q5T2X0; Q8TDL6; Q8WVP4	0	1.418	0.992504	82.84	58	142	94.89	122.76	1
O94760	N(G),N(G)-dimethylarginine dimethylaminohydrolase 1 OS=Homo sapiens OX=9606 GN=DDAH1 PE=1 SV=3	0	112.933	65	15	577	15	285	31.1	5.81	1448.17	15	DDAH1	hsa:23576; O94760; Q5HYC8; Q86XK5	0	0.886	0.953398	76.65	109.9	90.1	31.36	31.22	1	Met-loss+Acetyl [N-Term]
P32969	60S ribosomal protein L9 OS=Homo sapiens OX=9606 GN=RPL9P9 PE=1 SV=1	0	112.905	53	9	591	9	192	21.9	9.95	1568.91	9	RPL9; RPL9P7; RPL9P8; RPL9P9	hsa:6133; P32969	0	1.887	0.931204	59.05	71.3	128.7	7.55	44.75	1
P43487	Ran-specific GTPase-activating protein OS=Homo sapiens OX=9606 GN=RANBP1 PE=1 SV=1	0	112.892	54	6	342	6	201	23.3	5.29	914.42	6	RANBP1	hsa:5902; P43487; Q53EY3	0	2.501	0.703255	88.5	54.6	145.4	26.17	63.98	1
P30519	Heme oxygenase 2 OS=Homo sapiens OX=9606 GN=HMOX2 PE=1 SV=2	0	112.718	46	10	260	10	316	36	5.41	504.96	10	HMOX2	A8MT35; D3DUD5; hsa:3163; I3L430; O60605; P30519	0	1.158	0.99383	81.97	83.8	116.2	39.35	53.8	1
Q96T51	RUN and FYVE domain-containing protein 1 OS=Homo sapiens OX=9606 GN=RUFY1 PE=1 SV=2	0	112.697	31	18	313	17	708	79.8	5.74	525.04	18	RUFY1	hsa:80230; Q59FF3; Q71S93; Q96T51; Q9H6I3	1	1.768	0.945942	54.11	56	144	41.72	36.79	1
P36222	Chitinase-3-like protein 1 OS=Homo sapiens OX=9606 GN=CHI3L1 PE=1 SV=2	0	112.581	54	15	234	15	383	42.6	8.46	532.79	15	CHI3L1	B2R7B0; hsa:1116; P30923; P36222; Q8IVA4; Q96HI7	0	2.433	0.725194	106.31	67.6	132.4	40.46	135.06	1
Q15417	Calponin-3 OS=Homo sapiens OX=9606 GN=CNN3 PE=1 SV=1	0	112.568	60	12	351	11	329	36.4	6.05	685.67	12	CNN3	B4DFK6; B4DP09; F8WA86; hsa:1266; Q15417; Q6FHA7	1	0.968	0.972752	68.05	119.4	80.6	18.87	35.61	1
A6NIZ1	Ras-related protein Rap-1b-like protein OS=Homo sapiens OX=9606 PE=2 SV=1	0	112.507	61	11	644	1	184	20.9	5.48	1381.14	11	RAP1BL	A6NIZ1	0								1
Q9BQG0	Myb-binding protein 1A OS=Homo sapiens OX=9606 GN=MYBBP1A PE=1 SV=2	0	112.39	18	21	121	21	1328	148.8	9.28	152.28	21	MYBBP1A	hsa:10514; Q86VM3; Q9BQG0; Q9BW49; Q9P0V5; Q9UF99	0	1.722	0.963805	60.09	32.4	167.6	80.82	68.89	1
P02649	Apolipoprotein E OS=Homo sapiens OX=9606 GN=APOE PE=1 SV=1	0	112.274	48	17	965	17	317	36.1	5.73	2207.62	17	APOE	B2RC15; C0JYY5; hsa:348; P02649; Q9P2S4	0	2.154	0.869013	82.47	60.9	139.1	38.02	56.82	1
P41218	Myeloid cell nuclear differentiation antigen OS=Homo sapiens OX=9606 GN=MNDA PE=1 SV=1	0	112.227	55	19	154	19	407	45.8	9.76	184.62	19	MNDA	hsa:4332; P41218	0	0.854	0.940848	96.12	151.6	48.4	26	87.35	1
Q15437	Protein transport protein Sec23B OS=Homo sapiens OX=9606 GN=SEC23B PE=1 SV=2	0	111.937	29	15	451	13	767	86.4	6.89	889.31	15	SEC23B	D3DW33; hsa:10483; Q15437; Q503A9; Q5W183; Q9BS15; Q9BSI2; Q9H1D7	0	1.498	0.984689	67.26	63.6	136.4	61.23	42.59	1
P29590	Protein PML OS=Homo sapiens OX=9606 GN=PML PE=1 SV=3	0	111.931	34	22	324	22	882	97.5	6.21	467.13	22	PML	E9PBR7; hsa:5371; P29590; P29591; P29592; P29593; Q00755; Q15959; Q59FP9; Q8WUA0; Q96S41; Q9BPW2; Q9BWP7; Q9BZX6; Q9BZX7; Q9BZX8; Q9BZX9; Q9BZY0; Q9BZY2; Q9BZY3	0	1.221	0.998585	54.17	86.5	113.5	25.98	24.81	1
Q9Y6C9	Mitochondrial carrier homolog 2 OS=Homo sapiens OX=9606 GN=MTCH2 PE=1 SV=1	0	111.913	44	11	482	11	303	33.3	7.97	1354.96	11	MTCH2	B2R7L8; hsa:23788; Q9Y6C9	0	1.037	0.981307	52.76	97.1	102.9	13.46	46.87	1
P16083	Ribosyldihydronicotinamide dehydrogenase [quinone] OS=Homo sapiens OX=9606 GN=NQO2 PE=1 SV=5	0	111.911	39	10	229	10	231	25.9	6.29	612.75	10	NQO2	B2R492; hsa:4835; P16083; Q5TD04	0	0.765	0.902141	90.32	136.2	63.8	47.12	71.5	1
P54578	Ubiquitin carboxyl-terminal hydrolase 14 OS=Homo sapiens OX=9606 GN=USP14 PE=1 SV=3	0	111.853	43	13	653	13	494	56	5.3	1684.6	13	USP14	B7Z4N8; hsa:9097; J3QRZ5; P54578; Q53XY5	0	1.899	0.928554	43.97	65.8	134.2	22.84	21.06	1
Q58FF8	Putative heat shock protein HSP 90-beta 2 OS=Homo sapiens OX=9606 GN=HSP90AB2P PE=1 SV=2	0	111.841	24	13	1602	1	381	44.3	4.84	3648.32	13	HSP90AB2P	Q58FF8	0	1.128	0.992504	73.7	83.9	116.1	57.79	41.35	1
Q9H7Z7	Prostaglandin E synthase 2 OS=Homo sapiens OX=9606 GN=PTGES2 PE=1 SV=1	0	111.794	40	10	327	10	377	41.9	9.16	733.59	10	PTGES2	hsa:80142; Q53EW9; Q5SYV6; Q96GI0; Q96GL2; Q9H7Z7	0	1.961	0.913623	65.73	65.8	134.2	34.64	54.13	1
P43304	Glycerol-3-phosphate dehydrogenase, mitochondrial OS=Homo sapiens OX=9606 GN=GPD2 PE=1 SV=3	0	111.757	37	20	219	20	727	80.8	7.69	311.85	20	GPD2	A8K4V0; B3KSA9; hsa:2820; P43304; Q59FR1; Q9HAP9	0	1.517	0.978461	69.06	80	120	17.73	27.35	1
P23588	Eukaryotic translation initiation factor 4B OS=Homo sapiens OX=9606 GN=EIF4B PE=1 SV=2	0	111.745	18	7	345	7	611	69.1	5.73	879.76	7	EIF4B	B4DS13; hsa:1975; P23588; Q4G0E3; Q53HQ2; Q6GPH5; Q6IB46; Q8WYK5	0	2.359	0.767733	72.54	47.5	152.5	30.34	50.69	1
Q13438	Protein OS-9 OS=Homo sapiens OX=9606 GN=OS9 PE=1 SV=1	0	111.717	38	15	238	15	667	75.5	4.87	379.79	15	OS9	A6NDD1; A6NFR7; A6NLB2; A8K5Q9; B4DE28; B4DPX1; B4E1I6; E7ENT8; E7EW91; F8VUH2; G3XA88; hsa:10956; O00579; Q13438; Q6IBL2; Q8IZ58; Q9BW99	0	1.624	0.968009	60.7	96	104	30.55	31.46	1
P12235	ADP/ATP translocase 1 OS=Homo sapiens OX=9606 GN=SLC25A4 PE=1 SV=4	0	111.621	49	15	841	6	298	33	9.76	1700.33	15	SLC25A4	D3DP59; hsa:291; P12235	0	0.554	0.567306	65.68	133.7	66.3	15.36	66.36	1	Met-loss+Acetyl [N-Term]
P48681	Nestin OS=Homo sapiens OX=9606 GN=NES PE=1 SV=2	0	111.55	20	24	247	24	1621	177.3	4.36	406.57	24	NES	hsa:10763; O00552; P48681; Q3LIF5; Q5SYZ6	0	0.771	0.910863	87.67	154.2	45.8	23.97	59.69	1
P52758	2-iminobutanoate/2-iminopropanoate deaminase OS=Homo sapiens OX=9606 GN=RIDA PE=1 SV=1	0	111.549	91	11	1019	11	137	14.5	8.68	2262.84	11	RIDA	hsa:10247; P52758; Q6FHU9; Q6IBG0	0	0.249	0.0121183	101.29	175.1	24.9	43.91	58.96	1
Q13510	Acid ceramidase OS=Homo sapiens OX=9606 GN=ASAH1 PE=1 SV=5	0	111.473	54	17	540	17	395	44.6	7.62	1037.77	17	ASAH1	E9PDS0; hsa:427; Q13510; Q6W898; Q96AS2	0	0.906	0.957664	79.4	122.8	77.2	39.67	52.59	1
P43155	Carnitine O-acetyltransferase OS=Homo sapiens OX=9606 GN=CRAT PE=1 SV=5	0	111.176	31	16	672	16	626	70.8	8.44	1316.54	16	CRAT	P43155; Q5T952; Q9BW16	0	0.841	0.940848	68.99	111.8	88.2	22.78	76.62	1
Q9H0D6	5'-3' exoribonuclease 2 OS=Homo sapiens OX=9606 GN=XRN2 PE=1 SV=1	0	111.133	25	14	251	14	950	108.5	7.47	356.94	14	XRN2	hsa:22803; Q3L8N4; Q6KGZ9; Q9BQL1; Q9H0D6; Q9NTW0; Q9NXS6; Q9UL53	0	2.046	0.896853	66.53	64.1	135.9	51.73	28.44	1
P14735	Insulin-degrading enzyme OS=Homo sapiens OX=9606 GN=IDE PE=1 SV=4	0	111.129	33	21	194	21	1019	117.9	6.61	133.44	21	IDE	B2R721; B7ZAU2; D3DR35; hsa:3416; P14735; Q5T5N2	0	1.376	0.998449	50.23	59.7	140.3	58.94	45.85	1
P42285	Exosome RNA helicase MTR4 OS=Homo sapiens OX=9606 GN=MTREX PE=1 SV=3	0	111.052	27	17	296	17	1042	117.7	6.52	415.14	17	MTREX	hsa:23517; P42285; Q2M386; Q6MZZ8; Q6P170; Q8N5R0; Q8TAG2	0	1.982	0.910953	58.12	44.2	155.8	42.05	39.71	1
P35908	Keratin, type II cytoskeletal 2 epidermal OS=Homo sapiens OX=9606 GN=KRT2 PE=1 SV=2	0	111.051	46	21	412	15	639	65.4	8	661.5	21	KRT2	hsa:3849; P35908; Q4VAQ2	3	1.38	0.992504	59.37	75.9	124.1	38.31	65.4	1
O76031	ATP-dependent Clp protease ATP-binding subunit clpX-like, mitochondrial OS=Homo sapiens OX=9606 GN=CLPX PE=1 SV=2	0	111.025	36	16	531	16	633	69.2	7.58	637.16	16	CLPX	A1L428; A8K8F1; B9EGI8; hsa:10845; O76031; Q9H4D9	0	1.895	0.928829	51.21	64.5	135.5	21.37	40.4	1
P31943	Heterogeneous nuclear ribonucleoprotein H OS=Homo sapiens OX=9606 GN=HNRNPH1 PE=1 SV=4	0	110.978	38	12	648	7	449	49.2	6.3	1007.47	12	HNRNPH1	B3KW86; D3DWQ2; hsa:3187; P31943; Q6IBM4	6	1.913	0.925961	60.7	61.3	138.7	40.86	21.46	1	Met-loss [N-Term]
Q8NBS9	Thioredoxin domain-containing protein 5 OS=Homo sapiens OX=9606 GN=TXNDC5 PE=1 SV=2	0	110.909	44	15	1230	15	432	47.6	5.97	2415.8	15	TXNDC5	B2RDM2; hsa:81567; Q5TCQ0; Q8NBS9; Q8ND33; Q8TCT2; Q9BVH9	0	1.1	0.9904	58.2	103.3	96.7	17.18	52.88	1
O95486	Protein transport protein Sec24A OS=Homo sapiens OX=9606 GN=SEC24A PE=1 SV=2	0	110.782	17	13	282	13	1093	119.7	7.66	487.66	13	SEC24A	A8MVW3; hsa:10802; O95486; Q8WUV2; Q96GP7	0	1.587	0.975926	46.67	68.9	131.1	18.92	39.24	1
P40123	Adenylyl cyclase-associated protein 2 OS=Homo sapiens OX=9606 GN=CAP2 PE=1 SV=1	0	110.7	44	13	413	13	477	52.8	6.37	835.73	13	CAP2	B2R5Y3; B7Z1C4; B7Z214; hsa:10486; P40123; Q6IAY2	0	2.207	0.846055	86.38	70.8	129.2	36.23	64.47	1	Met-loss+Acetyl [N-Term]
Q9UF12	Hydroxyproline dehydrogenase OS=Homo sapiens OX=9606 GN=PRODH2 PE=1 SV=1	0	110.501	34	10	214	10	536	58.8	8.6	597	10	PRODH2	hsa:58510; Q9UF12	0	1.669	0.972713	102.91	150.2	49.8	52.1	109.01	1
P51812	Ribosomal protein S6 kinase alpha-3 OS=Homo sapiens OX=9606 GN=RPS6KA3 PE=1 SV=1	0	110.416	27	15	442	12	740	83.7	6.89	649.91	15	RPS6KA3	B2R9V4; hsa:6197; P51812; Q4VAP3; Q59H26; Q5JPK8; Q7Z3Z7	4	1.733	0.953398	78.89	63.5	136.5	53.87	54.63	1	Met-loss [N-Term]
O75191	Xylulose kinase OS=Homo sapiens OX=9606 GN=XYLB PE=1 SV=3	0	110.384	48	15	524	15	536	58.3	5.86	1165.47	15	XYLB	B2RAW4; B4DDT2; B9EH64; hsa:9942; O75191	0	0.993	0.975926	90.48	107.3	92.7	51.87	100.58	1
Q12955	Ankyrin-3 OS=Homo sapiens OX=9606 GN=ANK3 PE=1 SV=3	0	110.116	6	18	192	15	4377	480.1	6.49	272.11	18	ANK3	B1AQT2; B4DIL1; E9PE32; hsa:288; Q12955; Q13484; Q5CZH9; Q5VXD5; Q7Z3G4; Q9H0P5	3	0.773	0.910953	70.24	112.9	87.1	19.54	54.75	1
P30838	Aldehyde dehydrogenase, dimeric NADP-preferring OS=Homo sapiens OX=9606 GN=ALDH3A1 PE=1 SV=3	0	109.919	42	13	100	12	453	50.4	6.54	225.89	13	ALDH3A1	A8K828; hsa:218; P30838; Q9BT37	0	1.314	0.995993	82.99	97	103	41.8	192.37	1
P17980	26S proteasome regulatory subunit 6A OS=Homo sapiens OX=9606 GN=PSMC3 PE=1 SV=3	0	109.744	43	16	862	16	439	49.2	5.24	1494.86	16	PSMC3	B2R8V1; hsa:5702; P17980; Q3B757; Q3B865; Q53HU5; Q6GPG8; Q6IBS1; Q96HD3	0	1.584	0.972752	40.22	70.3	129.7	21.82	20.25	1	Acetyl [N-Term]
Q8TEM1	Nuclear pore membrane glycoprotein 210 OS=Homo sapiens OX=9606 GN=NUP210 PE=1 SV=3	0	109.515	13	17	227	17	1887	205	6.81	317.87	17	NUP210	A6NN56; hsa:23225; O94980; Q6NXG6; Q8NBJ1; Q8TEM1; Q9H6C8; Q9UFP3	0	1.719	0.956013	54	72.9	127.1	21.92	50.74	1
Q9Y2X3	Nucleolar protein 58 OS=Homo sapiens OX=9606 GN=NOP58 PE=1 SV=1	0	109.482	37	15	455	15	529	59.5	8.92	918.66	15	NOP58	hsa:51602; Q53SA4; Q6PK08; Q9P036; Q9UFN3; Q9Y2X3	0	2.384	0.759802	59.69	46.5	153.5	37.85	43.67	1
P51665	26S proteasome non-ATPase regulatory subunit 7 OS=Homo sapiens OX=9606 GN=PSMD7 PE=1 SV=2	0	109.477	43	10	495	10	324	37	6.77	1206.44	10	PSMD7	D3DWS9; hsa:5713; P51665; Q6PKI2; Q96E97	0	1.652	0.964343	44.43	67.5	132.5	17.34	28.58	1
P46777	60S ribosomal protein L5 OS=Homo sapiens OX=9606 GN=RPL5 PE=1 SV=3	0	109.363	40	12	587	12	297	34.3	9.72	1060.23	12	RPL5	hsa:6125; P46777; Q32LZ3; Q53HH6; Q9H3F4	0	1.72	0.956013	67	74.5	125.5	22.56	43.98	1
Q9H9B4	Sideroflexin-1 OS=Homo sapiens OX=9606 GN=SFXN1 PE=1 SV=4	0	109.227	57	13	927	11	322	35.6	9.07	1870.09	13	SFXN1	B3KPW3; D3DQN2; hsa:94081; Q9H9B4; Q9HA53	2	0.862	0.945498	73.17	106	94	15.26	53.62	1	Met-loss+Acetyl [N-Term]
P08240	Signal recognition particle receptor subunit alpha OS=Homo sapiens OX=9606 GN=SRPRA PE=1 SV=2	0	109.197	35	15	360	15	638	69.8	8.95	755.44	15	SRPRA	A6NIB3; B2R5Z8; B4E0H3; E9PJS4; hsa:6734; P08240; Q9BVJ4	0	1.018	0.978845	63.84	83.8	116.2	15.95	32.02	1
Q8IUX7	Adipocyte enhancer-binding protein 1 OS=Homo sapiens OX=9606 GN=AEBP1 PE=1 SV=1	0	109.18	17	15	364	15	1158	130.8	5.11	716.75	15	AEBP1	hsa:165; Q14113; Q59ER7; Q6ZSC7; Q7KZ79; Q8IUX7	0	1.111	0.992504	97.29	123.6	76.4	55.58	82.74	1
P30085	UMP-CMP kinase OS=Homo sapiens OX=9606 GN=CMPK1 PE=1 SV=3	0	109.124	57	13	722	13	196	22.2	5.57	1754.91	13	CMPK1	B2R6S5; B4DPU7; E9PGI8; hsa:51727; P30085; Q53GB7; Q5SVZ0; Q96C07; Q9UBQ8; Q9UIA2	0	1.15	0.99383	56.33	97.6	102.4	22.59	42.54	1
Q9Y2H6	Fibronectin type-III domain-containing protein 3A OS=Homo sapiens OX=9606 GN=FNDC3A PE=1 SV=4	0	109.101	21	14	230	14	1198	131.8	6.71	315.13	14	FNDC3A	B4DYG1; hsa:22862; Q5HYC9; Q5JVF8; Q5JVF9; Q6EVH3; Q6EVH4; Q6N020; Q6P9D5; Q6ZME4; Q9H1W1; Q9Y2H6	0	1.084	0.975926	69.77	98	102	29.37	53.61	1
Q99623	Prohibitin-2 OS=Homo sapiens OX=9606 GN=PHB2 PE=1 SV=2	0	108.971	60	16	1045	16	299	33.3	9.83	2136.19	16	PHB2	B4DP75; hsa:11331; Q2YDA4; Q7KYU3; Q92978; Q99623	0	1.555	0.975926	51.75	79.7	120.3	20.03	25.36	1
P51610	Host cell factor 1 OS=Homo sapiens OX=9606 GN=HCFC1 PE=1 SV=2	0	108.832	13	16	387	16	2035	208.6	7.46	611.26	16	HCFC1	hsa:3054; P51610; Q6P4G5	0	1.82	0.940848	71.43	115.9	84.1	19.43	86.06	1
O00505	Importin subunit alpha-4 OS=Homo sapiens OX=9606 GN=KPNA3 PE=1 SV=2	0	108.768	33	9	302	7	521	57.8	4.94	632.19	9	KPNA3	hsa:3839; O00191; O00505; O43195; Q5JVM9; Q8IYQ9; Q96AA7	0	1.432	0.99383	58.87	72.1	127.9	39.87	35.34	1	Met-loss+Acetyl [N-Term]
Q86UE4	Protein LYRIC OS=Homo sapiens OX=9606 GN=MTDH PE=1 SV=2	0	108.674	41	17	535	17	582	63.8	9.32	1026.22	17	MTDH	hsa:92140; Q05DH2; Q52QU9; Q6PK07; Q86UE4; Q8TCX3	0	1.518	0.978461	78.2	77.2	122.8	31.98	115.11	1
Q8NI60	Atypical kinase COQ8A, mitochondrial OS=Homo sapiens OX=9606 GN=COQ8A PE=1 SV=1	0	108.45	35	15	418	15	647	71.9	6.99	704.68	15	COQ8A	hsa:56997; Q5T7A5; Q63HK0; Q8NCJ6; Q8NI60; Q9HBQ1; Q9NQ67	0	1.717	0.956013	70.97	66.2	133.8	18.65	80.01	1
Q8N139	ATP-binding cassette sub-family A member 6 OS=Homo sapiens OX=9606 GN=ABCA6 PE=1 SV=2	0	108.398	16	15	255	15	1617	184.2	7.36	359.68	15	ABCA6	hsa:23460; Q6NSH9; Q8N139; Q8N856; Q8WWZ6	0	1.553	0.975926	66.94	123.2	76.8	27.03	76.73	1
P58546	Myotrophin OS=Homo sapiens OX=9606 GN=MTPN PE=1 SV=2	0	108.356	86	7	443	7	118	12.9	5.52	1301.61	7	MTPN	hsa:136319; P58546	0	1.392	0.990707	61.08	90.9	109.1	21.7	34.69	1	Met-loss+Acetyl [N-Term]
P41091	Eukaryotic translation initiation factor 2 subunit 3 OS=Homo sapiens OX=9606 GN=EIF2S3 PE=1 SV=3	0	108.251	35	12	469	12	472	51.1	8.4	981.35	12	EIF2S3	A0A024RBY4; A8K2Y2; B2R5N2; B5BTZ4; hsa:1968; P41091; Q53HK3	0	2.119	0.878496	43.08	57.8	142.2	29.09	19.11	1	Met-loss [N-Term]
P29966	Myristoylated alanine-rich C-kinase substrate OS=Homo sapiens OX=9606 GN=MARCKS PE=1 SV=4	0	108.233	40	8	347	8	332	31.5	4.45	1175.53	8	MARCKS	E1P560; hsa:4082; P29966; Q2LA83; Q5TDB7	0	1.801	0.940848	72.03	50.5	149.5	75.21	46.82	1
P62495	Eukaryotic peptide chain release factor subunit 1 OS=Homo sapiens OX=9606 GN=ETF1 PE=1 SV=3	0	108.194	37	14	450	14	437	49	5.71	632.75	14	ETF1	B2R6B4; D3DQC1; hsa:2107; P46055; P62495; Q5M7Z7; Q96CG1	0	1.982	0.910953	52.97	60	140	20.68	53.6	1	Met-loss+Acetyl [N-Term]
Q99959	Plakophilin-2 OS=Homo sapiens OX=9606 GN=PKP2 PE=1 SV=2	0	108.017	28	15	340	15	881	97.4	9.33	534.88	15	PKP2	A0AV37; B8QFA1; B8QGS6; B8QGS7; D3DUW9; hsa:5318; Q4VC01; Q99959; Q99960	0	1.383	0.992504	69.41	81.5	118.5	18.91	46.9	1	Met-loss+Acetyl [N-Term]
P68431	Histone H3.1 OS=Homo sapiens OX=9606 GN=H3C12 PE=1 SV=2	0	107.879	61	12	682	1	136	15.4	11.12	1361.91	12	H3C1; H3C10; H3C11; H3C12; H3C2; H3C3; H3C4; H3C6; H3C7; H3C8	A0PJT7; A5PLR1; hsa:8350; hsa:8351; hsa:8352; hsa:8353; hsa:8354; hsa:8355; hsa:8356; hsa:8357; hsa:8358; hsa:8968; P02295; P02296; P16106; P68431; Q6ISV8; Q6NWP8; Q6NWP9; Q6NXU4; Q71DJ3; Q93081	11	2.045	0.896698	102.25	71.5	128.5	17.56	54.87	1
O96008	Mitochondrial import receptor subunit TOM40 homolog OS=Homo sapiens OX=9606 GN=TOMM40 PE=1 SV=1	0	107.81	43	9	329	9	361	37.9	7.25	660.85	9	TOMM40	A0A024R0P9; hsa:10452; O96008; Q86VW4; Q8WY09; Q8WY10; Q8WY11; Q9BR95	0	2.168	0.86941	69.77	64.4	135.6	22.39	43.72	1
P62191	26S proteasome regulatory subunit 4 OS=Homo sapiens OX=9606 GN=PSMC1 PE=1 SV=1	0	107.795	42	15	865	14	440	49.2	6.21	1762.26	15	PSMC1	B4DR63; hsa:5700; P49014; P62191; Q03527; Q6IAW0; Q6NW36; Q96AZ3	0	1.616	0.969498	60.73	68.9	131.1	16.39	25.91	1
Q8WVM8	Sec1 family domain-containing protein 1 OS=Homo sapiens OX=9606 GN=SCFD1 PE=1 SV=4	0	107.651	37	14	408	14	642	72.3	6.27	874.84	14	SCFD1	A8K2Z5; B7Z4U7; B7Z594; hsa:23256; O60754; O94990; Q7Z529; Q8WVM8; Q9BZI3; Q9UNL3; Q9Y6A8	0	1.32	0.99383	57.59	145.1	54.9	30.24	37.9	1
P49589	Cysteine--tRNA ligase, cytoplasmic OS=Homo sapiens OX=9606 GN=CARS1 PE=1 SV=3	0	107.62	33	19	259	19	748	85.4	6.76	307.51	19	CARS1	hsa:833; P49589; Q53XI8; Q5HYE4; Q9HD24; Q9HD25	0	1.232	0.998689	55.63	108.1	91.9	25.84	24.15	1
P31153	S-adenosylmethionine synthase isoform type-2 OS=Homo sapiens OX=9606 GN=MAT2A PE=1 SV=1	0	107.562	41	13	758	11	395	43.6	6.48	1325.13	13	MAT2A	A8K511; B4DN45; D6W5L1; hsa:4144; P31153; Q53SP5	0	1.49	0.980663	64.57	75	125	21.97	50.55	1
O00499	Myc box-dependent-interacting protein 1 OS=Homo sapiens OX=9606 GN=BIN1 PE=1 SV=1	0	107.554	28	12	333	12	593	64.7	5.06	730.36	12	BIN1	hsa:274; O00297; O00499; O00545; O43867; O60552; O60553; O60554; O60555; O75514; O75515; O75516; O75517; O75518; Q659B7; Q92944; Q99688	0	1.274	0.998449	82.66	114.4	85.6	26.37	48.13	1
P43034	Platelet-activating factor acetylhydrolase IB subunit beta OS=Homo sapiens OX=9606 GN=PAFAH1B1 PE=1 SV=2	0	107.528	52	16	464	15	410	46.6	7.37	720.62	16	PAFAH1B1	B2R7Q7; hsa:5048; P43034; Q8WZ88; Q8WZ89	1	1.219	0.998585	50.3	88.8	111.2	18.17	27.77	1
O43491	Band 4.1-like protein 2 OS=Homo sapiens OX=9606 GN=EPB41L2 PE=1 SV=1	0	107.406	21	17	391	14	1005	112.5	5.44	533.49	17	EPB41L2	B4DHI8; E9PPD9; hsa:2037; O43491; Q5T4F0; Q68DV2	3	0.97	0.972752	70.22	81.4	118.6	33.09	49.62	1
Q14141	Septin-6 OS=Homo sapiens OX=9606 GN=SEPTIN6 PE=1 SV=4	0	107.388	34	13	412	5	434	49.7	6.67	873.35	13	SEPTIN6	hsa:23157; Q14141; Q5JTK0; Q969W5; Q96A13; Q96GR1; Q96P86; Q96P87	0	1.053	0.964926	64.67	102.6	97.4	40.24	78.66	1
O60841	Eukaryotic translation initiation factor 5B OS=Homo sapiens OX=9606 GN=EIF5B PE=1 SV=4	0	107.277	17	11	319	11	1220	138.7	5.49	501.71	11	EIF5B	hsa:9669; O60841; O95805; Q53RV7; Q53SI8; Q9UF81; Q9UMN7	0	2.675	0.550345	62.5	29.8	170.2	71.63	44.63	1
Q15424	Scaffold attachment factor B1 OS=Homo sapiens OX=9606 GN=SAFB PE=1 SV=4	0	107.137	17	12	501	5	915	102.6	5.47	1085.82	12	SAFB	A0AV56; B7Z5B6; B7ZLP6; F5H0H3; hsa:6294; O60406; Q15424; Q59HH8	8	2.343	0.776183	60.76	49.6	150.4	52.92	36.74	1
Q86XP3	ATP-dependent RNA helicase DDX42 OS=Homo sapiens OX=9606 GN=DDX42 PE=1 SV=1	0	107.053	27	15	244	15	938	102.9	7.02	363.89	15	DDX42	A6NML1; A8KA43; hsa:11325; O75619; Q68G51; Q86XP3; Q96BK1; Q96HR7; Q9Y3V8	0	1.904	0.928554	59.45	53.8	146.2	30.39	28.97	1
Q9BYT8	Neurolysin, mitochondrial OS=Homo sapiens OX=9606 GN=NLN PE=1 SV=1	0	107.025	32	16	475	16	704	80.6	6.64	696.42	16	NLN	hsa:57486; Q9BYT8; Q9ULJ4	0	1.087	0.98901	69.83	93.3	106.7	40.93	58.31	1
Q9Y2W1	Thyroid hormone receptor-associated protein 3 OS=Homo sapiens OX=9606 GN=THRAP3 PE=1 SV=2	0	106.989	17	14	484	13	955	108.6	10.15	1001.34	14	THRAP3	D3DPS5; hsa:9967; Q5VTK6; Q9Y2W1	1	1.9	0.928554	62.11	59.2	140.8	25.33	42.85	1
Q96AB3	Isochorismatase domain-containing protein 2 OS=Homo sapiens OX=9606 GN=ISOC2 PE=1 SV=1	0	106.987	80	9	489	9	205	22.3	7.77	1318.99	9	ISOC2	hsa:79763; Q6ZN91; Q96AB3; Q9H5G0	0	0.957	0.971427	92.83	105.3	94.7	20.37	85.98	1
P18754	Regulator of chromosome condensation OS=Homo sapiens OX=9606 GN=RCC1 PE=1 SV=1	0	106.95	44	10	349	10	421	44.9	7.52	741.48	10	RCC1	hsa:1104; P18754; Q16269; Q6NT97	0	1.927	0.920971	67.44	56.9	143.1	14.15	46.59	1
P52597	Heterogeneous nuclear ribonucleoprotein F OS=Homo sapiens OX=9606 GN=HNRNPF PE=1 SV=3	0	106.923	39	9	508	9	415	45.6	5.58	1512.6	9	HNRNPF	B3KM84; hsa:3185; P52597; Q5T0N2; Q96AU2	0	1.948	0.916313	81.28	58.7	141.3	38.57	50.39	1	Met-loss+Acetyl [N-Term]
Q14444	Caprin-1 OS=Homo sapiens OX=9606 GN=CAPRIN1 PE=1 SV=2	0	106.907	26	12	498	12	709	78.3	5.25	1042.15	12	CAPRIN1	A6NMY7; D3DR06; hsa:4076; Q14444; Q15074; Q6IMN4; Q6IMN7; Q9BV09	0	2.502	0.703255	71.2	48.5	151.5	53.27	46.08	1
P13798	Acylamino-acid-releasing enzyme OS=Homo sapiens OX=9606 GN=APEH PE=1 SV=4	0	106.827	41	15	679	15	732	81.2	5.48	1485.14	15	APEH	hsa:327; P13798; Q9BQ33; Q9P0Y2	0	0.865	0.945498	65.25	129.4	70.6	19.33	34.11	1
P84085	ADP-ribosylation factor 5 OS=Homo sapiens OX=9606 GN=ARF5 PE=1 SV=2	0	106.813	52	10	656	4	180	20.5	6.79	1297.37	10	ARF5	hsa:381; P26437; P84085	0	1.388	0.99383	56.5	86	114	37.65	39.8	1
O60504	Vinexin OS=Homo sapiens OX=9606 GN=SORBS3 PE=1 SV=2	0	106.773	40	15	214	15	671	75.3	9.45	383.81	15	SORBS3	hsa:10174; O60504; Q5BJE4; Q6NX54; Q96FY4; Q9UQE4	0	0.892	0.925961	78.13	123.5	76.5	35.83	118.56	1
O75340	Programmed cell death protein 6 OS=Homo sapiens OX=9606 GN=PDCD6 PE=1 SV=1	0	106.706	65	9	593	9	191	21.9	5.4	1349.11	9	PDCD6	B2RD16; E7ESR3; hsa:10016; O75340; Q2YDC2; Q5TZS0	0	1.785	0.945498	64.24	78.2	121.8	21.4	24.05	1	Met-loss+Acetyl [N-Term]
P01911	HLA class II histocompatibility antigen, DRB1 beta chain OS=Homo sapiens OX=9606 GN=HLA-DRB1 PE=1 SV=2	0	106.705	45	8	306	5	266	29.9	7.74	615.21	8	HLA-DRB1	A0MWF2; A0N0W1; A2ICT1; A2TGX3; A4F5N0; A4ZXA5; A4ZXA6; A4ZY86; A5H000; A5HKN8; A7DZP9; A7LA26; A7UHG2; A7X5B1; A7X5B7; A7X5E0; A7X5E6; A7X5H8; A7X5J4; A7X5K7; A8K098; A8YQE9; A9JPG0; B0BK85; B0LUZ6; B0UYW1; B1GWE7; B2CR03; B2LVF9; B2NJ29; B2ZCY1; B3VTP8; B3VTQ3; B5A8Y2; B5A8Y3; B5B8U0; B5B9V5; B5B9V6; B5LZ25; B5QSK8; B6VCX2; B6VEL9; B7UDB2; B9VRA4; B9X248; C0LAB5; hsa:3123; O02876; O02930; O1958…	4	0.725	0.819168	97.16	142.6	57.4	68.45	141.57	1
A6NDB9	Paralemmin-3 OS=Homo sapiens OX=9606 GN=PALM3 PE=1 SV=2	0	106.658	45	16	182	16	673	71.7	4.53	288.82	16	PALM3	A6NDB9; hsa:342979	0	0.96	0.972713	49.77	117.2	82.8	14.5	19.51	1
Q9NR31	GTP-binding protein SAR1a OS=Homo sapiens OX=9606 GN=SAR1A PE=1 SV=1	0	106.624	74	11	669	7	198	22.4	6.68	1461.99	11	SAR1A	B4DQ19; hsa:56681; Q9NR31	0	1.327	0.99383	61.28	86.8	113.2	18.86	39.69	1
Q5T440	Putative transferase CAF17, mitochondrial OS=Homo sapiens OX=9606 GN=IBA57 PE=1 SV=1	0	106.561	38	10	256	10	356	38.1	9.83	410.56	10	IBA57	hsa:200205; Q5T440	0	1.213	0.998585	92.03	92.1	107.9	58.63	59.25	1
P27169	Serum paraoxonase/arylesterase 1 OS=Homo sapiens OX=9606 GN=PON1 PE=1 SV=3	0	106.536	43	9	377	8	355	39.7	5.22	802.63	9	PON1	B2RA40; hsa:5444; P27169; Q16052; Q6B0J6; Q9UCB1	0	0.806	0.925961	90.66	132.4	67.6	64.42	89.17	1	Met-loss [N-Term]
P08572	Collagen alpha-2(IV) chain OS=Homo sapiens OX=9606 GN=COL4A2 PE=1 SV=4	0	106.301	11	12	572	12	1712	167.4	8.66	1123.38	12	COL4A2	hsa:1284; P08572; Q14052; Q548C3; Q5VZA9; Q66K23	0	1.874	0.936314	83.39	66.3	133.7	57.47	57.58	1
P05026	Sodium/potassium-transporting ATPase subunit beta-1 OS=Homo sapiens OX=9606 GN=ATP1B1 PE=1 SV=1	0	106.295	41	11	627	11	303	35	8.53	1317.85	11	ATP1B1	hsa:481; P05026; Q5TGZ3	0	2.05	0.896215	59.72	62.2	137.8	43.41	35.35	1
Q14247	Src substrate cortactin OS=Homo sapiens OX=9606 GN=CTTN PE=1 SV=2	0	106.291	27	13	471	13	550	61.5	5.4	1070.94	13	CTTN	hsa:2017; Q14247; Q8N707; Q96H99	0	1.379	0.992504	69.14	84.1	115.9	50.21	53.25	1
P31146	Coronin-1A OS=Homo sapiens OX=9606 GN=CORO1A PE=1 SV=4	0	106.117	39	16	646	16	461	51	6.68	1436.51	16	CORO1A	B2RBL1; hsa:11151; P31146; Q2YD73	0	0.709	0.85856	92.18	127.7	72.3	24.97	30.61	1
Q9NR30	Nucleolar RNA helicase 2 OS=Homo sapiens OX=9606 GN=DDX21 PE=1 SV=5	0	106.025	19	14	186	12	783	87.3	9.28	334.8	14	DDX21	B2RDL0; hsa:9188; Q13436; Q5VX41; Q68D35; Q9NR30	3	3.138	0.339938	59.95	33.8	166.2	50.17	51.18	1
P36873	Serine/threonine-protein phosphatase PP1-gamma catalytic subunit OS=Homo sapiens OX=9606 GN=PPP1CC PE=1 SV=1	0	106.022	56	11	704	2	323	37	6.54	1315.17	11	PPP1CC	hsa:5501; P36873	0	1.106	0.975804	60.44	116.1	83.9	78.63	69.87	1
Q5QNW6	Histone H2B type 2-F OS=Homo sapiens OX=9606 GN=H2BC18 PE=1 SV=3	0	106.014	61	12	944	6	126	13.9	10.32	1998.3	12	H2BC18	A8K0U9; B4DLA9; hsa:440689; Q5QNW6	11	2.128	0.873719	78.91	88.7	111.3	18.29	39.18	1
P40925	Malate dehydrogenase, cytoplasmic OS=Homo sapiens OX=9606 GN=MDH1 PE=1 SV=4	0	105.952	32	10	1184	10	334	36.4	7.36	3139.73	10	MDH1	B2R5V5; B4DUN2; B7Z3I7; F5H098; hsa:4190; P40925; Q6I9V0	0	0.871	0.946005	59.68	113.1	86.9	19.5	60.97	1
O95757	Heat shock 70 kDa protein 4L OS=Homo sapiens OX=9606 GN=HSPA4L PE=1 SV=3	0	105.838	28	17	443	14	839	94.5	5.88	999.83	17	HSPA4L	A2ICT2; hsa:22824; O95757; Q4W5M5; Q8IWA2	0	1.42	0.98901	64.54	84.2	115.8	10.31	39.04	1
Q9NZN4	EH domain-containing protein 2 OS=Homo sapiens OX=9606 GN=EHD2 PE=1 SV=2	0	105.645	41	16	260	13	543	61.1	6.46	503.64	16	EHD2	B2RDH9; B4DNU6; hsa:30846; Q96CB6; Q9NZN4	0	0.629	0.610551	55.24	138.7	61.3	26.41	54.08	1
Q8TEX9	Importin-4 OS=Homo sapiens OX=9606 GN=IPO4 PE=1 SV=2	0	105.338	20	16	306	16	1081	118.6	4.96	558.58	16	IPO4	B2RN95; hsa:79711; Q2NL96; Q86TZ9; Q8NCG8; Q8TEX9; Q96SJ3; Q9BTI4; Q9H5L0	0	2.55	0.676483	70.54	59.1	140.9	37.32	42.24	1
P02753	Retinol-binding protein 4 OS=Homo sapiens OX=9606 GN=RBP4 PE=1 SV=3	0	105.243	78	12	644	12	201	23	6.07	928.44	12	RBP4	D3DR38; hsa:5950; O43478; O43479; P02753; Q5VY24; Q8WWA3; Q9P178	0	1.092	0.989214	91.48	123.7	76.3	45.45	59.04	1
P48739	Phosphatidylinositol transfer protein beta isoform OS=Homo sapiens OX=9606 GN=PITPNB PE=1 SV=2	0	105.093	65	16	654	12	271	31.5	6.87	1228.54	16	PITPNB	B3KYB8; B7Z7Q0; hsa:23760; P48739; Q8N5W1	4	1.507	0.979619	62	71.8	128.2	24.26	30.81	1
Q8TAQ2	SWI/SNF complex subunit SMARCC2 OS=Homo sapiens OX=9606 GN=SMARCC2 PE=1 SV=1	0	105.036	22	17	263	13	1214	132.8	5.69	402.12	17	SMARCC2	F8VTJ5; hsa:6601; Q59GV3; Q8TAQ2; Q92923; Q96E12; Q96GY4	4	1.746	0.956013	59.23	47	153	54.52	44.46	1
Q9Y5K5	Ubiquitin carboxyl-terminal hydrolase isozyme L5 OS=Homo sapiens OX=9606 GN=UCHL5 PE=1 SV=3	0	104.968	57	11	421	11	329	37.6	5.33	615.76	11	UCHL5	hsa:51377; Q5LJA6; Q5LJA7; Q8TBS4; Q96BJ9; Q9H1W5; Q9P0I3; Q9UQN2; Q9Y5K5	0	1.956	0.913854	48.19	67	133	22.07	27.58	1	Met-loss+Acetyl [N-Term]
P08123	Collagen alpha-2(I) chain OS=Homo sapiens OX=9606 GN=COL1A2 PE=1 SV=7	0	104.941	10	9	416	9	1366	129.2	8.95	1160.67	9	COL1A2	hsa:1278; P02464; P08123; Q13897; Q13997; Q13998; Q14038; Q14057; Q15177; Q15947; Q16480; Q16511; Q7Z5S6; Q9UEB6; Q9UEF9; Q9UM83; Q9UMI1; Q9UML5; Q9UMM6; Q9UPH0	0	0.521	0.494354	97.93	141.7	58.3	43.17	79.32	1
O76003	Glutaredoxin-3 OS=Homo sapiens OX=9606 GN=GLRX3 PE=1 SV=2	0	104.875	48	14	367	14	335	37.4	5.39	645.35	14	GLRX3	B3KMP7; B3KMQ5; D3DRG2; hsa:10539; O76003; Q5JV01; Q96CE0; Q9P1B0; Q9P1B1	0	1.65	0.964926	50.49	76.9	123.1	51.77	28.91	1
Q14789	Golgin subfamily B member 1 OS=Homo sapiens OX=9606 GN=GOLGB1 PE=1 SV=2	0	104.744	9	22	219	22	3259	375.8	5	291.56	22	GOLGB1	B2ZZ91; D3DN92; E7EP74; F1T0J2; hsa:2804; Q14398; Q14789	0	1.346	0.993203	48.48	83.5	116.5	12.09	22.29	1
P35658	Nuclear pore complex protein Nup214 OS=Homo sapiens OX=9606 GN=NUP214 PE=1 SV=2	0	104.712	13	18	181	18	2090	213.5	7.47	211.57	18	NUP214	A6NFQ0; hsa:8021; P35658; Q15010; Q3KQZ0; Q5JUP7; Q75R47; Q86XD3	0	0.567	0.597938	130.2	159.6	40.4	28.96	46.64	1
Q14534	Squalene monooxygenase OS=Homo sapiens OX=9606 GN=SQLE PE=1 SV=3	0	104.698	33	11	197	11	574	63.9	8.63	447.85	11	SQLE	hsa:6713; Q14534; Q9UEK6; Q9UNR6	0	2.499	0.650032	72.74	49.9	150.1	52.29	134.48	1
P49903	Selenide, water dikinase 1 OS=Homo sapiens OX=9606 GN=SEPHS1 PE=1 SV=2	0	104.547	40	9	581	9	392	42.9	5.97	1539.26	9	SEPHS1	B4DWK0; D3DRS9; D6PSQ9; hsa:22929; P49903; Q5T5U8; Q5T5U9; Q9BVT4	0	1.846	0.93931	64.88	68.1	131.9	30.57	44.49	1
O00515	Ladinin-1 OS=Homo sapiens OX=9606 GN=LAD1 PE=1 SV=2	0	104.387	36	16	315	16	517	57.1	9.67	542.93	16	LAD1	hsa:3898; O00515; O95614; Q96GD8	0	1.242	0.999419	102.08	102.2	97.8	22.06	60.94	1
Q9NZB2	Constitutive coactivator of PPAR-gamma-like protein 1 OS=Homo sapiens OX=9606 GN=FAM120A PE=1 SV=2	0	104.289	18	16	417	15	1118	121.8	8.88	667.12	16	FAM120A	A6NGU0; C4AMC6; hsa:23196; O60649; Q14688; Q4VXF4; Q4VXF5; Q4VXG2; Q86V69; Q96I21; Q9NZB1; Q9NZB2	1	1.498	0.980663	69.72	77.1	122.9	20.09	38.94	1	Met-loss [N-Term]
P54577	Tyrosine--tRNA ligase, cytoplasmic OS=Homo sapiens OX=9606 GN=YARS1 PE=1 SV=4	0	104.286	40	19	679	19	528	59.1	7.05	1289.88	19	YARS1	B3KWK4; D3DPQ4; hsa:8565; O43276; P54577; Q53EN1	0	1.383	0.992504	65.85	82.1	117.9	16.08	38.32	1
P00492	Hypoxanthine-guanine phosphoribosyltransferase OS=Homo sapiens OX=9606 GN=HPRT1 PE=1 SV=2	0	104.279	65	11	559	11	218	24.6	6.68	1090.99	11	HPRT1	A6NHF0; B2R8M9; hsa:3251; P00492	0	1.655	0.964205	55.74	65.6	134.4	29.07	25.3	1
Q9UBT2	SUMO-activating enzyme subunit 2 OS=Homo sapiens OX=9606 GN=UBA2 PE=1 SV=2	0	104.187	39	15	287	15	640	71.2	5.29	447.3	15	UBA2	B3KWB9; hsa:10054; O95605; Q59H87; Q6IBP6; Q9NTJ1; Q9UBT2; Q9UED2	0	2.072	0.896215	74.8	60.6	139.4	31.3	49.76	1
P07195	L-lactate dehydrogenase B chain OS=Homo sapiens OX=9606 GN=LDHB PE=1 SV=2	0	104.052	43	13	736	11	334	36.6	6.05	1697.63	13	LDHB	hsa:3945; P07195	0	0.504	0.443856	97.94	90.9	109.1	31.36	42.19	1
P50453	Serpin B9 OS=Homo sapiens OX=9606 GN=SERPINB9 PE=1 SV=1	0	104.008	51	18	426	16	376	42.4	5.86	734.58	18	SERPINB9	B2RBW3; hsa:5272; P50453; Q5TD03	1	1.073	0.988179	71.61	74.9	125.1	47.47	83.17	1
P07225	Vitamin K-dependent protein S OS=Homo sapiens OX=9606 GN=PROS1 PE=1 SV=1	0	103.932	22	12	196	12	676	75.1	5.67	339.45	12	PROS1	A8KAC9; D3DN28; hsa:5627; P07225; Q15518; Q7Z715; Q9UCZ8	0	1.781	0.945498	70.79	69	131	22.97	71.4	1
O00232	26S proteasome non-ATPase regulatory subunit 12 OS=Homo sapiens OX=9606 GN=PSMD12 PE=1 SV=3	0	103.896	43	15	642	15	456	52.9	7.65	1277.59	15	PSMD12	A6NP15; hsa:5718; O00232; Q53HA2; Q6P053	0	1.458	0.984689	45.88	71.5	128.5	15.13	25.38	1
O15460	Prolyl 4-hydroxylase subunit alpha-2 OS=Homo sapiens OX=9606 GN=P4HA2 PE=1 SV=1	0	103.802	33	13	156	13	535	60.9	5.71	271.9	13	P4HA2	D3DQ85; D3DQ86; hsa:8974; O15460; Q8WWN0	0	2.171	0.851164	68.71	48.9	151.1	62.27	120.6	1
Q9NTJ4	Alpha-mannosidase 2C1 OS=Homo sapiens OX=9606 GN=MAN2C1 PE=1 SV=1	0	103.526	24	16	108	16	1040	115.8	6.57	273.96	16	MAN2C1	H3BMX2; H3BQY8; H3BUT6; hsa:4123; Q13358; Q68EM8; Q9NTJ4; Q9UL64	0	1.855	0.940848	56.61	79.8	120.2	28.56	90.08	1
Q9P0K7	Ankycorbin OS=Homo sapiens OX=9606 GN=RAI14 PE=1 SV=2	0	103.42	23	19	262	19	980	110	6.21	325.91	19	RAI14	E9PED3; hsa:26064; Q6V1W9; Q7Z5I4; Q7Z733; Q9P0K7; Q9P2L2; Q9Y3T5	0	0.806	0.925961	78.16	157.4	42.6	36.44	64.85	1
O15254	Peroxisomal acyl-coenzyme A oxidase 3 OS=Homo sapiens OX=9606 GN=ACOX3 PE=1 SV=2	0	103.389	29	13	238	13	700	77.6	7.25	414.16	13	ACOX3	hsa:8310; O15254; Q96AJ8	0	1.539	0.984689	92.31	100.3	99.7	36.72	88.03	1
P51687	Sulfite oxidase, mitochondrial OS=Homo sapiens OX=9606 GN=SUOX PE=1 SV=2	0	103.225	37	9	368	9	545	60.2	6.11	853.87	9	SUOX	hsa:6821; P51687	0	0.535	0.522184	73.59	137.8	62.2	17.87	39.17	1
P49755	Transmembrane emp24 domain-containing protein 10 OS=Homo sapiens OX=9606 GN=TMED10 PE=1 SV=2	0	103.067	44	11	616	11	219	25	7.44	1537.43	11	TMED10	B2R605; hsa:10972; P49755; Q15602; Q16536; Q86TC2; Q86TS5	0	1.272	0.998449	66.65	90.1	109.9	22.22	33.04	1
Q96JQ2	Calmin OS=Homo sapiens OX=9606 GN=CLMN PE=1 SV=1	0	102.986	26	18	257	18	1002	111.6	4.94	263.9	18	CLMN	B2RAR7; hsa:79789; Q96JQ2; Q9H713; Q9HA23; Q9HA57; Q9UFP4; Q9ULN2	0	1.714	0.957629	73.26	67.2	132.8	40.42	54.44	1	Met-loss+Acetyl [N-Term]
Q8NC51	Plasminogen activator inhibitor 1 RNA-binding protein OS=Homo sapiens OX=9606 GN=SERBP1 PE=1 SV=2	0	102.983	37	11	419	11	408	44.9	8.65	827.43	11	SERBP1	hsa:26135; Q5VU19; Q5VU20; Q5VU22; Q8NC51; Q8WUH0; Q96SE2; Q9BTY3; Q9BUM4; Q9Y367; Q9Y4S3	0	2.108	0.881111	66.5	56.7	143.3	34.85	54.21	1	Met-loss [N-Term]
Q86V81	THO complex subunit 4 OS=Homo sapiens OX=9606 GN=ALYREF PE=1 SV=3	0	102.829	51	9	359	9	257	26.9	11.15	799.56	9	ALYREF	hsa:10189; O43672; Q86V81	0	2.837	0.537767	76.27	50.8	149.2	32.73	38.95	1	Met-loss+Acetyl [N-Term]
P09543	2',3'-cyclic-nucleotide 3'-phosphodiesterase OS=Homo sapiens OX=9606 GN=CNP PE=1 SV=2	0	102.563	32	14	409	14	421	47.5	9.07	1052.99	14	CNP	hsa:1267; P09543	0	1.9	0.928554	71.43	59.7	140.3	34.22	47.08	1
P0DOX6	Immunoglobulin mu heavy chain OS=Homo sapiens OX=9606 PE=1 SV=2	0	102.518	32	14	974	1	576	63.4	7.87	1526.64	14			0	0.592	0.313666	75.11	134.8	65.2	41.43	69.24	1
Q96CM8	Medium-chain acyl-CoA ligase ACSF2, mitochondrial OS=Homo sapiens OX=9606 GN=ACSF2 PE=1 SV=2	0	102.517	32	12	543	12	615	68.1	7.55	1200.26	12	ACSF2	B4DFQ6; B4DHT5; B4DUF5; hsa:80221; Q96CM8; Q9H7G2	0	1.378	0.992504	67.05	86.9	113.1	22.63	67.2	1
Q99733	Nucleosome assembly protein 1-like 4 OS=Homo sapiens OX=9606 GN=NAP1L4 PE=1 SV=1	0	102.461	42	12	538	10	375	42.8	4.69	1017.85	12	NAP1L4	B2R6J4; F5HFY4; hsa:4676; Q99733	2	2.659	0.621817	63.12	43.7	156.3	45.16	18.49	1	Met-loss+Acetyl [N-Term]
Q9BSH5	Haloacid dehalogenase-like hydrolase domain-containing protein 3 OS=Homo sapiens OX=9606 GN=HDHD3 PE=1 SV=1	0	102.376	65	11	425	11	251	28	6.71	1087.98	11	HDHD3	B2RD47; hsa:81932; Q9BSH5	0	1.323	0.99383	84.2	88.1	111.9	24.73	87.23	1
P09417	Dihydropteridine reductase OS=Homo sapiens OX=9606 GN=QDPR PE=1 SV=2	0	102.327	70	12	612	12	244	25.8	7.37	1561.46	12	QDPR	A8K158; B3KW71; hsa:5860; P09417; Q53F52; Q9H3M5	0	0.517	0.484512	90.38	161.2	38.8	38.5	76.79	1	Met-loss+Acetyl [N-Term]
O94906	Pre-mRNA-processing factor 6 OS=Homo sapiens OX=9606 GN=PRPF6 PE=1 SV=1	0	102.189	21	16	222	16	941	106.9	8.25	351.6	16	PRPF6	B2RAR5; B3KMC6; hsa:24148; O94906; O95109; Q5VXS5; Q9H3Z1; Q9H4T9; Q9H4U8; Q9NTE6	0	1.805	0.940848	65.25	66.5	133.5	39.99	34.85	1
P15531	Nucleoside diphosphate kinase A OS=Homo sapiens OX=9606 GN=NME1 PE=1 SV=1	0	102.045	86	13	1319	7	152	17.1	6.19	2931.27	13	NME1	hsa:4830; P15531; Q6FGK3; Q86XQ2; Q9UDJ6	5	2.096	0.8812	54.04	65.1	134.9	35.73	15.88	1
Q15691	Microtubule-associated protein RP/EB family member 1 OS=Homo sapiens OX=9606 GN=MAPRE1 PE=1 SV=3	0	101.997	61	12	444	11	268	30	5.14	840.04	12	MAPRE1	B2R6I7; E1P5M8; hsa:22919; Q15691; Q3KQS8	1	2.002	0.905631	83.28	39.5	160.5	62.7	50.36	1
Q9P2R3	Rabankyrin-5 OS=Homo sapiens OX=9606 GN=ANKFY1 PE=1 SV=2	0	101.977	19	13	306	13	1169	128.3	6.1	594.92	13	ANKFY1	A8KA65; hsa:51479; Q5RKV4; Q9P2R3; Q9ULG5	0	1.041	0.975926	60.6	104.7	95.3	23.84	43.57	1
P40121	Macrophage-capping protein OS=Homo sapiens OX=9606 GN=CAPG PE=1 SV=2	0	101.907	53	12	459	12	348	38.5	6.19	1094.46	12	CAPG	B8ZZS7; D6W5K8; hsa:822; P40121; Q53SA7	0	1.415	0.98901	112.39	89.3	110.7	84.16	105.19	1	Acetyl [N-Term]
P50851	Lipopolysaccharide-responsive and beige-like anchor protein OS=Homo sapiens OX=9606 GN=LRBA PE=1 SV=4	0	101.776	9	20	282	17	2863	318.9	5.6	331.92	20	LRBA	hsa:987; P50851; Q4W5J4; Q4W5L6; Q8NFQ0; Q9H2U3; Q9H2U4	2	1.178	0.99383	68.39	111.7	88.3	24.32	69.68	1
P56192	Methionine--tRNA ligase, cytoplasmic OS=Homo sapiens OX=9606 GN=MARS1 PE=1 SV=2	0	101.697	23	12	349	12	900	101.1	6.16	596.89	12	MARS1	B3KVK7; hsa:4141; P56192; Q14895; Q53H14; Q96A15; Q96BZ0; Q9NSE0	0	1.731	0.956801	54.71	59.1	140.9	35.59	56.06	1
P61201	COP9 signalosome complex subunit 2 OS=Homo sapiens OX=9606 GN=COPS2 PE=1 SV=1	0	101.656	37	12	261	12	443	51.6	5.53	451.4	12	COPS2	hsa:9318; O88950; P61201; Q15647; Q6FGP4; Q9BY54; Q9R249; Q9UNI2; Q9UNQ5	0	1.416	0.992504	53.87	78.8	121.2	147.04	37.41	1
P02792	Ferritin light chain OS=Homo sapiens OX=9606 GN=FTL PE=1 SV=2	0	101.607	40	8	303	8	175	20	5.78	847.6	8	FTL	B2R4B9; hsa:2512; P02792; Q6IBT7; Q7Z2W1; Q86WI9; Q8WU07; Q96AU9; Q96CU0; Q9BTZ8	0	0.54	0.534109	101.96	144.9	55.1	89.2	65.36	1
P12236	ADP/ATP translocase 3 OS=Homo sapiens OX=9606 GN=SLC25A6 PE=1 SV=4	0	101.435	48	15	796	2	298	32.8	9.74	1578.24	15	SLC25A6	hsa:293; P12236; Q96C49	5	1.455	0.984689	59	87	113	29.36	51.68	1	Met-loss+Acetyl [N-Term]
P20674	Cytochrome c oxidase subunit 5A, mitochondrial OS=Homo sapiens OX=9606 GN=COX5A PE=1 SV=2	0	101.213	46	6	331	6	150	16.8	6.79	964.19	6	COX5A	hsa:9377; P20674; P30045; Q8TB65	0	1.031	0.980663	85.36	110.3	89.7	39.18	57.35	1
P06132	Uroporphyrinogen decarboxylase OS=Homo sapiens OX=9606 GN=UROD PE=1 SV=2	0	101.152	38	9	391	9	367	40.8	6.14	901.45	9	UROD	A8K762; hsa:7389; P06132; Q16863; Q16883; Q53YB8; Q53ZP6; Q6IB28; Q9BUZ0	0	1.162	0.99383	58.3	90.2	109.8	23.53	51.37	1
Q92888	Rho guanine nucleotide exchange factor 1 OS=Homo sapiens OX=9606 GN=ARHGEF1 PE=1 SV=2	0	101.148	30	22	436	22	912	102.4	5.66	462.53	22	ARHGEF1	hsa:9138; O00513; Q6NX52; Q8N4J4; Q92888; Q96BF4; Q96F17; Q9BSB1	0	1.351	0.992504	68.82	76.8	123.2	45.12	54.59	1
P09871	Complement C1s subcomponent OS=Homo sapiens OX=9606 GN=C1S PE=1 SV=1	0	100.946	33	14	396	14	688	76.6	4.96	636.32	14	C1S	D3DUT4; hsa:716; P09871; Q9UCU7; Q9UCU8; Q9UCU9; Q9UCV0; Q9UCV1; Q9UCV2; Q9UCV3; Q9UCV4; Q9UCV5; Q9UM14	0	1.147	0.99383	57.24	103.3	96.7	16.6	39.18	1
Q15599	Na(+)/H(+) exchange regulatory cofactor NHE-RF2 OS=Homo sapiens OX=9606 GN=SLC9A3R2 PE=1 SV=2	0	100.932	47	10	346	10	337	37.4	7.93	670.59	10	NHERF2	D3DU84; D3DU85; H3BSV6; hsa:9351; O00272; O00556; Q15599; Q3KQY7	0	1.165	0.99383	56.53	102.8	97.2	14.6	27.55	1	Met-loss+Acetyl [N-Term]
Q9BX66	Sorbin and SH3 domain-containing protein 1 OS=Homo sapiens OX=9606 GN=SORBS1 PE=1 SV=3	0	100.873	17	17	383	16	1292	142.4	6.84	550.03	17	SORBS1	A0AED4; A6NEK3; A6NID8; A6NJS4; A7MD40; D3DR42; hsa:10580; O43857; Q5T923; Q5T924; Q5T927; Q5T928; Q5T929; Q5T930; Q5T931; Q5T932; Q7LBE5; Q8IVK0; Q8IVQ4; Q96KF3; Q96KF4; Q9BX64; Q9BX65; Q9BX66; Q9P2Q0; Q9UFT2; Q9UHN7; Q9Y338	1	0.912	0.957664	75.32	73.5	126.5	67.89	60.36	1
Q99436	Proteasome subunit beta type-7 OS=Homo sapiens OX=9606 GN=PSMB7 PE=1 SV=1	0	100.34	48	10	358	10	277	29.9	7.68	860.64	10	PSMB7	B4E0P1; hsa:5695; Q5TBG6; Q96AG8; Q99436; Q9BWA7	0	1.397	0.9904	62.78	85.6	114.4	24.81	40.78	1
Q9UBV2	Protein sel-1 homolog 1 OS=Homo sapiens OX=9606 GN=SEL1L PE=1 SV=3	0	100.297	31	13	241	13	794	88.7	5.39	412.18	13	SEL1L	hsa:6400; Q6UWT6; Q9P1T9; Q9UBV2; Q9UHK7	0	1.588	0.978845	54.46	77.9	122.1	23.3	57.42	1
P00740	Coagulation factor IX OS=Homo sapiens OX=9606 GN=F9 PE=1 SV=2	0	100.25	30	10	346	10	461	51.7	5.47	704.28	10	F9	A8K9N4; F2RM36; hsa:2158; P00740; Q5FBE1; Q5JYJ8	0	0.675	0.806369	70.31	136	64	20.8	67.03	1
P62330	ADP-ribosylation factor 6 OS=Homo sapiens OX=9606 GN=ARF6 PE=1 SV=2	0	100.203	67	11	604	11	175	20.1	8.95	1269.71	11	ARF6	hsa:382; P26438; P62330; Q6FGZ2	0	1.024	0.980663	80.06	110.6	89.4	12.07	59.74	1
P22090	40S ribosomal protein S4, Y isoform 1 OS=Homo sapiens OX=9606 GN=RPS4Y1 PE=1 SV=2	0	100.074	35	10	456	4	263	29.4	10.24	1178.99	10	RPS4Y1	A8K9V4; hsa:6192; P22090	0	1.385	0.992504	62.37	145.9	54.1	71.11	86.68	1
A0MZ66	Shootin-1 OS=Homo sapiens OX=9606 GN=SHTN1 PE=1 SV=4	0	99.931	31	17	401	17	631	71.6	5.33	496.97	17	SHTN1	A0MZ66; A8MYU7; B3KRD3; B3KRH2; B3KTE0; B3KTJ7; B3KTJ8; B4E3U1; B7Z7Z9; hsa:57698; Q68DG1; Q6PIM5; Q9HCH4; Q9NUV0	0	1.112	0.992504	63.56	100	100	21.92	49.25	1
P08574	Cytochrome c1, heme protein, mitochondrial OS=Homo sapiens OX=9606 GN=CYC1 PE=1 SV=3	0	99.714	30	8	263	8	325	35.4	9	750.22	8	CYC1	hsa:1537; P08574; Q5U062; Q6FHS7	0	1.799	0.940848	76.75	78.7	121.3	28.52	40.51	1
Q9NQG5	Regulation of nuclear pre-mRNA domain-containing protein 1B OS=Homo sapiens OX=9606 GN=RPRD1B PE=1 SV=1	0	99.706	37	10	347	8	326	36.9	5.97	622.16	10	RPRD1B	hsa:58490; Q1WDE7; Q6PKF4; Q9NQG5	4	2.113	0.879499	60.65	55.6	144.4	35.09	37.51	1	Met-loss+Acetyl [N-Term]
A1L0T0	2-hydroxyacyl-CoA lyase 2 OS=Homo sapiens OX=9606 GN=ILVBL PE=1 SV=2	0	99.453	32	9	303	9	632	67.8	8.15	868.62	9	ILVBL	A1L0T0; hsa:10994; O43341; Q96F08; Q99651; Q9BWN5; Q9UEB2	0	0.946	0.968009	51.97	101.1	98.9	11.47	38.63	1
Q9Y5U8	Mitochondrial pyruvate carrier 1 OS=Homo sapiens OX=9606 GN=MPC1 PE=1 SV=1	0	99.413	44	3	156	3	109	12.3	9.61	481.56	3	MPC1	B2R5I7; hsa:51660; Q5TI66; Q9HB67; Q9UQN4; Q9Y5U8	0	1.248	0.99383	95.76	101.7	98.3	55.15	123.91	1
O95163	Elongator complex protein 1 OS=Homo sapiens OX=9606 GN=ELP1 PE=1 SV=3	0	99.373	20	20	158	20	1332	150.2	5.94	214.07	20	ELP1	hsa:8518; O95163; Q5JSV2; Q9H327; Q9UG87	0	1.618	0.96933	72.65	83.3	116.7	23.8	67.59	1
Q16666	Gamma-interferon-inducible protein 16 OS=Homo sapiens OX=9606 GN=IFI16 PE=1 SV=3	0	99.311	29	16	289	16	785	88.2	9.28	520.58	16	IFI16	A0A346JEQ3; B4DJT8; H3BLV7; hsa:3428; Q16666; Q59GX0; Q5T3W7; Q5T3W8; Q5T3X0; Q5T3X1; Q5T3X2; Q8N9E5; Q8NEQ7; Q96AJ5; Q9UH78	0	1.389	0.99383	90.34	96.4	103.6	29.38	91.76	1
P50135	Histamine N-methyltransferase OS=Homo sapiens OX=9606 GN=HNMT PE=1 SV=1	0	99.301	47	9	431	9	292	33.3	5.34	914.99	9	HNMT	B2R9J3; hsa:3176; P50135; Q546Z6; Q7Z7I2; Q8IU56; Q8WW98; Q9BRW6	0	0.933	0.964926	109.54	121.3	78.7	34	95.16	1
Q86VB7	Scavenger receptor cysteine-rich type 1 protein M130 OS=Homo sapiens OX=9606 GN=CD163 PE=1 SV=2	0	99.283	20	14	237	14	1156	125.4	5.95	405.03	14	CD163	C9JIG2; hsa:9332; Q07898; Q07899; Q07900; Q07901; Q2VLH7; Q86VB7	0	0.791	0.916471	76.72	128.2	71.8	18.65	52.82	1
Q16850	Lanosterol 14-alpha demethylase OS=Homo sapiens OX=9606 GN=CYP51A1 PE=1 SV=4	0	99.211	41	15	326	15	509	57.2	8.53	516.64	15	CYP51A1	A0A0C4DFL7; A4D1F8; B2RAI4; B4DJ55; hsa:1595; O00770; O00772; Q16784; Q16850; Q8N1A8; Q99868	0	1.416	0.98901	88.35	80.7	119.3	41.67	66.9	1
P17066	Heat shock 70 kDa protein 6 OS=Homo sapiens OX=9606 GN=HSPA6 PE=1 SV=2	0	99.132	26	14	1241	2	643	71	6.14	2507.96	14	HSPA6	hsa:3310; P17066; Q1HBA8; Q8IYK7; Q9BT95	0	0.965	0.929221	51.92	64	136	40.73	78.84	1
Q92804	TATA-binding protein-associated factor 2N OS=Homo sapiens OX=9606 GN=TAF15 PE=1 SV=1	0	99.016	17	5	349	3	592	61.8	8.02	827.28	5	TAF15	B2R837; hsa:8148; Q86X94; Q92751; Q92804	0	2.417	0.749698	62.02	51.2	148.8	52.13	44.85	1
Q02878	60S ribosomal protein L6 OS=Homo sapiens OX=9606 GN=RPL6 PE=1 SV=3	0	98.932	42	15	755	15	288	32.7	10.58	1409.4	15	RPL6	hsa:6128; Q02878; Q2M3Q3; Q8WW97	0	1.572	0.973897	70.57	78	122	12.53	55.88	1
P21912	Succinate dehydrogenase [ubiquinone] iron-sulfur subunit, mitochondrial OS=Homo sapiens OX=9606 GN=SDHB PE=1 SV=3	0	98.714	56	12	1119	12	280	31.6	8.76	2046.83	12	SDHB	B2R545; hsa:6390; P21912; Q0QEY7; Q9NQ12	0	0.722	0.873719	57.65	118.4	81.6	19.27	31.43	1
Q9NQT8	Kinesin-like protein KIF13B OS=Homo sapiens OX=9606 GN=KIF13B PE=1 SV=2	0	98.579	14	18	234	15	1826	202.7	5.88	329.97	18	KIF13B	B4DGY5; B5MC45; F8VPJ2; hsa:23303; O75134; Q9BYJ6; Q9NQT8	2	1.495	0.984689	63.77	97.6	102.4	24.46	67.12	1
Q9UBN7	Histone deacetylase 6 OS=Homo sapiens OX=9606 GN=HDAC6 PE=1 SV=2	0	98.553	18	12	292	12	1215	131.3	5.3	439.29	12	HDAC6	hsa:10013; O94975; Q6NT75; Q7L3E5; Q96CY0; Q9UBN7	0	0.599	0.669796	76.77	133.9	66.1	53.71	77.53	1
O00625	Pirin OS=Homo sapiens OX=9606 GN=PIR PE=1 SV=1	0	98.549	40	7	236	7	290	32.1	6.92	405.01	7	PIR	hsa:8544; O00625; Q5U0G0; Q6FHD2	0	1.648	0.971264	74.36	74.2	125.8	42.99	74.37	1
Q86TI2	Dipeptidyl peptidase 9 OS=Homo sapiens OX=9606 GN=DPP9 PE=1 SV=3	0	98.544	32	19	216	19	863	98.2	6.46	253.43	19	DPP9	hsa:91039; O75273; O75868; Q1ZZB8; Q6AI37; Q6UAL0; Q6ZMT2; Q6ZNJ5; Q86TI2; Q8N2J7; Q8N3F5; Q8WXD8; Q96NT8; Q9BVR3	0	1.205	0.9904	79.12	91.8	108.2	40.85	75.95	1	Met-loss+Acetyl [N-Term]
P12955	Xaa-Pro dipeptidase OS=Homo sapiens OX=9606 GN=PEPD PE=1 SV=3	0	98.522	42	13	576	13	493	54.5	6	950.96	13	PEPD	A8K3Z1; A8K416; A8K696; A8MX47; B4DDB7; B4DGJ1; E9PCE8; hsa:5184; P12955; Q8TBN9; Q9BT75	0	1.027	0.980663	61.08	116.5	83.5	45.5	43.08	1
O60271	C-Jun-amino-terminal kinase-interacting protein 4 OS=Homo sapiens OX=9606 GN=SPAG9 PE=1 SV=4	0	98.503	17	15	216	15	1321	146.1	5.15	260.04	15	SPAG9	A6H8U5; A8MSX0; B4DHH2; hsa:9043; O60271; O60905; Q3KQU8; Q3MKM7; Q86WC7; Q86WC8; Q8IZX7; Q96II0; Q9H811	0	1.377	0.992504	66.62	91.2	108.8	19.36	28.6	1
Q00325	Phosphate carrier protein, mitochondrial OS=Homo sapiens OX=9606 GN=SLC25A3 PE=1 SV=2	0	98.499	31	14	975	14	362	40.1	9.38	1773.48	14	SLC25A3	B3KS34; hsa:5250; Q00325; Q7Z7N7; Q96A03	0	1.15	0.99383	62.11	88.1	111.9	10.24	27.59	1
Q9UKM9	RNA-binding protein Raly OS=Homo sapiens OX=9606 GN=RALY PE=1 SV=1	0	98.381	64	12	343	12	306	32.4	9.17	853.95	12	RALY	hsa:22913; Q14621; Q2M365; Q5QPL8; Q9BQX6; Q9UJE3; Q9UKM9	0	2.738	0.586074	73.37	42.1	157.9	54.05	40.06	1
Q9Y2A7	Nck-associated protein 1 OS=Homo sapiens OX=9606 GN=NCKAP1 PE=1 SV=1	0	98.354	20	14	253	14	1128	128.7	6.62	420.48	14	NCKAP1	hsa:10787; O60329; Q53QN5; Q53S94; Q53Y35; Q9Y2A7	0	1.575	0.975926	56.51	67.5	132.5	26.49	53.9	1
P05543	Thyroxine-binding globulin OS=Homo sapiens OX=9606 GN=SERPINA7 PE=1 SV=2	0	98.338	40	11	205	11	415	46.3	6.3	415.55	11	SERPINA7	D3DUX1; hsa:6906; P05543	0	1.509	0.983577	62.47	78.6	121.4	35.74	65.14	1
Q13057	Bifunctional coenzyme A synthase OS=Homo sapiens OX=9606 GN=COASY PE=1 SV=4	0	98.328	40	12	352	12	564	62.3	6.99	843.49	12	COASY	B2RA78; B4DLU0; hsa:80347; Q13057; Q6GS23; Q8NBM7; Q8NEW1; Q8WXD4; Q9NRM3	0	1.569	0.97451	73.98	54.9	145.1	24.09	46.1	1
Q9H3S7	Tyrosine-protein phosphatase non-receptor type 23 OS=Homo sapiens OX=9606 GN=PTPN23 PE=1 SV=1	0	98.279	17	18	336	18	1636	178.9	6.92	530.72	18	PTPN23	A8K0D7; hsa:25930; Q7KZF8; Q8N6Z5; Q9BSR5; Q9H3S7; Q9P257; Q9UG03; Q9UMZ4	0	1.183	0.996481	68.44	104.8	95.2	24.62	26.99	1
Q9UHG3	Prenylcysteine oxidase 1 OS=Homo sapiens OX=9606 GN=PCYOX1 PE=1 SV=3	0	98.262	33	14	852	14	505	56.6	6.18	1666.4	14	PCYOX1	B2RB14; B7Z9P8; hsa:51449; O94982; Q8N4N5; Q96QM8; Q9UHG3	0	0.647	0.76002	50.19	131.5	68.5	15.54	27.86	1
P60228	Eukaryotic translation initiation factor 3 subunit E OS=Homo sapiens OX=9606 GN=EIF3E PE=1 SV=1	0	98.247	43	15	666	15	445	52.2	6.04	1043.52	15	EIF3E	hsa:3646; O43902; P60228; Q64058; Q64059; Q64252; Q6FG33; Q8WVK4	0	1.854	0.938291	50.45	59.9	140.1	20.03	25.96	1	Met-loss+Acetyl [N-Term]
Q969V3	Nicalin OS=Homo sapiens OX=9606 GN=NCLN PE=1 SV=2	0	98.186	29	12	324	12	563	62.9	6.89	633.09	12	NCLN	D6W613; hsa:56926; O75252; Q6FI60; Q6ZMB7; Q8TAT7; Q969V3; Q96H48; Q96IS7; Q9BQH9; Q9BTX4; Q9NPP2	0	1.273	0.998585	47.69	87.9	112.1	20.56	28.11	1
Q6PKG0	La-related protein 1 OS=Homo sapiens OX=9606 GN=LARP1 PE=1 SV=2	0	98.156	24	16	120	16	1096	123.4	8.82	128.6	16	LARP1	hsa:23367; O94836; Q6PKG0; Q8N4M2; Q8NB73; Q9UFD7	0	1.361	0.992504	94.57	93.6	106.4	35.54	27.41	1
P08697	Alpha-2-antiplasmin OS=Homo sapiens OX=9606 GN=SERPINF2 PE=1 SV=3	0	98.151	36	12	330	12	491	54.5	6.29	812.57	12	SERPINF2	B4E1B7; hsa:5345; P08697; Q8N5U7; Q9UCG2; Q9UCG3	0	1.336	0.99383	70.09	85.1	114.9	29.57	57.89	1
P36955	Pigment epithelium-derived factor OS=Homo sapiens OX=9606 GN=SERPINF1 PE=1 SV=4	0	98.147	39	13	563	13	418	46.3	6.38	1165.64	13	SERPINF1	F1T092; hsa:5176; P36955; Q13236; Q2TU83; Q96CT1; Q96R01; Q9BWA4	0	2.043	0.896698	75.52	48.3	151.7	80.43	52.75	1
Q9NUQ6	SPATS2-like protein OS=Homo sapiens OX=9606 GN=SPATS2L PE=1 SV=2	0	97.803	34	12	212	12	558	61.7	9.64	289.2	12	SPATS2L	A8K381; B4DRE6; B4DT67; B7WNZ7; hsa:26010; Q53T22; Q8WV53; Q8WYG1; Q9NTW4; Q9NUQ6	0	1.672	0.964205	70.13	47.2	152.8	26.87	83.9	1	Met-loss+Acetyl [N-Term]
P00568	Adenylate kinase isoenzyme 1 OS=Homo sapiens OX=9606 GN=AK1 PE=1 SV=3	0	97.786	52	10	670	10	194	21.6	8.63	1381.58	10	AK1	hsa:203; P00568; Q9BVK9; Q9UQC7	0	1.167	0.99383	65.25	92.7	107.3	14.9	53.13	1
P78344	Eukaryotic translation initiation factor 4 gamma 2 OS=Homo sapiens OX=9606 GN=EIF4G2 PE=1 SV=1	0	97.784	25	18	286	18	907	102.3	7.14	451.06	18	EIF4G2	hsa:1982; O60877; P78344; P78404; Q0VH00; Q0VH01; Q2NKW9; Q49A79; Q53EU1; Q58EZ2; Q8NI71; Q96C16	0	2.005	0.905631	52.47	41.6	158.4	49.5	23.68	1
Q9UNF0	Protein kinase C and casein kinase substrate in neurons protein 2 OS=Homo sapiens OX=9606 GN=PACSIN2 PE=1 SV=2	0	97.77	29	12	604	12	486	55.7	5.2	1201.05	12	PACSIN2	hsa:11252; O95921; Q96HV9; Q9H0D3; Q9NPN1; Q9UNF0; Q9Y4V2	0	2.386	0.759802	48.54	51.2	148.8	37.81	33.3	1
Q9Y285	Phenylalanine--tRNA ligase alpha subunit OS=Homo sapiens OX=9606 GN=FARSA PE=1 SV=3	0	97.737	43	14	433	14	508	57.5	7.8	1119.63	14	FARSA	B4E363; hsa:2193; Q9NSD8; Q9Y285; Q9Y4W8	0	2.544	0.678979	49.42	49.5	150.5	21.64	24.58	1
P22830	Ferrochelatase, mitochondrial OS=Homo sapiens OX=9606 GN=FECH PE=1 SV=2	0	97.7	28	10	349	10	423	47.8	8.73	682.89	10	FECH	A8KA72; hsa:2235; P22830; Q8IXN1; Q8NAN0	0	0.784	0.904295	72.84	141.5	58.5	29.56	93.15	1
Q13363	C-terminal-binding protein 1 OS=Homo sapiens OX=9606 GN=CTBP1 PE=1 SV=2	0	97.681	34	11	331	10	440	47.5	6.77	725.43	11	CTBP1	hsa:1487; Q13363; Q4W5N3; Q7Z2Q5	1	1.581	0.974656	64.88	76.1	123.9	21.51	59.25	1
P57737	Coronin-7 OS=Homo sapiens OX=9606 GN=CORO7 PE=1 SV=2	0	97.553	26	13	364	13	925	100.5	5.8	789.28	13	CORO7	B4DFD6; B4DL18; hsa:79585; I3L416; P57737; Q17RK4	0	1.028	0.97911	70.5	97.3	102.7	40	54.64	1
O43747	AP-1 complex subunit gamma-1 OS=Homo sapiens OX=9606 GN=AP1G1 PE=1 SV=5	0	97.477	22	13	164	12	822	91.3	6.8	183.94	13	AP1G1	hsa:164; O43747; O75709; O75842; Q9UG09; Q9Y3U4	1	1.029	0.980663	70.19	93.4	106.6	24.11	106.71	1
P46782	40S ribosomal protein S5 OS=Homo sapiens OX=9606 GN=RPS5 PE=1 SV=4	0	97.468	50	7	395	7	204	22.9	9.72	1004.68	7	RPS5	B2R4T2; hsa:6193; P46782; Q96BN0	0	2.074	0.886404	79.93	50.2	149.8	48.26	38.8	1
Q12907	Vesicular integral-membrane protein VIP36 OS=Homo sapiens OX=9606 GN=LMAN2 PE=1 SV=1	0	97.448	40	12	535	12	356	40.2	6.95	929.04	12	LMAN2	hsa:10960; Q12907; Q53HH1	0	1.116	0.992504	54.05	88.6	111.4	17.09	28.33	1
P62263	40S ribosomal protein S14 OS=Homo sapiens OX=9606 GN=RPS14 PE=1 SV=3	0	97.299	70	8	502	8	151	16.3	10.05	1392.17	8	RPS14	B2R5G5; D3DQG5; hsa:6208; P06366; P62263; Q5BJI0	0	2.051	0.896215	65.47	69.1	130.9	13.39	42.99	1
Q16719	Kynureninase OS=Homo sapiens OX=9606 GN=KYNU PE=1 SV=1	0	97.287	42	13	238	13	465	52.3	7.03	488	13	KYNU	B2RCZ5; D3DP79; hsa:8942; Q16719; Q6I9T2; Q9BVW3	0	0.721	0.864761	74.58	148.3	51.7	38.46	83.6	1	Acetyl [N-Term]
P99999	Cytochrome c OS=Homo sapiens OX=9606 GN=CYCS PE=1 SV=2	0	97.28	66	11	550	11	105	11.7	9.57	1235.92	11	CYCS	A4D166; B2R4I1; hsa:54205; P00001; P99999; Q6NUR2; Q6NX69; Q96BV4	0	1.628	0.966655	56.28	89.4	110.6	20.32	37.58	1
O00264	Membrane-associated progesterone receptor component 1 OS=Homo sapiens OX=9606 GN=PGRMC1 PE=1 SV=3	0	97.236	61	9	653	8	195	21.7	4.7	1645.28	9	PGRMC1	B7Z1L3; hsa:10857; O00264; Q9UGJ9	1	0.499	0.428993	88.7	139.4	60.6	28.78	86.77	1
Q9C075	Keratin, type I cytoskeletal 23 OS=Homo sapiens OX=9606 GN=KRT23 PE=1 SV=2	0	97.149	45	12	130	12	422	48.1	6.54	278.69	12	KRT23	A8K084; B7Z7J2; hsa:25984; I3L3Q6; Q9C075; Q9NUR6	0	1.001	0.975926	104.96	191.7	8.3	43.77	130.4	1	Acetyl [N-Term]
Q13867	Bleomycin hydrolase OS=Homo sapiens OX=9606 GN=BLMH PE=1 SV=1	0	97.103	24	8	301	8	455	52.5	6.27	515.77	8	BLMH	B2R796; hsa:642; Q13867; Q53F86; Q9UER9	0	1.555	0.978845	66.35	72.1	127.9	38.01	56.26	1
P02652	Apolipoprotein A-II OS=Homo sapiens OX=9606 GN=APOA2 PE=1 SV=1	0	97.089	72	10	692	10	100	11.2	6.62	1973.12	10	APOA2	B2R524; hsa:336; P02652	0	1.984	0.910953	111.05	61	139	43.44	121.38	1
Q9UJ70	N-acetyl-D-glucosamine kinase OS=Homo sapiens OX=9606 GN=NAGK PE=1 SV=4	0	97.029	48	12	549	12	344	37.4	6.24	1086.99	12	NAGK	B4DLZ5; hsa:55577; Q53HD5; Q6IA84; Q9BS29; Q9BVP0; Q9NV37; Q9UJ70	0	0.765	0.902921	51.41	104.1	95.9	22.35	19.18	1
Q5SSJ5	Heterochromatin protein 1-binding protein 3 OS=Homo sapiens OX=9606 GN=HP1BP3 PE=1 SV=1	0	97.027	35	17	325	17	553	61.2	9.67	595.94	17	HP1BP3	A6NI71; A8K5D7; B3KMZ8; B4E210; hsa:50809; Q05BI0; Q5SSJ5; Q5SSJ6; Q5SWC6; Q6PIM9; Q8NDF0; Q9UHY0	0	1.349	0.992504	75.02	96.7	103.3	48.02	42.43	1
Q9BXW7	Haloacid dehalogenase-like hydrolase domain-containing 5 OS=Homo sapiens OX=9606 GN=HDHD5 PE=1 SV=1	0	96.958	39	10	291	10	423	46.3	8.13	911.21	10	HDHD5	B2RCK5; hsa:27440; Q9BXW7; Q9BXW8; Q9NWA8; Q9NX41	0	1.491	0.980663	82.62	81.6	118.4	69.3	52.1	1
Q16658	Fascin OS=Homo sapiens OX=9606 GN=FSCN1 PE=1 SV=3	0	96.951	39	14	607	14	493	54.5	7.24	1133.42	14	FSCN1	A6NI89; B2RE97; hsa:6624; Q16658; Q96IC5; Q96IH1; Q9BRF1	0	0.739	0.885422	54.93	112.6	87.4	28.45	46.03	1
O75306	NADH dehydrogenase [ubiquinone] iron-sulfur protein 2, mitochondrial OS=Homo sapiens OX=9606 GN=NDUFS2 PE=1 SV=2	0	96.933	45	15	472	15	463	52.5	7.55	723.07	15	NDUFS2	D3DVG7; hsa:4720; J3KPM7; O75306; Q5VTW0; Q969P3; Q9UEV3	0	1.313	0.993844	62.88	89.1	110.9	33.14	48.31	1
Q04837	Single-stranded DNA-binding protein, mitochondrial OS=Homo sapiens OX=9606 GN=SSBP1 PE=1 SV=1	0	96.904	78	13	552	13	148	17.2	9.6	1199	13	SSBP1	hsa:6742; Q04837	0	2.903	0.51341	57.62	55.9	144.1	25.26	32.57	1
O75608	Acyl-protein thioesterase 1 OS=Homo sapiens OX=9606 GN=LYPLA1 PE=1 SV=1	0	96.897	60	8	418	8	230	24.7	6.77	1083.3	8	LYPLA1	hsa:10434; O43202; O75608; Q9UQF9	0	1.082	0.98901	84.67	90.5	109.5	11.46	33.47	1
Q9Y3F4	Serine-threonine kinase receptor-associated protein OS=Homo sapiens OX=9606 GN=STRAP PE=1 SV=1	0	96.823	43	12	434	12	350	38.4	5.12	792.42	12	STRAP	B2R5S5; B4DNJ6; hsa:11171; Q5TZT4; Q9NTK0; Q9UQC8; Q9Y3F4	0	1.838	0.940722	57.28	77.6	122.4	34.54	50.23	1
P04439	HLA class I histocompatibility antigen, A alpha chain OS=Homo sapiens OX=9606 GN=HLA-A PE=1 SV=2	0	96.755	48	12	647	5	365	40.8	6	1742.11	12	HLA-A	B1PKZ3; hsa:3105; O02939; O02954; O02955; O02963; O19509; O19546; O19598; O19605; O19606; O19619; O19647; O19673; O19687; O19695; O19756; O19794; O19795; O43906; O43907; O46874; O62921; O62924; O77937; O77938; O77964; O78073; O78171; O98009; O98010; O98011; O98137; P01891; P01892; P04439; P05534; P06338; P10313; P10314; P10315; P10316; P13746; P16188; P16189; P16190; P18462; P30443; P30444; P3044…	7	0.863	0.945498	75.46	100.8	99.2	27.17	44.45	1
Q15392	Delta(24)-sterol reductase OS=Homo sapiens OX=9606 GN=DHCR24 PE=1 SV=2	0	96.666	40	12	189	12	516	60.1	8.16	323.92	12	DHCR24	B7Z817; D3DQ51; hsa:1718; Q15392; Q9HBA8	0	2.014	0.908457	59.91	67.7	132.3	21.53	50.81	1
Q99447	Ethanolamine-phosphate cytidylyltransferase OS=Homo sapiens OX=9606 GN=PCYT2 PE=1 SV=1	0	96.605	43	12	436	12	389	43.8	6.92	890.51	12	PCYT2	B7Z7A5; B7ZAS0; F5H8B1; hsa:5833; Q6IBM3; Q96G08; Q99447	0	0.831	0.938291	105.85	103.6	96.4	34.84	79.46	1
P30566	Adenylosuccinate lyase OS=Homo sapiens OX=9606 GN=ADSL PE=1 SV=2	0	96.604	38	12	395	12	484	54.9	7.11	1071.61	12	ADSL	B0QY76; hsa:158; O75495; P30566; Q5TI34	0	2.616	0.643139	50.21	54.4	145.6	35.54	29.44	1	Met-loss+Acetyl [N-Term]
Q9Y230	RuvB-like 2 OS=Homo sapiens OX=9606 GN=RUVBL2 PE=1 SV=3	0	96.379	46	16	690	16	463	51.1	5.64	1540.25	16	RUVBL2	B3KQ59; E7ETE5; hsa:10856; Q6FIB9; Q6PK27; Q9Y230; Q9Y361	0	2.406	0.753197	68.72	63.8	136.2	22.24	32.16	1
P02763	Alpha-1-acid glycoprotein 1 OS=Homo sapiens OX=9606 GN=ORM1 PE=1 SV=2	0	96.173	38	9	363	8	201	23.5	5.11	663.84	9	ORM1	B7ZKQ5; hsa:5004; P02763; Q5T539; Q5U067; Q8TC16	1	1.261	0.998585	92.3	95.1	104.9	33.31	151.1	1
Q13617	Cullin-2 OS=Homo sapiens OX=9606 GN=CUL2 PE=1 SV=2	0	96.125	32	20	251	19	745	86.9	6.92	310.93	20	CUL2	B3KT95; B7Z6K8; D3DRY6; G3V1S2; hsa:8453; O00200; Q13617; Q5T2B6; Q9UNF9	0	1.365	0.992504	49.45	34.6	165.4	86.68	27.37	1
Q14738	Serine/threonine-protein phosphatase 2A 56 kDa regulatory subunit delta isoform OS=Homo sapiens OX=9606 GN=PPP2R5D PE=1 SV=1	0	96.122	39	16	372	11	602	69.9	8.13	478.79	16	PPP2R5D	A8K3I9; B5BUA6; hsa:5528; O00494; O00696; Q14738; Q15171; Q5TC39	5	2.126	0.877605	86.65	60	140	56.77	68.42	1
Q15363	Transmembrane emp24 domain-containing protein 2 OS=Homo sapiens OX=9606 GN=TMED2 PE=1 SV=1	0	96.068	24	4	305	4	201	22.7	5.17	1039.46	4	TMED2	hsa:10959; Q15363	0	1.049	0.984689	60.61	96.8	103.2	20.49	22.3	1
O94905	Erlin-2 OS=Homo sapiens OX=9606 GN=ERLIN2 PE=1 SV=1	0	96.06	48	15	614	13	339	37.8	5.62	1216.07	15	ERLIN2	A0JLQ1; A8K5S9; B4DM38; D3DSW0; hsa:11160; O94905; Q6NW21; Q86VS6; Q86W49	2	0.845	0.940848	63.19	115.4	84.6	12.01	44.78	1
P01042	Kininogen-1 OS=Homo sapiens OX=9606 GN=KNG1 PE=1 SV=2	0	95.89	28	14	388	14	644	71.9	6.81	729.17	14	KNG1	A8K474; B2RCR2; C9JEX1; hsa:3827; P01042; P01043; Q53EQ0; Q6PAU9; Q7M4P1	0	1.039	0.982038	46.44	92.8	107.2	20.53	57.71	1
P14780	Matrix metalloproteinase-9 OS=Homo sapiens OX=9606 GN=MMP9 PE=1 SV=3	0	95.882	27	14	124	14	707	78.4	6.06	231.29	14	MMP9	B2R7V9; hsa:4318; P14780; Q3LR70; Q8N725; Q9H4Z1; Q9UCJ9; Q9UCL1; Q9UDK2	0	1.083	0.963764	98.28	134.2	65.8	52.67	181.64	1
Q9NSD9	Phenylalanine--tRNA ligase beta subunit OS=Homo sapiens OX=9606 GN=FARSB PE=1 SV=3	0	95.795	28	13	418	13	589	66.1	6.84	750.74	13	FARSB	B4DFM0; hsa:10056; O95708; Q4ZFX1; Q57ZJ5; Q9NSD9; Q9NZZ6	0	2.057	0.896215	49.63	86.3	113.7	13.42	27.84	1
Q32P28	Prolyl 3-hydroxylase 1 OS=Homo sapiens OX=9606 GN=P3H1 PE=1 SV=2	0	95.78	29	13	210	13	736	83.3	5.14	384.19	13	P3H1	hsa:64175; Q32P28; Q7KZR4; Q96BR8; Q96SK8; Q96SL5; Q96SN3; Q9H6K3; Q9HC86; Q9HC87	0	2.224	0.822023	71.34	41.9	158.1	76.35	101.01	1
Q9Y6X4	Soluble lamin-associated protein of 75 kDa OS=Homo sapiens OX=9606 GN=FAM169A PE=1 SV=2	0	95.703	33	12	102	12	670	74.9	4.6	120.15	12	FAM169A	A8K1T9; hsa:26049; Q6MZT0; Q9H989; Q9Y6X4	0	2.575	0.581734	76.42	32.6	167.4	76.36	74.35	1	Met-loss+Acetyl [N-Term]
Q2TAA2	Isoamyl acetate-hydrolyzing esterase 1 homolog OS=Homo sapiens OX=9606 GN=IAH1 PE=1 SV=1	0	95.675	50	9	195	9	248	27.6	5.3	447.68	9	IAH1	B4DMV3; hsa:285148; Q2TAA2	0	1.278	0.998449	68.4	79.3	120.7	36.36	52.92	1
Q9UEY8	Gamma-adducin OS=Homo sapiens OX=9606 GN=ADD3 PE=1 SV=1	0	95.673	28	15	332	15	706	79.1	6.32	544.89	15	ADD3	D3DRA8; hsa:120; O43243; Q5VU09; Q92773; Q9UEY7; Q9UEY8	0	1.27	0.998585	62.36	75.4	124.6	23.16	32.44	1	Met-loss+Acetyl [N-Term]
O95758	Polypyrimidine tract-binding protein 3 OS=Homo sapiens OX=9606 GN=PTBP3 PE=1 SV=2	0	95.635	32	10	233	9	552	59.7	9.04	333.32	10	PTBP3	B1ALY2; B1ALY3; B1ALY5; B1ALY6; B3KME7; hsa:9991; O95758; Q68DB9; Q86YB3; Q86YH9	0	2.494	0.656732	74.08	40.7	159.3	66.27	28.95	1
Q92882	Osteoclast-stimulating factor 1 OS=Homo sapiens OX=9606 GN=OSTF1 PE=1 SV=2	0	95.572	54	10	396	10	214	23.8	5.68	933.75	10	OSTF1	hsa:26578; Q5W126; Q92882; Q96IJ4	0	0.867	0.945498	50.75	103.1	96.9	25.86	35.94	1	Met-loss+Acetyl [N-Term]
P28062	Proteasome subunit beta type-8 OS=Homo sapiens OX=9606 GN=PSMB8 PE=1 SV=3	0	95.533	43	9	467	9	276	30.3	7.43	1101.68	9	PSMB8	B0UZC0; hsa:5696; P28062; Q29824; Q5JNW6; Q5QNR8; Q96J48	0	0.737	0.885171	69.62	117.8	82.2	24.72	37.11	1
Q9BYX7	Putative beta-actin-like protein 3 OS=Homo sapiens OX=9606 GN=POTEKP PE=5 SV=1	0	95.499	29	6	2393	1	375	42	6.33	5922.71	6	POTEKP	Q562N5; Q9BYX7	0	0.775	0.698567	117.82	117.5	82.5	76.11	89.15	1
Q9H845	Complex I assembly factor ACAD9, mitochondrial OS=Homo sapiens OX=9606 GN=ACAD9 PE=1 SV=1	0	95.488	29	14	339	14	621	68.7	7.96	490.6	14	ACAD9	D3DNB8; hsa:28976; Q8WXX3; Q9H845	0	1.526	0.976786	64.86	80.7	119.3	24.77	47.61	1
P07108	Acyl-CoA-binding protein OS=Homo sapiens OX=9606 GN=DBI PE=1 SV=2	0	95.285	90	9	823	9	87	10	6.57	2073.08	9	DBI	B8ZWD2; B8ZWD6; B8ZWD7; hsa:1622; P07108; P08869; Q4VWZ6; Q53SQ7; Q6IB48; Q9UCI8	0	0.788	0.916313	93.74	124.3	75.7	27.28	76.08	1	Met-loss+Acetyl [N-Term]
O14936	Peripheral plasma membrane protein CASK OS=Homo sapiens OX=9606 GN=CASK PE=1 SV=3	0	95.279	22	16	138	16	926	105.1	6.43	164.9	16	CASK	A6NES1; B7ZKY0; hsa:8573; O14936; O43215; Q17RI4; Q59HA0; Q5VT16; Q5VT17; Q5VT18; Q5VT19; Q66T42; Q9BYH6; Q9NYB2; Q9NYB3	0	1.324	0.998585	64.25	106	94	29.22	76.2	1
Q9UI32	Glutaminase liver isoform, mitochondrial OS=Homo sapiens OX=9606 GN=GLS2 PE=1 SV=2	0	95.26	32	12	146	11	602	66.3	7.3	228.5	12	GLS2	B7Z8Q9; hsa:27165; Q8IX91; Q9NYY2; Q9UI31; Q9UI32	0	0.228	0.000654382	104.11	182.1	17.9	44.29	72.09	1
P09382	Galectin-1 OS=Homo sapiens OX=9606 GN=LGALS1 PE=1 SV=2	0	95.073	67	7	578	7	135	14.7	5.5	1359.19	7	LGALS1	B2R5E8; hsa:3956; P09382; Q9UDK5	0	1.138	0.992504	86.76	88.4	111.6	25.97	53.25	1	Met-loss+Acetyl [N-Term]
Q9UIJ7	GTP:AMP phosphotransferase AK3, mitochondrial OS=Homo sapiens OX=9606 GN=AK3 PE=1 SV=4	0	95.05	63	14	753	14	227	25.6	9.16	1411.95	14	AK3	B4DP58; D3DRI1; E7ET30; hsa:50808; Q5VYW6; Q9H576; Q9HC01; Q9NPB4; Q9UIJ7	0	0.713	0.867958	79.73	122.5	77.5	19.36	61.28	1
P06865	Beta-hexosaminidase subunit alpha OS=Homo sapiens OX=9606 GN=HEXA PE=1 SV=2	0	95.031	32	15	675	14	529	60.7	5.16	1092.92	15	HEXA	B4DKE7; E7ENH7; hsa:3073; P06865; Q53HS8; Q6AI32	0	1.289	0.996481	66.01	88	112	32.4	46.17	1
P56537	Eukaryotic translation initiation factor 6 OS=Homo sapiens OX=9606 GN=EIF6 PE=1 SV=1	0	94.825	61	10	413	10	245	26.6	4.68	817.04	10	EIF6	B7ZBG9; hsa:3692; P56537; Q6IBN8; Q96TD5	0	2.064	0.894036	58.57	53.7	146.3	28.08	38.28	1
Q16778	Histone H2B type 2-E OS=Homo sapiens OX=9606 GN=H2BC21 PE=1 SV=3	0	94.664	61	10	905	4	126	13.9	10.32	1900.34	10	H2BC21	A3KMC7; A8K110; hsa:8349; Q16778; Q4KMY1; Q5QNX0; Q9UE88	0	2.487	0.709369	86.35	61.9	138.1	29.63	44.44	1
Q16401	26S proteasome non-ATPase regulatory subunit 5 OS=Homo sapiens OX=9606 GN=PSMD5 PE=1 SV=3	0	94.627	38	16	537	16	504	56.2	5.48	975.16	16	PSMD5	B4DZM8; hsa:5711; Q15045; Q16401; Q4VXG8	0	1.139	0.992504	54.28	95.6	104.4	16.06	67.55	1	Met-loss+Acetyl [N-Term]
Q13155	Aminoacyl tRNA synthase complex-interacting multifunctional protein 2 OS=Homo sapiens OX=9606 GN=AIMP2 PE=1 SV=2	0	94.588	31	8	416	8	320	35.3	8.22	888.27	8	AIMP2	F8W950; hsa:7965; Q13155; Q75MR1; Q96CZ5; Q9P1L2	0	1.865	0.938291	49.6	70	130	23.62	23.84	1
Q9HAV0	Guanine nucleotide-binding protein subunit beta-4 OS=Homo sapiens OX=9606 GN=GNB4 PE=1 SV=3	0	94.367	63	13	353	7	340	37.5	6	904.21	13	GNB4	B3KMH5; D3DNR8; hsa:59345; Q9HAV0	0	0.691	0.510156	86.59	147.8	52.2	36.75	89.14	1	Met-loss+Acetyl [N-Term]
Q96JB5	CDK5 regulatory subunit-associated protein 3 OS=Homo sapiens OX=9606 GN=CDK5RAP3 PE=1 SV=2	0	94.3	36	16	432	16	506	56.9	4.75	812.34	16	CDK5RAP3	B7Z6N4; D3DTU1; D3DTU2; F5H3I5; hsa:80279; Q53FA2; Q96JB5; Q9H3F8; Q9H8G0; Q9HBR9	0	1.33	0.99383	47.19	88.1	111.9	27.96	28.56	1
P26373	60S ribosomal protein L13 OS=Homo sapiens OX=9606 GN=RPL13 PE=1 SV=4	0	94.236	43	10	679	10	211	24.2	11.65	1455.79	10	RPL13	B4DLX3; F5H1S2; hsa:6137; P26373; Q3KQT8; Q567Q8; Q9BPX0	0	1.919	0.924128	98.65	61.1	138.9	38.56	73.7	1
Q9BTY7	Protein HGH1 homolog OS=Homo sapiens OX=9606 GN=HGH1 PE=1 SV=1	0	94.231	63	15	219	15	390	42.1	4.81	447.97	15	HGH1	hsa:51236; P0CB43; Q9BTY7	0	1.661	0.963764	101.33	110	90	26.97	65.71	1	Met-loss+Acetyl [N-Term]
P38919	Eukaryotic initiation factor 4A-III OS=Homo sapiens OX=9606 GN=EIF4A3 PE=1 SV=4	0	94.181	34	13	512	11	411	46.8	6.73	1122.32	13	EIF4A3	hsa:9775; P38919; Q15033; Q6IBQ2; Q96A18	0	2.402	0.754096	51.03	43.7	156.3	43.15	26.15	1
Q14254	Flotillin-2 OS=Homo sapiens OX=9606 GN=FLOT2 PE=1 SV=2	0	94.147	39	14	566	14	428	47	5.25	1110.21	14	FLOT2	hsa:2319; Q14254	0	1.075	0.988183	53.58	95.8	104.2	26.33	44.25	1
Q9Y2Q3	Glutathione S-transferase kappa 1 OS=Homo sapiens OX=9606 GN=GSTK1 PE=1 SV=3	0	94.114	47	9	945	9	226	25.5	8.41	1916.7	9	GSTK1	B4DIH1; B4DSY2; hsa:373156; Q6P4H0; Q7Z520; Q9P1S4; Q9Y2Q3	0	0.897	0.956013	53.73	112.6	87.4	19.77	29.57	1
O43776	Asparagine--tRNA ligase, cytoplasmic OS=Homo sapiens OX=9606 GN=NARS1 PE=1 SV=1	0	93.903	32	13	502	13	548	62.9	6.25	900.1	13	NARS1	B4DG16; hsa:4677; O43776; Q53GU6	0	2.567	0.670497	51.44	37.2	162.8	34.73	31.11	1	Met-loss [N-Term]
P28288	ATP-binding cassette sub-family D member 3 OS=Homo sapiens OX=9606 GN=ABCD3 PE=1 SV=1	0	93.709	21	14	440	14	659	75.4	9.36	852.47	14	ABCD3	D3DT46; hsa:5825; P28288; Q15271; Q6NUN5; Q96DA3; Q9H529	0	0.993	0.975926	65.14	92.8	107.2	22.1	22.21	1
P11172	Uridine 5'-monophosphate synthase OS=Homo sapiens OX=9606 GN=UMPS PE=1 SV=1	0	93.703	40	14	258	14	480	52.2	7.24	415.21	14	UMPS	B5LY68; B5LY72; hsa:7372; O00758; O00759; O00760; P11172; Q16862; Q9H3Q2; Q9UG49	0	1.634	0.966611	66.79	89.5	110.5	45.88	54.95	1
P20073	Annexin A7 OS=Homo sapiens OX=9606 GN=ANXA7 PE=1 SV=3	0	93.685	27	12	546	12	488	52.7	5.68	1235.54	12	ANXA7	hsa:310; P20073; Q5F2H3; Q5T0M6; Q5T0M7	0	1.217	0.998585	55.1	88.5	111.5	14.17	35.14	1
P55036	26S proteasome non-ATPase regulatory subunit 4 OS=Homo sapiens OX=9606 GN=PSMD4 PE=1 SV=1	0	93.684	34	9	546	9	377	40.7	4.79	1258.3	9	PSMD4	D3DV16; hsa:5710; P55036; Q5VWC5; Q9NS92	0	1.885	0.932285	49.22	67.2	132.8	18.23	39.09	1
O43708	Maleylacetoacetate isomerase OS=Homo sapiens OX=9606 GN=GSTZ1 PE=1 SV=3	0	93.61	50	11	421	11	216	24.2	8.54	819.82	11	GSTZ1	A6NED0; A6NNB8; A8MWD7; B2RCK3; hsa:2954; O15308; O43708; O75430; Q6IB17; Q7Z610; Q9BV63	0	0.467	0.345638	88.36	173.7	26.3	48.11	85.05	1	Acetyl [N-Term]
P29350	Tyrosine-protein phosphatase non-receptor type 6 OS=Homo sapiens OX=9606 GN=PTPN6 PE=1 SV=1	0	93.344	38	17	329	17	595	67.5	7.78	524.66	17	PTPN6	A8K306; G3V0F8; hsa:5777; P29350; Q969V8; Q9UK67	0	0.906	0.957664	52.79	123.4	76.6	25.2	34.11	1
Q9NX40	OCIA domain-containing protein 1 OS=Homo sapiens OX=9606 GN=OCIAD1 PE=1 SV=1	0	93.237	47	12	444	12	245	27.6	7.49	926.73	12	OCIAD1	C9K030; G8JLN7; hsa:54940; Q9BZE8; Q9NX40	0	1.234	0.999211	92.14	98.1	101.9	28.36	72.76	1
P46109	Crk-like protein OS=Homo sapiens OX=9606 GN=CRKL PE=1 SV=1	0	93.079	62	12	495	12	303	33.8	6.74	779.28	12	CRKL	A8KA44; D3DX35; hsa:1399; P46109	0	2.091	0.883208	55.5	58.4	141.6	35.78	26.94	1
P33241	Lymphocyte-specific protein 1 OS=Homo sapiens OX=9606 GN=LSP1 PE=1 SV=1	0	93.015	57	11	178	11	339	37.2	4.74	338.5	11	LSP1	B3KPP1; B3KRR6; E9PBV6; E9PFP3; hsa:4046; P33241; Q16096; Q53H48; Q6FHM3; Q9BUY8	0	1.32	0.99383	78.53	94.7	105.3	51.65	64.33	1	Met-loss+Acetyl [N-Term]
Q15008	26S proteasome non-ATPase regulatory subunit 6 OS=Homo sapiens OX=9606 GN=PSMD6 PE=1 SV=1	0	92.975	42	16	423	16	389	45.5	5.62	749.04	16	PSMD6	A8K2E0; E9PHI9; hsa:9861; Q15008; Q6UV22	0	1.625	0.968009	43.48	75.4	124.6	18.64	16.63	1	Met-loss [N-Term]
P84243	Histone H3.3 OS=Homo sapiens OX=9606 GN=H3-3B PE=1 SV=2	0	92.968	61	12	718	1	136	15.3	11.27	1698.62	12	H3-3A; H3-3B	hsa:3020; hsa:3021; P06351; P33155; P84243; Q5VV55; Q5VV56; Q66I33; Q9V3W4	0	1.791	0.945498	57.32	71.8	128.2	55.22	21.49	1
Q71DI3	Histone H3.2 OS=Homo sapiens OX=9606 GN=H3C13 PE=1 SV=3	0	92.95	61	12	711	1	136	15.4	11.27	1595.81	12	H3C13; H3C14; H3C15	A2BDF6; A6NFS4; hsa:126961; hsa:333932; hsa:653604; Q6B053; Q71DI3	0	10.464	6.74554e-06	43.5	17.4	182.6		48.66	1
Q9Y2B0	Protein canopy homolog 2 OS=Homo sapiens OX=9606 GN=CNPY2 PE=1 SV=1	0	92.861	60	11	574	11	182	20.6	4.92	1267.76	11	CNPY2	B2R7B9; hsa:10330; Q9UHE9; Q9Y2B0	0	1.638	0.966611	56.66	71.4	128.6	21.46	36.42	1
Q5JTV8	Torsin-1A-interacting protein 1 OS=Homo sapiens OX=9606 GN=TOR1AIP1 PE=1 SV=2	0	92.847	30	11	455	11	583	66.2	8.18	865.57	11	TOR1AIP1	A0A0A0MSK5; A8K630; B0QZ57; hsa:26092; Q5JTV6; Q5JTV8; Q8IZ65; Q9H8Y6; Q9HAJ1; Q9NV52; Q9Y3X5	0	2.078	0.885993	66.14	55.4	144.6	49.78	37.33	1
Q6PGP7	Tetratricopeptide repeat protein 37 OS=Homo sapiens OX=9606 GN=TTC37 PE=1 SV=1	0	92.837	16	17	201	17	1564	175.4	7.53	176.24	17	SKIC3	hsa:9652; O15077; Q6PGP7; Q6PJI3	0	1.253	0.999975	66.04	79.7	120.3	32.29	31.5	1
Q8IZ83	Aldehyde dehydrogenase family 16 member A1 OS=Homo sapiens OX=9606 GN=ALDH16A1 PE=1 SV=2	0	92.728	26	12	489	12	802	85.1	6.79	933.27	12	ALDH16A1	B4DLQ1; C9JBH6; hsa:126133; Q86YF0; Q8IYL4; Q8IZ83; Q8TEI8	0	1.089	0.98901	69.51	108.6	91.4	28.1	59.25	1
P39748	Flap endonuclease 1 OS=Homo sapiens OX=9606 GN=FEN1 PE=1 SV=1	0	92.568	43	9	241	9	380	42.6	8.62	415.97	9	FEN1	hsa:2237; P39748	0	2.328	0.759693	87.73	16.8	183.2	116.34	44.69	1
P18283	Glutathione peroxidase 2 OS=Homo sapiens OX=9606 GN=GPX2 PE=1 SV=3	0	92.509	63	11	242	11	190	21.9	7.78	323.39	11	GPX2	hsa:2877; P18283; Q6PJ52; Q8WWI7; Q9NRP9	0	1.105	0.984689	77.28	106.6	93.4	62.23	82.36	1
P55327	Tumor protein D52 OS=Homo sapiens OX=9606 GN=TPD52 PE=1 SV=2	0	92.501	63	11	485	11	224	24.3	4.83	1015.73	11	TPD52	B7Z414; C9J502; D0UFD1; D0UFD2; D0UFD3; D0UFD4; D0UFD5; E5RKB4; hsa:7163; P55327; Q13056; Q53EK8; Q6FGP3; Q6FGS3; Q86YZ2; Q9UCX8	0	3.18	0.390473	101.11	33.8	166.2	80.97	67.79	1
O75170	Serine/threonine-protein phosphatase 6 regulatory subunit 2 OS=Homo sapiens OX=9606 GN=PPP6R2 PE=1 SV=2	0	92.362	25	12	145	12	966	104.9	4.87	281.81	12	PPP6R2	A6PVG3; B7Z7T3; hsa:9701; O75170; Q5U5P3; Q7Z2L2; Q7Z5G5; Q7Z731; Q9UGB9	0	1.819	0.945498	56.77	83.5	116.5	31.16	81.03	1
Q9UQ35	Serine/arginine repetitive matrix protein 2 OS=Homo sapiens OX=9606 GN=SRRM2 PE=1 SV=2	0	92.35	10	16	184	16	2752	299.4	12.06	298.19	16	SRRM2	A6NKB9; D3DU97; hsa:23524; O15038; O94803; Q6NSL3; Q6PIM3; Q6PK40; Q8IW17; Q96GY7; Q9P0G1; Q9UHA8; Q9UQ35; Q9UQ36; Q9UQ37; Q9UQ38; Q9UQ40	0	1.85	0.938291	91.76	107.3	92.7	35.25	65.22	1
P52888	Thimet oligopeptidase OS=Homo sapiens OX=9606 GN=THOP1 PE=1 SV=2	0	92.341	32	17	427	17	689	78.8	6.05	709.33	17	THOP1	B3KSE2; hsa:7064; P52888; Q9UCB3	0	1.306	0.995273	68.54	67.8	132.2	41.44	44.87	1	Met-loss [N-Term]
P30050	60S ribosomal protein L12 OS=Homo sapiens OX=9606 GN=RPL12 PE=1 SV=1	0	92.287	59	7	812	7	165	17.8	9.42	2316.37	7	RPL12	hsa:6136; P30050; Q5VVV2; Q6PB27	0	1.503	0.980663	63.88	91	109	12.31	36.9	1
P12830	Cadherin-1 OS=Homo sapiens OX=9606 GN=CDH1 PE=1 SV=3	0	92.202	25	11	238	11	882	97.4	4.73	345.26	11	CDH1	A8K1U7; hsa:999; P12830; Q13799; Q14216; Q15855; Q16194; Q4PJ14; Q9UII8	0	1.01	0.978461	75.73	105.5	94.5	38.6	70.14	1
P31947	14-3-3 protein sigma OS=Homo sapiens OX=9606 GN=SFN PE=1 SV=1	0	92.142	54	11	462	9	248	27.8	4.74	749.47	11	SFN	hsa:2810; P31947; Q6FH30; Q6FH51; Q96DH0	0	4.307	0.108198	106.05	17.5	182.5	122.13	95.21	1
P54619	5'-AMP-activated protein kinase subunit gamma-1 OS=Homo sapiens OX=9606 GN=PRKAG1 PE=1 SV=1	0	92.052	57	14	388	14	331	37.6	6.92	699.54	14	PRKAG1	B4DDT7; hsa:5571; P54619; Q8N7V9	0	0.86	0.94504	78.85	146.5	53.5	37.67	71.64	1	Acetyl [N-Term]
Q16777	Histone H2A type 2-C OS=Homo sapiens OX=9606 GN=H2AC20 PE=1 SV=4	0	92.051	61	7	748	4	129	14	10.9	1632.62	7	H2AC20	hsa:8338; Q16777; Q6DRA7; Q8IUE5	3	2.203	0.846188	84.96	67	133	24.28	44.32	1
Q96SQ9	Cytochrome P450 2S1 OS=Homo sapiens OX=9606 GN=CYP2S1 PE=1 SV=2	0	92.004	30	10	89	10	504	55.8	8.62	160.68	10	CYP2S1	hsa:29785; Q96SQ9; Q9BZ66	0	2.705	0.548177	69.81	59.8	140.2	60.29	171.39	1
Q9Y2S2	Lambda-crystallin homolog OS=Homo sapiens OX=9606 GN=CRYL1 PE=1 SV=3	0	92.003	48	10	755	10	319	35.4	6.18	1807.56	10	CRYL1	A0PJ43; B3KN92; hsa:51084; Q0VDI1; Q7Z4Z9; Q9P0G7; Q9Y2S2	0	0.38	0.147229	82.46	152.4	47.6	32.66	52.59	1
Q9HC38	Glyoxalase domain-containing protein 4 OS=Homo sapiens OX=9606 GN=GLOD4 PE=1 SV=1	0	91.922	46	13	653	13	313	34.8	5.6	1154.15	13	GLOD4	D3DTG9; D3DTH1; hsa:51031; Q96B89; Q9H3J8; Q9HC37; Q9HC38; Q9NVN1	0	0.898	0.956013	64.99	105.4	94.6	25.51	52.59	1
O43809	Cleavage and polyadenylation specificity factor subunit 5 OS=Homo sapiens OX=9606 GN=NUDT21 PE=1 SV=1	0	91.902	50	7	328	7	227	26.2	8.82	670.07	7	NUDT21	hsa:11051; O43809; Q6IB85; Q6NE84	0	1.947	0.916313	66.97	59.4	140.6	36.65	37.33	1
Q9Y281	Cofilin-2 OS=Homo sapiens OX=9606 GN=CFL2 PE=1 SV=1	0	91.866	70	10	742	7	166	18.7	7.88	1693.69	10	CFL2	G3V5P4; hsa:1073; Q9Y281	0	0.746	0.896215	72.86	129.2	70.8	22.14	69.67	1	Met-loss+Acetyl [N-Term]
P07910	Heterogeneous nuclear ribonucleoproteins C1/C2 OS=Homo sapiens OX=9606 GN=HNRNPC PE=1 SV=4	0	91.745	36	9	792	9	306	33.7	5.08	1754.28	9	HNRNPC	D3DS19; D3DS22; hsa:3183; P07910; P22628; Q53EX2; Q59FD3; Q5FWE8; Q86SF8; Q86U45; Q96HK7; Q96HM4; Q96IY5; Q9BTS3	0	2.347	0.774143	49.06	54.9	145.1	49.8	30.35	1
Q14151	Scaffold attachment factor B2 OS=Homo sapiens OX=9606 GN=SAFB2 PE=1 SV=1	0	91.673	18	11	346	4	953	107.4	6.16	804.55	11	SAFB2	B4DKG3; hsa:9667; Q14151; Q8TB13	0	1.515	0.98901	35.42	81.9	118.1	53.11	34.07	1	Met-loss+Acetyl [N-Term]
P14317	Hematopoietic lineage cell-specific protein OS=Homo sapiens OX=9606 GN=HCLS1 PE=1 SV=3	0	91.66	30	11	329	11	486	54	4.81	975.05	11	HCLS1	B4DQ69; hsa:3059; P14317; Q53Y93; Q6IBK9; Q9UDK0	0	0.656	0.774143	86.47	127	73	14.37	33.27	1
Q7L014	Probable ATP-dependent RNA helicase DDX46 OS=Homo sapiens OX=9606 GN=DDX46 PE=1 SV=2	0	91.639	23	20	476	20	1031	117.3	9.29	690.36	20	DDX46	hsa:9879; O94894; Q7L014; Q96EI0; Q9Y658	0	2.026	0.897282	73.46	92.1	107.9	35.01	37.56	1
Q16543	Hsp90 co-chaperone Cdc37 OS=Homo sapiens OX=9606 GN=CDC37 PE=1 SV=1	0	91.538	42	12	465	12	378	44.4	5.25	872.1	12	CDC37	hsa:11140; Q16543; Q53YA2	0	1.708	0.956562	54.36	80.8	119.2	39.02	23.69	1	Met-loss+Acetyl [N-Term]
Q96DG6	Carboxymethylenebutenolidase homolog OS=Homo sapiens OX=9606 GN=CMBL PE=1 SV=1	0	91.39	46	11	480	11	245	28	7.18	944.89	11	CMBL	D3DTC7; hsa:134147; Q8TED6; Q96DG6	0	0.607	0.683452	89.92	129.8	70.2	51.23	66.24	1
Q14126	Desmoglein-2 OS=Homo sapiens OX=9606 GN=DSG2 PE=1 SV=2	0	91.329	14	10	248	10	1118	122.2	5.24	310.01	10	DSG2	hsa:1829; Q14126; Q4KKU6	0	1.382	0.992504	61.43	75.9	124.1	33.32	45.27	1
P18583	Protein SON OS=Homo sapiens OX=9606 GN=SON PE=1 SV=4	0	91.314	14	20	343	20	2426	263.7	5.64	413.4	20	SON	D3DSF5; D3DSF6; E7ETE8; E7EU67; E7EVW3; E9PFQ2; hsa:6651; O14487; O95981; P18583; Q14120; Q6PKE0; Q9H7B1; Q9P070; Q9P072; Q9UKP9; Q9UPY0	0	1.563	0.976786	59.82	58.9	141.1	45.84	27.59	1	Met-loss+Acetyl [N-Term]
P10586	Receptor-type tyrosine-protein phosphatase F OS=Homo sapiens OX=9606 GN=PTPRF PE=1 SV=2	0	91.289	18	21	160	19	1907	212.7	6.3	183.55	21	PTPRF	D3DPX6; D3DPX7; hsa:5792; P10586; Q5T021; Q5T022; Q5W9G2; Q86WS0	2	1.725	0.957664	57.21	53.2	146.8	42.6	50.78	1
P22413	Ectonucleotide pyrophosphatase/phosphodiesterase family member 1 OS=Homo sapiens OX=9606 GN=ENPP1 PE=1 SV=2	0	91.276	21	11	205	11	925	104.9	7.14	472.35	11	ENPP1	hsa:5167; P22413; Q5T9R6; Q9NPZ3; Q9P1P6; Q9UP61; Q9Y6K3	0	1.206	0.996481	78.17	133.5	66.5	46.97	85.1	1
Q9UMX0	Ubiquilin-1 OS=Homo sapiens OX=9606 GN=UBQLN1 PE=1 SV=2	0	91.267	34	10	187	7	589	62.5	5.11	458.14	10	UBQLN1	A0A024R284; hsa:29979; Q5T6J5; Q5T6J9; Q8IXS9; Q8N2Q3; Q9H0T8; Q9H3R4; Q9HAZ5; Q9UMX0	2	1.682	0.968009	94.2	26.2	173.8	59.62	74.35	1	Met-loss+Acetyl [N-Term]
P54727	UV excision repair protein RAD23 homolog B OS=Homo sapiens OX=9606 GN=RAD23B PE=1 SV=1	0	91.156	40	12	512	10	409	43.1	4.84	1200.71	12	RAD23B	B3KWK8; G5E9P0; hsa:5887; P54727; Q7Z5K8; Q8WUB0	2	1.672	0.961492	81.25	67.5	132.5	31.66	59.08	1
Q5JWF2	Guanine nucleotide-binding protein G(s) subunit alpha isoforms XLas OS=Homo sapiens OX=9606 GN=GNAS PE=1 SV=2	0	91.043	16	12	667	11	1037	111	5.03	1182.91	12	GNAS	A2A2S3; E1P5G3; O75684; O75685; Q5JW67; Q5JWF1; Q5JWF2; Q9NY42	0	0.868	0.945498	66.54	109.4	90.6	87.39	38.95	1
Q8IW45	ATP-dependent (S)-NAD(P)H-hydrate dehydratase OS=Homo sapiens OX=9606 GN=NAXD PE=1 SV=1	0	91.039	46	11	302	11	347	36.6	8.06	650.04	11	NAXD	B4DXT4; hsa:55739; Q5T9X3; Q8IW45; Q9H7W1; Q9NVF5	0	0.757	0.837154	110.53	136.4	63.6	19.84	128.73	1
Q9UNZ2	NSFL1 cofactor p47 OS=Homo sapiens OX=9606 GN=NSFL1C PE=1 SV=2	0	90.949	40	12	520	12	370	40.5	5.1	1153.01	12	NSFL1C	A2A2L1; B2RD74; hsa:55968; Q5JXA4; Q5JXA5; Q7Z533; Q9H102; Q9NVL9; Q9UI06; Q9UNZ2	0	1.717	0.956013	57.41	70	130	24.68	35.15	1
Q92878	DNA repair protein RAD50 OS=Homo sapiens OX=9606 GN=RAD50 PE=1 SV=1	0	90.903	18	20	187	20	1312	153.8	6.89	204.09	20	RAD50	B9EGF5; hsa:10111; O43254; Q6GMT7; Q6P5X3; Q92878; Q9UP86	0	1.238	0.998585	58.44	73.5	126.5	36.19	42.3	1
P61086	Ubiquitin-conjugating enzyme E2 K OS=Homo sapiens OX=9606 GN=UBE2K PE=1 SV=3	0	90.815	71	13	310	13	200	22.4	5.44	607.06	13	UBE2K	A6NJC1; A8K5Y9; B2RDF8; C9JGP1; hsa:3093; O54806; P27924; P61086; Q16721; Q9CVV9; Q9Y2D3	0	1.625	0.968009	96.37	109.4	90.6	21.26	71.29	1	Met-loss+Acetyl [N-Term]
P60903	Protein S100-A10 OS=Homo sapiens OX=9606 GN=S100A10 PE=1 SV=2	0	90.745	61	7	712	7	97	11.2	7.37	2121.27	7	S100A10	A8K4V8; hsa:6281; P08206; P60903; Q5T1C5	0	1.73	0.954646	93.62	74.7	125.3	44.77	73.36	1	Met-loss [N-Term]
P62328	Thymosin beta-4 OS=Homo sapiens OX=9606 GN=TMSB4X PE=1 SV=2	0	90.594	80	6	668	6	44	5.1	5.06	1680.09	6	TMSB4X	hsa:7114; P01253; P01254; P62328; Q546P5; Q63576; Q9UE55	0	0.918	0.961492	88.21	109.7	90.3	45.89	62.07	1	Met-loss+Acetyl [N-Term]
Q86WA6	Valacyclovir hydrolase OS=Homo sapiens OX=9606 GN=BPHL PE=1 SV=1	0	90.582	52	10	503	10	291	32.5	9.14	1236.75	10	BPHL	hsa:670; Q00306; Q13855; Q3KP51; Q86WA6	0	1.084	0.98901	72.66	107.1	92.9	24.67	63.73	1
P24534	Elongation factor 1-beta OS=Homo sapiens OX=9606 GN=EEF1B2 PE=1 SV=3	0	90.513	59	8	574	7	225	24.7	4.67	1393.54	8	EEF1B2	A8K795; hsa:1933; P24534; Q6IBH9	0	2.546	0.678203	59.69	64.9	135.1	13.37	38.15	1
Q5K4L6	Long-chain fatty acid transport protein 3 OS=Homo sapiens OX=9606 GN=SLC27A3 PE=1 SV=4	0	90.457	32	12	156	12	683	73.5	7.09	295.73	12	SLC27A3	hsa:11000; Q5K4L6; Q5VUQ7; Q5VUQ8; Q5VUR3; Q6ZV16; Q8N2X7; Q8TEJ0; Q96SW5; Q9BTJ5; Q9BTY5	0	1.196	0.98901	90.88	75.8	124.2	85.11	105.18	1
Q92667	A-kinase anchor protein 1, mitochondrial OS=Homo sapiens OX=9606 GN=AKAP1 PE=1 SV=1	0	90.38	21	13	234	13	903	97.3	4.94	569.15	13	AKAP1	A8K8Q1; D3DTZ0; hsa:8165; Q13320; Q92667; Q9BW14	0	1.767	0.953254	67.24	43.5	156.5	40.18	47.2	1
P20774	Mimecan OS=Homo sapiens OX=9606 GN=OGN PE=1 SV=1	0	90.336	25	7	389	7	298	33.9	5.63	684.26	7	OGN	hsa:4969; P20774; Q6FIB0; Q9UF90; Q9UNK5	0	0.407	0.197596	85.85	138.9	61.1	26.81	140.82	1
P52789	Hexokinase-2 OS=Homo sapiens OX=9606 GN=HK2 PE=1 SV=2	0	90.28	23	18	140	15	917	102.3	6.05	242.74	18	HK2	D6W5J2; hsa:3099; P52789; Q8WU87; Q9UN82	3	1.464	0.984689	86.24	81	119	11.37	14.44	1
P20042	Eukaryotic translation initiation factor 2 subunit 2 OS=Homo sapiens OX=9606 GN=EIF2S2 PE=1 SV=2	0	90.103	35	13	407	13	333	38.4	5.8	627.7	13	EIF2S2	hsa:8894; P20042; Q9BVU0; Q9UJE4	0	2.208	0.846609	46.64	50.9	149.1	43.35	29.09	1
P13073	Cytochrome c oxidase subunit 4 isoform 1, mitochondrial OS=Homo sapiens OX=9606 GN=COX4I1 PE=1 SV=1	0	90.08	44	12	944	12	169	19.6	9.51	1843.13	12	COX4I1	B2R4J2; D3DUM7; hsa:1327; P13073; Q6P666	0	0.684	0.822384	50.76	121.2	78.8	19.22	29.02	1
P61019	Ras-related protein Rab-2A OS=Homo sapiens OX=9606 GN=RAB2A PE=1 SV=1	0	90.011	72	12	655	12	212	23.5	6.54	1501.07	12	RAB2A	B2R5W8; B4DMQ5; hsa:5862; P08886; P61019	0	1.594	0.972752	54.34	66	134	42.05	30.81	1	Met-loss+Acetyl [N-Term]
Q6NZI2	Caveolae-associated protein 1 OS=Homo sapiens OX=9606 GN=CAVIN1 PE=1 SV=1	0	89.969	41	15	334	15	390	43.5	5.6	560.38	15	CAVIN1	B2RAW7; hsa:284119; O00535; Q6GMY1; Q6NZI2; Q96H74; Q9BT85; Q9HAP4	0	1.024	0.980663	71.96	90	110	33.99	19.57	1	Acetyl [N-Term]
P01889	HLA class I histocompatibility antigen, B alpha chain OS=Homo sapiens OX=9606 GN=HLA-B PE=1 SV=3	0	89.94	33	9	565	4	362	40.4	5.85	1582.3	9	HLA-B	A0A2I6Q7B5; B0V0B8; G3GN01; hsa:3106; O02862; O02956; O02957; O02960; O19555; O19556; O19595; O19615; O19624; O19625; O19627; O19641; O19651; O19675; O19692; O19758; O19779; O19783; O46702; O62897; O62901; O62915; O62917; O62919; O77933; O77959; O78053; O78138; O78160; O78163; O78172; O78173; O78180; O78217; O95730; O98140; P01889; P01890; P03989; P10317; P10318; P10319; P10320; P18463; P18464; P…	0	0.495	0.396175	80.92	133.7	66.3	43.54	70.38	1
P24539	ATP synthase F(0) complex subunit B1, mitochondrial OS=Homo sapiens OX=9606 GN=ATP5PB PE=1 SV=2	0	89.926	39	13	561	13	256	28.9	9.36	1183.41	13	ATP5PB	hsa:515; P24539; Q9BQ68; Q9BRU8	0	0.888	0.954234	70.38	97.5	102.5	15.05	35.56	1
Q09028	Histone-binding protein RBBP4 OS=Homo sapiens OX=9606 GN=RBBP4 PE=1 SV=3	0	89.782	55	11	407	8	425	47.6	4.89	772.21	11	RBBP4	B2R6G9; B4DRH0; D3DPQ3; hsa:5928; P31149; Q09028; Q53H02; Q96BV9	0	2.07	0.889925	69.81	57.1	142.9	51	34.28	1	Met-loss+Acetyl [N-Term]
Q14596	Next to BRCA1 gene 1 protein OS=Homo sapiens OX=9606 GN=NBR1 PE=1 SV=3	0	89.527	24	12	53	12	966	107.3	5.12	130.66	12	NBR1	hsa:4077; Q13173; Q14596; Q15026; Q5J7Q8; Q96GB6; Q9NRF7	0	1.512	0.9904	67.53	83	117	39.16	152.48	1
Q9Y3A6	Transmembrane emp24 domain-containing protein 5 OS=Homo sapiens OX=9606 GN=TMED5 PE=1 SV=1	0	89.421	30	7	499	7	229	26	4.84	858.33	7	TMED5	B1AKT4; B2R703; D3DT38; hsa:50999; Q96AX8; Q9Y3A6	0	1.18	0.995883	40.81	84.6	115.4	19.43	18.65	1
P07203	Glutathione peroxidase 1 OS=Homo sapiens OX=9606 GN=GPX1 PE=1 SV=4	0	88.984	61	11	724	11	203	22.1	6.55	1264.8	11	GPX1	E9PAS1; hsa:2876; P07203; Q7Z5H1; Q9BW12	0	0.565	0.59304	67.04	137.6	62.4	37.77	50.75	1
O75947	ATP synthase subunit d, mitochondrial OS=Homo sapiens OX=9606 GN=ATP5PD PE=1 SV=3	0	88.936	67	10	500	10	161	18.5	5.3	1064.87	10	ATP5PD	B2R5L6; hsa:10476; O75947; Q9H3J4	0	0.81	0.928554	51.13	118.3	81.7	19.52	48.68	1
P61247	40S ribosomal protein S3a OS=Homo sapiens OX=9606 GN=RPS3A PE=1 SV=2	0	88.893	50	13	442	13	264	29.9	9.73	769.16	13	RPS3A	B2R4D4; D3DP05; hsa:6189; P33443; P49241; P61247	0	1.932	0.919583	80.93	64.9	135.1	38.78	54.64	1
P35268	60S ribosomal protein L22 OS=Homo sapiens OX=9606 GN=RPL22 PE=1 SV=2	0	88.869	63	8	385	8	128	14.8	9.19	1120.2	8	RPL22	B2R495; hsa:6146; P35268; Q6IBD1	0	1.897	0.928734	57.29	67.2	132.8	11.69	41.93	1
Q53H82	Endoribonuclease LACTB2 OS=Homo sapiens OX=9606 GN=LACTB2 PE=1 SV=2	0	88.833	47	10	433	10	288	32.8	6.8	730.83	10	LACTB2	A8K2D6; hsa:51110; Q53H82; Q9Y392	0	1.099	0.9904	71.97	105.8	94.2	21.35	70.84	1
P48147	Prolyl endopeptidase OS=Homo sapiens OX=9606 GN=PREP PE=1 SV=2	0	88.73	29	17	571	17	710	80.6	5.86	862.74	17	PREP	hsa:5550; P48147; Q8N6D4	0	1.688	0.957664	68.14	60.2	139.8	37.31	37.75	1	Acetyl [N-Term]
Q13619	Cullin-4A OS=Homo sapiens OX=9606 GN=CUL4A PE=1 SV=3	0	88.661	30	19	172	12	759	87.6	8.13	199.83	19	CUL4A	A2A2W2; hsa:8451; O75834; Q13619; Q589T6; Q5TC62; Q6UP08; Q9UP17	6	1.201	0.998449	83	123.8	76.2	15.74	75.63	1
Q9ULV4	Coronin-1C OS=Homo sapiens OX=9606 GN=CORO1C PE=1 SV=1	0	88.59	33	13	367	13	474	53.2	7.08	723.4	13	CORO1C	A7MAP0; A7MAP1; B3KU12; hsa:23603; Q9NSK5; Q9ULV4	0	1.371	0.992504	69.21	82.2	117.8	29.39	53.53	1
P07357	Complement component C8 alpha chain OS=Homo sapiens OX=9606 GN=C8A PE=1 SV=2	0	88.587	29	10	188	10	584	65.1	6.47	375.51	10	C8A	A2RUI4; A2RUI5; hsa:731; P07357; Q13668; Q9H130	0	1.064	0.984689	71.81	121.9	78.1	17.96	49.54	1
Q6PI48	Aspartate--tRNA ligase, mitochondrial OS=Homo sapiens OX=9606 GN=DARS2 PE=1 SV=1	0	88.57	28	12	437	12	645	73.5	8.02	588.98	12	DARS2	hsa:55157; Q6PI48	0	2.972	0.484512	63.54	23.9	176.1	57.61	46.78	1
Q96K76	Ubiquitin carboxyl-terminal hydrolase 47 OS=Homo sapiens OX=9606 GN=USP47 PE=1 SV=3	0	88.528	17	18	201	18	1375	157.2	5.08	251.5	18	USP47	B3KXF5; E9PM46; hsa:55031; Q658U0; Q86Y73; Q8TEP6; Q96K76; Q9BWI0; Q9NWN1	0	1.493	0.980663	50.11	78	122	20.86	40.64	1
P69892	Hemoglobin subunit gamma-2 OS=Homo sapiens OX=9606 GN=HBG2 PE=1 SV=2	0	88.435	78	10	5899	1	147	16.1	7.2	10773.8	10	HBG2	A8MZE0; hsa:3048; P02096; P62027; P69892; Q14491; Q68NH9; Q96FH6; Q96FH7	0	0.68	0.548177	91.23	115.6	84.4	67.95	61.86	1
P48047	ATP synthase subunit O, mitochondrial OS=Homo sapiens OX=9606 GN=ATP5PO PE=1 SV=1	0	88.404	64	10	866	10	213	23.3	9.96	1631.79	10	ATP5PO	B2R4E2; hsa:539; P48047; Q5U042; Q6IBI2	0	1.003	0.975926	65.84	98.3	101.7	18.71	30.62	1
P30154	Serine/threonine-protein phosphatase 2A 65 kDa regulatory subunit A beta isoform OS=Homo sapiens OX=9606 GN=PPP2R1B PE=1 SV=3	0	88.348	23	13	272	6	601	66.2	4.94	543.02	13	PPP2R1B	A8MY67; B0YJ69; B4DGQ6; B4DK91; B4DWW5; F8W8G1; hsa:5519; O75620; P30154; Q8NHV8	0	1.14	0.975926	118.09	145.5	54.5	55.25	93.93	1
Q9H3U1	Protein unc-45 homolog A OS=Homo sapiens OX=9606 GN=UNC45A PE=1 SV=1	0	88.342	19	14	302	14	944	103	6.07	461.89	14	UNC45A	A8K6F7; hsa:55898; Q7L3Y6; Q9H3U1; Q9H3U8; Q9NSE8; Q9NSE9	0	1.894	0.928829	53.55	56.9	143.1	52.89	54.13	1
Q9H8H3	Putative methyltransferase-like protein 7A OS=Homo sapiens OX=9606 GN=METTL7A PE=1 SV=1	0	88.258	37	8	841	8	244	28.3	8.38	2175.76	8	TMT1A	hsa:25840; Q9H7R3; Q9H8H3; Q9UHZ7; Q9Y422	0	0.536	0.525421	75.06	133.8	66.2	25.6	52.22	1
P61225	Ras-related protein Rap-2b OS=Homo sapiens OX=9606 GN=RAP2B PE=1 SV=1	0	88.068	72	11	387	5	183	20.5	4.81	800.66	11	RAP2B	hsa:5912; P17964; P61225; Q96EG5; Q9CXG0	6	1.029	0.980663	64.84	117.2	82.8	10.66	53.66	1
Q8TAT6	Nuclear protein localization protein 4 homolog OS=Homo sapiens OX=9606 GN=NPLOC4 PE=1 SV=3	0	88.022	34	14	222	14	608	68.1	6.38	416.63	14	NPLOC4	hsa:55666; Q8N3J1; Q8TAT6; Q9H8V2; Q9H964; Q9NWR5; Q9P229	0	1.438	0.986028	60.3	86.4	113.6	17.87	40.06	1	Met-loss+Acetyl [N-Term]
P69891	Hemoglobin subunit gamma-1 OS=Homo sapiens OX=9606 GN=HBG1 PE=1 SV=2	0	87.995	78	10	5893	1	147	16.1	7.2	10753.5	10	HBG1	hsa:3047; P02096; P62027; P69891; Q549G1; Q8TDA1; Q96FH7	10	0.79	0.916313	84.37	92.7	107.3	75.54	77.72	1
Q9NRF8	CTP synthase 2 OS=Homo sapiens OX=9606 GN=CTPS2 PE=1 SV=1	0	87.944	22	9	222	8	586	65.6	6.9	317.77	9	CTPS2	B3KWM2; hsa:56474; Q9BRI0; Q9H809; Q9H8K9; Q9NRF8	0	1.946	0.919583	76.71	39.4	160.6	80.42	56.65	1
Q9BYV1	Alanine--glyoxylate aminotransferase 2, mitochondrial OS=Homo sapiens OX=9606 GN=AGXT2 PE=1 SV=1	0	87.941	38	14	197	14	514	57.1	7.87	240.89	14	AGXT2	B7ZM47; E9PDL7; hsa:64902; Q53FB4; Q53FY7; Q53G03; Q5W7Q1; Q9BYV1	0	0.891	0.955334	74.16	117	83	44.97	80.91	1
O60313	Dynamin-like 120 kDa protein, mitochondrial OS=Homo sapiens OX=9606 GN=OPA1 PE=1 SV=3	0	87.798	22	16	391	16	960	111.6	7.87	599.13	16	OPA1	D3DNW4; E5KLJ5; E5KLJ6; E5KLJ7; E5KLK1; E5KLK2; hsa:4976; O60313	0	1.413	0.9904	50.89	81.7	118.3	21.13	33.79	1
P32455	Guanylate-binding protein 1 OS=Homo sapiens OX=9606 GN=GBP1 PE=1 SV=2	0	87.764	36	14	248	12	592	67.9	6.32	541.91	14	GBP1	D3DT26; hsa:2633; P32455; Q5T8M1	2	0.75	0.896215	94.21	124.2	75.8	49.51	91.67	1	Met-loss+Acetyl [N-Term]
P35637	RNA-binding protein FUS OS=Homo sapiens OX=9606 GN=FUS PE=1 SV=1	0	87.701	17	7	400	5	526	53.4	9.36	894.59	7	FUS	hsa:2521; P35637; Q9H4A8	2	1.647	0.965266	78.44	59.4	140.6	39.38	41.35	1
Q8NFQ8	Torsin-1A-interacting protein 2 OS=Homo sapiens OX=9606 GN=TOR1AIP2 PE=1 SV=1	0	87.322	39	9	106	9	470	51.2	4.96	187.8	9	TOR1AIP2	hsa:163590; Q8NFQ8	0	1.268	0.992504	71.17	80	120	48.37	108.3	1
Q9H3G5	Probable serine carboxypeptidase CPVL OS=Homo sapiens OX=9606 GN=CPVL PE=1 SV=2	0	87.222	31	12	403	12	476	54.1	5.62	721.19	12	CPVL	A4D1A4; hsa:54504; Q6UX20; Q8NBL7; Q96AR7; Q9H3G5; Q9HB41	0	0.997	0.975926	79.27	89.2	110.8	49.71	46.8	1
O60568	Multifunctional procollagen lysine hydroxylase and glycosyltransferase LH3 OS=Homo sapiens OX=9606 GN=PLOD3 PE=1 SV=1	0	87.156	27	16	382	16	738	84.7	6.05	602.46	16	PLOD3	B2R6W6; hsa:8985; O60568; Q540C3	0	1.745	0.953	77.49	55.9	144.1	40.02	27.05	1
Q9NQC3	Reticulon-4 OS=Homo sapiens OX=9606 GN=RTN4 PE=1 SV=2	0	87.129	10	6	339	6	1192	129.9	4.5	946.35	6	RTN4	hsa:57142; O94962; Q7L7Q5; Q7L7Q6; Q7L7Q8; Q8IUA4; Q96B16; Q9BXG5; Q9H212; Q9H3I3; Q9NQC3; Q9UQ42; Q9Y293; Q9Y2Y7; Q9Y5U6	0	0.931	0.964343	74.66	104.5	95.5	22.16	32.67	1	Acetyl [N-Term]
Q8WUM0	Nuclear pore complex protein Nup133 OS=Homo sapiens OX=9606 GN=NUP133 PE=1 SV=2	0	86.968	24	16	173	16	1156	128.9	5.1	195.63	16	NUP133	B2RAZ8; hsa:55746; Q5T8N0; Q8WUM0; Q9H9W2; Q9NV71; Q9NVC4	0	1.195	0.996481	84.34	105.1	94.9	25.76	23.97	1
Q8N1F7	Nuclear pore complex protein Nup93 OS=Homo sapiens OX=9606 GN=NUP93 PE=1 SV=2	0	86.943	30	17	237	17	819	93.4	5.72	405	17	NUP93	B3KPQ8; hsa:9688; Q14705; Q8N1F7	0	1.801	0.942189	62.76	52.8	147.2	23.41	34.08	1
P16070	CD44 antigen OS=Homo sapiens OX=9606 GN=CD44 PE=1 SV=3	0	86.845	13	9	354	9	742	81.5	5.33	677.9	9	CD44	A5YRN9; B6EAT9; D3DR12; D3DR13; hsa:960; O95370; P16070; P22511; Q04858; Q13419; Q13957; Q13958; Q13959; Q13960; Q13961; Q13967; Q13968; Q13980; Q15861; Q16064; Q16065; Q16066; Q16208; Q16522; Q86T72; Q86Z27; Q8N694; Q92493; Q96J24; Q9H5A5; Q9UC28; Q9UC29; Q9UC30; Q9UCB0; Q9UJ36	0	1.262	0.998585	104.48	120	80	27.24	94.05	1
P33993	DNA replication licensing factor MCM7 OS=Homo sapiens OX=9606 GN=MCM7 PE=1 SV=4	0	86.811	31	16	205	16	719	81.3	6.46	310.05	16	MCM7	A4D2A1; A4D2A2; E9PGN9; hsa:4176; P33993; Q15076; Q96D34; Q96GL1	0	2.046	0.897133	90.56	62.7	137.3	51.79	61.56	1	Met-loss+Acetyl [N-Term]
Q969X5	Endoplasmic reticulum-Golgi intermediate compartment protein 1 OS=Homo sapiens OX=9606 GN=ERGIC1 PE=1 SV=1	0	86.811	35	8	543	8	290	32.6	7.06	1180.49	8	ERGIC1	hsa:57222; Q969X5; Q9H0L0; Q9H2J2; Q9ULN9	0	0.996	0.975926	65.05	90.6	109.4	22.33	47.45	1
Q13464	Rho-associated protein kinase 1 OS=Homo sapiens OX=9606 GN=ROCK1 PE=1 SV=1	0	86.724	20	22	218	18	1354	158.1	5.9	284.29	22	ROCK1	B0YJ91; hsa:6093; Q13464; Q2KHM4; Q59GZ4	0	1.05	0.984689	68.65	121.2	78.8	28.95	44.32	1
Q9Y520	Protein PRRC2C OS=Homo sapiens OX=9606 GN=PRRC2C PE=1 SV=4	0	86.718	11	19	142	18	2896	316.7	9.13	115.17	19	PRRC2C	hsa:23215; Q05DM8; Q49A39; Q6PD54; Q9H2N2; Q9HA05; Q9NSM8; Q9NXL3; Q9UF29; Q9UPQ6; Q9Y520	1	1.499	0.987391	67.98	55	145	64.72	69.35	1
O95340	Bifunctional 3'-phosphoadenosine 5'-phosphosulfate synthase 2 OS=Homo sapiens OX=9606 GN=PAPSS2 PE=1 SV=2	0	86.577	31	13	330	12	614	69.5	8.03	532.87	13	PAPSS2	hsa:9060; O95340; Q9BZL2; Q9P0G6; Q9UHM1; Q9UKD3; Q9UP30	1	0.807	0.925961	64.4	75.7	124.3	33.81	53.58	1
Q8TCS8	Polyribonucleotide nucleotidyltransferase 1, mitochondrial OS=Homo sapiens OX=9606 GN=PNPT1 PE=1 SV=2	0	86.546	24	16	270	16	783	85.9	7.77	366.67	16	PNPT1	hsa:87178; Q53SU0; Q68CN1; Q7Z7D1; Q8IWX1; Q8TCS8; Q96T05; Q9BRU3; Q9BVX0	0	1.816	0.940848	45.31	70.4	129.6	128.66	24.9	1
Q9Y6D5	Brefeldin A-inhibited guanine nucleotide-exchange protein 2 OS=Homo sapiens OX=9606 GN=ARFGEF2 PE=1 SV=3	0	86.533	13	16	118	11	1785	201.9	6.33	154.54	16	ARFGEF2	hsa:10564; Q5TFT9; Q9NTS1; Q9Y6D5	4	1.811	0.940848	68.78	84.1	115.9	40.87	29.32	1
Q9BSE5	Agmatinase, mitochondrial OS=Homo sapiens OX=9606 GN=AGMAT PE=1 SV=2	0	86.458	35	10	584	10	352	37.6	7.59	1420.14	10	AGMAT	hsa:79814; Q5TDH1; Q9BSE5; Q9H5J3	0	0.636	0.749698	64.48	124.8	75.2	27.42	53.2	1
P33992	DNA replication licensing factor MCM5 OS=Homo sapiens OX=9606 GN=MCM5 PE=1 SV=5	0	86.435	30	15	195	15	734	82.2	8.37	244.96	15	MCM5	hsa:4174; O60785; P33992; Q14578; Q9BTJ4; Q9BWL8	0	1.879	0.938291	71.55	56.3	143.7	44.69	59.16	1	Met-loss+Acetyl [N-Term]
O14773	Tripeptidyl-peptidase 1 OS=Homo sapiens OX=9606 GN=TPP1 PE=1 SV=2	0	86.342	21	5	201	5	563	61.2	6.48	744.95	5	TPP1	hsa:1200; O14773; Q53HT1; Q5JAK6; Q6UX56; Q71JP6; Q96C37	0	1.097	0.9904	64.42	93.3	106.7	53.89	48.36	1
P13861	cAMP-dependent protein kinase type II-alpha regulatory subunit OS=Homo sapiens OX=9606 GN=PRKAR2A PE=1 SV=2	0	86.338	34	12	539	10	404	45.5	5.07	1096.29	12	PRKAR2A	hsa:5576; P13861; Q16823; Q9BUB1	2	1.424	0.98865	52.9	88.2	111.8	12.82	24.97	1
P17812	CTP synthase 1 OS=Homo sapiens OX=9606 GN=CTPS1 PE=1 SV=2	0	86.263	35	13	263	12	591	66.6	6.46	343.83	13	CTPS1	B4DR64; D3DPW1; hsa:1503; P17812; Q5VW67; Q96GK6	1	1.813	0.940848	62.05	180.4	19.6	41.2	84.67	1
Q9H3P7	Golgi resident protein GCP60 OS=Homo sapiens OX=9606 GN=ACBD3 PE=1 SV=4	0	86.214	39	11	319	11	528	60.6	5.06	518.05	11	ACBD3	B2RB29; hsa:64746; Q5VTJ0; Q6P9F1; Q8IZC5; Q8N4D6; Q9H3P7; Q9H6U3	0	1.929	0.924506	61.64	45.8	154.2	92.13	36.74	1	Met-loss+Acetyl [N-Term]
Q9BRF8	Serine/threonine-protein phosphatase CPPED1 OS=Homo sapiens OX=9606 GN=CPPED1 PE=1 SV=3	0	86.054	49	11	374	11	314	35.5	6.2	846.6	11	CPPED1	B4DQ68; hsa:55313; Q6MZY9; Q9BRF8; Q9H9M9; Q9NUT6	0	1.226	0.998585	64.75	95.6	104.4	23.74	60.43	1
Q9UKS6	Protein kinase C and casein kinase substrate in neurons protein 3 OS=Homo sapiens OX=9606 GN=PACSIN3 PE=1 SV=2	0	86.021	44	14	375	14	424	48.5	6.18	582.16	14	PACSIN3	A6NH84; hsa:29763; Q9H331; Q9NWV9; Q9UKS6	0	0.952	0.969498	107.06	153.6	46.4	17.32	72.44	1	Acetyl [N-Term]
O15247	Chloride intracellular channel protein 2 OS=Homo sapiens OX=9606 GN=CLIC2 PE=1 SV=3	0	85.974	67	10	166	9	247	28.3	5.59	360.98	10	CLIC2	A8K9S0; hsa:1193; O15174; O15247; Q5JT80; Q8TCE3	0	0.668	0.531092	81.97	145.8	54.2	19.53	74.98	1
P23434	Glycine cleavage system H protein, mitochondrial OS=Homo sapiens OX=9606 GN=GCSH PE=1 SV=2	0	85.866	51	7	192	7	173	18.9	4.88	442.23	7	GCSH	hsa:2653; P23434; Q9H1E9	0	0.748	0.896215	89.39	128.6	71.4	32	67.8	1
Q9NVI7	ATPase family AAA domain-containing protein 3A OS=Homo sapiens OX=9606 GN=ATAD3A PE=1 SV=2	0	85.773	27	13	503	8	634	71.3	8.98	960.66	13	ATAD3A	B3KPB3; D2K8Q1; G3V1I6; hsa:55210; Q5SV23; Q8N275; Q96A50; Q9NVI7	6	1.289	0.996481	64.51	111.7	88.3	28.12	21.53	1	Met-loss+Acetyl [N-Term]
P55209	Nucleosome assembly protein 1-like 1 OS=Homo sapiens OX=9606 GN=NAP1L1 PE=1 SV=1	0	85.764	45	12	362	10	391	45.3	4.46	735.11	12	NAP1L1	B3KNT8; B3KV44; hsa:4673; P55209	0	2.523	0.681778	72.28	39.8	160.2	57.97	43.79	1	Met-loss+Acetyl [N-Term]
Q14108	Lysosome membrane protein 2 OS=Homo sapiens OX=9606 GN=SCARB2 PE=1 SV=2	0	85.657	15	6	406	6	478	54.3	5.14	974.74	6	SCARB2	B4DKD8; E7EM68; hsa:950; Q14108; Q53Y63	0	0.786	0.913854	65.51	114.1	85.9	23.33	33.04	1
Q9UHB9	Signal recognition particle subunit SRP68 OS=Homo sapiens OX=9606 GN=SRP68 PE=1 SV=2	0	85.557	30	17	314	17	627	70.7	8.56	616.84	17	SRP68	B3KUU5; B3KWY7; G3V1U4; hsa:6730; Q8NCJ4; Q8WUK2; Q9UHB9	0	1.341	0.99383	61.79	102.9	97.1	20.32	27.05	1
O15372	Eukaryotic translation initiation factor 3 subunit H OS=Homo sapiens OX=9606 GN=EIF3H PE=1 SV=1	0	85.511	43	12	354	12	352	39.9	6.54	549.96	12	EIF3H	hsa:8667; O15372	0	1.615	0.969498	58.6	91.2	108.8	20.56	32.9	1
O95433	Activator of 90 kDa heat shock protein ATPase homolog 1 OS=Homo sapiens OX=9606 GN=AHSA1 PE=1 SV=1	0	85.499	45	11	398	11	338	38.3	5.53	790.43	11	AHSA1	B2R9L2; B4DUR9; hsa:10598; O95433; Q96IL6; Q9P060	0	2.328	0.782057	58.77	46.2	153.8	40.2	13.71	1
O43741	5'-AMP-activated protein kinase subunit beta-2 OS=Homo sapiens OX=9606 GN=PRKAB2 PE=1 SV=1	0	85.419	53	8	156	7	272	30.3	6.46	216.1	8	PRKAB2	A8K9V5; B4DH06; hsa:5565; O43741; Q5VXY0	1	1.195	0.993844	57.5	110.2	89.8	18.54	56.3	1
O15511	Actin-related protein 2/3 complex subunit 5 OS=Homo sapiens OX=9606 GN=ARPC5 PE=1 SV=3	0	85.4	62	6	513	6	151	16.3	5.67	1456.27	6	ARPC5	A6NEC4; hsa:10092; O15511; Q6PG42	0	1.184	0.996481	44.1	91.2	108.8	29.82	13.93	1
Q9UHL4	Dipeptidyl peptidase 2 OS=Homo sapiens OX=9606 GN=DPP7 PE=1 SV=3	0	85.4	34	10	331	10	492	54.3	6.32	757.75	10	DPP7	A8K7U7; hsa:29952; Q5VSF1; Q969X4; Q9UHL4	0	1.254	0.998585	82.75	107	93	47.64	101.45	1
P12004	Proliferating cell nuclear antigen OS=Homo sapiens OX=9606 GN=PCNA PE=1 SV=1	0	85.16	43	8	493	8	261	28.8	4.69	1198.99	8	PCNA	B2R897; D3DW02; hsa:5111; P12004	0	4.679	0.0709645	81.81	15.9	184.1	116.22	32.19	1
P31949	Protein S100-A11 OS=Homo sapiens OX=9606 GN=S100A11 PE=1 SV=2	0	85.1	58	5	410	5	105	11.7	7.12	1198.73	5	S100A11	hsa:6282; P31949; Q5VTK0	0	0.81	0.928554	113.5	134.4	65.6	33.15	121.95	1
Q8IWW8	Hydroxyacid-oxoacid transhydrogenase, mitochondrial OS=Homo sapiens OX=9606 GN=ADHFE1 PE=1 SV=1	0	85.071	44	10	148	10	467	50.3	7.77	240.89	10	ADHFE1	B4DTJ8; hsa:137872; Q49A19; Q68CI7; Q6P2B6; Q8IWW8; Q96MF9	0	0.525	0.265476	65.37	169.6	30.4	44.15	88.88	1
Q15717	ELAV-like protein 1 OS=Homo sapiens OX=9606 GN=ELAVL1 PE=1 SV=2	0	85.05	34	9	470	9	326	36.1	9.17	1270.4	9	ELAVL1	B4DVB8; hsa:1994; Q15717; Q53XN6; Q9BTT1	0	1.541	0.975926	76.04	92.2	107.8	24.01	28.09	1	Met-loss+Acetyl [N-Term]
O76038	Secretagogin OS=Homo sapiens OX=9606 GN=SCGN PE=1 SV=2	0	85.005	50	14	101	14	276	32	5.41	220.22	14	SCGN	A8K0B2; hsa:10590; O76038; Q5VV44; Q96QV7; Q9UJF6	0	1.431	0.988179	91.77	92	108	27.86	64.05	1	Acetyl [N-Term]
Q9Y316	Protein MEMO1 OS=Homo sapiens OX=9606 GN=MEMO1 PE=1 SV=1	0	84.96	55	9	168	9	297	33.7	7.14	375.5	9	MEMO1	B4DLS0; D6W575; hsa:51072; Q5R2V8; Q5R2V9; Q6NSL5; Q9Y316	0	1.256	0.992504	52.65	97.8	102.2	30.44	60.36	1
P52735	Guanine nucleotide exchange factor VAV2 OS=Homo sapiens OX=9606 GN=VAV2 PE=1 SV=2	0	84.937	28	16	208	16	878	101.2	7.08	256.63	16	VAV2	A2RUM4; A8MQ12; B6ZDF5; hsa:7410; P52735; Q5SYV3; Q5SYV4; Q5SYV5; Q6N012; Q6PIJ9; Q6Q317	0	1.563	0.975926	58.01	71.8	128.2	41.72	41.98	1
Q13618	Cullin-3 OS=Homo sapiens OX=9606 GN=CUL3 PE=1 SV=2	0	84.931	23	15	250	15	768	88.9	8.48	428.6	15	CUL3	A8K536; B8ZZC3; hsa:8452; O75415; Q13618; Q569L3; Q9UBI8; Q9UET7	0	1.481	0.984689	57.98	71.4	128.6	41.08	36.79	1
P62906	60S ribosomal protein L10a OS=Homo sapiens OX=9606 GN=RPL10A PE=1 SV=2	0	84.64	39	9	622	9	217	24.8	9.94	1393.09	9	RPL10A	B2R801; hsa:4736; P52859; P53025; P62906; Q5TZT6; Q8J013	0	1.703	0.957629	59.58	78.1	121.9	8.15	45.2	1
P62316	Small nuclear ribonucleoprotein Sm D2 OS=Homo sapiens OX=9606 GN=SNRPD2 PE=1 SV=1	0	84.555	63	9	652	9	118	13.5	9.91	1366.62	9	SNRPD2	A8K797; hsa:6633; J3KPM5; P43330; P62316	0	2.37	0.762071	74.34	63	137	24.39	19.29	1	Met-loss+Acetyl [N-Term]
P0DP25	Calmodulin-3 OS=Homo sapiens OX=9606 GN=CALM3 PE=1 SV=1	0	84.46	54	7	539	7	149	16.8	4.22	1486.36	7	CALM3	hsa:801; hsa:805; hsa:808; P02593; P0DP25; P62158; P70667; P99014; Q13942; Q53S29; Q61379; Q61380; Q96HK3	0	1.043	0.983577	77.82	92	108	25.24	35.64	1	Met-loss [N-Term]; Met-loss+Acetyl [N-Term]
Q9H9P8	L-2-hydroxyglutarate dehydrogenase, mitochondrial OS=Homo sapiens OX=9606 GN=L2HGDH PE=1 SV=3	0	84.429	33	10	348	10	463	50.3	8.15	653.24	10	L2HGDH	hsa:79944; Q9BRR1; Q9H9P8	0	0.897	0.940848	75.39	123.2	76.8	40.38	75.82	1
P09455	Retinol-binding protein 1 OS=Homo sapiens OX=9606 GN=RBP1 PE=1 SV=2	0	84.403	59	11	369	11	135	15.8	5.11	695.14	11	RBP1	A8K2Q0; B7Z7A0; E7EWV0; F2Z2F2; hsa:5947; P09455; Q6FGX8	0	0.563	0.587477	68.92	149.1	50.9	14.29	70.3	1	Met-loss [N-Term]
P50502	Hsc70-interacting protein OS=Homo sapiens OX=9606 GN=ST13 PE=1 SV=2	0	84.396	25	8	664	8	369	41.3	5.27	1571.18	8	ST13	hsa:6767; O14999; P50502; Q2TU77	0	2.078	0.885993	61.77	64.8	135.2	29.45	30.32	1
P68400	Casein kinase II subunit alpha OS=Homo sapiens OX=9606 GN=CSNK2A1 PE=1 SV=1	0	84.371	30	8	220	7	391	45.1	7.74	472	8	CSNK2A1	B4DYS6; D3DVV8; hsa:1457; P19138; P20426; P68400; Q14013; Q5U065	1	2.237	0.801821	46.2	58.6	141.4	55.4	20.75	1
Q9P258	Protein RCC2 OS=Homo sapiens OX=9606 GN=RCC2 PE=1 SV=2	0	84.319	38	14	243	14	522	56	8.78	373.83	14	RCC2	hsa:55920; Q8IVL9; Q9BSN6; Q9NPV8; Q9P258	0	1.55	0.983577	72.11	52.9	147.1	60	77.1	1
Q8TDB6	E3 ubiquitin-protein ligase DTX3L OS=Homo sapiens OX=9606 GN=DTX3L PE=1 SV=1	0	84.276	28	15	294	15	740	83.5	8.06	404.71	15	DTX3L	B3KWH6; hsa:151636; Q53ZZ3; Q5MJP7; Q8TDB6	0	1.315	0.99383	58.25	88.2	111.8	143.73	40.39	1
Q96PZ0	Pseudouridylate synthase 7 homolog OS=Homo sapiens OX=9606 GN=PUS7 PE=1 SV=2	0	84.16	25	11	119	11	661	75	6.37	154.29	11	PUS7	hsa:54517; Q75MG4; Q96PZ0; Q9NX19	0	2.063	0.886404	63.08	22	178	88.78	65.87	1
O43488	Aflatoxin B1 aldehyde reductase member 2 OS=Homo sapiens OX=9606 GN=AKR7A2 PE=1 SV=3	0	84.09	43	9	675	7	359	39.6	7.17	1594.21	9	AKR7A2	hsa:8574; O43488; O75749; Q5TG63	1	0.869	0.945942	61.92	106	94	27.48	32.41	1
O95861	3'(2'),5'-bisphosphate nucleotidase 1 OS=Homo sapiens OX=9606 GN=BPNT1 PE=1 SV=1	0	84.046	48	11	687	11	308	33.4	5.69	1337.94	11	BPNT1	A8K7C8; B4DPS5; B4DUS9; D3DTA9; hsa:10380; O95861; Q8WVL5; Q9UGJ3	0	1.674	0.961492	64.21	69.4	130.6	39.04	35.18	1	Met-loss+Acetyl [N-Term]
Q9UKA9	Polypyrimidine tract-binding protein 2 OS=Homo sapiens OX=9606 GN=PTBP2 PE=1 SV=1	0	84.036	44	11	104	10	531	57.5	8.66	100.95	11	PTBP2	hsa:58155; Q8N0Z1; Q8N160; Q8NFB0; Q8NFB1; Q969N9; Q96Q76; Q9UKA9	0	2.14	0.857348	101.21	31.4	168.6	55.99	70.09	1
P0DOX2	Immunoglobulin alpha-2 heavy chain OS=Homo sapiens OX=9606 PE=1 SV=2	0	83.917	34	9	715	5	455	48.9	6.67	1347.11	9			1	1.158	0.99383	92.87	105.3	94.7	37.35	75.29	1
Q8IYQ7	Threonine synthase-like 1 OS=Homo sapiens OX=9606 GN=THNSL1 PE=1 SV=2	0	83.724	26	15	359	15	743	83	7.12	644.76	15	THNSL1	B3KWL1; D3DRV3; hsa:79896; Q5VV21; Q8IYQ7	0	0.857	0.942189	70.06	165.9	34.1	31.06	97.01	1
P63151	Serine/threonine-protein phosphatase 2A 55 kDa regulatory subunit B alpha isoform OS=Homo sapiens OX=9606 GN=PPP2R2A PE=1 SV=1	0	83.687	39	10	274	7	447	51.7	6.2	450.53	10	PPP2R2A	B2RBU8; B4E1T7; hsa:5520; P50409; P63151; Q00007	3	1.422	0.988781	89.08	79.7	120.3	21.03	58.5	1
P62249	40S ribosomal protein S16 OS=Homo sapiens OX=9606 GN=RPS16 PE=1 SV=2	0	83.596	60	12	717	12	146	16.4	10.21	1201.49	12	RPS16	B2RDD5; hsa:6217; P17008; P62249	0	1.666	0.962959	62.6	82.5	117.5	18.38	51.09	1	Met-loss [N-Term]
O43895	Xaa-Pro aminopeptidase 2 OS=Homo sapiens OX=9606 GN=XPNPEP2 PE=1 SV=3	0	83.56	28	13	68	13	674	75.6	6.04	118.83	13	XPNPEP2	A0AV16; hsa:7512; O43895; O75994	0	1.272	0.998449	53.18	93.4	106.6	17.68	38.63	1
P52565	Rho GDP-dissociation inhibitor 1 OS=Homo sapiens OX=9606 GN=ARHGDIA PE=1 SV=3	0	83.309	62	9	710	9	204	23.2	5.11	1585.72	9	ARHGDIA	A8MXW0; B2R5X1; B4DDD3; B4DUV9; hsa:396; P52565; Q6IBM5	0	1.159	0.99383	49.48	97.6	102.4	19.26	30.2	1	Met-loss+Acetyl [N-Term]
P27635	60S ribosomal protein L10 OS=Homo sapiens OX=9606 GN=RPL10 PE=1 SV=5	0	83.244	39	9	595	9	214	24.6	10.08	1483.15	9	RPL10	A3KQT0; D3DWW6; hsa:6134; P27635; Q16470; Q2HXT7; Q53FH7; Q6FGN8; Q8TDA5	0	2.447	0.73155	81.12	60.5	139.5	18.82	53.78	1
Q9HBK9	Arsenite methyltransferase OS=Homo sapiens OX=9606 GN=AS3MT PE=1 SV=3	0	83.228	40	10	165	10	375	41.7	6.2	261.9	10	AS3MT	A6NP79; hsa:57412; Q0VDK3; Q0VDK4; Q5PZ02; Q9HBK9	0	1.212	0.998585	72.84	125.7	74.3	36.78	82.3	1
P16157	Ankyrin-1 OS=Homo sapiens OX=9606 GN=ANK1 PE=1 SV=3	0	83.184	13	17	185	15	1881	206.1	6.01	257.27	17	ANK1	A0PJN8; A6NJ23; E5RFL7; hsa:286; O43400; P16157; Q13768; Q53ER1; Q59FP2; Q8N604; Q99407	0	0.82	0.82972	60.06	120.6	79.4	32.64	50.43	1
P35914	Hydroxymethylglutaryl-CoA lyase, mitochondrial OS=Homo sapiens OX=9606 GN=HMGCL PE=1 SV=2	0	83.111	32	9	645	9	325	34.3	8.54	1445.3	9	HMGCL	B4DUP4; B7UCC6; D3Y5K7; hsa:3155; P35914; Q6IBC0; Q96FP8	0	0.384	0.153559	72.38	144.3	55.7	25.65	45.16	1
O43615	Mitochondrial import inner membrane translocase subunit TIM44 OS=Homo sapiens OX=9606 GN=TIMM44 PE=1 SV=2	0	83.105	33	13	425	13	452	51.3	8.32	808.5	13	TIMM44	A8K0R9; D6W664; hsa:10469; O43615; Q8N193	0	1.38	0.992504	48.94	80	120	40.49	32.76	1
Q96FW1	Ubiquitin thioesterase OTUB1 OS=Homo sapiens OX=9606 GN=OTUB1 PE=1 SV=2	0	83.044	51	8	288	8	271	31.3	4.94	541.47	8	OTUB1	hsa:55611; Q32Q78; Q96FW1; Q96II3; Q9NXQ4; Q9P0B8	0	1.451	0.984689	72.53	79.3	120.7	41.78	39.16	1
Q9Y263	Phospholipase A-2-activating protein OS=Homo sapiens OX=9606 GN=PLAA PE=1 SV=2	0	83.009	20	14	296	14	795	87.1	6.37	356.92	14	PLAA	hsa:9373; Q53EU5; Q5VY33; Q9NUL8; Q9NVE9; Q9UF53; Q9Y263; Q9Y5L1	0	1.448	0.984689	58.78	85.7	114.3	55.48	74.27	1
O75368	Adapter SH3BGRL OS=Homo sapiens OX=9606 GN=SH3BGRL PE=1 SV=1	0	82.854	85	8	496	8	114	12.8	5.25	1233.15	8	SH3BGRL	hsa:6451; O75368; Q3SYL1; Q5JT50; Q6FIE8; Q9H0N8	0	0.533	0.517717	62.91	139	61	25.27	55.89	1
Q6P2E9	Enhancer of mRNA-decapping protein 4 OS=Homo sapiens OX=9606 GN=EDC4 PE=1 SV=1	0	82.679	17	15	137	15	1401	151.6	5.86	207.09	15	EDC4	A6NGM1; A8K4T4; hsa:23644; Q13025; Q13826; Q6P2E9; Q6ZR12; Q7Z6H7	0	1.367	0.992504	63.41	95	105	15.03	52.71	1
O43865	S-adenosylhomocysteine hydrolase-like protein 1 OS=Homo sapiens OX=9606 GN=AHCYL1 PE=1 SV=2	0	82.669	35	15	610	5	530	58.9	6.89	942.25	15	AHCYL1	B4E168; hsa:10768; O43865; Q2TAJ6; Q502W8; Q5VSM0; Q6P171; Q96PK4; Q9UG84	6	0.988	0.975926	51.12	96	104	27.14	28.95	1
P57764	Gasdermin-D OS=Homo sapiens OX=9606 GN=GSDMD PE=1 SV=1	0	82.648	31	10	272	10	484	52.8	5.08	501.19	10	GSDMD	A8K702; D3DWJ9; hsa:79792; P57764; Q96Q98	0	1.622	0.972752	73.86	71.1	128.9	28.03	77.15	1
P17661	Desmin OS=Homo sapiens OX=9606 GN=DES PE=1 SV=3	0	82.59	35	12	785	8	470	53.5	5.27	1926.34	12	DES	hsa:1674; P17661; Q15787; Q549R7; Q549R8; Q549R9; Q8IZR1; Q8IZR6; Q8NES2; Q8NEU6; Q8TAC4; Q8TCX2; Q8TD99; Q9UHN5; Q9UJ80	0	0.892	0.883208	87.4	109.6	90.4	51.9	63.34	1
Q08378	Golgin subfamily A member 3 OS=Homo sapiens OX=9606 GN=GOLGA3 PE=1 SV=2	0	82.474	18	19	149	19	1498	167.3	5.44	150.29	19	GOLGA3	A5PKX6; hsa:2802; O43241; Q08378; Q6P9C7; Q86XW3; Q8TDA9; Q8WZA3	0	1.205	0.998449	77.94	90.8	109.2	46.93	39.48	1
P15374	Ubiquitin carboxyl-terminal hydrolase isozyme L3 OS=Homo sapiens OX=9606 GN=UCHL3 PE=1 SV=1	0	82.403	42	9	149	9	230	26.2	4.92	355.04	9	UCHL3	B2R970; hsa:7347; P15374; Q5TBK8; Q6IBE9	0	0.931	0.950528	51.54	105.8	94.2	18.63	43.97	1
Q9UFN0	Protein NipSnap homolog 3A OS=Homo sapiens OX=9606 GN=NIPSNAP3A PE=1 SV=2	0	82.391	52	11	418	11	247	28.4	9.16	985.35	11	NIPSNAP3A	A6NM55; hsa:25934; Q5VX32; Q9BRV7; Q9H843; Q9P083; Q9UFN0	0	0.604	0.677509	70.13	134.5	65.5	16.12	70.9	1
P61619	Protein transport protein Sec61 subunit alpha isoform 1 OS=Homo sapiens OX=9606 GN=SEC61A1 PE=1 SV=2	0	82.349	32	10	382	10	476	52.2	8.06	825.39	10	SEC61A1	hsa:29927; P38378; P57726; P61619; Q5JPF8; Q8N0Z4; Q8N3U3; Q8NC71; Q9BU16; Q9Y2R3	0	1.175	0.994134	74.54	105.9	94.1	46.48	37.63	1
Q8NFW8	N-acylneuraminate cytidylyltransferase OS=Homo sapiens OX=9606 GN=CMAS PE=1 SV=2	0	82.129	30	11	369	11	434	48.3	7.93	689.47	11	CMAS	hsa:55907; Q8NFW8; Q96AX5; Q9NQZ0	0	1.22	0.996678	66.69	87.7	112.3	16.39	50.03	1
P35754	Glutaredoxin-1 OS=Homo sapiens OX=9606 GN=GLRX PE=1 SV=2	0	82.05	75	6	364	6	106	11.8	8.09	1057.9	6	GLRX	B2R4L2; hsa:2745; P35754; Q3KQS1; Q6ICT1	0	0.572	0.610551	87.36	122.5	77.5	27.33	63.23	1	Met-loss+Acetyl [N-Term]
Q9UBB4	Ataxin-10 OS=Homo sapiens OX=9606 GN=ATXN10 PE=1 SV=1	0	82.01	39	14	210	14	475	53.5	5.25	310.14	14	ATXN10	A6NLC4; B4DG05; hsa:25814; O14998; O15009; Q6I9X4; Q9UBB4	0	1.791	0.945942	72.21	32.9	167.1	88.47	33.04	1
Q14157	Ubiquitin-associated protein 2-like OS=Homo sapiens OX=9606 GN=UBAP2L PE=1 SV=2	0	81.946	16	9	152	9	1087	114.5	7.11	241.43	9	UBAP2L	B4E0U8; hsa:9898; Q14157; Q5VU75; Q5VU76; Q9BTU3; Q9UGL2; Q9UGL3; Q9UGL4; Q9UGL5	0	2.478	0.664809	77.72	26.8	173.2	98.78	45.47	1
Q14258	E3 ubiquitin/ISG15 ligase TRIM25 OS=Homo sapiens OX=9606 GN=TRIM25 PE=1 SV=2	0	81.824	33	15	412	15	630	70.9	8.09	709.92	15	TRIM25	hsa:7706; Q14258	0	1.408	0.989214	53.87	67.3	132.7	41.74	72.85	1
Q2TAY7	WD40 repeat-containing protein SMU1 OS=Homo sapiens OX=9606 GN=SMU1 PE=1 SV=2	0	81.666	35	13	283	13	513	57.5	7.18	412.41	13	SMU1	B4E3L0; hsa:55234; Q2TAY7; Q9BU59; Q9HA96; Q9NVD1	0	1.707	0.960127	60.71	74.2	125.8	41.91	38.77	1
Q16706	Alpha-mannosidase 2 OS=Homo sapiens OX=9606 GN=MAN2A1 PE=1 SV=2	0	81.43	19	15	193	15	1144	131.1	7.58	336.17	15	MAN2A1	hsa:4124; Q16706; Q16767	0	1.627	0.972752	49.72	66	134	30.53	46.38	1
P16104	Histone H2AX OS=Homo sapiens OX=9606 GN=H2AX PE=1 SV=2	0	81.394	52	5	367	2	143	15.1	10.74	986.79	5	H2AX	hsa:3014; P16104; Q4ZGJ7; Q6IAS5	1	2.654	0.614164	102.17	35.3	164.7	80.41	60.72	1
Q12792	Twinfilin-1 OS=Homo sapiens OX=9606 GN=TWF1 PE=1 SV=3	0	81.307	42	10	302	10	350	40.3	6.96	739.56	10	TWF1	A8K5A8; B3KXS6; B4DLX9; hsa:5756; Q12792; Q59G07; Q5U0B1; Q6FHJ1; Q6FHL6; Q6NUK9; Q86XL6; Q8TCD3	0	1.632	0.966611	53.05	71.3	128.7	29.48	27.46	1	Met-loss+Acetyl [N-Term]
Q7L0Y3	tRNA methyltransferase 10 homolog C OS=Homo sapiens OX=9606 GN=TRMT10C PE=1 SV=2	0	81.257	47	14	263	14	403	47.3	9.36	298.11	14	TRMT10C	hsa:54931; Q7L0Y3; Q9NRG5; Q9NX54; Q9Y596	0	1.78	0.950107	60.13	59.7	140.3	24.26	54.28	1
O75439	Mitochondrial-processing peptidase subunit beta OS=Homo sapiens OX=9606 GN=PMPCB PE=1 SV=2	0	81.195	44	15	249	15	489	54.3	6.83	274.32	15	PMPCB	hsa:9512; O60416; O75439; Q96FV4	0	1.417	0.9904	61.53	69.3	130.7	38.49	53.25	1
P10412	Histone H1.4 OS=Homo sapiens OX=9606 GN=H1-4 PE=1 SV=2	0	80.959	26	8	1082	3	219	21.9	11.03	2702.58	8	H1-4	hsa:3008; P10412; Q4VB25	5	1.033	0.980663	72.08	96.3	103.7	37.46	53.29	1	Met-loss [N-Term]; Met-loss+Acetyl [N-Term]
Q9BVK6	Transmembrane emp24 domain-containing protein 9 OS=Homo sapiens OX=9606 GN=TMED9 PE=1 SV=2	0	80.886	35	9	473	8	235	27.3	8.02	1258.38	9	TMED9	hsa:54732; Q14437; Q8WZ61; Q9BVK6	1	1.383	0.992504	41.42	83.9	116.1	21.51	19.92	1
P28845	11-beta-hydroxysteroid dehydrogenase 1 OS=Homo sapiens OX=9606 GN=HSD11B1 PE=1 SV=3	0	80.843	35	9	346	9	292	32.4	8.56	735.41	9	HSD11B1	B2R9Z1; D3DT89; hsa:3290; P28845	0	0.357	0.107972	103.16	176.4	23.6	37.86	84.4	1
Q96DC8	Enoyl-CoA hydratase domain-containing protein 3, mitochondrial OS=Homo sapiens OX=9606 GN=ECHDC3 PE=1 SV=2	0	80.752	42	11	485	11	303	32.6	8.65	1167.26	11	ECHDC3	hsa:79746; Q53HR9; Q5W0J7; Q8WYY8; Q96DC8; Q9BVL8; Q9H7G4	0	0.753	0.896853	88.11	170.6	29.4	45.1	113.08	1
P28482	Mitogen-activated protein kinase 1 OS=Homo sapiens OX=9606 GN=MAPK1 PE=1 SV=3	0	80.741	44	12	242	11	360	41.4	6.98	539.92	12	MAPK1	A8CZ64; hsa:5594; P28482	1	1.398	0.9904	73.1	93.3	106.7	43.77	35.85	1
Q99459	Cell division cycle 5-like protein OS=Homo sapiens OX=9606 GN=CDC5L PE=1 SV=2	0	80.665	30	13	280	13	802	92.2	8.18	332.03	13	CDC5L	hsa:988; Q76N46; Q99459; Q99974	0	1.457	0.984689	56.75	59.3	140.7	33.36	21.86	1
P80723	Brain acid soluble protein 1 OS=Homo sapiens OX=9606 GN=BASP1 PE=1 SV=2	0	80.645	44	7	187	7	227	22.7	4.63	561.74	7	BASP1	B4DJA8; D3DTD5; hsa:10409; O43596; P80723; Q5U0S0; Q9BWA5	0	0.631	0.733443	73.62	125.8	74.2	37.55	62.63	1
Q99598	Translin-associated protein X OS=Homo sapiens OX=9606 GN=TSNAX PE=1 SV=1	0	80.613	56	11	223	11	290	33.1	6.55	477.76	11	TSNAX	B1APC6; hsa:7257; Q99598	0	3.132	0.408205	78.08	19.7	180.3	130.52	47.8	1
Q16222	UDP-N-acetylhexosamine pyrophosphorylase OS=Homo sapiens OX=9606 GN=UAP1 PE=1 SV=3	0	80.552	37	15	327	15	522	58.7	6.33	377.32	15	UAP1	B2R6R8; hsa:6675; Q16222; Q5VTA9; Q5VTB0; Q5VTB1; Q96GM2	0	1.531	0.975926	69.89	87.5	112.5	14.39	50.64	1
Q9UJ83	2-hydroxyacyl-CoA lyase 1 OS=Homo sapiens OX=9606 GN=HACL1 PE=1 SV=2	0	80.464	24	7	268	7	578	63.7	7.36	526.04	7	HACL1	B4DWI1; B4DXI5; E9PEN4; hsa:26061; Q9BV42; Q9P0A2; Q9UJ83	0	0.859	0.940848	72.53	118.9	81.1	31.35	55.95	1
Q96C23	Galactose mutarotase OS=Homo sapiens OX=9606 GN=GALM PE=1 SV=1	0	80.445	35	9	629	9	342	37.7	6.65	1219.06	9	GALM	hsa:130589; Q53RY1; Q8NIA2; Q96C23; V9HWA8	0	1.02	0.97911	80.01	101.3	98.7	19.55	52.31	1
P63208	S-phase kinase-associated protein 1 OS=Homo sapiens OX=9606 GN=SKP1 PE=1 SV=2	0	80.392	66	7	356	7	163	18.6	4.54	674.19	7	SKP1	D3DQ97; D3DQ98; hsa:6500; P34991; P63208; Q8TAY2	0	1.91	0.925961	51.86	65.7	134.3	16.29	30.66	1
O15228	Dihydroxyacetone phosphate acyltransferase OS=Homo sapiens OX=9606 GN=GNPAT PE=1 SV=1	0	80.325	26	14	121	14	680	77.1	6.57	210.65	14	GNPAT	B4DNM9; hsa:8443; O15228; Q5TBH7; Q9BWC2	0	1.586	0.974711	73.74	65	135	43.21	47.86	1
P49354	Protein farnesyltransferase/geranylgeranyltransferase type-1 subunit alpha OS=Homo sapiens OX=9606 GN=FNTA PE=1 SV=1	0	80.296	31	10	193	10	379	44.4	5.08	332.78	10	FNTA	A6NJW0; hsa:2339; P49354; Q53XJ9; Q9UDC1	0	1.582	0.978845	53.57	62.8	137.2	32.28	43.06	1
Q13185	Chromobox protein homolog 3 OS=Homo sapiens OX=9606 GN=CBX3 PE=1 SV=4	0	80.277	44	9	662	7	183	20.8	5.33	1825.59	9	CBX3	hsa:11335; Q13185; Q96CD7; Q99409; Q9BVS3; Q9P0Z6	2	2.591	0.658585	72.09	50.5	149.5	56.39	37.54	1
O60888	Protein CutA OS=Homo sapiens OX=9606 GN=CUTA PE=1 SV=2	0	80.166	41	5	407	5	179	19.1	5.5	1221.4	5	CUTA	A2AB26; A2BEL4; hsa:51596; O60888; Q3B784; Q5JXM9; Q5SU05; Q9NYQ9	0	1.633	0.966611	53.28	69.3	130.7	25.07	45.24	1
Q9Y6Y8	SEC23-interacting protein OS=Homo sapiens OX=9606 GN=SEC23IP PE=1 SV=1	0	80.161	21	13	399	13	1000	111	5.54	675.85	13	SEC23IP	D3DRD2; hsa:11196; Q8IXH5; Q9BUK5; Q9Y6Y8	0	1.38	0.992504	50.41	80.2	119.8	34.72	32.17	1
P04062	Lysosomal acid glucosylceramidase OS=Homo sapiens OX=9606 GN=GBA1 PE=1 SV=3	0	80.029	31	11	258	11	536	59.7	7.61	533.02	11	GBA1	A8K796; B7Z5G2; B7Z6S1; hsa:2629; J3KQG4; J3KQK9; P04062; Q16545; Q4VX22; Q6I9R6; Q9UMJ8	0	2.522	0.665764	74.85	37	163	102.56	50.26	1
P08183	ATP-dependent translocase ABCB1 OS=Homo sapiens OX=9606 GN=ABCB1 PE=1 SV=3	0	79.971	15	13	143	11	1280	141.4	9	271.94	13	ABCB1	A8K294; B5AK60; hsa:5243; P08183; Q12755; Q14812	2	1.248	0.99383	59.34	84.4	115.6	36.95	63.29	1	Acetyl [N-Term]
Q9NQX3	Gephyrin OS=Homo sapiens OX=9606 GN=GPHN PE=1 SV=1	0	79.855	28	13	286	13	736	79.7	5.43	427.19	13	GPHN	hsa:10243; Q96KU4; Q9H4E9; Q9NQX3; Q9P2G2	0	0.93	0.957664	50.78	124.5	75.5	53.57	73.55	1	Met-loss+Acetyl [N-Term]
Q9UKU0	Long-chain-fatty-acid--CoA ligase 6 OS=Homo sapiens OX=9606 GN=ACSL6 PE=1 SV=4	0	79.773	28	14	93	14	697	77.7	7.43	148.95	14	ACSL6	hsa:23305; J3KPG3; O94924; O95829; Q108M9; Q108N0; Q4G191; Q86TN7; Q9UKU0	0	2.63	0.570935	109.05	27	173	61.83	83.28	1	Acetyl [N-Term]
P80188	Neutrophil gelatinase-associated lipocalin OS=Homo sapiens OX=9606 GN=LCN2 PE=1 SV=2	0	79.683	53	9	195	9	198	22.6	8.91	373.61	9	LCN2	A6NII8; B4DWV4; B7ZAA2; hsa:3934; P30150; P80188; Q5SYV9; Q5SYW0; Q6FGL5; Q92683	0	1.495	0.980663	111.99	93.1	106.9	44.08	101.86	1
P17612	cAMP-dependent protein kinase catalytic subunit alpha OS=Homo sapiens OX=9606 GN=PRKACA PE=1 SV=2	0	79.575	37	10	275	6	351	40.6	8.79	565.01	10	PRKACA	hsa:5566; P17612; Q32P54; Q9H2Y0; Q9NRB4; Q9NRH9	5	1.084	0.98901	62.18	100.7	99.3	27.83	54.58	1
A0AV96	RNA-binding protein 47 OS=Homo sapiens OX=9606 GN=RBM47 PE=1 SV=2	0	79.443	23	11	236	10	593	64.1	7.68	407.19	11	RBM47	A0AV96; A0PJK2; B5MED4; hsa:54502; Q8NI52; Q8NI53; Q9NXG3	0	1.584	0.980663	58.46	64.4	135.6	43.78	76.95	1
P14174	Macrophage migration inhibitory factor OS=Homo sapiens OX=9606 GN=MIF PE=1 SV=4	0	79.431	43	5	1515	5	115	12.5	7.88	3318.87	5	MIF	A5Z1R8; B2R4S3; hsa:4282; P14174; Q2V4Y5; Q6FHV0	0	1.264	0.998585	59.93	91	109	22.06	38.71	1	Met-loss [N-Term]; Met-loss+Acetyl [N-Term]
Q15019	Septin-2 OS=Homo sapiens OX=9606 GN=SEPTIN2 PE=1 SV=1	0	79.375	33	7	307	7	361	41.5	6.6	843.74	7	SEPTIN2	B4DGE8; hsa:4735; Q14132; Q15019; Q53QU3; Q8IUK9; Q96CB0	0	0.931	0.964343	55.43	102.8	97.2	21	36.53	1
Q8N3C0	Activating signal cointegrator 1 complex subunit 3 OS=Homo sapiens OX=9606 GN=ASCC3 PE=1 SV=3	0	79.355	13	18	98	18	2202	251.3	7.09	136.28	18	ASCC3	E7EW23; hsa:10973; O43738; Q4G1A0; Q5VTN2; Q8N3C0; Q9H1I9; Q9H5A2; Q9NTR0	0	1.77	0.956013	58.97	33.4	166.6	104.46	41.72	1
P35613	Basigin OS=Homo sapiens OX=9606 GN=BSG PE=1 SV=2	0	79.342	25	7	394	7	385	42.2	5.66	688.79	7	BSG	A6NJW1; D3YLG5; hsa:682; P35613; Q7Z796; Q8IZL7	0	1.9	0.929557	70.74	67.5	132.5	21.28	64.38	1
Q9Y305	Acyl-coenzyme A thioesterase 9, mitochondrial OS=Homo sapiens OX=9606 GN=ACOT9 PE=1 SV=2	0	79.237	37	12	309	12	439	49.9	8.6	560.41	12	ACOT9	B3KNC9; B7ZM94; hsa:23597; Q9Y305	0	1.302	0.996481	50.55	88.7	111.3	22.38	32.38	1
Q02880	DNA topoisomerase 2-beta OS=Homo sapiens OX=9606 GN=TOP2B PE=1 SV=3	0	79.117	14	14	140	12	1626	183.2	8	164.01	14	TOP2B	hsa:7155; Q02880; Q13600; Q9UMG8; Q9UQP8	2	1.442	0.985378	63.17	109.7	90.3	22.18	64.97	1
P17252	Protein kinase C alpha type OS=Homo sapiens OX=9606 GN=PRKCA PE=1 SV=4	0	79.108	24	12	343	11	672	76.7	7.05	582.31	12	PRKCA	B5BU22; hsa:5578; P17252; Q15137; Q32M72; Q96RE4	1	1.354	0.992504	71.23	85.5	114.5	22.34	48.65	1
Q5T1M5	FK506-binding protein 15 OS=Homo sapiens OX=9606 GN=FKBP15 PE=1 SV=2	0	78.97	18	14	212	14	1219	133.5	5.2	321.81	14	FKBP15	hsa:23307; Q05DK8; Q5T1M2; Q5T1M5; Q6DD85; Q9Y4D0	0	1.176	0.992504	47.44	84.5	115.5	41.08	30.63	1
P62753	40S ribosomal protein S6 OS=Homo sapiens OX=9606 GN=RPS6 PE=1 SV=1	0	78.922	39	10	488	10	249	28.7	10.84	1064.09	10	RPS6	hsa:6194; P08227; P10660; P62753; Q4VBY7; Q8N6Z7	0	1.549	0.975926	65.14	69.2	130.8	31.85	64.92	1
Q15738	Sterol-4-alpha-carboxylate 3-dehydrogenase, decarboxylating OS=Homo sapiens OX=9606 GN=NSDHL PE=1 SV=2	0	78.874	28	8	312	8	373	41.9	8.06	474.78	8	NSDHL	D3DWT6; hsa:50814; O00344; Q15738	0	0.944	0.957664	79.77	114.3	85.7	37.32	78.56	1	Acetyl [N-Term]
Q9H6Z4	Ran-binding protein 3 OS=Homo sapiens OX=9606 GN=RANBP3 PE=1 SV=1	0	78.855	29	10	242	10	567	60.2	4.78	398.65	10	RANBP3	B2RAT8; hsa:8498; O60405; O75759; O75760; Q9BT47; Q9H6Z4; Q9UG74	0	1.327	0.99383	80.35	108.5	91.5	11.19	48.68	1	Met-loss+Acetyl [N-Term]
P46783	40S ribosomal protein S10 OS=Homo sapiens OX=9606 GN=RPS10 PE=1 SV=1	0	78.756	53	10	643	10	165	18.9	10.15	1342.76	10	RPS10	B2R4E3; hsa:6204; P46783; Q5TZC0	0	1.726	0.955025	73.32	78.4	121.6	15.41	47.69	1
P42345	Serine/threonine-protein kinase mTOR OS=Homo sapiens OX=9606 GN=MTOR PE=1 SV=1	0	78.743	10	17	77	17	2549	288.7	7.17	97.28	17	MTOR	hsa:2475; P42345; Q4LE76; Q5TER1; Q6LE87; Q96QG3; Q9Y4I3	0	1.889	0.936521	63.03	46.3	153.7	49.78	37.36	1
P62841	40S ribosomal protein S15 OS=Homo sapiens OX=9606 GN=RPS15 PE=1 SV=2	0	78.721	56	5	310	5	145	17	10.39	763.25	5	RPS15	A5D8V9; hsa:6209; P11174; P62841; Q3KRA1; Q9UDC2	0	2.802	0.552518	101.53	45.1	154.9	44.72	55.85	1
O75489	NADH dehydrogenase [ubiquinone] iron-sulfur protein 3, mitochondrial OS=Homo sapiens OX=9606 GN=NDUFS3 PE=1 SV=1	0	78.712	36	10	552	10	264	30.2	7.5	1212.99	10	NDUFS3	B2R9J1; B4DFM8; hsa:4722; O75489; Q9UNQ8	0	1.256	0.998585	46.93	86.4	113.6	22.36	42.07	1
O60762	Dolichol-phosphate mannosyltransferase subunit 1 OS=Homo sapiens OX=9606 GN=DPM1 PE=1 SV=1	0	78.688	56	10	216	10	260	29.6	9.57	477.17	10	DPM1	hsa:8813; O15157; O60762; Q6IB78; Q96HK0	0	1.887	0.931204	55.43	78.2	121.8	34.86	50.58	1
O00203	AP-3 complex subunit beta-1 OS=Homo sapiens OX=9606 GN=AP3B1 PE=1 SV=3	0	78.687	14	13	245	13	1094	121.2	6.04	331.53	13	AP3B1	E5RJ68; hsa:8546; O00203; O00580; Q7Z393; Q9HD66	0	1.646	0.972752	52.86	56.2	143.8	43.95	33.3	1
O60749	Sorting nexin-2 OS=Homo sapiens OX=9606 GN=SNX2 PE=1 SV=2	0	78.676	27	14	679	12	519	58.4	5.12	1357.51	14	SNX2	B3KN44; B4DEK4; B7Z408; hsa:6643; O43650; O60749; P82862; Q53XK8; Q597H6; Q9BTS8	0	1.043	0.983577	36.17	99.6	100.4	10.33	21.58	1
P36269	Glutathione hydrolase 5 proenzyme OS=Homo sapiens OX=9606 GN=GGT5 PE=1 SV=2	0	78.639	27	10	453	10	586	62.2	7.55	1205.27	10	GGT5	hsa:2687; P36269; Q53XM9; Q6GMP0; Q96FC1; Q9UFM5	0	0.149	0.000176325	54.75	178.1	21.9	30.21	66.05	1
Q9BZK7	F-box-like/WD repeat-containing protein TBL1XR1 OS=Homo sapiens OX=9606 GN=TBL1XR1 PE=1 SV=1	0	78.619	36	11	129	11	514	55.6	5.55	202.73	11	TBL1XR1	D3DNQ9; hsa:79718; Q14DC3; Q9BZK7; Q9H2I1; Q9H9A1	0	2.169	0.846609	69.73	40.9	159.1	50.22	78.02	1
O95396	Adenylyltransferase and sulfurtransferase MOCS3 OS=Homo sapiens OX=9606 GN=MOCS3 PE=1 SV=1	0	78.606	37	12	96	12	460	49.6	6.21	112.73	12	MOCS3	hsa:27304; O95396	0	1.665	0.972752	65.07	48	152	42.29	124.86	1	Met-loss+Acetyl [N-Term]
P15586	N-acetylglucosamine-6-sulfatase OS=Homo sapiens OX=9606 GN=GNS PE=1 SV=3	0	78.591	27	9	359	9	552	62	8.31	688.08	9	GNS	B4DYH8; hsa:2799; P15586; Q53F05	0	1.655	0.964205	54.91	71.2	128.8	39.08	43.95	1
P24928	DNA-directed RNA polymerase II subunit RPB1 OS=Homo sapiens OX=9606 GN=POLR2A PE=1 SV=2	0	78.587	11	13	108	13	1970	217	7.37	120.02	13	POLR2A	A6NN93; B9EH88; hsa:5430; P24928; Q6NX41	0	1.636	0.975926	54.94	18.5	181.5	105.59	46.9	1	Acetyl [N-Term]
P53004	Biliverdin reductase A OS=Homo sapiens OX=9606 GN=BLVRA PE=1 SV=2	0	78.566	47	13	448	13	296	33.4	6.44	854.32	13	BLVRA	A8K747; hsa:644; O95019; P53004; Q86UX0; Q96QL4; Q9BRW8	0	1.366	0.992504	74.57	91.2	108.8	47.21	62.11	1
O43396	Thioredoxin-like protein 1 OS=Homo sapiens OX=9606 GN=TXNL1 PE=1 SV=3	0	78.517	43	9	432	9	289	32.2	4.96	843.8	9	TXNL1	hsa:9352; O43396	0	1.906	0.925961	45.82	54.5	145.5	37.69	22.66	1
P15880	40S ribosomal protein S2 OS=Homo sapiens OX=9606 GN=RPS2 PE=1 SV=2	0	78.491	34	9	881	9	293	31.3	10.24	2111.74	9	RPS2	B2R5G0; D3DU82; hsa:6187; P15880; Q3MIB1	0	1.858	0.938291	67	72.2	127.8	19.62	30.1	1
O95255	ATP-binding cassette sub-family C member 6 OS=Homo sapiens OX=9606 GN=ABCC6 PE=1 SV=2	0	78.465	14	12	167	12	1503	164.8	8.5	298.41	12	ABCC6	A2RRN8; A8KIG6; A8Y988; E7ESW8; hsa:368; O95255; P78420; Q8TCY8; Q9UMZ7	0	1.248	0.998689	58.03	90.5	109.5	18.58	26.7	1
P10155	RNA-binding protein RO60 OS=Homo sapiens OX=9606 GN=RO60 PE=1 SV=2	0	78.464	30	13	403	13	538	60.6	8.03	769.34	13	RO60	B2RBB9; hsa:6738; P10155; Q5LJ98; Q5LJ99; Q5LJA0; Q86WL3; Q86WL4; Q92787; Q9H1W6	0	2.019	0.900456	57.29	53.2	146.8	30.71	27.68	1
P40261	Nicotinamide N-methyltransferase OS=Homo sapiens OX=9606 GN=NNMT PE=1 SV=1	0	78.385	50	8	444	8	264	29.6	5.74	1148.75	8	NNMT	hsa:4837; P40261	0	0.222	0.00525618	108.25	179.8	20.2	57.38	93.07	1
Q96DI7	U5 small nuclear ribonucleoprotein 40 kDa protein OS=Homo sapiens OX=9606 GN=SNRNP40 PE=1 SV=1	0	78.317	43	10	211	10	357	39.3	8.1	275.6	10	SNRNP40	B4DQJ1; hsa:9410; O75938; O95320; Q96DI7	0	2.014	0.905631	64.9	45.8	154.2	61.88	35.42	1
Q00577	Transcriptional activator protein Pur-alpha OS=Homo sapiens OX=9606 GN=PURA PE=1 SV=2	0	78.232	59	11	200	11	322	34.9	6.44	402.91	11	PURA	hsa:5813; Q00577	0	1.477	0.990707	55.55	74.8	125.2	27.6	84.37	1
Q9BZE1	39S ribosomal protein L37, mitochondrial OS=Homo sapiens OX=9606 GN=MRPL37 PE=1 SV=2	0	78.01	40	10	122	10	423	48.1	8.59	200.07	10	MRPL37	hsa:51253; Q96Q67; Q9BWR1; Q9BZE1; Q9P0P3	0	2.299	0.790445	76.15	41.8	158.2	26.45	43.5	1
Q53EL6	Programmed cell death protein 4 OS=Homo sapiens OX=9606 GN=PDCD4 PE=1 SV=2	0	77.917	36	12	256	12	469	51.7	5.21	431.75	12	PDCD4	B2RCV4; B5ME91; hsa:27250; O15501; Q53EL6; Q5VZS6; Q6PJI5; Q8TAR5; Q99834	0	1.788	0.94504	73.45	76.4	123.6	37.23	55.86	1
O95881	Thioredoxin domain-containing protein 12 OS=Homo sapiens OX=9606 GN=TXNDC12 PE=1 SV=1	0	77.841	51	6	227	6	172	19.2	5.4	402.3	6	TXNDC12	B3KQS0; hsa:51060; O95881; Q5T1T4; Q96H50	0	1.762	0.947273	49.51	56.1	143.9	38.34	41.78	1
O14828	Secretory carrier-associated membrane protein 3 OS=Homo sapiens OX=9606 GN=SCAMP3 PE=1 SV=3	0	77.724	35	7	288	7	347	38.3	7.64	683.52	7	SCAMP3	A9Z1W6; B1AVS6; hsa:10067; O14828; O15128; Q96FR8; Q9BPY0	0	2.789	0.559996	102.81	42.7	157.3	70.27	55.67	1
Q9Y223	Bifunctional UDP-N-acetylglucosamine 2-epimerase/N-acetylmannosamine kinase OS=Homo sapiens OX=9606 GN=GNE PE=1 SV=1	0	77.505	18	10	266	10	722	79.2	6.8	416.69	10	GNE	A6PZH2; A6PZH3; A7UNU7; B2R6E1; B7Z372; B7Z428; D3DRP7; F5H499; H0YFA7; hsa:10020; Q0VA94; Q9Y223	0	1.344	0.999419	59.99	75.4	124.6	48.49	65.3	1
P16989	Y-box-binding protein 3 OS=Homo sapiens OX=9606 GN=YBX3 PE=1 SV=4	0	77.406	16	6	400	1	372	40.1	9.77	936.56	6	YBX3	B2RBW6; hsa:8531; P16989; Q14121; Q969N6; Q96B76	0	1.413	0.996481	78.89	94.8	105.2	48.33	69.38	1
P52790	Hexokinase-3 OS=Homo sapiens OX=9606 GN=HK3 PE=1 SV=2	0	77.367	19	14	259	12	923	99	5.4	482.42	14	HK3	hsa:3101; P52790; Q8N1E7	0	0.89	0.954646	64.79	88.2	111.8	19.85	25.46	1
Q96AQ6	Pre-B-cell leukemia transcription factor-interacting protein 1 OS=Homo sapiens OX=9606 GN=PBXIP1 PE=1 SV=1	0	77.313	27	15	181	15	731	80.6	5.33	303.73	15	PBXIP1	hsa:57326; Q5T174; Q5T176; Q96AQ6; Q9H8X6; Q9HA02; Q9HD85	0	1.555	0.983577	75.8	63.3	136.7	45.56	96.33	1
P00488	Coagulation factor XIII A chain OS=Homo sapiens OX=9606 GN=F13A1 PE=1 SV=5	0	77.245	25	15	220	15	732	83.2	6	325.41	15	F13A1	hsa:2162; P00488; Q59HA7; Q8N6X2; Q96P24; Q9BX29	0	1.441	0.992504	59.57	100.5	99.5	65.61	76.01	1
O95822	Malonyl-CoA decarboxylase, mitochondrial OS=Homo sapiens OX=9606 GN=MLYCD PE=1 SV=3	0	77.113	32	13	218	13	493	55	8.95	430.41	13	MLYCD	hsa:23417; O95822; Q9UNU5; Q9Y3F2	0	0.809	0.846055	75.58	155.9	44.1	31.98	106.13	1
P04839	Cytochrome b-245 heavy chain OS=Homo sapiens OX=9606 GN=CYBB PE=1 SV=2	0	77.024	23	9	221	9	570	65.3	8.63	378.7	9	CYBB	A8K138; hsa:1536; P04839; Q2PP16	0	0.909	0.938291	83.14	131.4	68.6	33.54	106.51	1
Q9BQS8	FYVE and coiled-coil domain-containing protein 1 OS=Homo sapiens OX=9606 GN=FYCO1 PE=1 SV=3	0	76.911	13	15	139	15	1478	166.9	4.92	216.07	15	FYCO1	B7ZKT7; hsa:79443; Q3MJE6; Q86T41; Q86TB1; Q8TEF9; Q96IV5; Q9BQS8; Q9H8P9	0	1.57	0.975926	52.5	53.2	146.8	48.8	42.76	1
P36542	ATP synthase subunit gamma, mitochondrial OS=Homo sapiens OX=9606 GN=ATP5F1C PE=1 SV=1	0	76.911	43	12	658	12	298	33	9.22	1353	12	ATP5F1C	A8KA31; hsa:509; P36542; Q5VYP3; Q6I9V2; Q96AS8	0	0.917	0.961162	61.5	101.7	98.3	19.66	51.14	1
O15438	ATP-binding cassette sub-family C member 3 OS=Homo sapiens OX=9606 GN=ABCC3 PE=1 SV=3	0	76.827	11	10	191	10	1527	169.2	7.2	337.46	10	ABCC3	B2RPA9; D3DTX9; hsa:8714; O15438; O60265; O60922; O75621; O95078; O95289; O95290; Q86X85; Q9UN52	0	1.602	0.972713	92.82	123	77	41.21	77.06	1
O75146	Huntingtin-interacting protein 1-related protein OS=Homo sapiens OX=9606 GN=HIP1R PE=1 SV=2	0	76.635	17	14	147	13	1068	119.3	6.67	171.28	14	HIP1R	A6NHQ6; hsa:9026; O75146; Q6NXG8; Q9UED9	1	1.283	0.998585	58.3	54.8	145.2	72.57	55.74	1
P23368	NAD-dependent malic enzyme, mitochondrial OS=Homo sapiens OX=9606 GN=ME2 PE=1 SV=1	0	76.51	33	14	358	14	584	65.4	7.61	590.3	14	ME2	B2R8J2; hsa:4200; P23368; Q9BWL6; Q9BYG1; Q9H4B2	0	1.264	0.998585	74.43	89.5	110.5	11.28	61.84	1
O95834	Echinoderm microtubule-associated protein-like 2 OS=Homo sapiens OX=9606 GN=EML2 PE=1 SV=1	0	76.371	26	13	179	12	649	70.6	6.32	277.84	13	EML2	B7Z3I2; B7Z3Q9; hsa:24139; K7ERL7; O95834; Q59EN8; Q8N5A2; Q9UG50	1	1.383	0.993203	84.93	104.4	95.6	29.46	68.49	1
O00303	Eukaryotic translation initiation factor 3 subunit F OS=Homo sapiens OX=9606 GN=EIF3F PE=1 SV=1	0	76.229	38	9	456	9	357	37.5	5.45	963.47	9	EIF3F	A8K0S2; hsa:8665; O00303; Q6IB45; Q8N978	0	1.757	0.947874	49.42	77.5	122.5	21.16	30.06	1
O60547	GDP-mannose 4,6 dehydratase OS=Homo sapiens OX=9606 GN=GMDS PE=1 SV=1	0	76.21	40	12	328	12	372	41.9	7.31	584.82	12	GMDS	E9PI88; hsa:2762; O60547; O75357; Q5T954; Q6FH09; Q9UGZ3; Q9UJK9	0	2.118	0.878743	81.96	72.4	127.6	33.97	54.4	1
Q9Y224	RNA transcription, translation and transport factor protein OS=Homo sapiens OX=9606 GN=RTRAF PE=1 SV=1	0	76.168	30	7	312	7	244	28.1	6.65	798.49	7	RTRAF	hsa:51637; Q9Y224	0	1.624	0.968009	50.41	77.3	122.7	19.44	25.18	1
Q01105	Protein SET OS=Homo sapiens OX=9606 GN=SET PE=1 SV=3	0	76.05	30	9	408	9	290	33.5	4.32	848.38	9	SET	A5A5H4; A6NGV1; B4DUE2; hsa:6418; Q01105; Q15541; Q5VXV1; Q5VXV2; Q6FHZ5	0	1.663	0.963764	87.01	85.5	114.5	19.4	25.03	1
P55010	Eukaryotic translation initiation factor 5 OS=Homo sapiens OX=9606 GN=EIF5 PE=1 SV=2	0	76.008	29	11	457	11	431	49.2	5.58	827.32	11	EIF5	hsa:1983; P55010; Q53XB3; Q9H5N2; Q9UG48	0	1.724	0.956013	65.05	61.6	138.4	37.68	52.88	1
Q8N0Y7	Probable phosphoglycerate mutase 4 OS=Homo sapiens OX=9606 GN=PGAM4 PE=3 SV=1	0	75.987	48	9	323	2	254	28.8	6.65	569.71	9	PGAM4	hsa:441531; Q5JPN2; Q8N0Y7; Q8NI24; Q8NI25; Q8NI26	0								1	Met-loss+Acetyl [N-Term]
P62888	60S ribosomal protein L30 OS=Homo sapiens OX=9606 GN=RPL30 PE=1 SV=2	0	75.753	67	7	417	7	115	12.8	9.63	827.18	7	RPL30	B2R591; hsa:6156; P04645; P62888; Q502Z6	0	1.874	0.936521	78.4	68.8	131.2	19.92	55.67	1
Q8NHP1	Aflatoxin B1 aldehyde reductase member 4 OS=Homo sapiens OX=9606 GN=AKR7L PE=2 SV=7	0	75.738	27	7	736	1	331	36.9	6.87	1682.96	7	AKR7L	hsa:246181; Q5U614; Q8NHP1	0	0.388	0.0403261	67.34	148	52	43.23	45.58	1
Q5TCH4	Cytochrome P450 4A22 OS=Homo sapiens OX=9606 GN=CYP4A22 PE=1 SV=1	0	75.557	34	14	227	1	519	59.2	9.06	270.17	14	CYP4A22	hsa:284541; Q5TCH3; Q5TCH4; Q6JXK7; Q6JXK8; Q9NRM4	0								1
O00429	Dynamin-1-like protein OS=Homo sapiens OX=9606 GN=DNM1L PE=1 SV=2	0	75.549	23	14	373	14	736	81.8	6.81	584.65	14	DNM1L	A8K4X9; B4DGC9; B4DSU8; G8JLD5; hsa:10059; J3KPI2; O00429; O14541; O60709; Q59GN9; Q7L6B3; Q8TBT7; Q9BWM1; Q9Y5J2	0	1.5	0.980663	42.28	82.3	117.7	13.06	20.12	1	Acetyl [N-Term]
Q9H2G2	STE20-like serine/threonine-protein kinase OS=Homo sapiens OX=9606 GN=SLK PE=1 SV=1	0	75.486	17	14	197	14	1235	142.6	5.15	166.58	14	SLK	D3DRA0; D3DRA1; hsa:9748; O00211; Q6P1Z4; Q86WU7; Q86WW1; Q92603; Q9H2G2; Q9NQL0; Q9NQL1	0	1.28	0.998449	73.91	164.1	35.9	54.14	135.14	1
O95299	NADH dehydrogenase [ubiquinone] 1 alpha subcomplex subunit 10, mitochondrial OS=Homo sapiens OX=9606 GN=NDUFA10 PE=1 SV=1	0	75.472	44	12	472	12	355	40.7	8.48	737.15	12	NDUFA10	hsa:4705; O95299; Q8WXC9	0	1.033	0.980663	71.31	93.9	106.1	24.23	46.81	1
Q5VW32	BRO1 domain-containing protein BROX OS=Homo sapiens OX=9606 GN=BROX PE=1 SV=1	0	75.404	33	9	208	9	411	46.4	7.65	458.07	9	BROX	B7Z9G5; hsa:148362; Q5VW32; Q96MG1	0	1.936	0.919583	77.28	49.2	150.8	46.49	31.98	1
O00267	Transcription elongation factor SPT5 OS=Homo sapiens OX=9606 GN=SUPT5H PE=1 SV=1	0	75.394	18	15	186	15	1087	120.9	5.06	244.89	15	SUPT5H	hsa:6829; O00267; O43279; Q59G52; Q99639	0	2.033	0.896853	58.14	29.2	170.8	97.96	53.08	1
Q15907	Ras-related protein Rab-11B OS=Homo sapiens OX=9606 GN=RAB11B PE=1 SV=4	0	75.317	56	11	634	11	218	24.5	5.94	1347.78	11	RAB11B	A5YM50; B2R7I4; B4DMK0; D6W671; hsa:9230; Q15907; Q2YDT2; Q5U0I1; Q6FHR0; Q6FI42; Q8NI07	0	1.521	0.978461	40.33	88.2	111.8	19.95	21.53	1	Met-loss+Acetyl [N-Term]
P05121	Plasminogen activator inhibitor 1 OS=Homo sapiens OX=9606 GN=SERPINE1 PE=1 SV=1	0	75.275	30	11	95	11	402	45	7.2	164	11	SERPINE1	B7Z4S0; F8WD53; hsa:5054; P05121	0	2.011	0.902141	85.38	64.3	135.7	54.64	87.18	1
O94875	Sorbin and SH3 domain-containing protein 2 OS=Homo sapiens OX=9606 GN=SORBS2 PE=1 SV=3	0	75.234	17	15	329	14	1100	124	8.31	375.7	15	SORBS2	A6NEK9; B3KPQ7; B7Z1G5; B7Z3X6; C9JKV9; D3DP62; D3DP63; E9PAS5; E9PAW4; G3XAI0; H7BXR4; hsa:8470; J3KNZ5; O60592; O60593; O94875; Q96EX0	0	0.812	0.923322	59.25	122.9	77.1	20.65	78.24	1
Q9UKV8	Protein argonaute-2 OS=Homo sapiens OX=9606 GN=AGO2 PE=1 SV=3	0	75.231	21	14	139	10	859	97.1	9.19	139.44	14	AGO2	hsa:27161; Q8TCZ5; Q8WV58; Q96ID1; Q9UKV8	4	1.341	0.998449	91.85	97.8	102.2	41.42	27.8	1
Q14558	Phosphoribosyl pyrophosphate synthase-associated protein 1 OS=Homo sapiens OX=9606 GN=PRPSAP1 PE=1 SV=2	0	75.207	38	9	295	7	356	39.4	7.2	494.34	9	PRPSAP1	B2R6M4; hsa:5635; Q14558; Q96H06	2	1.113	0.9904	57.02	90.8	109.2	18.66	79.84	1
Q14137	Ribosome biogenesis protein BOP1 OS=Homo sapiens OX=9606 GN=BOP1 PE=1 SV=2	0	75.049	23	11	159	11	746	83.6	6.19	265.26	11	BOP1	hsa:23246; Q14137; Q969Z6; Q96IS8; Q96Q25; Q9BSA7; Q9BVM0	0	2.892	0.422175	66.23	22.7	177.3	79.48	59.78	1
Q8N2S1	Latent-transforming growth factor beta-binding protein 4 OS=Homo sapiens OX=9606 GN=LTBP4 PE=1 SV=2	0	75.011	15	15	241	15	1624	173.3	5.43	191.81	15	LTBP4	hsa:8425; O00508; O75412; O75413; Q8N2S1	0	0.67	0.64025	66.14	124.5	75.5	50.22	69.72	1
Q13564	NEDD8-activating enzyme E1 regulatory subunit OS=Homo sapiens OX=9606 GN=NAE1 PE=1 SV=1	0	74.998	37	12	140	12	534	60.2	5.4	124.55	12	NAE1	A6NCK0; A6NFN4; A8MU28; B2R700; B3KUP9; hsa:8883; Q13564	0	1.586	0.975926	60	49	151	47.09	39.65	1
P49790	Nuclear pore complex protein Nup153 OS=Homo sapiens OX=9606 GN=NUP153 PE=1 SV=2	0	74.962	13	14	178	14	1475	153.8	8.73	205.68	14	NUP153	B4DIK2; E7EPX5; F6QR24; hsa:9972; P49790; Q4LE47; Q5T9I7; Q7Z743	0	2.016	0.902141	62.29	66.4	133.6	31.65	22.22	1
O43681	ATPase GET3 OS=Homo sapiens OX=9606 GN=GET3 PE=1 SV=2	0	74.896	44	9	332	9	348	38.8	4.91	697.75	9	GET3	A6NHP8; A8K740; hsa:439; O43681; Q53FC6; Q92849	0	1.266	0.998449	51.91	86.3	113.7	32.65	25.71	1	Met-loss+Acetyl [N-Term]
Q9BY44	Eukaryotic translation initiation factor 2A OS=Homo sapiens OX=9606 GN=EIF2A PE=1 SV=3	0	74.864	32	13	204	13	585	64.9	8.87	267.59	13	EIF2A	A8MPS6; B4DF96; B4DQ14; D3DNI9; hsa:83939; Q5QTR2; Q7Z4E9; Q8NFM1; Q96EW9; Q96K81; Q9BY44	0	1.784	0.953	56.1	48.7	151.3	42.58	53.08	1
O75534	Cold shock domain-containing protein E1 OS=Homo sapiens OX=9606 GN=CSDE1 PE=1 SV=2	0	74.835	24	16	184	16	798	88.8	6.25	266.88	16	CSDE1	A8K281; E9PGZ0; G5E9Q2; hsa:7812; O75534; O94961; Q5TF04; Q5TF05; Q68DF1; Q68DI9; Q9Y2S4	0	1.594	0.975926	58	76.1	123.9	32.21	59.9	1
P29466	Caspase-1 OS=Homo sapiens OX=9606 GN=CASP1 PE=1 SV=1	0	74.812	27	8	175	8	404	45.1	5.91	304.04	8	CASP1	B5MDZ1; hsa:834; P29466; Q53EY6; Q6DMQ1; Q6GSS3; Q6PI75; Q9UCN3	0	1.076	0.978845	61.51	132.2	67.8	31.1	62.66	1
Q96P70	Importin-9 OS=Homo sapiens OX=9606 GN=IPO9 PE=1 SV=3	0	74.755	16	12	237	12	1041	115.9	4.81	516.39	12	IPO9	B1ASV5; hsa:55705; Q8N1Y1; Q8N3I2; Q8NCG9; Q96P70; Q96SU6; Q9NW01; Q9P0A8; Q9ULM8	0	1.649	0.970482	61.91	50.7	149.3	47.04	28.53	1	Met-loss+Acetyl [N-Term]
Q8WUY1	Protein THEM6 OS=Homo sapiens OX=9606 GN=THEM6 PE=1 SV=2	0	74.503	38	8	285	8	208	23.9	9.55	576.97	8	THEM6	B2RDN6; hsa:51337; Q8NBN2; Q8WUY1; Q9NYI2	0	1.223	0.998585	73.94	77	123	28.46	70.27	1
Q9H2W6	39S ribosomal protein L46, mitochondrial OS=Homo sapiens OX=9606 GN=MRPL46 PE=1 SV=1	0	74.448	52	11	217	11	279	31.7	7.05	372.21	11	MRPL46	B2RD75; hsa:26589; Q9H2W6; Q9HBU8	0	1.912	0.928554	65.8	50.2	149.8	29.2	68.81	1
P37268	Squalene synthase OS=Homo sapiens OX=9606 GN=FDFT1 PE=1 SV=1	0	74.285	42	14	196	14	417	48.1	6.54	366.33	14	FDFT1	B3KQ95; B4DJE5; B4DT56; B7Z1J3; hsa:2222; P37268; Q96GT0	0	1.848	0.940848	89.11	60	140	79.23	87.26	1
Q14566	DNA replication licensing factor MCM6 OS=Homo sapiens OX=9606 GN=MCM6 PE=1 SV=1	0	74.198	20	13	209	13	821	92.8	5.41	417.35	13	MCM6	B2R6H2; hsa:4175; Q13504; Q14566; Q99859	0	2.403	0.728566	78.33	31.4	168.6	38.91	62.51	1	Acetyl [N-Term]
P06702	Protein S100-A9 OS=Homo sapiens OX=9606 GN=S100A9 PE=1 SV=1	0	74.172	62	8	237	8	114	13.2	6.13	457.74	8	S100A9	D3DV36; hsa:6280; P06702; Q6FGA1; Q9NYM0; Q9UCJ1	0	1.662	0.964926	101.76	125.9	74.1	77.88	123.91	1
O75937	DnaJ homolog subfamily C member 8 OS=Homo sapiens OX=9606 GN=DNAJC8 PE=1 SV=2	0	74.163	32	7	200	7	253	29.8	9.06	348.08	7	DNAJC8	B4DUU4; D3DPM0; hsa:22826; O75937; Q6IBA4; Q8N4Z5; Q9P051; Q9P067	0	1.486	0.984689	61.23	79	121	32.84	37.05	1
P20340	Ras-related protein Rab-6A OS=Homo sapiens OX=9606 GN=RAB6A PE=1 SV=3	0	74.104	54	11	679	10	208	23.6	5.54	1505.3	11	RAB6A	A8K133; B7Z772; F5H668; hsa:5870; P20340; Q1W5D8; Q5U0A8; Q9UBE4	0	1.718	0.956013	55.89	72.8	127.2	44.02	27.9	1	Met-loss+Acetyl [N-Term]
Q96CN7	Isochorismatase domain-containing protein 1 OS=Homo sapiens OX=9606 GN=ISOC1 PE=1 SV=3	0	74.054	44	12	540	12	298	32.2	7.39	1006.89	12	ISOC1	hsa:51015; Q7Z770; Q96CN7	0	0.843	0.940848	76.42	128.3	71.7	33.07	67.87	1
Q9BV57	Acireductone dioxygenase OS=Homo sapiens OX=9606 GN=ADI1 PE=1 SV=1	0	74.005	65	10	547	10	179	21.5	5.68	1053.57	10	ADI1	D6W4Y3; hsa:55256; Q53HW3; Q53QD3; Q57YV7; Q68CK2; Q6ZSF7; Q7Z512; Q96P85; Q9BV57; Q9NV57	0	0.93	0.964343	66.96	104.8	95.2	24.31	42.7	1	Met-loss [N-Term]
P24043	Laminin subunit alpha-2 OS=Homo sapiens OX=9606 GN=LAMA2 PE=1 SV=4	0	73.922	9	18	51	18	3122	343.7	6.4	70.38	18	LAMA2	hsa:3908; P24043; Q14736; Q5VUM2; Q93022	0	0.661	0.529929	114.01	153.6	46.4	57.48	75.27	1
P20020	Plasma membrane calcium-transporting ATPase 1 OS=Homo sapiens OX=9606 GN=ATP2B1 PE=1 SV=4	0	73.879	18	14	118	9	1220	134.6	5.91	163.09	14	ATP2B1	hsa:490; P20020; Q12992; Q12993; Q13819; Q13820; Q13821; Q16504; Q93082	0	2.153	0.854767	80.78	36	164	113.42	38.11	1	Met-loss+Acetyl [N-Term]
Q8NBJ7	Inactive C-alpha-formylglycine-generating enzyme 2 OS=Homo sapiens OX=9606 GN=SUMF2 PE=1 SV=2	0	73.833	37	10	389	10	301	33.8	8	717.78	10	SUMF2	B4DU41; B4DWQ0; hsa:25870; Q14DW5; Q53ZE3; Q8NBJ7; Q96BH2; Q9BRN3; Q9BWI1; Q9Y405	0	1.003	0.975926	68.73	109.2	90.8	28.83	61.44	1
P10599	Thioredoxin OS=Homo sapiens OX=9606 GN=TXN PE=1 SV=3	0	73.807	90	9	1708	9	105	11.7	4.92	2036.1	9	TXN	B1ALW1; hsa:7295; O60744; P10599; Q53X69; Q96KI3; Q9UDG5	0	2.089	0.884828	70.23	64.2	135.8	37.58	35.67	1
Q9BW92	Threonine--tRNA ligase, mitochondrial OS=Homo sapiens OX=9606 GN=TARS2 PE=1 SV=1	0	73.766	29	16	285	16	718	81	7.3	417.65	16	TARS2	hsa:80222; Q53GW7; Q96I50; Q9BW92; Q9H9V2	0	1.552	0.975926	73.45	92.9	107.1	43.76	27.86	1
Q53H12	Acylglycerol kinase, mitochondrial OS=Homo sapiens OX=9606 GN=AGK PE=1 SV=2	0	73.715	40	11	209	11	422	47.1	8.09	407.94	11	AGK	hsa:55750; Q53H12; Q75KN1; Q96GC3; Q9NP48	0	1.58	0.972752	47.28	66.6	133.4	19.11	20.8	1
P26368	Splicing factor U2AF 65 kDa subunit OS=Homo sapiens OX=9606 GN=U2AF2 PE=1 SV=4	0	73.683	27	9	262	9	475	53.5	9.09	453.18	9	U2AF2	hsa:11338; P26368; Q96HC5	0	2.21	0.813648	64.64	52.3	147.7	31.64	43.33	1	Met-loss+Acetyl [N-Term]
O43837	Isocitrate dehydrogenase [NAD] subunit beta, mitochondrial OS=Homo sapiens OX=9606 GN=IDH3B PE=1 SV=2	0	73.653	37	13	195	13	385	42.2	8.46	295.67	13	IDH3B	B2RDR1; D3DVX2; D3DVX3; hsa:3420; O43837; O95106; Q5JXS8; Q9NQ06; Q9NQ07; Q9NUZ0; Q9UEX0; Q9UG99	0	1.729	0.957664	50.79	68	132	35.88	43.88	1
Q9Y3L5	Ras-related protein Rap-2c OS=Homo sapiens OX=9606 GN=RAP2C PE=1 SV=1	0	73.536	59	8	400	2	183	20.7	4.94	824.68	8	RAP2C	B3KWD6; hsa:57826; Q5H9H9; Q9BTS0; Q9Y3L5	0	1.135	0.975438	79.01	96.1	103.9	38.61	102.42	1
Q7KZ85	Transcription elongation factor SPT6 OS=Homo sapiens OX=9606 GN=SUPT6H PE=1 SV=2	0	73.515	13	14	176	14	1726	198.9	4.91	204.41	14	SUPT6H	A7E2B4; hsa:6830; Q15737; Q6GMQ4; Q7KYW9; Q7KZ85; Q7LDK4; Q8N526; Q92775; Q96AH3; Q9BTH9; Q9BTI2	0	1.562	0.975804	65.72	78.2	121.8	34.29	40.69	1	Met-loss+Acetyl [N-Term]
Q96FV2	Secernin-2 OS=Homo sapiens OX=9606 GN=SCRN2 PE=1 SV=3	0	73.49	35	9	351	9	425	46.6	5.67	813.06	9	SCRN2	A8K3N1; B7Z8S7; E9PBV5; hsa:90507; Q96AC3; Q96FV2; Q9BU04	0	0.828	0.938291	60.99	104.5	95.5	12.91	27.72	1
P20853	Cytochrome P450 2A7 OS=Homo sapiens OX=9606 GN=CYP2A7 PE=2 SV=2	0	73.433	20	12	240	1	494	56.4	7.84	517.15	12	CYP2A7	hsa:1549; P20853; Q13121	0	0.01	2.00326e-16		200		88.67		1
Q15813	Tubulin-specific chaperone E OS=Homo sapiens OX=9606 GN=TBCE PE=1 SV=1	0	73.389	34	11	148	11	527	59.3	6.76	336.15	11	TBCE	A8K8C2; B7Z3P1; hsa:6905; Q15813	0	1.933	0.919583	97.82	92.9	107.1	24.35	37.72	1
Q96C11	FGGY carbohydrate kinase domain-containing protein OS=Homo sapiens OX=9606 GN=FGGY PE=1 SV=2	0	73.349	26	12	237	12	551	60	6.35	398.17	12	FGGY	B1AK92; B1AK93; B1AK94; B2RDR8; D3DQ56; hsa:55277; Q96C11; Q9HA63; Q9NV20	0	0.539	0.472696	100.19	147	53	36.86	29.08	1
Q9BXJ9	N-alpha-acetyltransferase 15, NatA auxiliary subunit OS=Homo sapiens OX=9606 GN=NAA15 PE=1 SV=1	0	73.169	23	16	188	12	866	101.2	7.42	227.8	16	NAA15	D3DNY6; hsa:80155; Q52LG9; Q8IWH4; Q8NEV2; Q9BXJ9; Q9H8P6	3	1.633	0.966611	66.89	59.3	140.7	36.14	34.97	1
Q9UBR2	Cathepsin Z OS=Homo sapiens OX=9606 GN=CTSZ PE=1 SV=1	0	73.12	26	6	570	6	303	33.8	7.11	1139.4	6	CTSZ	B2RC40; hsa:1522; O75331; Q9UBR2; Q9UQV5; Q9UQV6	0	0.75	0.896215	69.31	110.9	89.1	52.7	52.69	1
Q9H0R4	Haloacid dehalogenase-like hydrolase domain-containing protein 2 OS=Homo sapiens OX=9606 GN=HDHD2 PE=1 SV=1	0	73.109	61	8	156	8	259	28.5	6.24	203.6	8	HDHD2	A8K7T3; hsa:84064; Q96NV4; Q9H0R4	0	1.352	0.998449	67.01	95	105	49.63	74.83	1
Q9BZZ5	Apoptosis inhibitor 5 OS=Homo sapiens OX=9606 GN=API5 PE=1 SV=3	0	73.039	28	11	371	11	524	59	7.34	733.71	11	API5	B4DGR0; B4DRJ2; B4E283; D3DR21; G3V1C3; hsa:8539; O15441; Q9BZZ5; Q9Y4J7	0	1.711	0.956013	55.18	85.4	114.6	18.7	31.91	1	Met-loss [N-Term]
P60900	Proteasome subunit alpha type-6 OS=Homo sapiens OX=9606 GN=PSMA6 PE=1 SV=1	0	72.978	51	9	590	9	246	27.4	6.76	1368.81	9	PSMA6	B2R7J9; B4DQR4; B4DXJ9; hsa:5687; P34062; P60900; Q6IB60	0	1.251	0.998585	43.49	86.5	113.5	15.39	24.85	1
P10451	Osteopontin OS=Homo sapiens OX=9606 GN=SPP1 PE=1 SV=1	0	72.92	31	6	54	6	314	35.4	4.58	149.69	6	SPP1	B2RDA1; hsa:6696; P10451; Q15681; Q15682; Q15683; Q4W597; Q567T5; Q8NBK2; Q96IZ1	0	0.108	6.94778e-06	323.51	158.2	41.8		49.32	1
Q96KG9	N-terminal kinase-like protein OS=Homo sapiens OX=9606 GN=SCYL1 PE=1 SV=1	0	72.875	23	12	328	12	808	89.6	6.3	354.44	12	SCYL1	A6NJF1; hsa:57410; Q96G50; Q96KG8; Q96KG9; Q96KH1; Q9HAW5; Q9HBL3; Q9NR53	0	1.231	0.996073	47.03	91.5	108.5	22.87	41.74	1
Q9NSK0	Kinesin light chain 4 OS=Homo sapiens OX=9606 GN=KLC4 PE=1 SV=3	0	72.824	29	14	269	9	619	68.6	6.18	478.69	14	KLC4	B3KNY4; B3KPI3; B3KSQ3; B4DME9; hsa:89953; Q66K28; Q96EG6; Q9NSK0	4	1.69	0.957664	59.43	60.6	139.4	23.39	28.28	1	Met-loss+Acetyl [N-Term]
Q9NYL9	Tropomodulin-3 OS=Homo sapiens OX=9606 GN=TMOD3 PE=1 SV=1	0	72.762	36	9	425	9	352	39.6	5.19	974.8	9	TMOD3	B2R6G7; hsa:29766; Q9NT43; Q9NYL9; Q9NZR0	0	1.532	0.975926	40.15	77.6	122.4	33.09	23.38	1
P52788	Spermine synthase OS=Homo sapiens OX=9606 GN=SMS PE=1 SV=2	0	72.742	51	8	127	8	366	41.2	5.02	175.33	8	SMS	A6NHA7; A6NI34; B2R9M0; hsa:6611; O00544; P52788; Q9UQS1	0	1.158	0.99383	70.71	122.2	77.8	27.74	55.76	1
Q16819	Meprin A subunit alpha OS=Homo sapiens OX=9606 GN=MEP1A PE=1 SV=2	0	72.702	21	12	103	12	746	84.4	5.72	205.89	12	MEP1A	A2RRM4; B0AZP9; B2RCS2; hsa:4224; Q16819; Q8TDC9; Q9H1R1	0	0.206	0.00299582	124.7	159.8	40.2	57.41	110.07	1
P47985	Cytochrome b-c1 complex subunit Rieske, mitochondrial OS=Homo sapiens OX=9606 GN=UQCRFS1 PE=1 SV=2	0	72.66	47	10	547	10	274	29.6	8.32	1563.02	10	UQCRFS1	A8K519; hsa:7386; P47985; Q6NVX5; Q9UPH2	0	1.079	0.98865	49.85	105.6	94.4	19.89	29.58	1
Q8N573	Oxidation resistance protein 1 OS=Homo sapiens OX=9606 GN=OXR1 PE=1 SV=2	0	72.646	21	11	130	11	874	97.9	5.47	177.12	11	OXR1	A6NK11; A8KA34; B3KXL1; B7Z402; B7Z8N5; D3HIS6; hsa:55074; Q3LIB5; Q6ZVK9; Q8N573; Q8N8V0; Q9H266; Q9NWC7	0	1.26	0.998585	99.76	103.7	96.3	22.18	37.48	1
P15259	Phosphoglycerate mutase 2 OS=Homo sapiens OX=9606 GN=PGAM2 PE=1 SV=3	0	72.628	39	8	317	2	253	28.7	8.88	587.8	8	PGAM2	hsa:5224; P15259	0	1.154	0.975926	80.86	53.8	146.2	44.03	134.83	1
Q9Y512	Sorting and assembly machinery component 50 homolog OS=Homo sapiens OX=9606 GN=SAMM50 PE=1 SV=3	0	72.578	33	10	281	10	469	51.9	6.9	399.14	10	SAMM50	hsa:25813; Q53HC4; Q56VW7; Q969Y9; Q96I46; Q9NW85; Q9UQM9; Q9Y512	0	1.02	0.97911	95.91	162.9	37.1	23.82	63.28	1
[truncated: 4,855 more rows]

## Sheet: S3
Table S3 6121 differential quantified proteins between HCC tumour and non-tumour tissues
[truncated: 6,122 more rows]

## Sheet: S4
Table S4 Detailed information of unique proteins identified in HCC tumour tissues
[truncated: 445 more rows]
[truncated: 92 more columns]

## Sheet: S5
Table S5 Detailed information of unique proteins identified in adjacent non-tumour tissues
[truncated: 117 more rows]
[truncated: 92 more columns]

[truncated: 13 more sheets: S6, S7, S8, S9, S10, S11, S12, S13, S14, S15, S16, S17, S18]
